# Supplementary material for: Integrated exome and RNA sequencing of TFE3-translocation renal cell carcinoma
Source: Research Square preprint supplement (doi:10.21203/rs.3.rs-296261/v1), 2021-03-11
Supplement: Supplementary file 2 [file 4fcb85a92a91f8d093cda705.xlsx]

## Sheet: DEG
Gene	BaseMean	log2FoldChange	lfcSE	stat	pvalue (Tumor vs. Normal)	padjust (Tumor vs. Normal)	Mean Count Of Tumor	Mean Count Of Normal
NMRK2	3398.03	8.24345	0.430932	19.1294	1.43807e-81	5.39953e-77	4798.89	17.5
GPR143	1230.63	5.55446	0.302882	18.3387	4.06191e-75	7.62563e-71	1578.76	46.8571
PKD1L2	4695.83	6.71656	0.368506	18.2265	3.18233e-74	3.9829e-70	5531.87	69.7143
BHLHE41	1804.09	4.39715	0.253143	17.3702	1.38701e-67	1.30195e-63	1897.57	142.857
TRIM63	1799.51	7.51475	0.449535	16.7167	9.90528e-63	7.43827e-59	2457.41	13.4286
SV2B	1614.83	5.99142	0.377051	15.8902	7.40686e-57	4.63509e-53	2203.14	39
HABP2	3521.26	5.82415	0.372006	15.6561	3.01921e-55	1.61946e-51	4844.87	101.786
DKFZP434L187	272.769	6.74131	0.440218	15.3136	6.20674e-53	2.91306e-49	325.952	4.42857
GPNMB	16160.3	5.40469	0.377799	14.3057	2.01558e-46	8.40879e-43	19852.9	611.714
BIRC7	930.968	6.92766	0.496914	13.9414	3.5508e-44	1.33322e-40	1055.17	14.1429
LDLRAD3	517.712	3.01785	0.216684	13.9274	4.31518e-44	1.47293e-40	647.921	106.5
IGFN1	15545.8	6.61834	0.500554	13.222	6.5489e-40	2.0491e-36	17393.4	251.929
CPEB1	390.487	4.01287	0.303646	13.2156	7.13101e-40	2.0596e-36	518.937	40.5714
IRX6	550.44	4.54749	0.345508	13.1618	1.45642e-39	3.90602e-36	636.746	42.2143
RP5-916O11.3	65.4437	3.22669	0.252328	12.7877	1.92136e-37	4.80941e-34	76.6508	11.0714
RP11-261B23.1	174.253	7.18084	0.561971	12.7779	2.17749e-37	5.10988e-34	221.016	2
RP13-395E19.2	269.539	7.27904	0.586248	12.4163	2.13138e-35	4.70747e-32	328.048	2.92857
AHNAK2	10221.9	5.96323	0.484403	12.3105	7.95509e-35	1.65939e-31	13711.4	308.071
C2	471.539	3.82361	0.313978	12.1779	4.07471e-34	8.05227e-31	571.587	55.2857
EEF1A2	1422.04	7.28864	0.599978	12.1482	5.8661e-34	1.10127e-30	1997.1	16.3571
HS3ST2	458.569	8.05861	0.663836	12.1395	6.52499e-34	1.16664e-30	637.698	3.35714
ACP5	2613.72	3.90879	0.325107	12.0231	2.68717e-33	4.58614e-30	3604.59	292.643
APOC1	398.796	5.48054	0.457304	11.9845	4.28597e-33	6.99675e-30	538.73	13.7143
SH3PXD2B	2918.57	3.79435	0.318283	11.9213	9.16566e-33	1.43393e-29	3014.41	294.929
RP11-383H13.1	200.989	2.5106	0.211535	11.8685	1.72506e-32	2.59084e-29	232.19	57.4286
CHST11	756.009	3.15379	0.266774	11.822	3.00533e-32	4.34005e-29	894.238	140.571
TSPAN10	1542.82	5.16979	0.43767	11.8121	3.38051e-32	4.70103e-29	1824.56	66.8571
ARX	187.492	7.31173	0.621623	11.7623	6.10254e-32	8.18329e-29	163.857	2
SCG5	66.931	5.33836	0.454915	11.7349	8.44715e-32	1.09367e-28	89.9048	2.92857
SPSB1	660.335	2.67041	0.228416	11.691	1.41702e-31	1.77349e-28	778.111	171.214
RAB32	242.666	2.74664	0.235396	11.6682	1.8533e-31	2.24471e-28	323.524	61.8571
HRK	409.111	6.38938	0.555344	11.5053	1.24114e-30	1.45629e-27	393.317	6.5
VCAN	4278.04	3.55313	0.30946	11.4817	1.63028e-30	1.80036e-27	5690.27	680.857
SLC6A15	319.99	6.87967	0.59913	11.4828	1.6105e-30	1.80036e-27	447.238	5
CRYAB	7562.42	2.70992	0.237804	11.3956	4.39817e-30	4.71823e-27	9748.98	1994.14
MSC	551.289	4.00761	0.354738	11.2974	1.35175e-29	1.40984e-26	681.016	62.2857
LILRB4	110.258	2.87618	0.255761	11.2455	2.43592e-29	2.47193e-26	140.111	24.9286
KLK4	923.649	8.6335	0.768728	11.2309	2.87555e-29	2.84127e-26	1234.32	3.92857
ABCB5	1885.94	7.6267	0.68103	11.1988	4.1342e-29	3.98018e-26	1673.83	13.7143
RP11-382B18.1	135.748	4.32359	0.386661	11.1819	5.00225e-29	4.69549e-26	174.54	11.1429
SPON2	4934.42	3.55156	0.319242	11.125	9.4828e-29	8.68416e-26	5621.87	716.857
PIM1	1220.51	2.31475	0.208221	11.1168	1.03904e-28	9.28879e-26	1446.75	394.571
GS1-421I3.2	147.902	8.08685	0.729468	11.086	1.4677e-28	1.28158e-25	151.317	0.785714
TNFRSF10B	1039.45	1.32683	0.12032	11.0276	2.81426e-28	2.40152e-25	1173.41	639.429
ZNF280B	57.7577	2.52401	0.229877	10.9798	4.77952e-28	3.98793e-25	72.3651	16.2857
C3	3435.41	4.25019	0.38802	10.9535	6.39175e-28	5.2172e-25	4440.3	319
CORO1C	1340.77	1.90727	0.174908	10.9044	1.09818e-27	8.77304e-25	1687.87	583.214
ATP1A3	422.64	8.3014	0.761505	10.9013	1.13623e-27	8.8879e-25	591.095	2.57143
HHATL	2234.55	7.85041	0.723292	10.8537	1.91473e-27	1.46719e-24	2285.29	14.1429
MURC	60.3601	3.53629	0.326621	10.8269	2.56685e-27	1.92755e-24	71.381	8.78571
SLC15A4	641.343	1.9772	0.182662	10.8243	2.63982e-27	1.94348e-24	763	248.571
SLC9B2	92.2786	2.38286	0.220222	10.8203	2.7597e-27	1.99266e-24	118.063	30.1429
TUBB4A	1462.12	4.15512	0.387091	10.7342	7.03116e-27	4.98111e-24	1428.49	99.4286
MMAB	143.97	-1.03051	0.0962437	-10.7072	9.41168e-27	6.54408e-24	130.746	344.143
GLTP	257.18	-1.00557	0.0942042	-10.6744	1.34129e-26	8.9931e-24	235.778	615.071
RP11-4B16.4	573.63	2.41287	0.22602	10.6755	1.32537e-26	8.9931e-24	626.032	162.929
PVT1	236.745	3.14183	0.295379	10.6366	2.01335e-26	1.32623e-23	219.111	43.2143
NTSR2	267.232	9.18319	0.864135	10.627	2.23087e-26	1.44418e-23	389.143	0.714286
SCD	1714	3.36376	0.316809	10.6176	2.46752e-26	1.5549e-23	2342.35	267.643
RAP2B	855.941	1.78191	0.167835	10.617	2.48473e-26	1.5549e-23	923.175	368.857
TREM2	37.0318	4.04706	0.381441	10.6099	2.67904e-26	1.62242e-23	47.4603	3.42857
RP13-379O24.2	141.643	9.23316	0.870227	10.6101	2.67563e-26	1.62242e-23	172.302	0.357143
SERPINE2	1390.32	2.77491	0.262164	10.5846	3.5123e-26	2.09328e-23	1819.62	333.143
PLA2G7	72.3878	6.34625	0.600473	10.5687	4.16047e-26	2.44083e-23	101.603	1.57143
PRUNE2	7477.49	2.6647	0.25411	10.4864	9.97579e-26	5.76248e-23	9055.97	1763.93
TMEM164	382.58	-1.14297	0.109192	-10.4675	1.21785e-25	6.92825e-23	343.048	989.714
RAB42	236.109	4.5047	0.430671	10.4597	1.32238e-25	7.41063e-23	257.937	16
ABCA12	132.543	4.44676	0.425364	10.454	1.40462e-25	7.75579e-23	184.206	11.0714
ARL4C	579.26	2.58043	0.24712	10.442	1.59419e-25	8.67491e-23	702.381	162.786
LAPTM5	898.168	2.43555	0.233496	10.4308	1.79396e-25	9.62255e-23	1157.17	282.857
TMEM75	94.7148	3.11212	0.298625	10.4215	1.97854e-25	1.04632e-22	111.016	18.0714
CHRFAM7A	141.679	3.62956	0.348637	10.4107	2.21528e-25	1.15524e-22	177.397	18.8571
TBC1D24	802.614	-1.75459	0.168569	-10.4087	2.26258e-25	1.16374e-22	599.667	2659.5
DIRAS2	482.386	4.87536	0.469279	10.389	2.78154e-25	1.41133e-22	558.667	25.0714
RP1-140K8.5	198.355	4.92285	0.4747	10.3705	3.37923e-25	1.69173e-22	250.873	11.0714
AEN	258.277	1.55602	0.150218	10.3584	3.83408e-25	1.86959e-22	293.73	139.714
RP11-624A21.1	119.993	4.05976	0.39192	10.3587	3.82312e-25	1.86959e-22	155.73	12.7143
DNASE1	939.649	-1.66203	0.160524	-10.3538	4.02393e-25	1.93701e-22	717.333	3059.5
LGI3	416.862	6.44381	0.622803	10.3465	4.34191e-25	2.06362e-22	636.524	7.92857
LINC00906	134.183	5.36703	0.51934	10.3343	4.92844e-25	2.3131e-22	133.968	4.92857
BRINP2	114.382	5.38003	0.523002	10.2868	8.08049e-25	3.74566e-22	138.429	4.21429
QPCT	126.469	3.41673	0.332316	10.2816	8.53202e-25	3.90673e-22	181.921	22.0714
INHBB	102.942	3.72082	0.363663	10.2315	1.43264e-24	6.40372e-22	133.032	13.6429
DGCR5	598.787	5.09214	0.497655	10.2323	1.42149e-24	6.40372e-22	704.206	31.1429
CHRNA7	471.978	3.22075	0.314964	10.2258	1.52001e-24	6.71434e-22	577.365	87.5714
FLJ16779	787.714	5.13816	0.503	10.215	1.69831e-24	7.41472e-22	757.857	38.9286
BNC1	88.4487	4.45099	0.435828	10.2127	1.73903e-24	7.50522e-22	113.46	7.64286
LINC00475	43.0794	4.85586	0.475873	10.2041	1.90098e-24	8.1109e-22	45.2063	2.71429
RP3-510D11.1	626.036	2.38026	0.233345	10.2006	1.97065e-24	8.3137e-22	662.778	203.357
PSG8	210.051	6.90242	0.677951	10.1813	2.40322e-24	1.0026e-21	254.651	2.85714
SIGLEC10	65.7718	2.76011	0.271177	10.1782	2.48008e-24	1.02329e-21	80.381	16.2143
SIRPA	1925.72	1.80645	0.177853	10.157	3.08502e-24	1.24552e-21	2211.84	812.571
PSG1	213.602	7.05639	0.694675	10.1578	3.05809e-24	1.24552e-21	262.873	2.64286
SNCB	204.238	7.60601	0.749646	10.1461	3.44779e-24	1.37717e-21	266.571	1.64286
HSPB8	914.837	2.34614	0.231632	10.1287	4.11941e-24	1.62812e-21	1103.51	277.929
ITGAX	1487.75	3.79236	0.374668	10.1219	4.41607e-24	1.72719e-21	2149.38	191.643
RP11-715J22.6	74.1444	-2.14798	0.212551	-10.1057	5.21162e-24	2.01733e-21	50.2857	278.857
ERVV-2	242.303	10.1721	1.00738	10.0976	5.65938e-24	2.16829e-21	342.19	0.285714
WIPF1	882.066	1.14967	0.113896	10.094	5.87457e-24	2.22801e-21	1043.14	604.643
RP11-1110F20.1	74.647	2.70784	0.268392	10.0891	6.17319e-24	2.31785e-21	88.1111	18.6429
FAXC	280.022	2.71715	0.269712	10.0742	7.18118e-24	2.66962e-21	350.397	71.7143
TNIK	620.674	1.65668	0.165751	9.99499	1.60301e-23	5.90081e-21	698.19	293.429
GALNT5	79.8921	4.3429	0.434661	9.99146	1.66116e-23	6.05548e-21	94.7778	6
ASTN1	237.65	4.26059	0.426579	9.98782	1.72337e-23	6.22187e-21	276.619	19.5
MLPH	998.946	3.97648	0.398957	9.96719	2.1214e-23	7.58593e-21	1114.87	105
SLC41A2	243.115	1.78596	0.179474	9.95109	2.49424e-23	8.83501e-21	306.698	113.429
NPC1	1286.05	1.8881	0.190004	9.93717	2.86859e-23	1.00661e-20	1507.11	509.357
FECH	370.679	-1.78924	0.180309	-9.92316	3.30119e-23	1.14768e-20	282.27	1266.14
ARHGAP22	158.448	2.44408	0.246372	9.9203	3.39749e-23	1.17033e-20	193.159	50.0714
RP11-4B16.1	276.249	2.48637	0.25234	9.85325	6.63609e-23	2.26514e-20	303.556	73.9286
PLEKHO2	795.624	1.5818	0.160753	9.83995	7.57469e-23	2.56223e-20	960.524	435.643
MMP14	3489.63	2.32173	0.23682	9.80375	1.08484e-22	3.63683e-20	3607.92	963.5
BUB1	41.8837	4.15425	0.424075	9.79601	1.17119e-22	3.89156e-20	55.0476	4
IGDCC4	239.333	3.60521	0.368252	9.79008	1.24195e-22	4.09049e-20	270.841	34.4286
ETNK2	213.602	-1.90291	0.195162	-9.75042	1.83702e-22	5.99779e-20	160.54	764.643
CABP1	65.2013	-2.7567	0.282846	-9.7463	1.91317e-22	6.19257e-20	35.4286	312.857
SCARB1	1872.94	3.37862	0.346722	9.74447	1.94798e-22	6.25134e-20	2363.86	307.286
SLC19A2	848.053	2.18195	0.224541	9.71739	2.54217e-22	8.08905e-20	1067.56	300.286
RP11-567E21.3	51.5243	6.989	0.719321	9.7161	2.57444e-22	8.12291e-20	58.3175	0.714286
RP11-161M6.2	686.524	4.39509	0.452482	9.7133	2.64623e-22	8.27982e-20	769.111	59.2143
CREB5	793.722	2.01324	0.20775	9.69065	3.30416e-22	1.0253e-19	929.302	313.714
TM6SF1	158.386	3.18456	0.328874	9.68323	3.55316e-22	1.09353e-19	187.238	28.3571
EDA2R	143.759	2.4997	0.258965	9.65265	4.79016e-22	1.45132e-19	164.825	42.6429
FCGR3A	302.236	3.25509	0.337225	9.65259	4.79301e-22	1.45132e-19	396.619	51.7857
ABCA1	1728.97	1.7401	0.18036	9.6479	5.0171e-22	1.50702e-19	2248.49	854.286
GM2A	1351.64	2.52414	0.262286	9.62364	6.35438e-22	1.89355e-19	1632.38	397.143
ARHGAP9	187.725	2.04196	0.212283	9.61907	6.64302e-22	1.96398e-19	227.73	76.5
CDKN2B-AS1	74.9338	3.37808	0.351734	9.60407	7.68455e-22	2.25415e-19	90	12.2857
DAK	363.799	-1.32664	0.138366	-9.58788	8.99094e-22	2.61692e-19	315.079	981.643
TUBB3	129.691	5.04292	0.528731	9.53778	1.45926e-21	4.21468e-19	157.27	7.5
CFAP61	380.893	5.01938	0.526467	9.53408	1.51219e-21	4.33423e-19	512	19.6429
CREB3L1	667.902	3.5065	0.36861	9.51278	1.85636e-21	5.28037e-19	667.778	77.6429
GPR150	47.3508	5.21682	0.548614	9.50909	1.92334e-21	5.42976e-19	60.0952	1.92857
IFNAR2	252.007	1.4645	0.154204	9.49716	2.15693e-21	6.04375e-19	291.079	149.286
LAIR1	241.215	2.06916	0.217939	9.49421	2.21889e-21	6.1713e-19	286.159	92.4286
CD68	671.708	2.32479	0.245002	9.48886	2.3358e-21	6.40163e-19	890.794	225.429
SOX11	366.741	6.44595	0.67931	9.48897	2.33327e-21	6.40163e-19	410.492	5.35714
TMED6	205.217	3.79112	0.399756	9.4836	2.45664e-21	6.68403e-19	241.349	19.8571
SLC1A4	283.235	1.56047	0.165227	9.4444	3.57447e-21	9.65545e-19	339.524	153.429
AC103563.8	4.5123	-3.33323	0.35319	-9.4375	3.81764e-21	1.02386e-18	1.85714	24
RP11-414J4.2	99.9025	8.28901	0.880128	9.41797	4.59896e-21	1.22466e-18	119.873	0.5
ABR	4723.43	2.2544	0.239482	9.41364	4.79227e-21	1.26715e-18	5285.41	1549.86
PSG7	141.313	6.95048	0.739179	9.40297	5.30429e-21	1.39273e-18	171.016	1.92857
LINC01443	104.943	5.20206	0.554343	9.3842	6.33963e-21	1.64161e-18	129.54	4.07143
SOX8	260.495	3.95044	0.421387	9.37486	6.92686e-21	1.78139e-18	317.349	30
PSG6	165.835	6.14134	0.655376	9.37071	7.20452e-21	1.84019e-18	195.619	3.64286
CTSK	3990.88	5.39307	0.576697	9.35166	8.62853e-21	2.18902e-18	4141.84	137.071
TRPA1	138.419	2.94088	0.314598	9.34805	8.92753e-21	2.24968e-18	137.175	23.7143
CD84	364.032	2.50218	0.268709	9.31186	1.25615e-20	3.14432e-18	451.952	104.571
APBB1IP	231.46	2.38031	0.255787	9.30583	1.32955e-20	3.30601e-18	276.984	73.3571
THBS2	1759.12	3.03529	0.326469	9.29732	1.44028e-20	3.55778e-18	2495.49	403.071
TYROBP	148.49	2.25672	0.242989	9.28735	1.58177e-20	3.88175e-18	191.651	50.5
CDKN2C	173.375	2.25525	0.243321	9.26864	1.8854e-20	4.59683e-18	190.159	54.7857
MAP7D3	175.401	1.39223	0.150494	9.25102	2.22351e-20	5.38619e-18	215.889	104.643
GAS2L3	270.45	2.50795	0.272002	9.22034	2.96146e-20	7.12783e-18	296.587	74.2857
TRIM67	140.336	4.49044	0.487186	9.2171	3.05244e-20	7.30001e-18	174.492	10.4286
RP13-395E19.4	22.5279	6.53479	0.710661	9.19536	3.73742e-20	8.88158e-18	26.9841	0.357143
MBP	2072.82	1.77764	0.193402	9.19141	3.87738e-20	9.15621e-18	2385.67	916.214
KCNF1	204.199	5.64144	0.614566	9.17955	4.32884e-20	1.01584e-17	433.111	7
PSG10P	52.8076	8.44466	0.920127	9.17771	4.40343e-20	1.02693e-17	61.9365	0.142857
TMEM37	342.497	-1.57965	0.172219	-9.17232	4.62945e-20	1.07297e-17	279.571	1056.43
CDKN2B	75.8605	2.62977	0.286947	9.16464	4.97116e-20	1.14511e-17	92.127	20
ASAH1	5323.31	2.29345	0.25051	9.1551	5.43086e-20	1.24337e-17	6463.41	1621.71
GLIPR2	161.968	1.86718	0.204055	9.15037	5.67389e-20	1.29114e-17	205.444	75.2143
KIF1A	770.474	5.21787	0.570305	9.14925	5.73283e-20	1.29669e-17	1055.08	36.8571
SDS	54.619	3.36284	0.367839	9.14216	6.12196e-20	1.37641e-17	71.2063	8.92857
NRAP	25.2324	4.05716	0.443892	9.13996	6.2473e-20	1.39147e-17	30.2698	2.42857
SMIM5	294.349	-1.91271	0.209275	-9.13969	6.26303e-20	1.39147e-17	197.587	1059.36
EEF2K	1316.43	1.80505	0.197525	9.13836	6.34077e-20	1.40045e-17	1622.1	615
MMP9	127.144	4.92414	0.53913	9.13349	6.63272e-20	1.45637e-17	200.841	7.57143
GRN	5456.42	2.65951	0.291475	9.12433	7.21813e-20	1.57569e-17	7358.97	1476.57
HIST3H2A	64.946	3.42729	0.375736	9.12152	7.4075e-20	1.60768e-17	89.8889	10.5
CYP17A1	2381.48	4.56831	0.501229	9.11422	7.92387e-20	1.70987e-17	3585	171.286
EPHA5	293.061	5.8641	0.643941	9.10657	8.5026e-20	1.82427e-17	383.46	7.42857
HTR7	22.7022	2.1502	0.236769	9.08144	1.07146e-19	2.2858e-17	26.619	8.42857
KIF3C	212.405	1.50396	0.165677	9.07772	1.10874e-19	2.35196e-17	248.683	119.429
SELPLG	147.45	2.14966	0.236977	9.07119	1.1772e-19	2.48316e-17	182.984	55
SHANK1	845.245	5.12549	0.565582	9.06232	1.27702e-19	2.67867e-17	911.19	45.5714
SLC35F6	1404.21	1.70723	0.188427	9.06045	1.29913e-19	2.70991e-17	1622.08	640.714
PSG11	69.7607	6.95465	0.768164	9.0536	1.38333e-19	2.86962e-17	82.8571	0.928571
PLA2G16	796.849	1.98263	0.219214	9.04426	1.50684e-19	3.10865e-17	1013.25	316.857
ORC5	308.289	2.58076	0.285466	9.04049	1.55966e-19	3.20004e-17	412.984	86.3571
ESRRB	197.745	-3.45548	0.382408	-9.03612	1.62335e-19	3.31261e-17	80.1905	1162.93
LINC01315	120.511	3.53004	0.390767	9.0336	1.66108e-19	3.37128e-17	137.381	17.2857
RASD2	538.282	4.87465	0.53985	9.02965	1.72225e-19	3.47662e-17	711.111	33.3571
NKAIN4	671.991	3.91369	0.435179	8.99327	2.3999e-19	4.81866e-17	621.286	76.3571
CCBL1	68.287	-1.01268	0.112684	-8.98688	2.54353e-19	5.07989e-17	62.6508	166.071
PSG3	153.62	6.27112	0.69953	8.96475	3.10978e-19	6.14542e-17	181.19	2.78571
INHBE	211.093	6.6847	0.746335	8.9567	3.34525e-19	6.57613e-17	327.048	3.57143
PIK3R5	205.276	2.05682	0.229728	8.95329	3.45046e-19	6.74763e-17	246.175	82.5
CMTM4	1216.35	-1.42714	0.159469	-8.94936	3.5754e-19	6.95573e-17	1015.41	3504.71
PLA1A	462.622	3.07102	0.343882	8.93045	4.24277e-19	8.21152e-17	463.302	70.0714
CELF2	1254.43	2.9341	0.329287	8.91045	5.08244e-19	9.78617e-17	1604.43	277.357
DLL3	73.2694	8.37292	0.940851	8.89931	5.61974e-19	1.07655e-16	100.063	0.357143
RP3-395M20.7	58.2715	3.51794	0.396389	8.87497	6.99543e-19	1.33329e-16	67.6825	8.28571
VAT1	2625.96	1.91912	0.216357	8.87012	7.3067e-19	1.38558e-16	3258.11	1117.21
ADAMTS14	180.054	4.54391	0.512344	8.86886	7.39004e-19	1.39434e-16	205.27	14.5
SIGLEC8	23.9753	3.52978	0.398906	8.84863	8.85981e-19	1.6633e-16	30.3968	3.5
PCA3	985.474	2.56376	0.28995	8.84209	9.39412e-19	1.75483e-16	1070.71	219.857
AC008991.1	39.8082	6.53081	0.740003	8.82538	1.09085e-18	2.02763e-16	39.9365	0.571429
ITGAD	136.274	6.42848	0.729566	8.81137	1.23621e-18	2.2865e-16	175.619	2.57143
GNG7	244.632	-1.75575	0.199367	-8.80663	1.28967e-18	2.37369e-16	184.698	801.571
NT5DC3	465.364	1.83445	0.208694	8.79013	1.49391e-18	2.7362e-16	570.222	220.571
RP11-43D4.3	63.927	2.61091	0.297367	8.78009	1.6334e-18	2.97715e-16	75.5079	16.9286
GCNT3	339.767	2.90621	0.331198	8.77484	1.7115e-18	3.10443e-16	393.873	76.4286
VIM	7023.09	1.51475	0.17278	8.76691	1.83632e-18	3.31482e-16	8793.29	4066.86
FAM124A	1223.08	3.04482	0.348193	8.74462	2.23762e-18	4.0199e-16	1528.89	249.643
NCKAP1L	386.677	2.06939	0.236784	8.73954	2.34057e-18	4.18482e-16	481.016	149.643
MSANTD3	225.973	1.42827	0.16446	8.68461	3.80042e-18	6.76277e-16	257.698	127.429
MFSD4	575.798	-2.92414	0.336807	-8.68196	3.88995e-18	6.88943e-16	306.365	2973.71
RUNX3	163.967	2.28977	0.263896	8.67679	4.07084e-18	7.17595e-16	193.286	52.8571
CAV2	406.345	1.83925	0.211989	8.67617	4.09327e-18	7.18178e-16	506.619	183.357
KCNK9	108.583	6.00461	0.693056	8.66396	4.5564e-18	7.95717e-16	153.635	2.85714
SCRT1	565.524	5.82357	0.672515	8.65939	4.74289e-18	8.24451e-16	679.206	18
ME1	108.859	2.13469	0.246787	8.64994	5.15244e-18	8.91514e-16	140	43.2857
IKZF1	368.475	2.01462	0.232924	8.64924	5.18444e-18	8.92937e-16	434.143	147.929
RP11-582J16.4	272.276	2.62899	0.304028	8.64719	5.27816e-18	9.04927e-16	327.984	71.3571
LINC01567	683.739	3.73349	0.431971	8.64292	5.47945e-18	9.35167e-16	692.667	64.6429
ROR2	295.106	2.60731	0.302339	8.6238	6.47705e-18	1.10043e-15	363.016	82.5714
BTN2A2	217.159	1.11938	0.130024	8.60907	7.36576e-18	1.24578e-15	252.429	151.357
MRPS6	512.681	-1.69099	0.196565	-8.60271	7.78561e-18	1.31088e-15	406.333	1714.64
NPTX2	79.0953	5.92195	0.688666	8.59916	8.03046e-18	1.34009e-15	126.603	2.64286
C10orf128	202.903	2.65719	0.309005	8.5992	8.02744e-18	1.34009e-15	267.46	55.8571
C1QB	564.645	2.66284	0.309716	8.59768	8.13472e-18	1.35148e-15	742.984	150.929
SLC38A8	217.55	7.9664	0.926809	8.59552	8.28893e-18	1.37103e-15	327.381	1.35714
HMOX1	1052.3	2.63715	0.307114	8.5869	8.93499e-18	1.45428e-15	1407.71	277.143
TAGAP	138.568	1.88147	0.219113	8.58674	8.94718e-18	1.45428e-15	179.667	59.8571
RP5-1092A11.5	18.4046	6.74105	0.785037	8.58692	8.93348e-18	1.45428e-15	25.1587	0.214286
THRB-AS1	25.2314	-1.76697	0.205775	-8.5869	8.93441e-18	1.45428e-15	17.3968	78.2857
HK2	286.108	3.03871	0.354527	8.57116	1.02447e-17	1.65801e-15	370.46	62.1429
BMP2K	780.883	1.21378	0.141676	8.56728	1.05961e-17	1.70752e-15	915.873	515.214
EVL	2138.43	1.75739	0.205169	8.56554	1.07569e-17	1.72603e-15	2520.1	1036.79
SLC20A1	2368.87	2.77965	0.324703	8.56061	1.12276e-17	1.79388e-15	2927.21	579
BAIAP3	147.095	-2.17285	0.25391	-8.55756	1.15282e-17	1.8341e-15	97.7778	608.714
CD53	200.416	2.06378	0.241635	8.54093	1.33148e-17	2.1094e-15	257.667	80.2143
NCF2	106.8	2.02242	0.237056	8.53141	1.44571e-17	2.28076e-15	134.46	41.1429
RP11-285G1.2	20.6713	-2.2626	0.265245	-8.53023	1.46052e-17	2.29448e-15	12.2698	81.9286
CD180	57.4288	2.39808	0.281163	8.52916	1.47413e-17	2.29665e-15	74.4921	17.7857
RP11-216P6.2	15.0322	4.01888	0.471169	8.52959	1.46865e-17	2.29665e-15	18.3651	1.57143
ADCY2	133.94	2.98184	0.349944	8.52091	1.58308e-17	2.45619e-15	149.317	25.0714
RP11-32B5.8	72.5498	6.88958	0.810075	8.50487	1.81792e-17	2.80894e-15	95.127	1.07143
FBXO32	1123.93	2.43938	0.286973	8.50039	1.88959e-17	2.90772e-15	1303.4	320.857
HIST1H2AM	23.552	2.57345	0.302857	8.49726	1.94115e-17	2.97488e-15	32.3968	6.57143
SLC4A10	50.3968	5.46304	0.643602	8.48822	2.09821e-17	3.2025e-15	70.9683	2.14286
TMEFF1	33.8191	4.32134	0.509361	8.48385	2.17868e-17	3.31186e-15	31.0317	2.64286
OLFML2B	282.235	2.89358	0.341142	8.48204	2.21273e-17	3.35006e-15	385.698	68.0714
DOCK2	389.036	1.9891	0.234541	8.48082	2.23608e-17	3.37181e-15	489.635	165.857
2020-09-03	377.467	4.6871	0.553331	8.47071	2.439e-17	3.66309e-15	497.175	23.1429
CDKN1A	1181.21	2.0409	0.24144	8.45305	2.83797e-17	4.21175e-15	1390.02	493.5
NKPD1	87.3246	2.95636	0.349728	8.45329	2.83196e-17	4.21175e-15	98.1587	17.7143
P2RX5	30.8885	3.30859	0.391804	8.4445	3.0534e-17	4.51362e-15	41.0794	5.71429
C1orf216	104.93	1.24614	0.147959	8.42219	3.69509e-17	5.44076e-15	126.571	70.0714
AC006019.4	181.429	3.26778	0.388331	8.41493	3.93121e-17	5.76583e-15	217.54	27.9286
TGM5	215.47	7.15617	0.850485	8.41422	3.95501e-17	5.77816e-15	319.778	2.07143
LINC00887	87.2996	3.83017	0.455236	8.41359	3.97654e-17	5.77889e-15	92.0635	10.1429
AC104777.2	31.386	7.82238	0.929764	8.4133	3.98629e-17	5.77889e-15	35.7778	0.0714286
FJX1	486.209	3.42201	0.407226	8.40321	4.34446e-17	6.2739e-15	510.206	80.1429
RP11-21K12.2	156.139	1.81441	0.215991	8.40038	4.45032e-17	6.40215e-15	168.238	66.0714
SIRPB1	55.3287	2.21841	0.264114	8.39943	4.48656e-17	6.42965e-15	63.4286	18.7143
SQSTM1	5663.06	2.01605	0.240089	8.39711	4.57608e-17	6.51262e-15	7165.81	2279.93
AC004603.4	72.2316	6.51881	0.776323	8.39703	4.57915e-17	6.51262e-15	87.5397	1.35714
SFRP4	474.389	3.33864	0.39762	8.39657	4.59716e-17	6.51357e-15	573.016	68.4286
FAIM3	74.1182	2.39116	0.284933	8.39199	4.78001e-17	6.74718e-15	94.619	24.3571
CTSZ	1075.14	1.6749	0.199804	8.38274	5.17092e-17	7.27163e-15	1335.56	541.643
C4orf50	96.7188	4.85671	0.579443	8.38169	5.21742e-17	7.30964e-15	141.984	5.78571
ANO4	61.1231	3.29526	0.393363	8.37715	5.42257e-17	7.54078e-15	58.127	8.21429
DMBX1	139.089	7.4784	0.892673	8.37754	5.40456e-17	7.54078e-15	193.349	1.28571
ASPM	82.0952	3.43304	0.410859	8.35576	6.50146e-17	8.97464e-15	112.635	14
KCNJ4	144.791	5.55828	0.66537	8.35367	6.61761e-17	9.10152e-15	170.143	5
SLC45A2	333.663	5.26646	0.630808	8.34876	6.89862e-17	9.45337e-15	493.905	15.4286
CACNA2D3	64.1638	-2.20164	0.264012	-8.33917	7.48109e-17	1.02025e-14	39.9048	242.071
RPS5P2	21.6952	-2.00728	0.240713	-8.33888	7.49961e-17	1.02025e-14	15.4444	86.0714
SIGLEC9	44.1737	2.16546	0.259736	8.33717	7.60873e-17	1.03135e-14	53.9048	15.9286
ADAMDEC1	17.9092	5.88907	0.706407	8.33665	7.64224e-17	1.03217e-14	25.0952	0.5
RP11-20I20.4	179.952	2.45722	0.294924	8.33171	7.96839e-17	1.07236e-14	203.889	55.7857
RP11-573D15.8	61.955	-3.35852	0.403357	-8.32642	8.33206e-17	1.1173e-14	24.5556	327.286
MKI67	217.296	3.16274	0.3799	8.3252	8.41873e-17	1.1249e-14	296.905	42.5714
DTNA	267.106	1.61116	0.193643	8.32025	8.77777e-17	1.16459e-14	324.46	136.643
PLXNC1	458.041	1.6899	0.203103	8.32043	8.76424e-17	1.16459e-14	532.794	225.5
PXDC1	468.48	1.48653	0.178726	8.31738	8.99267e-17	1.1889e-14	555.063	269
PALM2	262.838	2.10734	0.253426	8.3154	9.14408e-17	1.20468e-14	314.968	98.8571
RASA3	439.047	1.15165	0.138552	8.31207	9.40482e-17	1.23469e-14	511.762	308.286
PNLIPRP3	101.028	8.01573	0.964727	8.3088	9.66745e-17	1.26475e-14	133.794	0.571429
TOP2A	94.1195	3.4044	0.409944	8.30455	1.00198e-16	1.3063e-14	134.746	16
CHRM4	46.1087	6.07769	0.73194	8.30354	1.01056e-16	1.31292e-14	63.7619	1.28571
HCK	108.454	1.90515	0.229737	8.29276	1.10651e-16	1.4277e-14	136.413	47.7143
KCNQ4	183.136	2.95778	0.356817	8.28936	1.13859e-16	1.46406e-14	219.635	37.7143
PART1	578.049	4.31893	0.521094	8.2882	1.14979e-16	1.47342e-14	621.556	46.7143
COL8A2	188.314	2.47703	0.299661	8.2661	1.38407e-16	1.76761e-14	233.508	60
CDH17	237.998	4.4657	0.540528	8.26174	1.43559e-16	1.82719e-14	264.825	8.71429
PLD4	94.357	1.60612	0.194487	8.25824	1.47841e-16	1.87534e-14	106.397	47.6429
CTD-3128G10.7	24.9086	4.12858	0.500165	8.25444	1.52615e-16	1.92937e-14	30.9365	2.42857
KCNQ5	77.2465	4.16138	0.504198	8.25347	1.53863e-16	1.93862e-14	75.8095	6.07143
IL2RB	134.198	2.34589	0.284252	8.25287	1.5463e-16	1.94177e-14	168.857	44.5
INHBA	402.866	2.72963	0.330887	8.24945	1.59132e-16	1.98502e-14	514.635	108.071
ZNF385A	264.475	1.42901	0.173249	8.24828	1.60688e-16	1.9978e-14	308.619	155
RP11-617F23.1	332.919	-1.61941	0.196375	-8.24654	1.63043e-16	2.02039e-14	251.698	1022.5
SASH3	133.055	1.82161	0.220931	8.24512	1.6499e-16	2.03779e-14	165.778	62.2857
AMER1	256.372	-1.06067	0.128723	-8.23994	1.72303e-16	2.12114e-14	221.905	605.286
CLSPN	36.7552	2.84897	0.345834	8.23796	1.75178e-16	2.14639e-14	42.9365	8.07143
LINC01094	25.0197	2.52729	0.306794	8.23774	1.75498e-16	2.14639e-14	31.5556	6.64286
STAMBPL1	149.334	1.55977	0.189794	8.21822	2.06544e-16	2.51789e-14	175.111	83.2857
TPP1	4232.38	1.69967	0.206831	8.21767	2.07489e-16	2.52122e-14	4981.11	1861.21
ZNF365	41.4964	3.20809	0.390504	8.21527	2.1168e-16	2.54742e-14	49.4286	7.21429
NR1I3	30.4284	-2.06314	0.251123	-8.21566	2.10995e-16	2.54742e-14	18.1429	94.5714
MELK	14.929	4.09021	0.497863	8.21555	2.112e-16	2.54742e-14	20.9841	1.57143
ACSF2	512.789	-2.03738	0.248261	-8.20661	2.27528e-16	2.72939e-14	367.127	1830
CCL18	48.0518	5.42512	0.661341	8.20321	2.34061e-16	2.79882e-14	299.111	1.92857
TNIP3	45.3064	5.24307	0.63929	8.20139	2.37617e-16	2.83232e-14	59.3175	1.78571
RPP25	417.771	2.71691	0.331461	8.19677	2.46933e-16	2.93404e-14	549.619	112.357
ALOX5	221.827	2.11427	0.258305	8.1852	2.7186e-16	3.22005e-14	276.587	90.2143
KCNQ1	246.214	-1.89683	0.231783	-8.18367	2.75323e-16	3.2508e-14	176.016	908.857
MTHFD1L	213.833	1.24254	0.15186	8.18211	2.78928e-16	3.28304e-14	248.46	145.929
KCNV1	28.011	4.2605	0.520756	8.18138	2.8062e-16	3.29263e-14	38.8889	2.5
HIST1H1B	47.5507	3.0509	0.373155	8.17596	2.93519e-16	3.43326e-14	67.3968	10.4286
MYC	427.884	2.19973	0.269171	8.17223	3.02739e-16	3.5301e-14	496.27	153.214
ZMAT3	1439.39	1.84609	0.225989	8.16894	3.11112e-16	3.61651e-14	1702.38	632.286
ANKRD30B	278.442	6.69091	0.819588	8.16375	3.24774e-16	3.76367e-14	344.698	3.35714
PLCG2	637.146	-1.23776	0.151642	-8.16239	3.28451e-16	3.79457e-14	562.952	1661.57
PLEK	174.558	2.04676	0.250798	8.16101	3.32229e-16	3.82644e-14	217.524	68.7857
PATL1	794.937	1.08043	0.132404	8.16013	3.34656e-16	3.84261e-14	924.222	567.143
GTF3A	336.003	1.17298	0.143773	8.15854	3.39094e-16	3.8699e-14	386.317	224.643
TM4SF19	135.491	4.58273	0.561705	8.15861	3.38915e-16	3.8699e-14	246.984	8.57143
ARHGAP11A	59.3728	2.32638	0.285319	8.15358	3.533e-16	4.0198e-14	74.7937	18.1429
CD22	217.854	2.72878	0.335032	8.14484	3.79773e-16	4.30796e-14	269.905	53.5
CCDC136	283.402	3.94725	0.485141	8.13629	4.0757e-16	4.60935e-14	375.508	33.1429
PI4K2A	786.136	1.41879	0.174475	8.13179	4.22988e-16	4.76935e-14	899.841	451
NRP2	1158.08	2.0719	0.254835	8.13037	4.27986e-16	4.81125e-14	1428.29	441.857
TNFSF14	35.3812	2.84323	0.349802	8.12812	4.36016e-16	4.88689e-14	45.1111	8.07143
SYT14	250.54	3.79482	0.467357	8.11974	4.67184e-16	5.22064e-14	296.746	25.0714
FAM171B	201.02	2.01986	0.249025	8.11109	5.01675e-16	5.58943e-14	260.571	82.2857
SCEL	73.4683	6.22063	0.767093	8.10935	5.08899e-16	5.65314e-14	94.746	1.85714
SELENBP1	409.843	-1.54872	0.191049	-8.10643	5.21285e-16	5.77365e-14	342.905	1254.64
C15orf48	45.8034	4.53249	0.55935	8.10314	5.35581e-16	5.91454e-14	67.0952	3.57143
MSR1	285.46	2.15324	0.265984	8.09537	5.70924e-16	6.27946e-14	366.333	105.071
MFSD2A	50.0745	3.24525	0.400888	8.09514	5.7197e-16	6.27946e-14	60.619	9.14286
CATSPERG	1564.14	4.6783	0.578003	8.09389	5.77868e-16	6.32572e-14	2206.71	104.571
RPL7AP15	7.09516	-1.71616	0.212116	-8.09065	5.93484e-16	6.47778e-14	5.34921	21.5
CENPF	144.731	3.22376	0.398632	8.08705	6.11285e-16	6.65273e-14	204.46	27.9286
FYB	404.697	2.0157	0.249515	8.07846	6.55881e-16	7.11745e-14	505.571	166.286
COLCA1	241.455	-2.1475	0.265874	-8.07713	6.63078e-16	7.17481e-14	156.429	926.571
CDKN2A	51.285	3.34193	0.413847	8.07528	6.73225e-16	7.26367e-14	53.1587	7.42857
GSG2	16.9348	2.78607	0.345322	8.06803	7.14415e-16	7.686e-14	20.0952	4
MET	1721.34	1.52862	0.189565	8.06385	7.39255e-16	7.93052e-14	1874.13	838.286
CSF3R	218.06	1.88146	0.233623	8.05342	8.05125e-16	8.59081e-14	241.159	92.9286
TNFSF9	46.3764	3.65608	0.45398	8.05338	8.05381e-16	8.59081e-14	50.3175	6.71429
SYT11	408.603	1.51591	0.18828	8.05138	8.18685e-16	8.70798e-14	507.206	231.571
PTGFRN	724.918	1.35145	0.16788	8.05008	8.27383e-16	8.75091e-14	815.73	436.357
SLC1A3	133.189	2.50198	0.31134	8.03616	9.2695e-16	9.77646e-14	154.238	36.2143
PALM2-AKAP2	381.182	2.02487	0.252006	8.035	9.3576e-16	9.84173e-14	484.492	159.929
ALAD	487.774	-1.20299	0.149729	-8.03448	9.3973e-16	9.85588e-14	445.19	1224.36
CD96	68.5158	2.34276	0.291699	8.03145	9.63239e-16	1.00743e-13	86.3968	22.7143
SYP	31.9538	-1.59622	0.198867	-8.02657	1.00235e-15	1.04542e-13	25.7937	98.1429
RP11-16N11.2	18.414	-1.45521	0.181385	-8.02274	1.03412e-15	1.07557e-13	14.3492	51.0714
RPS10P28	55.4845	6.04107	0.753079	8.02184	1.04177e-15	1.08053e-13	69.1111	1.35714
PARVG	312.775	1.93174	0.241024	8.01472	1.1039e-15	1.14183e-13	360.175	135
CD300A	58.4182	2.11426	0.263875	8.01236	1.12529e-15	1.16075e-13	72.4444	23.2857
ATP1A1	5655.97	-1.89567	0.236727	-8.00785	1.16735e-15	1.20083e-13	4430.13	20495.9
LMAN1L	41.1434	5.61413	0.701446	8.00365	1.20781e-15	1.23906e-13	47.2222	1.35714
CD6	105.263	2.14499	0.268387	7.99216	1.32592e-15	1.35653e-13	128.381	39.2143
AGPAT6	1456.01	1.474	0.184456	7.99105	1.3379e-15	1.36245e-13	1552.29	768.143
FAM196B	292.154	2.67998	0.335377	7.99096	1.33897e-15	1.36245e-13	360.889	78
CD3E	93.2642	2.15551	0.269816	7.98881	1.36243e-15	1.38257e-13	117.571	35.2143
STARD8	458.546	-1.38165	0.172958	-7.98835	1.3676e-15	1.38408e-13	392.444	1343
ATP1A1-AS1	114.415	-1.59551	0.199886	-7.9821	1.43869e-15	1.45211e-13	87.8095	350.929
EPHB1	428.563	3.10297	0.388761	7.98169	1.44346e-15	1.45301e-13	498.413	74.8571
C12orf49	2460.2	2.29826	0.288006	7.97988	1.46471e-15	1.47047e-13	2755.71	793.429
SERPINE1	863.077	3.5278	0.442266	7.97664	1.50374e-15	1.50562e-13	1154.95	138.643
ST8SIA4	140.529	2.02712	0.254207	7.97427	1.53288e-15	1.53071e-13	176.317	56.5
RP11-361H10.5	19.4804	-2.48475	0.311624	-7.97353	1.54202e-15	1.53576e-13	11.4127	85.3571
DTL	27.1537	3.25186	0.40841	7.96224	1.68949e-15	1.67818e-13	37.7143	4.85714
CNR1	86.7326	3.57255	0.448782	7.96055	1.71273e-15	1.69678e-13	104.651	12.4286
LYZ	306.099	2.72282	0.342094	7.95926	1.73068e-15	1.71005e-13	406.667	82.5714
CD300LF	20.6844	2.43535	0.306035	7.95775	1.75189e-15	1.72646e-13	25.873	6.21429
ARL4D	101.811	-1.64606	0.206874	-7.95684	1.76491e-15	1.73474e-13	81.3492	318.571
C1QC	640.581	2.40926	0.303249	7.94482	1.94478e-15	1.90654e-13	843.206	202.714
CRISPLD1	99.9416	2.62672	0.330775	7.94109	2.00414e-15	1.95962e-13	143.143	28.9286
IKZF3	271.704	2.22546	0.280589	7.93138	2.16719e-15	2.11355e-13	335.556	95
GAL3ST4	98.6568	1.75808	0.221755	7.92802	2.22671e-15	2.16597e-13	120.762	45
SYT7	126.418	-2.7272	0.344247	-7.92222	2.33314e-15	2.26363e-13	65.6984	613.929
RP11-298I3.1	13.1641	-1.5896	0.200776	-7.91725	2.42823e-15	2.34982e-13	10.1429	40.2143
EFR3B	435.447	2.6108	0.329804	7.9162	2.44876e-15	2.36359e-13	490.556	108.143
RGS20	91.6164	4.23627	0.535356	7.913	2.51265e-15	2.41904e-13	82.4762	7.5
MRGPRE	116.333	5.75147	0.727125	7.90988	2.57641e-15	2.47408e-13	170.73	3.14286
OSCAR	26.6576	2.37287	0.300174	7.90496	2.68013e-15	2.56711e-13	30.7302	8.14286
LCP1	595.451	2.06958	0.261862	7.90331	2.71601e-15	2.59486e-13	784.952	243.143
CD63	2404.2	1.70665	0.216019	7.90046	2.77867e-15	2.64799e-13	3104.79	1179.43
SLC8A2	159.659	6.06856	0.768655	7.89503	2.90243e-15	2.75893e-13	191	4
PSG5	71.4597	5.51696	0.699166	7.89077	3.00316e-15	2.84747e-13	86.0159	2.35714
RP11-442O1.3	23.1377	-2.60484	0.330186	-7.88899	3.04637e-15	2.88116e-13	12.746	96.1429
CTSS	420.715	2.37851	0.301528	7.88821	3.06563e-15	2.8921e-13	558.635	137.571
BTK	83.6157	2.53065	0.32103	7.88289	3.19904e-15	3.01038e-13	98.0635	22.3571
TTC39A	658.556	2.05256	0.260406	7.88216	3.21767e-15	3.02035e-13	765.286	240.143
CD276	643.259	1.49136	0.189233	7.88109	3.24538e-15	3.03876e-13	756.333	357.857
LCP2	256.516	1.78069	0.226012	7.87876	3.30652e-15	3.08831e-13	315.016	117.786
RRAGC	439.701	1.64301	0.20871	7.87224	3.48347e-15	3.23974e-13	553.127	221.214
GPT2	210.343	-1.48471	0.188603	-7.87215	3.48591e-15	3.23974e-13	172.476	621.714
RPL34-AS1	10.367	-1.97748	0.251482	-7.8633	3.74143e-15	3.46863e-13	7.12698	33.8571
SLC7A11	87.0355	3.39169	0.431924	7.85253	4.07736e-15	3.77076e-13	118.889	12.6429
CRACR2A	85.494	1.54031	0.19619	7.85113	4.123e-15	3.80359e-13	106.127	47.1429
SOD2	11324.4	2.25784	0.287597	7.85071	4.13679e-15	3.80696e-13	14057.6	3866.14
ADAMTS17	98.3189	-1.86407	0.237479	-7.8494	4.18029e-15	3.83759e-13	70.8095	340
LSP1	218.319	1.9634	0.250791	7.82883	4.92444e-15	4.50971e-13	280.111	94.7143
AC007405.4	6.86371	-1.68995	0.215974	-7.8248	5.08483e-15	4.64526e-13	5.06349	22.6429
CHAD	105.831	-2.15539	0.275608	-7.8205	5.26118e-15	4.7947e-13	71.0159	378.643
NPC2	1069.53	1.70977	0.218749	7.81613	5.44704e-15	4.95205e-13	1414.11	541.5
IL7R	277.003	2.69422	0.344752	7.81495	5.49853e-15	4.98679e-13	352.127	73.3571
GPT	184.011	-2.11334	0.270647	-7.80849	5.78791e-15	5.2366e-13	123.508	693.714
PSAP	20866.8	1.81707	0.232789	7.80565	5.9195e-15	5.34278e-13	26773.4	9512.93
ANGPTL2	1115.41	2.26995	0.291079	7.79841	6.2693e-15	5.64492e-13	1280.35	359.571
GPR176	217.947	1.44102	0.18485	7.79562	6.40909e-15	5.75699e-13	257.095	128.571
RP11-834C11.4	188.052	-1.28153	0.164414	-7.79454	6.46424e-15	5.79267e-13	164.413	527.929
RP11-42I10.1	13.0037	2.89228	0.371221	7.79127	6.63385e-15	5.93051e-13	15.1746	2.71429
SCG2	46.515	4.45309	0.572023	7.78482	6.98143e-15	6.22641e-13	58.1429	3.5
FTH1	13783	1.64096	0.210996	7.77719	7.41509e-15	6.5975e-13	16545	6724.5
NNMT	390.284	3.01357	0.387549	7.77597	7.4871e-15	6.64582e-13	493.762	87.1429
RP5-1048B16.1	25.6546	3.51131	0.451609	7.7751	7.53877e-15	6.6759e-13	29.5238	3.21429
IL4I1	73.188	2.51316	0.324238	7.75098	9.11839e-15	8.05572e-13	93.8413	22.5714
JAZF1	259.793	1.45066	0.187327	7.74402	9.63211e-15	8.48959e-13	291.683	138.857
RP11-728F11.4	40.7229	-2.40734	0.311542	-7.72719	1.09951e-14	9.66818e-13	25.5556	177.714
VAV1	95.9247	1.87768	0.243333	7.71648	1.19582e-14	1.04906e-12	120.048	44
ABHD17C	148.596	-1.23514	0.160271	-7.70655	1.29269e-14	1.13139e-12	122.333	381.071
LRRN1	223.316	2.55048	0.331005	7.70525	1.30588e-14	1.14027e-12	299.81	62.7143
HLA-G	85.3719	6.17058	0.800931	7.70426	1.31604e-14	1.14648e-12	115.254	2.07143
NHLRC4	66.4605	-2.5642	0.333124	-7.69743	1.38827e-14	1.20661e-12	39.9048	304.929
RP11-305L7.1	6.85318	-2.01938	0.262459	-7.69408	1.42518e-14	1.23583e-12	4.74603	26.3571
SACS	695.838	1.68699	0.219356	7.69066	1.4638e-14	1.26639e-12	844.508	350.786
RAC2	155.203	1.80966	0.235344	7.68939	1.47832e-14	1.27602e-12	198.19	74.8571
RUNX1	972.709	2.1049	0.273771	7.68852	1.48846e-14	1.28182e-12	1159.25	403.214
TXLNB	62.6122	3.36027	0.43711	7.68748	1.50065e-14	1.28936e-12	84	9.57143
B4GALT5	1031.86	1.04621	0.136118	7.6861	1.51688e-14	1.30033e-12	1196.19	766.714
PQLC2L	32.2709	3.03763	0.395273	7.68489	1.53129e-14	1.30969e-12	39.7143	6.07143
AC007246.3	71.0372	-1.18255	0.154229	-7.66748	1.75402e-14	1.49339e-12	60.3175	174.143
PMEL	1043.5	5.80595	0.757587	7.66374	1.806e-14	1.53416e-12	1241.78	26.5714
SLC38A6	255.248	1.45565	0.18999	7.6617	1.8349e-14	1.55519e-12	301.619	140.286
SLC37A2	202.838	1.61856	0.211278	7.66082	1.84756e-14	1.55687e-12	232.667	104.143
PIK3AP1	635.512	1.76983	0.231027	7.66069	1.84932e-14	1.55687e-12	811.349	306.429
IFNGR2	443.306	1.00594	0.131307	7.661	1.84493e-14	1.55687e-12	473.444	319.286
RAB6B	576.726	2.01609	0.263265	7.65804	1.88798e-14	1.58586e-12	656.841	226.786
SMOX	112.067	1.73832	0.22716	7.65239	1.97276e-14	1.65338e-12	134.587	54.7143
KLHL6	260.215	2.2706	0.29677	7.65104	1.99368e-14	1.66719e-12	275.619	86.7857
ZEB2P1	6.4685	-2.27921	0.298181	-7.64373	2.11021e-14	1.76071e-12	4.25397	25.4286
CCR1	118.205	2.16737	0.283579	7.64293	2.12327e-14	1.76769e-12	159.286	42.8571
CNTN6	169.679	5.69752	0.7456	7.64152	2.1467e-14	1.78324e-12	251.254	5.71429
ENO2	598.899	2.32603	0.304417	7.64091	2.15686e-14	1.78771e-12	738.222	212.429
KCNIP3	1006.28	2.1142	0.276715	7.64034	2.16641e-14	1.79168e-12	1171.05	373.5
IFI16	651.152	1.70304	0.223278	7.62744	2.39462e-14	1.97172e-12	813.524	328.857
CHIT1	44.9066	3.7679	0.494328	7.62228	2.49235e-14	2.04771e-12	55.9048	6.14286
FN1	15671.5	3.08094	0.404261	7.62118	2.5136e-14	2.06066e-12	22354.6	3384.43
LRRC25	78.6416	1.69624	0.222612	7.6197	2.54274e-14	2.08001e-12	96.873	40.5
LILRA6	46.63	2.3015	0.302133	7.61748	2.58674e-14	2.1114e-12	57.9206	16.2857
CLCNKA	429.575	-3.51604	0.461751	-7.61459	2.64525e-14	2.15447e-12	171.254	2535.29
LRIT3	13.6418	-1.8359	0.241138	-7.61348	2.66804e-14	2.16833e-12	9.01587	44.0714
TRPM2	289.74	2.18948	0.28796	7.60341	2.88431e-14	2.33903e-12	350.19	107.143
ASPDH	46.7171	-2.41305	0.317547	-7.59904	2.98339e-14	2.41417e-12	28.7619	187.786
CLMN	1571.79	-1.64575	0.216657	-7.59608	3.05246e-14	2.46474e-12	1245.76	4893.29
TMEM100	36.2447	3.18673	0.419691	7.59302	3.12527e-14	2.51273e-12	47.2063	6.71429
CPNE6	32.3115	-2.00088	0.263556	-7.59186	3.15355e-14	2.53005e-12	22.5873	115.786
HOXB1	6.14545	-3.08381	0.406338	-7.58928	3.21684e-14	2.57532e-12	2.88889	32.4286
APOBR	92.4826	1.98669	0.261803	7.58852	3.23589e-14	2.58506e-12	106.841	35.7143
VWF	2751.65	2.27097	0.299604	7.5799	3.45808e-14	2.7567e-12	3410.35	926.286
RGS1	504.05	2.88019	0.380097	7.57752	3.52209e-14	2.80178e-12	632.968	125
SLC22A14	7.79663	-2.05784	0.271675	-7.57463	3.60163e-14	2.859e-12	5.30159	27.8571
CLIP4	658.685	1.48275	0.195771	7.5739	3.62184e-14	2.86897e-12	732.429	363.929
YWHAH	674.955	1.18391	0.156332	7.57303	3.64628e-14	2.88225e-12	838.302	469.643
SETP21	32.9914	4.02938	0.532463	7.56743	3.80677e-14	3.00279e-12	43.5397	3.28571
KAL1	78.2699	2.03859	0.269443	7.56594	3.85062e-14	3.03101e-12	100.794	31.3571
ITGB2	608.354	1.90328	0.251596	7.56482	3.88404e-14	3.05092e-12	764.603	272.929
PTPN1	1129.96	1.14323	0.151142	7.56398	3.90916e-14	3.06424e-12	1248.24	735.5
IQGAP3	82.8133	2.86027	0.3784	7.55885	4.06639e-14	3.18085e-12	110.841	19.7857
LINC01270	15.0272	3.29989	0.436985	7.5515	4.30286e-14	3.35882e-12	14.8254	2.14286
RP11-283G6.3	25.9276	2.89794	0.383853	7.5496	4.36588e-14	3.40095e-12	21.0159	4.28571
CTB-55O6.8	92.3602	-2.16424	0.28682	-7.54564	4.50075e-14	3.49875e-12	56.1429	354.286
CAMKK1	310.807	2.0688	0.274326	7.54139	4.64977e-14	3.60713e-12	387.603	126.286
CD70	24.8498	5.2618	0.697819	7.54035	4.68715e-14	3.62541e-12	30.9683	1.14286
RP5-916O11.1	10.3837	2.58023	0.342402	7.53567	4.85836e-14	3.74572e-12	11.8413	2.71429
PODXL	2370.11	-1.95106	0.258961	-7.5342	4.91353e-14	3.78049e-12	1782.7	8334
HSP90B2P	27.3745	-1.17369	0.155799	-7.53339	4.94399e-14	3.79616e-12	24.7143	72.4286
RP4-541C22.5	4.23748	-2.38119	0.316381	-7.52633	5.21859e-14	3.99882e-12	2.77778	18.1429
PIPOX	121.529	-2.83622	0.376865	-7.52582	5.23891e-14	4.00622e-12	66.4603	565.571
RHEB	493.909	1.17957	0.156756	7.52485	5.27826e-14	4.01993e-12	590.841	333.429
LIF	585.508	2.99643	0.398193	7.52506	5.26958e-14	4.01993e-12	715.095	135.429
PIK3R6	49.7513	2.39625	0.319051	7.51055	5.88802e-14	4.47526e-12	64.1111	16.0714
LINC00954	317.507	3.10113	0.413012	7.50857	5.97788e-14	4.52523e-12	387.667	64.2143
RP11-575G13.2	35.7393	2.71251	0.361251	7.50865	5.97407e-14	4.52523e-12	43.619	9.35714
TRIM50	57.0619	-3.5241	0.469592	-7.50461	6.16125e-14	4.65465e-12	21.381	328.857
NRG3	230.753	2.39262	0.318893	7.50288	6.24303e-14	4.70697e-12	226.254	61.3571
VPS18	914.874	1.88598	0.251465	7.49995	6.38402e-14	4.80362e-12	1175.02	423.357
FCER1G	82.7419	2.27961	0.303998	7.49876	6.44264e-14	4.83804e-12	109.81	27.9286
NIP7	330.407	2.04284	0.2725	7.49664	6.54741e-14	4.9069e-12	371.968	122.214
CXCL1	161.665	3.49107	0.465959	7.49224	6.77086e-14	5.06425e-12	193.794	28.2857
CHRNA6	13.4707	5.46363	0.729412	7.49046	6.86332e-14	5.12321e-12	17.8889	0.5
EMR4P	26.9263	2.47414	0.330388	7.4886	6.96096e-14	5.18578e-12	30.2063	7.64286
OSTM1	514.302	1.78738	0.238701	7.48796	6.99524e-14	5.201e-12	546.698	215.357
ANKRD1	63.0924	4.47588	0.598086	7.48367	7.22734e-14	5.35237e-12	67.1429	3.57143
IFI30	937.432	2.31332	0.309105	7.48392	7.2137e-14	5.35237e-12	1266.75	314.714
CLEC12A	19.3801	2.41125	0.322301	7.48135	7.35608e-14	5.43698e-12	22.7302	5.78571
CD80	21.8646	2.45154	0.327725	7.48046	7.4063e-14	5.46334e-12	26.8254	6.42857
CEP55	14.7694	3.59169	0.480194	7.47967	7.45116e-14	5.48566e-12	20.8095	2.28571
CSTB	586.732	1.83385	0.245219	7.47843	7.52184e-14	5.52686e-12	744.841	269.929
FMO5	151.49	-1.31554	0.175987	-7.47523	7.70697e-14	5.64604e-12	130.444	412.929
NFAM1	242.19	2.12904	0.284817	7.47511	7.71412e-14	5.64604e-12	277.857	94.5
HIST1H2AG	52.0043	2.20819	0.295417	7.47482	7.73104e-14	5.64742e-12	67.8413	19.0714
HOXD3	141.609	-1.89528	0.253714	-7.47015	8.01063e-14	5.8177e-12	100.54	504.714
XXbac-B476C20.13	58.4997	1.77766	0.238087	7.46643	8.24014e-14	5.97283e-12	62.381	26.2857
RP11-305L7.5	5.62733	-2.13893	0.286596	-7.46323	8.44255e-14	6.10775e-12	3.55556	20.4286
LILRB1	112.004	1.93502	0.259288	7.46285	8.46738e-14	6.11394e-12	135.81	47.5
RP11-513G11.2	11.8991	4.76276	0.638321	7.46139	8.56139e-14	6.16995e-12	13.0635	0.642857
C9orf173-AS1	59.0082	-2.1297	0.285505	-7.45941	8.69093e-14	6.25131e-12	39.381	222.5
PTPRE	401.138	1.37119	0.183832	7.45897	8.72028e-14	6.26043e-12	484.429	258.357
TPX2	45.2585	2.9143	0.390809	7.45711	8.84424e-14	6.3373e-12	59.5873	9.92857
BIN2	104.535	1.76316	0.236799	7.44581	9.63501e-14	6.89077e-12	125.206	49.5714
PSORS1C1	36.6877	2.5582	0.343728	7.4425	9.87988e-14	7.05247e-12	42.6984	10.2857
C3AR1	117.018	1.89187	0.254231	7.44154	9.95147e-14	7.09009e-12	148.667	49.2857
FCGR1A	55.8412	2.19482	0.295064	7.43846	1.01869e-13	7.24408e-12	69.9206	19.2857
FNIP2	4471.06	1.75122	0.23564	7.43175	1.07169e-13	7.60658e-12	4899.03	1864.57
INPP5J	291.066	-2.87091	0.386558	-7.42685	1.11217e-13	7.87896e-12	154.921	1474.29
ANLN	46.2427	3.01104	0.405519	7.42517	1.12638e-13	7.95381e-12	64.619	10.3571
RP11-43D4.2	20.1625	2.72269	0.366688	7.4251	1.12697e-13	7.95381e-12	23.5714	5.07143
AMY2B	401.552	-1.41816	0.191127	-7.41999	1.17129e-13	8.25114e-12	323.524	1150.64
PBX3	259.266	1.36757	0.184325	7.41939	1.17665e-13	8.25911e-12	304.619	155.571
GPX1	1246.18	1.4167	0.190946	7.41937	1.17683e-13	8.25911e-12	1452.62	720.857
GPRC5B	794.217	-1.23711	0.166911	-7.41182	1.24581e-13	8.72694e-12	697.873	2096.79
UPP1	1126.89	3.07838	0.415354	7.41146	1.24918e-13	8.73427e-12	1279.87	213.857
AC006019.3	210.106	3.18033	0.429132	7.41108	1.25278e-13	8.74316e-12	225.873	30.9286
SLC7A1	1160.55	1.82774	0.246703	7.40867	1.27575e-13	8.88695e-12	1487.25	538.643
LHFPL2	478.033	1.6256	0.219523	7.40515	1.31003e-13	9.10885e-12	518.143	243
SLC43A1	87.2609	-1.56101	0.210978	-7.39895	1.37267e-13	9.52671e-12	71.1429	279.071
SEMA3E	90.918	3.91243	0.528934	7.39682	1.39481e-13	9.66253e-12	122.762	10.9286
GSTM3	413.214	-2.08122	0.281396	-7.39605	1.40292e-13	9.7008e-12	300.302	1596.29
RELL1	611.702	1.30899	0.177051	7.39331	1.43221e-13	9.88515e-12	687.127	360
BEST1	193.069	1.38292	0.187109	7.391	1.4573e-13	1.00399e-11	225.079	112.286
EPHA5-AS1	44.5827	6.38181	0.863579	7.38995	1.46883e-13	1.01008e-11	49.5556	0.928571
NDRG4	948.004	3.58897	0.485703	7.38922	1.4769e-13	1.01377e-11	1066.68	137.929
PLTP	768.301	1.7935	0.242731	7.38884	1.48118e-13	1.01485e-11	1003	370.929
HOXA13	107.288	4.5069	0.609984	7.38856	1.48429e-13	1.01513e-11	127.889	6.5
SMIM11	76.9851	-1.28383	0.173884	-7.38326	1.5446e-13	1.05254e-11	63.9841	193.214
THRB	269.596	-1.55141	0.210304	-7.37702	1.61874e-13	1.10106e-11	218.556	824.214
ENOX1	39.4605	-1.95207	0.264634	-7.37651	1.62496e-13	1.1033e-11	29.3651	142.571
TMEFF2	53.2486	3.69641	0.501196	7.37519	1.6411e-13	1.11225e-11	68.2698	7.14286
ITGA4	367.157	1.53763	0.208504	7.37459	1.64847e-13	1.11523e-11	447.937	198.929
THEMIS2	355.987	1.89283	0.256708	7.3735	1.66204e-13	1.12238e-11	433.159	167.929
TEF	322.697	-1.44633	0.196162	-7.37314	1.66652e-13	1.12339e-11	265.73	901.714
RP11-33M22.2	16.3	6.78939	0.921322	7.36918	1.71679e-13	1.1552e-11	14.381	0
FAP	73.3455	3.39387	0.460649	7.36758	1.73748e-13	1.16703e-11	100.381	13.9286
ADD2	23.5472	2.26791	0.307909	7.36551	1.7647e-13	1.1832e-11	28.9841	8.5
CPZ	224.089	3.21449	0.436643	7.36184	1.81395e-13	1.21179e-11	303.365	45.5
NEK6	954.193	1.21756	0.165393	7.36161	1.81702e-13	1.21179e-11	1121.87	615.643
HOXD4	120.352	-1.66265	0.225843	-7.36199	1.81189e-13	1.21179e-11	95	392.714
SLC5A3	3134.26	-1.85869	0.252777	-7.3531	1.93658e-13	1.28924e-11	2378.19	11222.3
SLC43A2	1063.03	-1.42307	0.193603	-7.35043	1.97564e-13	1.31291e-11	885.54	3003.43
IGSF6	243.721	1.14909	0.156346	7.34967	1.98695e-13	1.31809e-11	270.778	160.214
CELF2-AS1	143.357	2.38088	0.324048	7.3473	2.02254e-13	1.33934e-11	169.254	45.6429
KLHL3	538.494	-1.71722	0.233775	-7.34562	2.0481e-13	1.35387e-11	408.746	1728.14
PSG2	18.1886	6.27967	0.855241	7.34258	2.09513e-13	1.38253e-11	20.8413	0.357143
NLRP14	9.43763	-1.78951	0.24377	-7.34098	2.12041e-13	1.39675e-11	7.26984	33.3571
TMEM178B	482.911	1.77905	0.242512	7.33592	2.20201e-13	1.44796e-11	551.841	227.357
ANKRD6	597.096	1.29531	0.176713	7.33003	2.30109e-13	1.51047e-11	698.619	392
OTOA	14.7457	2.34283	0.31967	7.3289	2.32041e-13	1.5205e-11	18.7937	4.64286
HJURP	18.6397	3.0713	0.419276	7.32525	2.3845e-13	1.55977e-11	24.9048	3.78571
GTSE1	24.8271	2.81738	0.384683	7.3239	2.40864e-13	1.57282e-11	31.7143	6
LINC00961	37.3435	-1.6045	0.219088	-7.32354	2.41511e-13	1.57431e-11	28	112.214
DUXAP10	108.567	2.99984	0.40987	7.31898	2.49856e-13	1.62307e-11	131.889	22.1429
MDK	920.52	3.58524	0.490043	7.31617	2.55151e-13	1.6546e-11	1240.02	138.357
HOXB-AS3	87.3435	-1.69279	0.231411	-7.31509	2.57216e-13	1.6641e-11	65.9048	290.357
RP5-916O11.2	6.68105	4.3548	0.59533	7.31494	2.57502e-13	1.6641e-11	7.50794	0.5
HLA-A	3408.78	1.84354	0.252035	7.31462	2.58103e-13	1.66512e-11	4389.25	1513.64
KCNJ10	324.384	-3.23122	0.442002	-7.31043	2.66297e-13	1.70917e-11	148.429	1740.14
PSG4	128.932	4.50281	0.616538	7.30338	2.80632e-13	1.79811e-11	162.365	9.78571
MAT1A	187.889	4.21999	0.578309	7.29712	2.93993e-13	1.8805e-11	273.778	18.2143
CTD-2353F22.2	39.5028	2.90714	0.398687	7.29177	3.05901e-13	1.95003e-11	43.9841	8
FTH1P10	138.807	1.81684	0.2492	7.29072	3.08312e-13	1.96207e-11	169.492	61.2857
C1orf226	149.468	-1.75189	0.240339	-7.28922	3.1175e-13	1.98059e-11	117.889	516.5
RNFT2	194.925	2.0885	0.286535	7.28883	3.12665e-13	1.98305e-11	211.921	70.6429
RP11-79H23.3	158.467	2.19179	0.300739	7.28803	3.14509e-13	1.99138e-11	166.19	51.7857
PRR15	43.8411	-1.92704	0.264621	-7.28228	3.28224e-13	2.07472e-11	32.5714	161.5
CD247	50.3737	2.0719	0.284703	7.27741	3.40286e-13	2.14374e-11	62.9841	20.5714
EMILIN2	256.272	1.45716	0.200363	7.27258	3.52687e-13	2.21815e-11	289.683	145.429
MCTP1	200.745	1.37948	0.18982	7.26729	3.66775e-13	2.30289e-11	227.063	113.571
RP11-480I12.5	20.1446	-2.54464	0.350331	-7.26353	3.77124e-13	2.36392e-11	12.7143	84.8571
TNFAIP6	8.59493	5.09959	0.702114	7.2632	3.78032e-13	2.36508e-11	12.1905	0.428571
FPR1	40.6085	2.35178	0.323878	7.26132	3.83339e-13	2.3909e-11	52.6349	13.4286
RP3-510D11.2	15.9243	2.44806	0.337215	7.25965	3.88107e-13	2.41663e-11	18.6349	4.92857
HMGB3P8	14.923	7.04301	0.970975	7.25354	4.06008e-13	2.5239e-11	17.381	0
RHOQ	1090.93	1.00872	0.139093	7.25209	4.1038e-13	2.54687e-11	1228.02	818.571
LINC00900	27.2533	2.36328	0.325888	7.25182	4.11211e-13	2.54781e-11	33.7143	8.5
CDCA2	24.0757	3.1522	0.434781	7.25008	4.16539e-13	2.57657e-11	34.127	4.57143
SLC29A2	101.35	-1.86841	0.257748	-7.24899	4.19902e-13	2.5931e-11	68.9683	351.643
CD52	41.1566	2.21642	0.306043	7.24217	4.41554e-13	2.72234e-11	53.8413	15.1429
RP11-261B23.2	6.92704	5.94613	0.821667	7.23667	4.59847e-13	2.83047e-11	9.25397	0
LAT2	100.306	1.25931	0.174079	7.23413	4.68518e-13	2.87913e-11	116.619	63.0714
HOXD8	320.465	-2.11126	0.291986	-7.2307	4.80527e-13	2.9481e-11	208.381	1210.43
RP1-168L15.6	21.8199	-1.85139	0.256086	-7.22955	4.84582e-13	2.96812e-11	14.9683	72.1429
LINC00484	61.6071	-1.84079	0.254801	-7.22445	5.03126e-13	3.07669e-11	43.7143	208.143
CD8A	76.3038	2.29661	0.317992	7.22223	5.11424e-13	3.12235e-11	98.2698	24.8571
TKT	1089.78	1.33597	0.184994	7.22172	5.13334e-13	3.12892e-11	1308.48	687.857
CHAT	47.5762	8.91302	1.23482	7.21809	5.27219e-13	3.20835e-11	42.2698	0.142857
PPP1R3B	823.534	1.46447	0.203006	7.21392	5.43632e-13	3.30176e-11	990.54	475.643
DUXAP8	69.4483	3.10357	0.430231	7.21375	5.44329e-13	3.30176e-11	90.1746	14.5714
LHCGR	279.095	3.63449	0.50401	7.21114	5.54855e-13	3.34141e-11	302.984	29.6429
LINC01544	16.9551	-2.06139	0.285866	-7.21103	5.55315e-13	3.34141e-11	11.5079	61.2857
RP11-305L7.7	81.2384	-1.92116	0.266411	-7.21124	5.54466e-13	3.34141e-11	56.619	278
RP11-968O1.5	57.0311	-1.30734	0.181304	-7.21078	5.56331e-13	3.34217e-11	45.5873	149.071
MAN2B1	760.169	1.20243	0.166766	7.21029	5.5834e-13	3.34888e-11	918	512.857
ERVMER34-1	24.839	-2.34424	0.325187	-7.20888	5.64125e-13	3.37818e-11	16.7143	108.5
BHLHE40	4234.8	1.7462	0.242242	7.2085	5.65698e-13	3.38221e-11	4884.76	2033.79
CEACAMP5	28.3477	5.50854	0.764202	7.20822	5.66866e-13	3.3838e-11	33.0952	1
LILRA4	10.8695	3.22679	0.447911	7.20408	5.84367e-13	3.48274e-11	13	1.78571
ESYT1	1535.22	1.6134	0.223966	7.20378	5.85675e-13	3.485e-11	1975.32	822.071
MAP1B	2265.42	1.67557	0.232611	7.20333	5.87607e-13	3.49096e-11	2843.63	1162.43
GCNT1	173.564	1.47438	0.204727	7.20169	5.9469e-13	3.52746e-11	195.778	87.2857
AQP3	433.023	-2.61325	0.362906	-7.20091	5.98138e-13	3.54232e-11	272.429	2123.64
SP140	41.7571	1.99429	0.276986	7.19996	6.02295e-13	3.56132e-11	52.873	17.4286
RP3-391O22.3	32.1806	4.35321	0.6047	7.19895	6.06762e-13	3.58209e-11	36.1587	2.57143
ANKRD29	135.701	1.55897	0.216735	7.19294	6.34087e-13	3.73753e-11	150.238	68.2143
IRF8	232.986	1.65222	0.229733	7.19193	6.38829e-13	3.75369e-11	283.905	121.429
GRAMD2	71.8539	-1.89168	0.263025	-7.19202	6.38378e-13	3.75369e-11	49.9841	248.714
BCO1	116.589	2.6928	0.374734	7.18591	6.67629e-13	3.91679e-11	155.492	26.7857
ARHGAP1	1760.73	1.00018	0.139192	7.18561	6.69081e-13	3.91919e-11	2082.11	1360.43
PDCD4	1095.78	1.47917	0.20588	7.18462	6.73941e-13	3.9415e-11	1344.3	599.143
TFCP2L1	2202.69	-2.04847	0.285395	-7.17766	7.09122e-13	4.12797e-11	1520.24	8019.5
FAM78A	157.052	1.37675	0.19181	7.17772	7.08858e-13	4.12797e-11	183.492	94.2143
EFHD1	805.506	-1.93198	0.269267	-7.17497	7.23244e-13	4.20366e-11	574.571	2840
DNAJC27-AS1	35.0753	-1.57832	0.220005	-7.174	7.28376e-13	4.22695e-11	24.7778	95.4286
PLCH2	428.303	-2.43985	0.34032	-7.16929	7.53894e-13	4.35484e-11	267.825	1893.57
AS3MT	387.256	2.36351	0.32967	7.16932	7.53697e-13	4.35484e-11	406.984	124.857
SNX20	66.7662	1.73796	0.242533	7.16588	7.72889e-13	4.4577e-11	81.381	33.3571
NTSR1	49.5084	-2.90697	0.405801	-7.16353	7.8628e-13	4.52799e-11	23.8095	262.786
SMPDL3B	142.663	2.99725	0.418676	7.15888	8.13407e-13	4.67703e-11	195.968	31
MS4A7	369.312	1.88648	0.263635	7.15565	8.32778e-13	4.78109e-11	458.048	166.357
TRPM5	7.98114	-2.62617	0.367104	-7.15376	8.44313e-13	4.83253e-11	4.60317	42.0714
PLEKHD1	32.369	-2.57287	0.359651	-7.15378	8.44192e-13	4.83253e-11	18.3492	141.357
C9orf173	35.1429	-2.07326	0.289856	-7.15271	8.50797e-13	4.86223e-11	24.3492	130.429
C14orf37	270.578	-1.40974	0.197217	-7.14817	8.79443e-13	5.01831e-11	227.603	737.143
BAI1	1126.1	3.82936	0.535844	7.14641	8.9077e-13	5.07523e-11	1306.38	143.857
IKBKE	124.608	1.64908	0.230811	7.14473	9.01762e-13	5.13007e-11	162.508	67.6429
NR3C2	610.848	-1.35722	0.189977	-7.14413	9.05699e-13	5.14467e-11	515.683	1701.71
RP11-115P21.1	6.41214	3.4133	0.478016	7.14055	9.29598e-13	5.27245e-11	8.11111	1
CTSA	2582.34	1.44044	0.201748	7.1398	9.34635e-13	5.29076e-11	2903.52	1410.36
TLR7	85.5932	1.87294	0.26233	7.13966	9.35645e-13	5.29076e-11	107.635	38.0714
SRGAP3	375.766	-1.35287	0.189592	-7.13566	9.63224e-13	5.43852e-11	314.333	1079.57
MS4A6A	345.801	1.88633	0.264366	7.13527	9.65956e-13	5.44222e-11	426.873	150.071
ZNF582-AS1	21.8182	-1.38511	0.194124	-7.13516	9.66778e-13	5.44222e-11	18.3333	61.2857
DCXR	301.764	-1.7382	0.243627	-7.13465	9.70305e-13	5.45373e-11	241.635	994.071
FAM132B	158.111	3.63078	0.508907	7.13445	9.71727e-13	5.45373e-11	185.667	23.6429
GOLGA7B	69.9662	2.98167	0.418114	7.13122	9.94812e-13	5.57496e-11	75.3651	14.2143
MPG	272.087	1.78419	0.250287	7.1286	1.01394e-12	5.67371e-11	327.286	130.714
TUBA1A	716.203	1.29945	0.182317	7.12744	1.02253e-12	5.71324e-11	879.952	457.286
CCT8P1	40.9633	-1.19676	0.167963	-7.12517	1.03955e-12	5.79968e-11	35.2857	106.214
RP11-268J15.5	81.5996	-1.53409	0.215321	-7.12469	1.04316e-12	5.81122e-11	64.1111	249.357
HEXB	620.051	1.35804	0.19071	7.12095	1.07188e-12	5.9535e-11	748.46	369.286
SPI1	243.13	1.46785	0.206148	7.12038	1.07627e-12	5.96622e-11	272.46	134.714
RP11-794G24.1	17.4101	-2.60974	0.366524	-7.12025	1.07734e-12	5.96622e-11	9.88889	83.6429
ITGAM	534.651	3.35618	0.471405	7.11952	1.083e-12	5.98874e-11	727.905	95.6429
HIST1H3J	10.2551	3.27707	0.460322	7.11907	1.08655e-12	5.99954e-11	14.5238	1.78571
CTD-3214H19.6	13.1464	-2.24854	0.315877	-7.1184	1.09186e-12	6.02e-11	8.95238	57.3571
TNFRSF9	37.9017	3.61393	0.507842	7.11625	1.10905e-12	6.10579e-11	52.3016	5.35714
RP11-480I12.7	16.1478	-2.29699	0.32297	-7.11209	1.14296e-12	6.28328e-11	10.6349	60.7857
ALDH7A1P1	23.0798	-1.12673	0.158445	-7.11116	1.15076e-12	6.31687e-11	20.6508	58.2143
AC012456.3	8.92165	6.36528	0.895489	7.10817	1.17595e-12	6.44578e-11	11.1905	0
CILP2	51.9674	4.51841	0.635785	7.10682	1.18748e-12	6.49945e-11	70.381	4.21429
ARL11	23.8812	1.70509	0.240324	7.09496	1.29386e-12	7.0509e-11	27.7302	11.9286
ACY1	565.028	-2.07568	0.292577	-7.09448	1.2984e-12	7.06537e-11	416.143	2092.93
OSGIN1	193.195	1.84114	0.259528	7.0942	1.30106e-12	7.06582e-11	244.095	86
PRDM16	310.385	-2.63571	0.371537	-7.09407	1.30225e-12	7.06582e-11	182.571	1466.71
AC098820.3	6.61396	-1.49659	0.211018	-7.09224	1.31962e-12	7.14973e-11	5.52381	19.6429
AC046143.6	7.15867	5.75573	0.812064	7.08778	1.36282e-12	7.37319e-11	8.20635	0.0714286
PTPRC	594.368	1.90831	0.269502	7.08086	1.43261e-12	7.73957e-11	756.143	255.286
NEIL3	10.7319	3.25544	0.459766	7.08064	1.43488e-12	7.74072e-11	13.9206	1.92857
ARNTL2	65.0185	1.95933	0.276777	7.07908	1.45117e-12	7.81738e-11	72.8254	26.2143
BCAT1	287.692	2.4608	0.347757	7.07621	1.48154e-12	7.95813e-11	375.73	85.5714
CNKSR2	221.238	3.71843	0.525532	7.07554	1.48863e-12	7.9848e-11	287.159	27.7857
LRRC46	30.5326	-1.33695	0.188988	-7.07428	1.50225e-12	8.04635e-11	25.619	77.8571
EPN3	86.9582	-2.20406	0.311807	-7.06869	1.564e-12	8.36517e-11	58.3968	358.786
TRIM72	422.581	6.31661	0.893663	7.06823	1.56927e-12	8.38139e-11	698.746	9.42857
ARPC1B	470.166	1.49434	0.211438	7.0675	1.5775e-12	8.41339e-11	596.778	277.786
FOLR3	10.9927	-2.92806	0.414474	-7.06453	1.61163e-12	8.58324e-11	5.33333	52.7143
RAB9B	40.0327	1.63991	0.232177	7.06318	1.62739e-12	8.6549e-11	49.4921	21.5714
GRID1	251.506	3.31501	0.469445	7.06154	1.64667e-12	8.74503e-11	277.397	45.2857
COL11A1	112.553	4.03127	0.571368	7.05547	1.72019e-12	9.10975e-11	152.889	11.8571
RP11-442O1.4	13.2231	-2.71296	0.385447	-7.03847	1.94366e-12	1.02642e-10	6.92063	55.4286
FFAR4	8.38571	2.42202	0.344148	7.03774	1.95384e-12	1.03035e-10	10.2381	2.42857
RP11-399K21.14	23.5292	-1.2561	0.178531	-7.03577	1.98159e-12	1.04352e-10	20.0476	59.3571
PXDN	1695.51	1.98519	0.282235	7.03384	2.00929e-12	1.05662e-10	2134.3	742.357
TIMP1	793.514	2.1761	0.309397	7.03335	2.01628e-12	1.05882e-10	1096.11	311.643
CXCR2P1	17.6777	3.18056	0.452292	7.0321	2.03448e-12	1.06539e-10	22.5556	3.35714
SERPINB9	319.226	1.247	0.177352	7.03122	2.04738e-12	1.07066e-10	381.492	210.5
CIB2	77.2822	1.92404	0.273697	7.02983	2.06779e-12	1.07982e-10	82.3968	30.1429
CTD-2555K7.2	5.04767	-1.92456	0.27405	-7.02265	2.17696e-12	1.13368e-10	3.60317	18
RP11-305L7.6	5.16443	-2.3299	0.331797	-7.02207	2.1861e-12	1.13686e-10	3.07937	20.5
C1QA	477.705	2.21319	0.315256	7.02031	2.21375e-12	1.14965e-10	631.333	171
SLC9A9	151.304	1.51878	0.216469	7.01614	2.28075e-12	1.18281e-10	191.032	87.3571
ADCY7	439.373	1.54893	0.220787	7.0155	2.29125e-12	1.18661e-10	527.111	251.071
SEZ6L	33.4744	4.35002	0.620454	7.01103	2.36575e-12	1.22183e-10	89.1429	3
FNDC4	56.9969	2.45851	0.351336	6.99759	2.60396e-12	1.34301e-10	72.0952	18.6429
CYP4F22	68.7525	5.93182	0.847896	6.99593	2.63501e-12	1.35715e-10	82.8889	1.92857
CLGN	26.3042	3.84742	0.550207	6.99268	2.69684e-12	1.3871e-10	33.9206	2.71429
CPXM2	1403.07	2.45172	0.350805	6.98884	2.77166e-12	1.42363e-10	1844.22	446.571
TMEM154	58.8655	1.69868	0.243114	6.98717	2.80495e-12	1.43876e-10	72.6032	30.0714
BBC3	247.846	2.04223	0.292378	6.98491	2.85044e-12	1.4601e-10	242.73	96.0714
2020-03-03	49.4594	1.718	0.246058	6.98209	2.90814e-12	1.48763e-10	60.8095	23.9286
GS1-600G8.5	47.3822	7.71336	1.10541	6.97784	2.99753e-12	1.53127e-10	54.746	0.357143
BCL11A	256.234	1.73895	0.249269	6.97619	3.03289e-12	1.54723e-10	317.19	128.357
ANTXRL	16.5592	6.83508	0.980675	6.96977	3.17458e-12	1.61731e-10	22.3492	0.142857
LMNB1	78.314	1.60192	0.229909	6.96765	3.22288e-12	1.6397e-10	101.524	43.2143
C9orf91	386.576	1.41706	0.203449	6.96517	3.28009e-12	1.66654e-10	410.778	204.857
SLC16A1	256.315	1.83603	0.263762	6.96095	3.37991e-12	1.71262e-10	313.079	103.929
SPN	177.354	1.56177	0.224356	6.96112	3.37576e-12	1.71262e-10	203.984	94.2143
RP4-655J12.4	28.3194	-3.35886	0.482732	-6.95803	3.45075e-12	1.74616e-10	11.2698	154.571
KRT17	128.231	3.79775	0.545932	6.95645	3.48954e-12	1.76342e-10	160.095	19.6429
TP73	136.25	2.39328	0.34411	6.95497	3.52646e-12	1.77968e-10	172.762	44.8571
BNIPL	26.6249	-1.33309	0.19176	-6.95188	3.60457e-12	1.81665e-10	20.9524	66.5714
ACBD3	567.118	1.21211	0.174374	6.95119	3.62213e-12	1.82306e-10	660.921	372.643
AC007040.11	86.5407	-2.98082	0.428906	-6.94982	3.65748e-12	1.83838e-10	43.0794	417.929
ITK	99.731	2.12734	0.306253	6.94635	3.74856e-12	1.87791e-10	125.968	37.5
SLC39A1	1225.31	1.55836	0.224345	6.94625	3.75112e-12	1.87791e-10	1562.7	669.429
HLA-V	125.197	4.18405	0.602596	6.94338	3.82828e-12	1.91144e-10	147.683	11.5
MARVELD2	206.963	-1.66435	0.239716	-6.94299	3.83883e-12	1.91416e-10	169.222	692.429
GRM1	32.1327	-2.80897	0.404731	-6.94035	3.91119e-12	1.94766e-10	15.4921	150.357
PDCL3P4	19.9009	-1.44159	0.207927	-6.93317	4.11509e-12	2.04648e-10	15.5714	55.9286
RP5-1018K9.1	4.9403	-3.16712	0.456838	-6.93269	4.12909e-12	2.05073e-10	2.28571	25.0714
PTPRO	246.894	-2.05195	0.295991	-6.93247	4.13556e-12	2.05123e-10	180.508	899.643
WNK4	602.364	-2.89313	0.417494	-6.92974	4.21621e-12	2.08847e-10	287.968	3016.71
DOCK11	401.253	1.37076	0.197831	6.92893	4.24043e-12	2.09585e-10	504.889	255.286
FPR3	142.879	1.80233	0.260119	6.92887	4.24228e-12	2.09585e-10	184.905	68.7857
TMEM70	218.881	1.93874	0.279874	6.92718	4.29311e-12	2.1154e-10	277.365	91.2143
DHDH	10.9735	-2.61197	0.377076	-6.9269	4.30162e-12	2.11681e-10	6.53968	47.4286
MIR4435-1HG	652.987	1.75184	0.253086	6.92193	4.45536e-12	2.1896e-10	765.54	321.571
ZNF252P-AS1	35.6841	-1.00531	0.145241	-6.92168	4.46324e-12	2.19061e-10	31.2698	84.5
MT1L	8.5713	-1.7445	0.252121	-6.91927	4.5398e-12	2.22527e-10	6.77778	29.2143
ARHGAP42	641.598	1.06217	0.15352	6.91878	4.55556e-12	2.23009e-10	695.762	447.929
RTKN2	44.8327	1.55953	0.225505	6.91572	4.65506e-12	2.27583e-10	55.6984	23.7143
ADAP2	294.629	1.23251	0.178365	6.91007	4.84423e-12	2.36216e-10	346	194.357
RNF223	93.5585	3.39367	0.491112	6.91017	4.84063e-12	2.36216e-10	104.746	16.9286
KIAA0930	873.767	1.42327	0.206039	6.90775	4.92412e-12	2.398e-10	1028.76	509.143
PHLDA3	372.011	1.76287	0.255257	6.90626	4.97612e-12	2.42019e-10	403.429	178.643
RP4-671O14.5	85.2167	1.85542	0.268701	6.90516	5.0148e-12	2.43584e-10	98.1587	39.1429
CARD11	131.929	2.03537	0.294802	6.9042	5.0486e-12	2.44909e-10	156.714	54.8571
HIST1H3I	21.9683	2.21178	0.320415	6.90287	5.09638e-12	2.46908e-10	28.619	7.92857
LILRB2	106.137	1.84902	0.267928	6.9012	5.1565e-12	2.49499e-10	128.73	48.7143
GPR174	83.368	2.20192	0.319084	6.90077	5.1721e-12	2.49932e-10	106.794	30.7143
HIST1H3G	27.5064	2.73434	0.396255	6.90047	5.18313e-12	2.50142e-10	33.8254	6.14286
CTSD	15881.3	1.5522	0.224954	6.90006	5.19804e-12	2.5054e-10	19006.9	8197.86
CORO1A	389.685	1.57737	0.228823	6.89341	5.44687e-12	2.61526e-10	465.095	214.357
RP11-242J7.1	56.4677	5.65051	0.819934	6.89142	5.52368e-12	2.64876e-10	71.9048	2
RP11-146E13.4	20.7692	2.90004	0.420939	6.88945	5.6007e-12	2.68226e-10	25.127	4.57143
GAD1	65.0296	-2.84374	0.412826	-6.88847	5.63948e-12	2.6974e-10	32.9841	316.286
SLAMF1	26.2503	2.19091	0.318086	6.88779	5.66657e-12	2.70691e-10	33.9841	10.1429
TROAP	19.3386	2.60049	0.377928	6.88091	5.94705e-12	2.83009e-10	25.127	5.5
SRRM4	12.4764	-2.60102	0.378108	-6.87904	6.02578e-12	2.86392e-10	6.65079	52.1429
MYO1F	361.782	1.47988	0.215163	6.87797	6.07136e-12	2.88194e-10	424.032	208.857
RP11-231P20.2	12.5528	-2.10129	0.305661	-6.87458	6.21713e-12	2.94741e-10	7.66667	41.8571
FUT3	56.2498	-2.71976	0.39568	-6.87364	6.25858e-12	2.96331e-10	32.619	260.429
SAMD4A	936.858	1.17187	0.170526	6.87212	6.32538e-12	2.99117e-10	1085.71	670.5
FAM111B	23.1887	2.45049	0.357136	6.86149	6.81444e-12	3.21839e-10	30.9048	6.78571
CCNB1IP1P3	10.0351	6.33205	0.92326	6.85836	6.96561e-12	3.28565e-10	13.0476	0.0714286
CCDC109B	54.0552	1.37963	0.201178	6.85778	6.99373e-12	3.29477e-10	64.6667	32.5714
SH2D1A	23.9383	2.49716	0.364649	6.84812	7.48259e-12	3.51625e-10	30.6349	7.14286
LST1	49.6305	1.61885	0.236654	6.84057	7.88772e-12	3.702e-10	58.8571	25.7857
VWCE	174.735	2.67986	0.391914	6.83786	8.03829e-12	3.76523e-10	227.333	49.6429
GAPT	22.6128	1.91228	0.279663	6.83779	8.0425e-12	3.76523e-10	27.4444	9
SRP14-AS1	38.5745	-1.28129	0.187426	-6.83623	8.13051e-12	3.79697e-10	32.4762	102
ADRB1	20.6505	-2.29477	0.335921	-6.83126	8.41694e-12	3.92585e-10	12.4921	81.4286
GNS	4879.99	1.5337	0.224586	6.82899	8.55121e-12	3.98353e-10	5845.65	2579.14
IGFBPL1	28.7438	2.83942	0.415803	6.82876	8.56499e-12	3.985e-10	41.1905	7
TNFSF8	33.4064	1.94981	0.285567	6.82787	8.61831e-12	4.00485e-10	38.8413	14.0714
GSTP1	2639.19	1.89712	0.277927	6.82595	8.7345e-12	4.04882e-10	3386.21	1156.64
PYHIN1	33.3949	2.2409	0.328289	6.826	8.73158e-12	4.04882e-10	42.7143	12
CHEK2	50.6842	1.0104	0.148079	6.82337	8.89285e-12	4.11714e-10	59.8571	39.4286
FGD2	381.349	1.65469	0.242512	6.82313	8.90756e-12	4.11887e-10	436.46	195.571
LRRC37A11P	7.31078	-2.0644	0.302671	-6.8206	9.06603e-12	4.18699e-10	4.47619	23.6429
SIRT4	11.5257	-1.17482	0.172252	-6.82035	9.08169e-12	4.18907e-10	10.4444	30.0714
ARRB2	404.724	1.10654	0.162263	6.81945	9.13915e-12	4.2104e-10	478.397	292.429
TRIM59	73.0562	1.27484	0.18695	6.81916	9.15716e-12	4.21353e-10	88.9524	45.8571
AFF2	260.509	3.78546	0.555297	6.817	9.29643e-12	4.27237e-10	343.984	34.2857
LINC01296	337.551	2.69506	0.395468	6.81486	9.43543e-12	4.33095e-10	403.206	82.1429
RP11-352D13.6	158.686	-2.06879	0.303835	-6.80893	9.83301e-12	4.50794e-10	100.683	522.643
ACACB	1569.96	-1.12736	0.165578	-6.80865	9.85204e-12	4.51115e-10	1364.9	3886.14
CXCL16	467.574	1.30474	0.191711	6.80577	1.00511e-11	4.59669e-10	548.254	296.429
CCR5	86	1.95579	0.287421	6.80462	1.01314e-11	4.62778e-10	106.413	36.6429
MYO1G	163.498	1.80548	0.265424	6.80223	1.03011e-11	4.69956e-10	198.016	78.2857
MYBL1	76.4879	1.48383	0.218147	6.80195	1.03209e-11	4.70289e-10	87.8889	42.9286
CD2	60.232	2.06465	0.303557	6.80152	1.03523e-11	4.70764e-10	78.9365	23.7857
KBTBD12	24.6775	-2.11973	0.311658	-6.80146	1.03564e-11	4.70764e-10	15.873	94.0714
APOM	45.4828	-2.11657	0.311304	-6.79905	1.05314e-11	4.7814e-10	33.8889	171.286
SH3D21	260.448	-1.73903	0.255847	-6.79712	1.06731e-11	4.8399e-10	183.54	877.5
MMP11	187.574	1.68396	0.247776	6.79628	1.07353e-11	4.86224e-10	226.492	92.2857
FXYD5	153.025	1.40706	0.207119	6.79347	1.09469e-11	4.95207e-10	187.413	96.5
ATP6V1C2	181.247	-1.87189	0.275671	-6.79031	1.11894e-11	5.0557e-10	137.714	633.286
EMR2	346.677	2.90807	0.428337	6.78921	1.12749e-11	5.08819e-10	371.73	66.8571
NRGN	86.3061	-1.69926	0.25055	-6.78212	1.18424e-11	5.33147e-10	63.7302	268.143
CGNL1	1767.36	-2.21032	0.326019	-6.77972	1.20406e-11	5.41421e-10	1227.87	6910.71
SLC46A3	830.354	2.23947	0.330389	6.77829	1.2161e-11	5.46182e-10	880.889	235.714
RP11-20I23.13	117.896	-1.02596	0.151369	-6.77785	1.21981e-11	5.47197e-10	105.603	275.857
CDHR1	134.377	3.39458	0.500925	6.77662	1.2302e-11	5.50542e-10	198.587	22.7143
RHOH	41.1886	2.1922	0.323589	6.77464	1.24713e-11	5.57453e-10	50.8254	15.3571
CAPN13	40.8601	-2.41005	0.35607	-6.76847	1.30151e-11	5.80378e-10	25.5397	162.714
CIR1P2	8.85554	-1.93745	0.286246	-6.76847	1.3015e-11	5.80378e-10	6.50794	32.7857
ABCA4	55.7832	-2.78648	0.411845	-6.76586	1.32524e-11	5.89558e-10	31.2222	318.429
GIPR	322.514	3.95367	0.58445	6.76478	1.33513e-11	5.93257e-10	380.873	41.7857
FBXO41	164.393	1.80363	0.266688	6.76307	1.35094e-11	5.98596e-10	176.111	78.7857
AC074286.1	405.564	-2.32855	0.344303	-6.76309	1.35081e-11	5.98596e-10	253	1566.71
CH507-396I9.3	37.9792	-2.62166	0.387649	-6.76297	1.35193e-11	5.98596e-10	21.8254	163.929
DPF3	54.606	-1.93213	0.285705	-6.76268	1.35466e-11	5.99096e-10	40.3016	189.143
RHOU	432.978	2.1062	0.311479	6.76194	1.36159e-11	6.01454e-10	469.571	155.357
SLC7A11-AS1	14.2676	3.52699	0.521707	6.76048	1.37537e-11	6.06826e-10	17.3016	2.07143
CLUHP3	430.082	-1.10469	0.163429	-6.75946	1.38506e-11	6.10388e-10	382.095	1046.29
NABP1	1795.68	1.97092	0.291599	6.75899	1.38958e-11	6.11661e-10	2041.59	638.643
LNX1	124.199	-1.51768	0.224576	-6.75797	1.39938e-11	6.15254e-10	102.254	387.429
SLC22A13	84.4724	-2.79029	0.413017	-6.75586	1.41989e-11	6.22083e-10	49.1429	392
ANXA2	1362.28	1.36395	0.201889	6.75596	1.41897e-11	6.22083e-10	1688.62	837.571
TNFRSF12A	521.103	1.89061	0.279866	6.75541	1.42433e-11	6.23304e-10	625.778	241.5
RP11-4B16.3	26.5655	1.91738	0.284049	6.75019	1.47657e-11	6.45409e-10	27.3968	10.8571
RNU4-25P	6.20565	4.06446	0.602502	6.74597	1.52007e-11	6.63653e-10	6.95238	0.571429
EHMT2-AS1	23.705	-1.25636	0.186265	-6.74502	1.53007e-11	6.67241e-10	20.0476	60.1429
TLR2	248.82	1.4812	0.219616	6.74447	1.53591e-11	6.6901e-10	286.778	137.214
C10orf82	4.74715	-2.24175	0.332414	-6.74384	1.5425e-11	6.71102e-10	3.36508	19.8571
APOBEC3C	251.992	1.42078	0.210697	6.74324	1.54898e-11	6.73143e-10	289.762	141.786
HCG2040054	9.21295	-1.55702	0.231041	-6.73916	1.59308e-11	6.91508e-10	7.12698	27.7143
SMC4	368.517	1.01559	0.150709	6.73876	1.59743e-11	6.92597e-10	441.317	281.929
PARP15	79.232	1.8887	0.280321	6.73763	1.60995e-11	6.97219e-10	97.1746	35.2857
C1orf147	30.3602	1.8223	0.270497	6.73686	1.6185e-11	7.00111e-10	34.1429	13.5714
ACSBG2	5.21116	-1.62132	0.240675	-6.73656	1.62181e-11	7.00737e-10	4.09524	15.9286
TUSC3	439.514	1.40899	0.209196	6.73526	1.6364e-11	7.06229e-10	532.413	260.071
FGGY	175.066	-1.1817	0.175466	-6.73465	1.64322e-11	7.08356e-10	153.476	435.071
HCST	20.5865	1.90553	0.282959	6.7343	1.6472e-11	7.09257e-10	26.3175	9
KCNE4	298.166	2.12278	0.315273	6.73314	1.66042e-11	7.14133e-10	368.603	110.857
SSC4D	30.023	-1.9368	0.287724	-6.73144	1.67988e-11	7.21677e-10	21.8254	115.5
ARHGAP6	433.735	-1.392	0.206844	-6.7297	1.70012e-11	7.29536e-10	337.206	1230.14
S100A9	70.4783	3.21763	0.478336	6.72672	1.73532e-11	7.43793e-10	94.9683	12.0714
TTC39C	170.507	1.20862	0.179694	6.72601	1.74384e-11	7.46588e-10	184.476	112.714
PXMP2	99.5391	-1.3025	0.193682	-6.72496	1.7564e-11	7.51109e-10	87.3016	277.857
CD48	63.5552	1.85709	0.276157	6.72478	1.75863e-11	7.51207e-10	79.7778	29
CYBB	631.731	1.9461	0.28942	6.72414	1.76629e-11	7.53624e-10	818.492	264.571
PGBD5	234.425	1.85942	0.276568	6.72319	1.7779e-11	7.57715e-10	280.19	108.214
GRAP2	65.7776	1.76766	0.262971	6.72186	1.79421e-11	7.63802e-10	77.127	31.2143
AC087380.14	7.62832	-1.55025	0.230679	-6.72035	1.81283e-11	7.70851e-10	6.07937	23.2143
CACNA1I	15.9873	3.09065	0.460041	6.7182	1.83985e-11	7.81457e-10	34.746	2.92857
ROGDI	194.574	-1.06414	0.158406	-6.71776	1.84538e-11	7.82922e-10	173.222	472.857
CDC6	22.7531	2.0178	0.30044	6.71613	1.86614e-11	7.90836e-10	29.4921	9.57143
LY96	22.3297	2.8835	0.429712	6.71031	1.94218e-11	8.21205e-10	26.7143	4.71429
SLAMF8	72.231	2.41911	0.360893	6.70312	2.04013e-11	8.61652e-10	95.7778	22.7857
HSD17B14	400.831	1.69468	0.252838	6.70262	2.04715e-11	8.63643e-10	462.571	190.5
DEF6	104.103	1.67373	0.249784	6.70072	2.07394e-11	8.73965e-10	119.714	53.8571
RIPK2	88.5915	1.06522	0.159027	6.69837	2.1076e-11	8.87154e-10	107.841	66.5
COL8A1	518.332	2.27321	0.339405	6.69764	2.11817e-11	8.90604e-10	705.206	181.786
ENPP7P10	16.0624	-1.32464	0.197786	-6.69735	2.12229e-11	8.91338e-10	13.2381	42.7143
RP4-704D21.2	6.12539	-2.02834	0.302929	-6.69578	2.14521e-11	8.99958e-10	4.12698	22.5
NEK8	108.068	-1.05872	0.158133	-6.6951	2.15528e-11	9.03173e-10	97.2698	273.429
ARRDC5	17.0837	2.14693	0.320694	6.69464	2.16199e-11	9.04977e-10	20.127	6.07143
MOSPD1	114.185	1.65456	0.247169	6.69403	2.171e-11	9.0664e-10	141.683	57.5
ALDH6A1	1125.48	-1.92627	0.287766	-6.69389	2.17321e-11	9.0664e-10	843.492	3952.86
TMEM178A	123.62	-2.21108	0.33031	-6.69394	2.17238e-11	9.0664e-10	79.6032	466.357
MYLK3	19.4557	-2.0667	0.308798	-6.69272	2.19066e-11	9.12903e-10	13.6825	75.8571
ATP13A3	2430.86	1.17572	0.175836	6.68644	2.28661e-11	9.51832e-10	2776.1	1577.14
EIF2AK3	334.566	1.04675	0.156556	6.68612	2.2917e-11	9.5184e-10	383.746	248.143
MAL	581.667	-2.64211	0.395229	-6.68502	2.30893e-11	9.57937e-10	344.54	2735.71
LINC00087	49.3277	-1.73352	0.259333	-6.68454	2.31647e-11	9.60006e-10	39.3492	166.214
COL1A1	15899.8	3.17739	0.475427	6.68324	2.33718e-11	9.6752e-10	21977.7	3163.36
AC068491.2	30.0111	2.16129	0.323507	6.68081	2.37628e-11	9.82624e-10	37	11.6429
SLC15A1	177.554	2.26586	0.339229	6.67943	2.3988e-11	9.90843e-10	225.127	58.2143
VDR	226.551	-1.78226	0.266958	-6.67618	2.45243e-11	1.00856e-09	180.889	795.214
RTN4R	150.486	2.4896	0.37306	6.67346	2.49838e-11	1.02633e-09	191.81	45.1429
RP3-395M20.8	1252.62	2.30659	0.345713	6.67198	2.52379e-11	1.03564e-09	1309.79	410.786
GXYLT2	141.095	1.55905	0.233763	6.66934	2.56958e-11	1.05213e-09	165.349	74.0714
ZMIZ1-AS1	84.8105	2.37075	0.355465	6.66943	2.56799e-11	1.05213e-09	98.381	24
SLC25A25-AS1	399.361	-1.31722	0.197569	-6.66714	2.60836e-11	1.06568e-09	307.254	1069.86
CCL5	110.383	1.91573	0.287602	6.66103	2.71907e-11	1.1073e-09	137.317	47.2143
C2CD4A	129.476	4.84998	0.728599	6.65658	2.80277e-11	1.13891e-09	177.476	9.35714
AC068138.1	7.15027	-3.08592	0.463718	-6.65472	2.83838e-11	1.15214e-09	3.26984	38.5
CHN1	111.339	1.12728	0.169466	6.65192	2.89303e-11	1.17179e-09	119.683	71.0714
SLC38A5	64.5441	2.95314	0.443988	6.6514	2.9031e-11	1.1746e-09	82.0635	14
C3orf67	37.2196	1.60324	0.241144	6.64848	2.96145e-11	1.19563e-09	43.6349	19.0714
RAB38	160.865	1.99515	0.300235	6.64531	3.02579e-11	1.21898e-09	173.921	55.5
FCRL1	27.753	3.12584	0.470586	6.64243	3.08547e-11	1.2417e-09	38.5238	5.78571
ACAA1	533.128	-1.06483	0.160323	-6.64178	3.09918e-11	1.24569e-09	485.222	1300.14
CD86	58.6143	1.7899	0.269497	6.64164	3.10204e-11	1.24569e-09	74.5238	27.5714
SEMA3G	215.219	-1.85339	0.279229	-6.63751	3.19031e-11	1.2784e-09	166	749.143
ISG20	144.54	1.73417	0.26128	6.63721	3.19681e-11	1.27964e-09	176.159	72.5714
CSF2RA	39.6714	1.58924	0.239491	6.63592	3.22485e-11	1.28949e-09	44.7619	19.9286
PAQR7	344.48	-1.08247	0.16317	-6.63402	3.26674e-11	1.30347e-09	319.127	856.071
HAMP	10.3257	3.34762	0.504693	6.63298	3.28971e-11	1.31124e-09	11.746	1.57143
IL9RP3	15.2291	4.0653	0.613022	6.63158	3.32119e-11	1.32238e-09	18.8254	1.5
TMEM72	546.65	-2.98662	0.450468	-6.63002	3.35635e-11	1.33356e-09	273.444	2726.14
PDE6G	44.7412	2.75385	0.415391	6.62954	3.36729e-11	1.33649e-09	55.6984	11.2857
FUOM	50.2448	-1.42872	0.215584	-6.62723	3.4204e-11	1.3547e-09	43.4762	147
SFXN2	464.639	-1.56343	0.235945	-6.62625	3.44322e-11	1.36087e-09	344.016	1228.64
AC098617.1	64.1473	2.81127	0.424281	6.62596	3.45009e-11	1.36215e-09	70.3968	14.9286
LINC00152	691.474	2.1457	0.323926	6.62406	3.49456e-11	1.37681e-09	807.857	255.929
SNX22	432.028	1.93386	0.291974	6.62338	3.51078e-11	1.38175e-09	422.524	182.571
TANGO2	1194.24	1.95989	0.295915	6.62316	3.51601e-11	1.38236e-09	1405.21	509.143
MID1	536.965	1.15855	0.174938	6.6226	3.52943e-11	1.38619e-09	629.476	367.571
CISH	520.49	-1.50403	0.227139	-6.62162	3.55278e-11	1.3939e-09	401.587	1460
CPN1	12.6366	4.71656	0.712393	6.62073	3.57431e-11	1.40088e-09	16.4127	0.785714
DLGAP5	10.4518	3.26469	0.493156	6.61999	3.59211e-11	1.40639e-09	14.619	1.85714
COL4A3BP	1224.57	1.10215	0.166514	6.61897	3.61702e-11	1.41467e-09	1446.98	862.429
BAALC-AS1	27.8268	-1.01022	0.152658	-6.61758	3.65131e-11	1.4266e-09	24.1429	64.5
RASSF2	274.508	1.64302	0.248351	6.61571	3.69764e-11	1.44319e-09	346.317	143.929
PROM2	656.255	-2.82986	0.427905	-6.61329	3.75881e-11	1.46403e-09	353.841	3284.57
CCR7	44.3036	2.11168	0.319346	6.61251	3.77848e-11	1.47016e-09	56.2381	18.0714
FST	300.493	3.57184	0.540267	6.61125	3.8109e-11	1.48124e-09	235.111	29.3571
RP11-3K16.2	21.7544	-2.53143	0.382952	-6.6103	3.83551e-11	1.48927e-09	12.0635	94.3571
STIL	57.4802	1.58083	0.239172	6.60961	3.85338e-11	1.49466e-09	72.2222	31.5714
RAB20	254.637	1.30331	0.197191	6.60937	3.85963e-11	1.49554e-09	301	159.714
RP11-436M15.1	42.4309	2.02118	0.305923	6.60682	3.92652e-11	1.51989e-09	52.9524	16.4286
PKIB	50.8029	3.22429	0.488066	6.60624	3.94193e-11	1.52428e-09	72.7778	8.92857
WASIR2	10.0965	3.95849	0.599321	6.60496	3.97627e-11	1.53598e-09	12.8889	1.14286
FKBP10	1269.64	2.32256	0.351648	6.6048	3.98063e-11	1.53608e-09	1285.03	328.286
UBE2C	13.6322	3.19257	0.48341	6.60426	3.99504e-11	1.54006e-09	18.8413	2.71429
RP11-26L20.4	5.23704	4.51395	0.683608	6.60313	4.02578e-11	1.55032e-09	6.92063	0.357143
LINC01124	6.87115	-1.86042	0.281771	-6.60259	4.04032e-11	1.55432e-09	5.04762	24.3571
TAP1	552.297	1.33577	0.202369	6.60067	4.09292e-11	1.57295e-09	666.095	357
FAM174B	249.124	1.8877	0.286045	6.5993	4.13102e-11	1.58596e-09	303.333	108.571
PDE3B	653.573	2.1584	0.327523	6.59008	4.39589e-11	1.68593e-09	735.143	211.214
PSMB8	259.404	1.19148	0.180803	6.58991	4.40094e-11	1.68615e-09	312.063	172.143
DBF4	77.4736	1.74993	0.26561	6.58834	4.44768e-11	1.7014e-09	95.746	38.2143
CD163	647.888	2.22641	0.337936	6.58827	4.44983e-11	1.7014e-09	851.032	229.357
ALDH1L2	227.817	2.16349	0.328413	6.58771	4.46661e-11	1.70608e-09	255.333	76.8571
DDIT3	305.068	1.49164	0.226472	6.58643	4.50519e-11	1.71907e-09	369.603	176.286
AOAH	117.552	1.57958	0.239902	6.58428	4.57108e-11	1.73918e-09	142.54	61.7143
TPTE2P6	15.2199	4.22451	0.641613	6.58421	4.57319e-11	1.73918e-09	19.4921	1.35714
AC005329.7	64.7777	-1.54458	0.234597	-6.58395	4.58107e-11	1.73918e-09	50.8889	190.214
CTC-231O11.1	53.9386	2.09791	0.318636	6.58402	4.57894e-11	1.73918e-09	60.2222	19
NOP56P3	9.7462	-1.82023	0.276447	-6.58438	4.56797e-11	1.73918e-09	6.87302	29.2143
TNFAIP8	213.046	1.07695	0.163613	6.5823	4.6323e-11	1.75686e-09	249.444	153.286
CES3	137.431	-2.08551	0.316863	-6.58176	4.64922e-11	1.7615e-09	97.6667	499.143
TRAF5	520.065	1.02358	0.155563	6.57987	4.70846e-11	1.78214e-09	606.016	394.929
ALOX5AP	36.8145	1.81344	0.275751	6.57634	4.82172e-11	1.82134e-09	47.6984	17.6429
RP11-357H14.16	250.285	-1.59725	0.242993	-6.57323	4.9235e-11	1.85792e-09	190.937	785.071
HIST1H3B	46.4475	2.55708	0.389086	6.57201	4.96392e-11	1.87129e-09	60.746	13.4286
SLC29A1	1065.41	1.48125	0.22559	6.56615	5.16337e-11	1.94452e-09	1324.05	616.429
FGF9	165.01	-2.86741	0.436714	-6.56588	5.17281e-11	1.94613e-09	82.9524	764.357
PGAP3	291.574	-1.02134	0.155575	-6.5649	5.20675e-11	1.95694e-09	267.143	703.786
AXDND1	26.7876	-2.5022	0.381251	-6.56312	5.26952e-11	1.97855e-09	16.1746	100.571
RP11-403B2.3	17.6784	5.50079	0.838268	6.56209	5.30596e-11	1.99024e-09	17	0.642857
RP11-181E10.3	37.3011	2.05375	0.313009	6.56132	5.33342e-11	1.99854e-09	44.2063	15.1429
GMIP	216.974	1.43177	0.218281	6.55933	5.40506e-11	2.0229e-09	250.302	130.071
SULF2	967.008	1.15736	0.176447	6.55921	5.40921e-11	2.0229e-09	1151.95	659
PLK2	521.349	1.97011	0.300397	6.55835	5.44066e-11	2.03264e-09	680.079	235.571
RBM24	64.4628	2.56741	0.391575	6.55663	5.5038e-11	2.05214e-09	75.5079	18.7143
LINC00310	41.9	-1.96631	0.29989	-6.55677	5.49864e-11	2.05214e-09	29.5873	151.5
TMEM72-AS1	32.7691	-2.05264	0.313107	-6.55572	5.53756e-11	2.06268e-09	22.619	123.143
HIST1H2AL	12.8234	2.76624	0.422026	6.55466	5.5767e-11	2.0752e-09	17.5714	3.35714
KIF14	17.5179	2.82766	0.431453	6.5538	5.60917e-11	2.08522e-09	24.4762	4.42857
TACC3	198.554	1.2273	0.187283	6.55317	5.63279e-11	2.09193e-09	220.413	130.214
HDGFRP3	836.451	1.34203	0.204811	6.55256	5.65583e-11	2.09841e-09	872.286	493.929
ADORA2A-AS1	52.2032	-1.71909	0.262368	-6.55219	5.6699e-11	2.10156e-09	39.5873	169.214
TMSB10	1299.18	1.25702	0.191943	6.54895	5.79433e-11	2.14344e-09	1641.35	829.429
RP11-22C11.2	7.3345	-2.63689	0.402639	-6.549	5.79243e-11	2.14344e-09	4.15873	33.4286
FAS	228.347	1.31651	0.201063	6.54775	5.84095e-11	2.15727e-09	266.048	145.571
VSIG4	119.743	1.95745	0.298953	6.5477	5.84318e-11	2.15727e-09	156.857	51.8571
FABP5	103.408	1.99841	0.305297	6.54579	5.91836e-11	2.18287e-09	157.587	41.9286
ANKRD26P3	42.2067	6.51532	0.995767	6.54301	6.02929e-11	2.22161e-09	87.5556	0.714286
RP11-561N12.5	11.4444	5.30593	0.811057	6.542	6.07031e-11	2.23453e-09	21.0794	0.5
CLN6	851.283	1.44235	0.220533	6.54028	6.14054e-11	2.25817e-09	1002.44	502.5
CXCL5	7.22621	5.2383	0.801106	6.53884	6.19988e-11	2.27776e-09	9.80952	0.285714
TGFBR1	939.122	1.23485	0.188867	6.5382	6.2262e-11	2.28519e-09	1159.05	623.929
CYFIP2	3066.4	-1.44296	0.220729	-6.53723	6.26676e-11	2.29783e-09	2401.24	8412.64
IL2RG	100.431	1.74975	0.267678	6.53678	6.28584e-11	2.30258e-09	128.651	50.3571
SERPINB8	57.6146	1.29043	0.197473	6.53474	6.37196e-11	2.33185e-09	68.3016	35.5714
ITGAL	283.33	1.6178	0.247621	6.53336	6.43087e-11	2.35112e-09	343.063	150.286
RP11-193J6.1	32.2335	-2.68051	0.410292	-6.53317	6.43913e-11	2.35185e-09	18.2857	156.643
MST1	437.104	-1.33992	0.205127	-6.53216	6.48272e-11	2.36317e-09	351.508	1228.71
LLGL2	821.638	-1.46462	0.224231	-6.53176	6.49996e-11	2.36716e-09	680.524	2465.64
SYT3	152.038	3.86762	0.592208	6.53085	6.53993e-11	2.37941e-09	200.746	19.7143
EHD3	367.41	-1.25022	0.191461	-6.5299	6.58115e-11	2.39209e-09	329.968	992.714
GPIHBP1	487.33	3.14055	0.481089	6.52801	6.66513e-11	2.42027e-09	631.921	96.0714
CD5	57.0918	1.45436	0.222829	6.52681	6.71848e-11	2.43728e-09	70.4286	33.3571
RP11-650J17.1	33.7825	2.81472	0.431509	6.52298	6.89248e-11	2.49799e-09	40.2857	8.42857
ITGBL1	273.815	2.52707	0.387558	6.52049	7.00782e-11	2.53734e-09	356.619	89.9286
SPHK1	148.697	2.15384	0.330341	6.52007	7.02761e-11	2.54192e-09	175.778	58.7143
RP11-165F24.2	14.2908	-2.00209	0.307072	-6.51993	7.03399e-11	2.54192e-09	9.60317	52
SCN1B	328.302	1.79527	0.275433	6.51798	7.12601e-11	2.57269e-09	352.317	136.286
LY9	51.0463	2.24852	0.345003	6.51739	7.15413e-11	2.58036e-09	65.5079	19.7857
LINC00861	110.67	2.01503	0.309289	6.51503	7.2675e-11	2.61874e-09	131	42.9286
WAS	89.9223	1.6112	0.247349	6.51386	7.32448e-11	2.63422e-09	107.698	46.5714
SLITRK5	146.048	3.15367	0.484142	6.51393	7.32108e-11	2.63422e-09	190.746	29.9286
PCOLCE-AS1	14.5326	-1.70973	0.262668	-6.50908	7.56122e-11	2.71676e-09	11.1111	45.5
ZNF385C	20.0758	-1.31363	0.201941	-6.50501	7.76897e-11	2.78873e-09	16.9683	53.9286
CATIP	28.1145	-2.06672	0.317826	-6.50266	7.89096e-11	2.82982e-09	19.3175	104.071
LINC01272	24.6478	2.54372	0.391242	6.50166	7.9438e-11	2.84605e-09	28.9841	6.35714
CST2	54.5339	7.04323	1.0835	6.50041	8.01003e-11	2.86704e-09	162.032	0.785714
MASP1	476.136	2.18734	0.336505	6.50017	8.02276e-11	2.86886e-09	487.111	131.571
MARCO	12.3916	3.20938	0.493752	6.49998	8.033e-11	2.86979e-09	16.1111	2.21429
KPNA2	142.052	1.54936	0.238453	6.49756	8.16337e-11	2.91359e-09	184.19	79.7143
LRTM1	6.01405	-2.29578	0.353431	-6.49569	8.26524e-11	2.94245e-09	3.7619	26
RP11-541M12.6	7.68216	2.07432	0.31934	6.49565	8.26772e-11	2.94245e-09	9.06349	2.92857
ZNF469	528.108	1.84438	0.283982	6.49472	8.31877e-11	2.95781e-09	606.254	241.357
UPB1	142.823	-2.56134	0.394556	-6.4917	8.48733e-11	3.01204e-09	80.0952	602.929
ANXA13	126.272	2.8745	0.442928	6.48977	8.59696e-11	3.04806e-09	163.238	26.7143
CTD-2515H24.4	24.6952	-2.63843	0.406593	-6.48913	8.63334e-11	3.05807e-09	13.2857	102.286
TUBA1C	621.159	1.42968	0.220335	6.48868	8.65928e-11	3.06437e-09	795.222	365.714
ZNF705D	22.2762	6.91517	1.0658	6.48826	8.68325e-11	3.06996e-09	31.619	0.357143
RP11-321G12.1	5.8326	-2.7879	0.429701	-6.488	8.69857e-11	3.07249e-09	3.19048	28.7143
AATBC	392.923	2.86366	0.441578	6.48506	8.86961e-11	3.12995e-09	452.206	92.8571
IL9R	18.2856	3.28402	0.506569	6.48286	9.00023e-11	3.17307e-09	22.9206	3.42857
ADAP1	162.031	-1.51204	0.233291	-6.48135	9.09067e-11	3.19894e-09	129.651	500.643
ORC6	35.8328	1.771	0.273318	6.47964	9.19402e-11	3.23228e-09	40.2063	16
LINC01444	23.9322	4.1493	0.640386	6.47937	9.21038e-11	3.23501e-09	25.0476	2
ESPN	268.453	-2.64257	0.407926	-6.47807	9.29002e-11	3.25993e-09	156.143	1224
ENAH	1090.42	1.02846	0.158848	6.47446	9.51533e-11	3.33588e-09	1265.25	815.786
RP4-753M9.1	19.1518	-2.77581	0.428762	-6.47402	9.54278e-11	3.34238e-09	10.1905	92.4286
LAMP5	65.1556	3.78263	0.584342	6.47331	9.58777e-11	3.355e-09	89.7143	9.07143
PTPN22	40.5454	1.94776	0.301065	6.46955	9.82933e-11	3.42994e-09	52.3175	17.8571
TMEM45B	61.7404	-2.12754	0.328883	-6.46899	9.86578e-11	3.43947e-09	39.8571	236.429
TGFB2	252.357	1.7923	0.277116	6.46769	9.95099e-11	3.46595e-09	319.635	120.357
EGF	1064.57	-3.15187	0.487442	-6.46615	1.00535e-10	3.4984e-09	523.429	5705.14
CA12	2420.21	-2.88385	0.446024	-6.46568	1.00846e-10	3.50597e-09	1307.7	11707.4
HSPB2	129.464	1.80104	0.278602	6.46457	1.01585e-10	3.52842e-09	149.444	62.5
RP11-874J12.4	21.6685	3.00544	0.465043	6.46272	1.02835e-10	3.56853e-09	27.1429	5
ESRP2	260.329	-1.57935	0.244395	-6.46228	1.03134e-10	3.57559e-09	201.492	831.571
NPBWR1	15.6509	6.45145	0.998434	6.46157	1.03622e-10	3.58921e-09	26.0952	0.214286
CENPE	35.7189	2.0598	0.318871	6.45966	1.0494e-10	3.63152e-09	47.2857	14.0714
SUSD2	261.59	-1.98437	0.307227	-6.45896	1.05424e-10	3.64489e-09	199.841	926.214
RNF150	442.39	-1.60062	0.247835	-6.45842	1.05803e-10	3.65128e-09	361.032	1405.14
MYBL2	17.9101	2.79507	0.432793	6.45822	1.05941e-10	3.65269e-09	23.1429	4.35714
EPHX2	539.826	-1.39863	0.216576	-6.45789	1.0617e-10	3.65325e-09	469.492	1539.64
LMO1	5.87516	-2.90361	0.449618	-6.45795	1.06128e-10	3.65325e-09	2.74603	28.0714
RP11-286N22.16	7.53001	-2.89273	0.447944	-6.45778	1.06249e-10	3.65325e-09	3.55556	38.9286
ASS1P10	9.31358	-2.63003	0.407399	-6.45566	1.07746e-10	3.69793e-09	5.20635	41.0714
TMEM151A	42.442	5.57641	0.863977	6.45435	1.08688e-10	3.72685e-09	52.2222	1.57143
PAX5	33.8079	2.93641	0.455086	6.45243	1.1007e-10	3.77079e-09	45.5079	8.14286
CLU	5964.01	1.99366	0.309046	6.451	1.11111e-10	3.803e-09	7583.24	2502.36
NCAPH	14.326	2.33202	0.361555	6.44996	1.11882e-10	3.82591e-09	18.8254	5.14286
HDHD3	272.788	-1.03755	0.160867	-6.44974	1.1204e-10	3.82782e-09	253.127	649.571
CNN2P6	17.6576	5.40916	0.839	6.44715	1.13972e-10	3.89026e-09	19.381	0.642857
SLC8A1	1082.4	-1.78957	0.277585	-6.44693	1.14135e-10	3.89231e-09	829.73	3422.86
RP11-337N6.2	10.482	-2.48329	0.385451	-6.44255	1.17481e-10	3.99553e-09	6	42.4286
HSD11B2	1408.87	-2.86395	0.444555	-6.4423	1.17677e-10	3.99856e-09	764.952	6840.21
DEGS1	453.201	1.45049	0.225179	6.44149	1.18309e-10	4.0164e-09	587.492	261.429
RHOBTB2	3179.88	2.75476	0.427891	6.43799	1.21065e-10	4.10624e-09	3804.6	732.429
NUGGC	31.4949	-2.10622	0.327229	-6.43654	1.22228e-10	4.14197e-09	20.6667	113.357
MPEG1	552.161	1.5642	0.243058	6.43547	1.23089e-10	4.16738e-09	708.683	303.857
SLAMF6	36.5285	2.03674	0.316494	6.43532	1.23211e-10	4.16776e-09	46.0159	14.3571
APCDD1L	46.161	-1.52935	0.237694	-6.43409	1.24216e-10	4.19798e-09	37.619	139.643
FICD	161.786	1.05388	0.163856	6.43173	1.26157e-10	4.25972e-09	188.46	121.929
ICOS	15.7094	2.58102	0.401327	6.4312	1.26597e-10	4.27073e-09	20.5873	4.78571
IL2RA	31.0278	2.36088	0.367243	6.42865	1.28741e-10	4.33529e-09	40.7937	10.2143
KLKP1	9.4174	6.39547	0.994888	6.42834	1.29008e-10	4.34037e-09	12	0
ALOX15B	9.95207	4.35889	0.678161	6.42751	1.29712e-10	4.36017e-09	11.4444	0.785714
AGPAT9	229.508	-1.95099	0.303624	-6.42566	1.31301e-10	4.40743e-09	172.317	792.286
FAM195A	479.668	-1.19303	0.185668	-6.4256	1.31353e-10	4.40743e-09	390.429	1200.36
CTD-2012K14.8	16.5193	-1.41359	0.220049	-6.42398	1.32756e-10	4.45051e-09	14.1587	46.8571
RP11-343C2.7	8.32671	4.94524	0.769883	6.42337	1.33292e-10	4.4645e-09	9.87302	0.357143
FAM159A	37.704	2.52955	0.393822	6.42307	1.33549e-10	4.46914e-09	43.4603	10.6429
CEACAM1	358.755	-1.73517	0.270276	-6.42	1.36277e-10	4.55232e-09	273.095	1165.29
PGM2L1	225.589	1.66419	0.259322	6.41747	1.38553e-10	4.62423e-09	289.667	118.286
FLJ12825	29.6436	-1.29387	0.20165	-6.41638	1.39549e-10	4.65333e-09	24.1111	79.8571
HIF1A	2582.76	1.42199	0.22163	6.41604	1.39867e-10	4.65568e-09	3092.37	1543.07
MAP4K1	73.7567	1.61287	0.25138	6.41606	1.39849e-10	4.65568e-09	86.4603	39.1429
HOXB-AS2	55.9297	-1.39984	0.21819	-6.41571	1.40165e-10	4.66145e-09	46.7778	162.143
MAFF	1056.32	2.39169	0.372863	6.41439	1.41387e-10	4.69792e-09	1231.32	331.786
RPS2	3177.78	1.12468	0.175368	6.41326	1.4244e-10	4.72873e-09	3651.41	2227.07
RP11-1055B8.4	147.493	-1.87991	0.293374	-6.4079	1.47536e-10	4.8936e-09	102.73	519.357
CFAP70	277.917	-1.49744	0.233693	-6.40771	1.47721e-10	4.8954e-09	216.46	746.643
SACS-AS1	12.5225	3.70173	0.577767	6.40696	1.48452e-10	4.91528e-09	15.5238	1.78571
EMR1	9.16953	2.22949	0.348	6.4066	1.48804e-10	4.9226e-09	11.1429	3.14286
PLK5	93.4461	4.84824	0.756847	6.40584	1.49547e-10	4.9428e-09	102.619	6.07143
LRRC20	83.7397	1.23542	0.192878	6.40521	1.50165e-10	4.95888e-09	99.3175	55.3571
BAX	359.659	1.06817	0.166844	6.4022	1.5315e-10	5.04416e-09	388.905	254.214
CACNA2D3-AS1	6.91438	-2.30891	0.360661	-6.4019	1.53455e-10	5.04976e-09	4.2381	29.5
IKBIP	121.724	1.28508	0.200742	6.40167	1.53689e-10	5.05304e-09	143.349	76.2857
NIPAL4	33.6286	2.75461	0.430314	6.40141	1.53946e-10	5.05704e-09	38.5397	7.78571
FAM131C	76.7564	-2.32594	0.363356	-6.40125	1.54105e-10	5.05787e-09	45.7619	315.786
TMPRSS2	273.255	-2.58339	0.403804	-6.39764	1.578e-10	5.17458e-09	163.524	1248.93
DEPDC1	12.5605	3.55293	0.555406	6.39699	1.58465e-10	5.19186e-09	17.5714	2
LAMP3	22.7704	2.3411	0.366098	6.39473	1.60836e-10	5.25579e-09	26.2381	7.14286
SLC52A3	62.2356	-2.37345	0.371325	-6.39184	1.639e-10	5.35127e-09	41.0317	272.071
SIGLEC7	18.7759	2.04882	0.320653	6.38951	1.66413e-10	5.42859e-09	23.9524	7.42857
FCRL3	31.9175	2.61752	0.409774	6.38771	1.68385e-10	5.48814e-09	41.619	9.21429
LAMC1	2310.26	1.1653	0.182544	6.38367	1.72893e-10	5.63021e-09	2836.3	1598.5
SLC23A3	319.519	-1.88516	0.295403	-6.38168	1.75158e-10	5.69901e-09	226.968	1037.79
UHRF1	74.0869	1.5343	0.240445	6.38108	1.75844e-10	5.71638e-09	90.9683	43
DUSP15	133.79	-1.92861	0.302257	-6.38069	1.76289e-10	5.72588e-09	86.5238	464.071
NPW	37.4492	3.71581	0.582428	6.37986	1.77245e-10	5.74203e-09	52.4286	5.14286
HOXB5	176.427	-1.4189	0.22255	-6.37563	1.82208e-10	5.89772e-09	146.746	528.571
AC007750.5	7.83547	4.40091	0.690528	6.37326	1.85051e-10	5.97851e-09	10	0.642857
RP11-387A1.5	27.5085	-1.94015	0.304491	-6.37178	1.8685e-10	6.02721e-09	20.3175	99.9286
HIP1	817.771	-1.03976	0.163208	-6.37078	1.88071e-10	6.06138e-09	763.778	2007.64
LPAR5	81.239	1.49119	0.234104	6.3698	1.89273e-10	6.09488e-09	91.8095	41.8571
NOV	226.674	2.29906	0.361059	6.36754	1.92082e-10	6.18005e-09	320.825	82.5
CALB1	436.445	-3.11559	0.489333	-6.36701	1.92746e-10	6.19079e-09	211.524	2123.43
RASAL3	195.27	1.73141	0.271942	6.36685	1.92944e-10	6.19186e-09	218.46	98
FMNL1	381.697	1.60548	0.252274	6.36404	1.96515e-10	6.29032e-09	433.635	203.714
SLC18A2	35.026	2.69351	0.423296	6.36318	1.97621e-10	6.32033e-09	47.0476	9.57143
SLC44A2	1119.43	-1.07355	0.16876	-6.36139	1.9993e-10	6.38875e-09	1038.9	2782.57
ZBED2	19.5332	2.02386	0.318226	6.35982	2.01986e-10	6.44896e-09	23.5079	7.92857
FAM26F	17.2027	2.64088	0.415254	6.35968	2.02175e-10	6.4495e-09	21.8571	4.78571
ATP6V1B1-AS1	19.0289	-3.00529	0.472644	-6.35847	2.03769e-10	6.49482e-09	9.15873	91.6429
IL10RA	622.28	1.562	0.2457	6.35737	2.05239e-10	6.53613e-09	739.667	346.571
SLC5A2	260.102	-2.33105	0.36672	-6.35649	2.06415e-10	6.56801e-09	165.746	1085.07
SLC4A11	134.495	-2.52499	0.397265	-6.35595	2.07142e-10	6.58557e-09	78.381	717.643
RP4-669P10.20	9.58814	-1.45688	0.229271	-6.3544	2.09243e-10	6.64674e-09	7.47619	27.5
FCGR2A	345.472	1.57125	0.247309	6.35338	2.10639e-10	6.6798e-09	424.603	186.5
HMGB3P22	6.3019	-1.50728	0.237236	-6.3535	2.10471e-10	6.6798e-09	4.88889	16.2857
RBP5	449.37	-1.64652	0.259208	-6.35212	2.12372e-10	6.72905e-09	361.333	1437
CD244	16.411	1.77791	0.279988	6.34994	2.15404e-10	6.81362e-09	20.0952	7.92857
KIF18B	22.938	2.60026	0.409625	6.34791	2.18263e-10	6.89825e-09	30.127	6.78571
COMP	117.415	4.13654	0.652167	6.34277	2.25671e-10	7.1264e-09	181	13.4286
RP11-436K8.1	35.0167	3.82888	0.603875	6.34052	2.28991e-10	7.21907e-09	42.8571	4.92857
MECOM	841.157	-1.96778	0.310444	-6.33859	2.31871e-10	7.30373e-09	617.19	3056.57
ULK4P3	9.56033	2.91981	0.460678	6.33807	2.32663e-10	7.31828e-09	12.2381	2.07143
SEC24D	382.142	1.18182	0.186517	6.33626	2.35411e-10	7.39044e-09	461.286	270.643
RP1-168L15.5	34.3747	-1.54728	0.244312	-6.33324	2.40072e-10	7.53049e-09	23.3492	97.2857
CRHBP	51.7654	-2.61227	0.412609	-6.33109	2.43429e-10	7.62942e-09	31.7143	243.357
TCF24	6.81348	-2.67508	0.422617	-6.3298	2.45473e-10	7.68064e-09	3.74603	31.2857
C21orf62-AS1	32.4849	-1.28913	0.203727	-6.32772	2.48817e-10	7.7788e-09	25.5397	82.8571
AP000696.2	9.42268	-2.79727	0.442112	-6.32707	2.49866e-10	7.80509e-09	5.09524	47.3571
PLCB4	446.193	2.05411	0.324701	6.32616	2.51334e-10	7.84441e-09	558.333	177.286
WI2-87327B8.2	11.987	3.97221	0.62792	6.32598	2.51626e-10	7.84701e-09	15.8889	1.35714
MTNR1B	72.3633	5.45718	0.862769	6.32519	2.52922e-10	7.88088e-09	133.524	2.85714
PMCHL2	10.9018	4.05991	0.641935	6.32448	2.54083e-10	7.9105e-09	12.254	1.14286
ZYX	1386.07	1.06203	0.167945	6.32367	2.55431e-10	7.94587e-09	1571.38	1056.64
CASZ1	504.728	-1.79117	0.283346	-6.32149	2.5906e-10	8.05208e-09	376.952	1743
SHANK2	798.366	-1.48491	0.234953	-6.32005	2.61476e-10	8.12047e-09	666.27	2360.5
SH3RF3	744.138	1.97643	0.3129	6.3165	2.67554e-10	8.28446e-09	871.921	295.857
AKR1B10	135.873	5.21012	0.824821	6.31668	2.67249e-10	8.28446e-09	343.984	5.21429
RP11-1399P15.1	46.7372	2.61663	0.414256	6.31645	2.67639e-10	8.28446e-09	55.0317	13.6429
CASC15	798.776	1.41721	0.224397	6.31566	2.69004e-10	8.31985e-09	865.556	456.643
DNTT	24.4159	5.54105	0.877508	6.31453	2.7099e-10	8.36747e-09	8.46032	0.0714286
CD28	76.6725	1.89331	0.299847	6.31425	2.71483e-10	8.37581e-09	96.7143	34.8571
OR10AB1P	10.62	-2.17574	0.344638	-6.3131	2.73496e-10	8.42408e-09	6.93651	36.9286
PLLP	214.473	-1.09062	0.172765	-6.31276	2.74099e-10	8.42662e-09	191.952	535.286
FBXO24	15.4851	-1.56104	0.247285	-6.31269	2.74223e-10	8.42662e-09	11.6984	49.5
STX3	1521.87	1.10476	0.175009	6.31255	2.74476e-10	8.42662e-09	1701.71	976
RGS19	104.094	1.14687	0.181681	6.31257	2.74444e-10	8.42662e-09	118.238	72.9286
AC006273.5	26.2527	-1.90542	0.301859	-6.31229	2.74941e-10	8.43401e-09	18.7143	93.8571
TMEM236	34.9181	2.14244	0.339442	6.31166	2.76066e-10	8.46158e-09	34.2063	10.4286
HIST1H2BO	16.6302	2.66516	0.422357	6.31021	2.78663e-10	8.53424e-09	23.2857	4.71429
PDE10A	373.1	-1.80152	0.28563	-6.30719	2.84139e-10	8.68775e-09	280.032	1263.86
RP11-458D21.1	21.1079	-1.27178	0.201674	-6.30613	2.86099e-10	8.74056e-09	17.8889	54.6429
C12orf5	138.194	1.10536	0.175311	6.30513	2.87944e-10	8.78977e-09	156.873	96.0714
NRTN	112.569	-1.99246	0.31611	-6.30306	2.91821e-10	8.90091e-09	75.8571	369.571
SLC5A11	22.5031	-2.72444	0.432444	-6.3001	2.97455e-10	9.05801e-09	12.2063	99.7143
MCOLN1	302.052	1.22746	0.194889	6.29827	3.00985e-10	9.15809e-09	326.619	192.643
SULF1	1094.72	2.154	0.342037	6.29755	3.02381e-10	9.18568e-09	1499.13	403.929
AMICA1	218.509	1.65919	0.263464	6.29757	3.02352e-10	9.18568e-09	258.27	112.786
UBASH3A	29.8518	2.07439	0.329455	6.29641	3.04626e-10	9.2464e-09	37.1905	12.2143
RP11-367J11.3	24.0476	-1.62157	0.257551	-6.29612	3.05188e-10	9.25597e-09	15.5556	63.2143
CA4	42.0028	-2.40941	0.382885	-6.29276	3.1186e-10	9.45071e-09	27.8095	184.143
NCAPG	26.4924	2.6586	0.422496	6.29261	3.12164e-10	9.45228e-09	35.9841	6.92857
TNNI3K	4.71262	-2.37095	0.376921	-6.29032	3.16821e-10	9.58554e-09	2.80952	19.8571
ZYG11A	41.2717	-2.73674	0.435188	-6.28863	3.20274e-10	9.6796e-09	22.1587	178.929
SRGAP3-AS2	10.6469	-1.5656	0.24896	-6.28855	3.20445e-10	9.6796e-09	8.38095	33.2857
NCF1	66.1563	1.40322	0.223145	6.28837	3.20814e-10	9.68245e-09	81.0476	41.0714
RBM17P4	17.0502	-1.18692	0.188752	-6.28825	3.21055e-10	9.68245e-09	15.0794	45.7143
SLC9A3R2	546.55	-1.53145	0.243586	-6.2871	3.23461e-10	9.74717e-09	445.317	1651.71
PRKCB	331.406	2.16044	0.343784	6.28429	3.29345e-10	9.91653e-09	404.984	128.786
EMB	193.183	1.65079	0.262746	6.28283	3.32462e-10	1.00024e-08	241.984	96.8571
IL21R	68.5854	1.97604	0.314597	6.28118	3.36016e-10	1.01012e-08	86.127	29.0714
RP11-420L9.5	267.139	2.14292	0.341317	6.27838	3.42127e-10	1.02767e-08	241.254	93.3571
SEPHS2	2576.13	1.81157	0.288574	6.27765	3.43739e-10	1.03168e-08	3214.33	1146.5
FAM107A	221.999	-1.52002	0.242142	-6.27739	3.44306e-10	1.03256e-08	183.27	653.786
RP11-119H12.4	12.745	2.69255	0.429041	6.27573	3.48005e-10	1.04282e-08	16.619	3.57143
HIST1H2BL	13.723	2.44441	0.389606	6.27405	3.51774e-10	1.05328e-08	19.0317	4.28571
BPI	5.32468	-2.84521	0.453543	-6.27329	3.535e-10	1.0576e-08	2.93651	25.9286
EBI3	20.3241	1.74937	0.278891	6.2726	3.55064e-10	1.06143e-08	23.9683	9.85714
EOMES	31.7732	2.0557	0.327788	6.27141	3.57786e-10	1.06872e-08	39.8095	12.7143
RP11-511B23.2	9.07095	-2.1916	0.349468	-6.27125	3.58165e-10	1.069e-08	5.79365	35.9286
TLR8	28.1653	2.11864	0.337856	6.27085	3.59092e-10	1.07092e-08	35.4762	10.4286
RTCA-AS1	12.3402	-1.47358	0.235002	-6.27048	3.59927e-10	1.0719e-08	8.96825	31.5
MBNL1-AS1	132.932	1.49858	0.238991	6.27046	3.59993e-10	1.0719e-08	153.492	73.3571
APOBEC3G	142.284	1.12247	0.179023	6.27	3.61051e-10	1.0742e-08	159.698	97.8571
CMTM2	10.5511	-2.11052	0.336625	-6.26965	3.61854e-10	1.07488e-08	6.60317	38.9286
RP4-671O14.7	15.243	1.86832	0.297993	6.26966	3.61829e-10	1.07488e-08	15.9841	6.07143
RAB7A	2123.07	1.32961	0.212152	6.26726	3.67463e-10	1.08982e-08	2656.11	1301.64
ABCD1	376.952	1.27196	0.202969	6.26675	3.68659e-10	1.09251e-08	402.397	243.214
CXCR4	407.417	1.85877	0.296712	6.26454	3.73929e-10	1.10725e-08	521.825	189.929
KLRK1	41.1637	1.73406	0.276815	6.26432	3.74461e-10	1.10795e-08	49.8254	19.7143
CDH7	146.934	5.76927	0.921147	6.26314	3.77306e-10	1.11508e-08	168.159	3.78571
LAMB4	31.69	-2.37787	0.379672	-6.26295	3.77763e-10	1.11508e-08	20.4603	154.357
AGAP2	97.2979	1.57502	0.25148	6.263	3.77643e-10	1.11508e-08	111.984	53.0714
NACAP3	4.87969	-2.79791	0.446845	-6.26147	3.81365e-10	1.12395e-08	2.50794	23.7857
FAM220CP	27.3006	-2.38839	0.381551	-6.25968	3.85765e-10	1.13603e-08	17.4921	113.214
HIST1H2BN	69.4544	1.12988	0.180595	6.25644	3.93875e-10	1.159e-08	80.6667	45.7143
FAM49A	178.1	2.08591	0.33343	6.25592	3.95177e-10	1.16192e-08	229.397	70.4286
CKM	4.40694	-2.35378	0.376449	-6.25257	4.03744e-10	1.18525e-08	2.7619	19
RNF125	115.15	1.43771	0.229975	6.2516	4.06278e-10	1.19099e-08	126.444	62.8571
LILRB3	28.7952	1.96471	0.314274	6.25158	4.06332e-10	1.19099e-08	33.9048	12.8571
NR1H4	254.733	1.44401	0.231	6.25111	4.07555e-10	1.19271e-08	315.683	148.857
RP5-1092L12.2	33.525	2.7709	0.443261	6.25118	4.0736e-10	1.19271e-08	31.1905	5.78571
AP000322.53	7.97537	-3.00765	0.481188	-6.25048	4.092e-10	1.19659e-08	4.03175	39.0714
KIF20A	19.4169	2.2232	0.355704	6.25015	4.10067e-10	1.19819e-08	26.1905	7.07143
APOBEC3D	74.8953	1.51986	0.24319	6.24969	4.11266e-10	1.19983e-08	92.7143	40.7143
MCCD1	12.6714	-2.9137	0.466263	-6.24904	4.12975e-10	1.20388e-08	6.44444	62
RP13-895J2.6	38.5828	-2.77093	0.443507	-6.24778	4.16336e-10	1.21274e-08	20.4127	188.929
TRBC2	103.282	1.88389	0.301551	6.24733	4.17528e-10	1.21527e-08	134.444	45.2857
SLCO5A1	25.6485	2.1021	0.336574	6.24557	4.22256e-10	1.22807e-08	32.6984	10.8571
PTAFR	139.849	1.38949	0.222518	6.24437	4.25498e-10	1.23655e-08	168.841	83.2857
DUSP9	391.396	-3.47667	0.556865	-6.24329	4.28464e-10	1.2442e-08	146.46	2266.21
WFIKKN1	95.1442	-1.62582	0.260525	-6.24057	4.3599e-10	1.26508e-08	70.2698	292.714
RN7SL359P	10.1564	-2.1642	0.346819	-6.24014	4.37174e-10	1.26753e-08	6.2381	38.7857
RP11-662I13.3	10.6756	2.44636	0.392065	6.23967	4.38498e-10	1.27039e-08	13.3016	3.5
KIF21B	213.449	1.37046	0.219641	6.23953	4.38879e-10	1.27052e-08	240.143	129.857
FCHO1	43.5292	1.56326	0.250611	6.23781	4.4373e-10	1.28357e-08	51.7302	23.5
CD8B	22.006	2.30436	0.369458	6.23715	4.45618e-10	1.28804e-08	28.1905	7.35714
CCND2	1379.06	1.34932	0.216396	6.2354	4.50633e-10	1.30053e-08	1647.51	875.929
KCNN4	31.5579	1.90455	0.305591	6.23234	4.59515e-10	1.32413e-08	39.1429	14.4286
RP11-212I21.2	4.02564	4.42472	0.710018	6.23184	4.60997e-10	1.32738e-08	4.04762	0.142857
TCHH	28.5691	2.94122	0.471997	6.23144	4.62154e-10	1.32969e-08	30.6984	6.14286
TLR10	25.4121	1.9494	0.312881	6.23048	4.65004e-10	1.33687e-08	31.619	11.1429
RELT	245.908	1.57901	0.253444	6.23022	4.65777e-10	1.33807e-08	284.841	137.786
CNTN3	551.808	2.25393	0.361825	6.22932	4.6847e-10	1.34477e-08	720.873	189.214
TIGD2	255.622	1.38891	0.222972	6.22908	4.69181e-10	1.34579e-08	293.333	136.857
PDZD3	234.365	-2.52861	0.405962	-6.22867	4.70398e-10	1.34768e-08	140.667	1034.29
RP11-11N9.4	38.0075	2.78591	0.447276	6.22862	4.7056e-10	1.34768e-08	50.2698	8.57143
ADAMTS2	644.477	1.82348	0.29285	6.22667	4.76459e-10	1.36354e-08	694.794	281.214
THEMIS	46.4618	1.97562	0.317308	6.22618	4.77937e-10	1.36673e-08	58.3016	20.2857
LY86	24.9425	1.68475	0.270639	6.22506	4.81356e-10	1.37546e-08	31.2857	12.4286
NAMPT	1007.62	1.624	0.260912	6.22433	4.83618e-10	1.38087e-08	1274.44	544.429
CXCL6	49.1742	3.7682	0.605462	6.22368	4.85627e-10	1.38555e-08	65.6508	7.42857
TLL1	348.127	2.26858	0.364591	6.22226	4.90039e-10	1.39708e-08	442.889	114.786
HYKK	95.9054	-1.08727	0.174779	-6.22081	4.94596e-10	1.409e-08	85.1429	230
PIP	5.07915	5.32721	0.856788	6.21765	5.04661e-10	1.43549e-08	8.22222	0.0714286
AC096558.1	32.1678	2.02667	0.326029	6.21621	5.0931e-10	1.44653e-08	38.1746	13
KCNC4	1065.23	-1.45941	0.234782	-6.216	5.09973e-10	1.44731e-08	844.714	3041.71
GARS	501.617	1.12469	0.180956	6.21524	5.12447e-10	1.45118e-08	585.492	343.857
CIAPIN1P	10.6411	-1.69333	0.272438	-6.21546	5.11756e-10	1.45118e-08	7.39683	33.7143
RP11-361L15.3	52.436	-1.87657	0.301931	-6.21523	5.12495e-10	1.45118e-08	38.0952	164.429
LACTB2	144.939	1.67589	0.269687	6.21419	5.15906e-10	1.45974e-08	192.254	70.7143
FGF2	390.406	1.16589	0.187647	6.21319	5.19184e-10	1.4657e-08	423.444	263.143
SIRPB2	35.4002	1.82237	0.2933	6.21334	5.1869e-10	1.4657e-08	41.5079	14.3571
CTD-2515H24.2	62.3104	-2.86817	0.461623	-6.21323	5.19053e-10	1.4657e-08	33.2698	293.357
GBP5	150.815	1.91456	0.308228	6.21149	5.24848e-10	1.47725e-08	190.81	66.9286
RP11-2I17.4	5.08681	-2.20962	0.355726	-6.21159	5.24524e-10	1.47725e-08	3.14286	18.2857
NT5DC4	7.7004	4.05123	0.652283	6.21085	5.26999e-10	1.48219e-08	9.44444	0.857143
ARHGEF4	226.82	2.71952	0.43794	6.20979	5.30553e-10	1.49107e-08	285.698	59.1429
F11	69.698	-3.17912	0.512029	-6.20887	5.33681e-10	1.49874e-08	33.0952	375.286
SPOCK2	713.216	-1.70738	0.274999	-6.20869	5.34295e-10	1.49934e-08	580.079	2329.86
UPP2	78.6693	-2.52082	0.406205	-6.20578	5.4425e-10	1.52614e-08	41.5079	342.214
ZFAND5	2561.76	1.03361	0.166631	6.20298	5.54031e-10	1.55175e-08	2833.62	1831.21
ANKS1B	94.7094	-1.13051	0.182255	-6.20293	5.54211e-10	1.55175e-08	85.4921	235.571
CPLX3	116.185	7.57198	1.22102	6.20134	5.5985e-10	1.56637e-08	248.175	1.28571
OSBPL1A	696.451	1.0329	0.16657	6.20101	5.61028e-10	1.5685e-08	765.762	499
HAVCR2	299.84	1.65309	0.266762	6.19689	5.75885e-10	1.60645e-08	354.079	141.643
C1orf145	33.2978	-1.30846	0.211181	-6.19593	5.79435e-10	1.61395e-08	27.7302	92.8571
ALS2CL	1004.13	-1.6553	0.267185	-6.19534	5.81582e-10	1.61873e-08	777.063	3208.86
ARHGAP11B	28.5604	1.69413	0.273505	6.19416	5.85956e-10	1.62969e-08	34.4127	14.5
GALNT12	101.188	1.41729	0.228874	6.19245	5.92354e-10	1.64384e-08	117.46	57.7143
CSF1R	799.115	1.38696	0.224002	6.19174	5.9503e-10	1.65004e-08	975.937	486.929
CAP2	144.095	1.18485	0.191396	6.19054	5.99599e-10	1.66149e-08	174.54	96.6429
RP5-1086K13.1	54.0704	-1.30394	0.210669	-6.18952	6.03477e-10	1.671e-08	46.0317	147.714
GPR137B	874.563	1.57097	0.253875	6.18799	6.09378e-10	1.6861e-08	1029.57	446.214
BSND	139.453	-3.46477	0.560019	-6.18688	6.1368e-10	1.69582e-08	57.8571	810.571
TTC36	23.1162	-2.16529	0.349982	-6.18685	6.13796e-10	1.69582e-08	13.873	82.7143
RP11-999E24.3	18.8679	-1.70575	0.27581	-6.18451	6.22961e-10	1.71861e-08	14.4762	57.4286
KSR2	214.847	-1.95271	0.315831	-6.18278	6.29827e-10	1.73628e-08	118.952	605.143
LA16c-329F2.1	14.1955	-1.5712	0.254217	-6.18054	6.38834e-10	1.75982e-08	9.28571	36.1429
RP11-111A21.1	19.461	-1.24163	0.200975	-6.17803	6.49061e-10	1.78668e-08	15.7937	49.2143
TESPA1	32.844	1.94661	0.315173	6.17633	6.56104e-10	1.80474e-08	40.3651	13.8571
GPR37	124.291	3.31143	0.536278	6.17484	6.6232e-10	1.82051e-08	85.7778	13.6429
LCN12	236.444	-2.18839	0.354437	-6.17427	6.64681e-10	1.82566e-08	146.603	945.286
TLR6	99.2127	1.38337	0.224094	6.17319	6.69259e-10	1.83689e-08	117.397	60.5
SERBP1P5	43.5716	-1.17127	0.189744	-6.17288	6.70569e-10	1.83914e-08	37.127	104.571
NUDT8	43.2894	-1.16594	0.188922	-6.17156	6.76196e-10	1.85322e-08	35.9841	108.214
KRT23	102.116	4.39435	0.712167	6.1704	6.81165e-10	1.86548e-08	92.6032	5.57143
PSG9	73.7061	4.24436	0.687977	6.16934	6.85761e-10	1.87591e-08	91.8413	6.14286
ALDH1A3	537.367	2.51714	0.408012	6.16929	6.85972e-10	1.87591e-08	764.952	173.143
CENPA	6.61072	3.21281	0.521013	6.16647	6.9831e-10	1.9041e-08	8.28571	1.14286
SKA1	8.37063	2.79004	0.452471	6.16623	6.99358e-10	1.90557e-08	9.74603	1.85714
KIF26B	1058.58	1.74178	0.282575	6.16394	7.09591e-10	1.93205e-08	1264.1	533.714
HOXB6	317.702	-1.54538	0.250754	-6.16294	7.14071e-10	1.94284e-08	254.619	1016.57
ZFHX2	265.838	-1.16351	0.188803	-6.16256	7.15797e-10	1.94518e-08	222.413	677.143
CTD-3076O17.2	9.43822	-1.77323	0.287744	-6.16252	7.15965e-10	1.94518e-08	6.90476	31.5
DLEU7	34.9299	2.28433	0.370787	6.16078	7.23882e-10	1.96384e-08	36.1429	10.5714
CLNK	75.8815	-2.46184	0.399608	-6.16066	7.24438e-10	1.96393e-08	45.9048	297.286
NME1-NME2	849.381	1.19228	0.193607	6.15824	7.35575e-10	1.99269e-08	1022.76	574.286
TTLL9	18.3195	-1.15578	0.187707	-6.15737	7.39652e-10	2.00229e-08	15.2222	45.2143
PLIN5	282.665	-2.04335	0.331882	-6.15685	7.42045e-10	2.00732e-08	190.079	1066.29
RP11-22L13.1	67.0036	-2.42498	0.394004	-6.15471	7.52148e-10	2.03318e-08	39.2381	291.643
CLIC5	606.952	-2.54985	0.414404	-6.15306	7.60043e-10	2.05305e-08	374.698	2563.5
SHANK2-AS3	27.538	-1.47056	0.239153	-6.14905	7.79507e-10	2.1026e-08	22.6032	78.7857
FAAHP1	10.0982	-2.14297	0.348513	-6.14889	7.80268e-10	2.10314e-08	6.77778	37.6429
CLDN19	299.317	-3.29935	0.536595	-6.14867	7.81359e-10	2.10457e-08	124.984	1566.86
MSANTD3-TMEFF1	45.6853	2.99456	0.48723	6.1461	7.94124e-10	2.13742e-08	58.0159	9.5
S100A11	642.068	1.27308	0.207184	6.14466	8.01343e-10	2.1553e-08	819.857	424.929
TMEM61	22.4326	-2.96968	0.483387	-6.14348	8.07354e-10	2.16991e-08	11.0159	119.5
PRF1	66.0703	1.6769	0.273024	6.14193	8.1525e-10	2.18801e-08	82.6032	34.5714
ZNF833P	20.1939	-1.50907	0.24573	-6.14118	8.19117e-10	2.19681e-08	16.2857	59.0714
RP11-337N6.1	28.7124	-2.25867	0.367815	-6.14077	8.2121e-10	2.20085e-08	14.8095	95.6429
VMP1	4442.14	1.70627	0.277952	6.13874	8.31778e-10	2.226e-08	5253.14	2281.79
ERICH4	7.76805	-2.69976	0.439787	-6.13879	8.31526e-10	2.226e-08	4.4127	35.5
AC017002.1	57.9212	2.54417	0.414477	6.13828	8.34213e-10	2.23092e-08	66.9841	17.5714
LINC01116	41.9379	-1.43058	0.233148	-6.13594	8.46592e-10	2.26081e-08	33.7143	118.429
CTC-497E21.3	4.1884	-2.0547	0.334862	-6.13596	8.46457e-10	2.26081e-08	2.87302	15.7857
FAM222A	166.992	-1.90873	0.311263	-6.13221	8.66663e-10	2.31063e-08	110.048	588.286
GFI1	43.0606	1.62477	0.264953	6.13228	8.66281e-10	2.31063e-08	51.2063	22.5
TIFAB	18.0324	2.23007	0.363826	6.1295	8.81537e-10	2.34745e-08	22.6508	6.42857
DLX4	6.01077	2.47714	0.404174	6.12889	8.84916e-10	2.35478e-08	7.66667	1.85714
PROS1	503.979	1.43748	0.234563	6.12835	8.87944e-10	2.35824e-08	603.508	283.929
SGTB	237.94	1.82885	0.298426	6.12832	8.881e-10	2.35824e-08	217.984	96.7857
TCP10L	16.969	-1.46883	0.239675	-6.12842	8.87544e-10	2.35824e-08	13.8413	50.5714
KLF15	269.761	-1.52429	0.248783	-6.12699	8.95543e-10	2.37632e-08	215.952	792
CYP4A22	98.6549	-3.19047	0.520864	-6.12534	9.04881e-10	2.3994e-08	42.3492	483
STEAP2-AS1	5.17385	-1.50812	0.246292	-6.12332	9.16446e-10	2.42836e-08	3.92063	14.7857
CTD-2619J13.27	8.11609	-1.17401	0.191791	-6.12131	9.28063e-10	2.4574e-08	6.73016	19.8571
MYOF	1248.11	1.23167	0.201239	6.12045	9.33121e-10	2.46905e-08	1550	854.857
AC005013.5	5.5927	-1.62252	0.265109	-6.12019	9.34623e-10	2.47129e-08	4.44444	18.2143
AGFG2	248.729	-1.02399	0.167357	-6.11859	9.44042e-10	2.49444e-08	220.349	633.214
GRIK3	173.555	3.46818	0.567052	6.11616	9.58589e-10	2.52931e-08	222.429	27.5
ELMO3	104.915	-1.65268	0.270302	-6.1142	9.70447e-10	2.55701e-08	81.4762	357.571
AC104777.4	8.44739	5.98989	0.979793	6.11342	9.75175e-10	2.56767e-08	9.80952	0.0714286
EPB41L4B	68.4155	-1.75327	0.286799	-6.11325	9.76214e-10	2.5686e-08	53.3968	227.929
CLEC7A	138.902	1.50765	0.246904	6.10622	1.0202e-09	2.67683e-08	162.27	74.7143
CEACAMP7	6.25195	5.79484	0.94918	6.1051	1.02739e-09	2.69381e-08	7.4127	0
IL12RB1	34.4547	1.65288	0.270859	6.10236	1.04515e-09	2.73464e-08	42.3968	18.3571
SLAMF7	103.753	2.21172	0.362573	6.10007	1.06021e-09	2.77214e-08	136.397	40.7143
ADM2	1148.37	2.03989	0.334446	6.09929	1.06539e-09	2.78372e-08	1270.71	452.571
TREH	60.6743	-1.56407	0.25646	-6.09869	1.0694e-09	2.78858e-08	46.9048	185
DOK3	176.967	1.58916	0.260565	6.0989	1.06802e-09	2.78858e-08	199.381	94.7143
RP4-734G22.3	167.048	-1.7868	0.29303	-6.09767	1.07626e-09	2.80432e-08	123.683	573.214
NCF4	66.0365	1.60703	0.263567	6.09726	1.07904e-09	2.80961e-08	80.5556	35.9286
GPR141	18.6485	1.59522	0.26164	6.09698	1.08094e-09	2.81262e-08	21.4762	9.21429
ENPP7P2	8.11752	-1.2728	0.208767	-6.09675	1.08246e-09	2.81462e-08	6.85714	21.6429
AC002451.3	8.27714	-1.67756	0.275325	-6.093	1.10815e-09	2.87943e-08	6.38095	26.2857
SIRPG	10.4632	2.68736	0.441176	6.09135	1.1196e-09	2.90716e-08	14.2222	2.71429
PRR7	37.3205	2.26233	0.371446	6.09059	1.12494e-09	2.91902e-08	40.3333	12.4286
RP11-734K21.5	6.21684	-3.11717	0.511838	-6.09014	1.12811e-09	2.9252e-08	2.95238	32.8571
HS3ST3B1	86.4501	-1.44103	0.236674	-6.08867	1.13852e-09	2.95017e-08	72.8095	257.429
CASP16	21.8271	-1.22657	0.201495	-6.08734	1.14802e-09	2.97274e-08	18.127	54.6429
ANXA1	522.777	1.80027	0.295785	6.08641	1.15472e-09	2.98596e-08	674.048	247.786
PAQR5	734.161	-1.56974	0.257909	-6.08642	1.15463e-09	2.98596e-08	541.127	2080.21
Z84812.4	10.1777	3.81566	0.627027	6.08532	1.1626e-09	3.00428e-08	13.3016	1.28571
BCAM	1947.92	-1.65305	0.271654	-6.08514	1.16392e-09	3.00561e-08	1538.44	6383.5
RP11-165F24.5	4.55836	-2.04811	0.336617	-6.08439	1.16938e-09	3.01764e-08	2.84127	15.5714
TXNL4A	429.218	1.16588	0.191648	6.08344	1.17629e-09	3.03339e-08	445.46	277.5
AC009120.4	9.00535	-1.57264	0.258694	-6.07916	1.20813e-09	3.11122e-08	24.9841	25.4286
NUSAP1	50.2774	1.66288	0.273653	6.07659	1.22762e-09	3.15926e-08	67.4127	24.5714
CYP26B1	165.218	-1.74572	0.287433	-6.07347	1.25174e-09	3.21781e-08	126.683	549.429
PCP2	11.2139	-2.30625	0.379769	-6.07276	1.25729e-09	3.22897e-08	7.15873	47.2143
FAM65C	620.909	-1.77565	0.292435	-6.07194	1.26377e-09	3.24339e-08	451.794	2196.71
MPPED2	121.233	-2.08954	0.344222	-6.07033	1.2765e-09	3.27383e-08	82.0635	461.357
GDF5	11.3758	4.0896	0.673812	6.06935	1.28428e-09	3.29154e-08	14.8571	1.21429
TFR2	61.8523	3.6031	0.593687	6.06902	1.28691e-09	3.29377e-08	134.841	8.92857
COL4A6	72.9986	-1.97887	0.326058	-6.06909	1.28638e-09	3.29377e-08	53.4286	269.643
PRR11	21.3301	1.72465	0.284242	6.06754	1.29888e-09	3.32199e-08	26.2222	10.5714
SVOPL	36.4885	-2.64057	0.435204	-6.06743	1.29971e-09	3.32199e-08	18.3333	153.857
PACRG	18.9983	-1.84167	0.303731	-6.06349	1.33199e-09	3.40219e-08	13.8254	63.6429
RASSF10	53.4993	-2.12027	0.349717	-6.0628	1.33769e-09	3.41426e-08	33.0476	195.214
HIST1H2AI	29.044	2.22563	0.367101	6.0627	1.33853e-09	3.41426e-08	38.3016	10.1429
FRMD5	40.5741	2.02178	0.333487	6.06253	1.33996e-09	3.41559e-08	48.6349	15.6429
ATP6V1B1	299.725	-3.02331	0.498735	-6.06196	1.34472e-09	3.42538e-08	150.524	1507.29
GPRIN1	50.659	1.99835	0.329661	6.06185	1.34565e-09	3.42542e-08	61.127	21
RNF152	1963.9	-1.61837	0.2671	-6.05905	1.3693e-09	3.48051e-08	1541.98	5970.36
MIR222HG	239.969	1.61576	0.266672	6.05896	1.37007e-09	3.48051e-08	266.127	121.286
GPR85	12.4894	2.36793	0.390986	6.0563	1.39289e-09	3.53609e-08	15.6508	4.07143
HNRNPA1P53	7.26627	-1.61563	0.26678	-6.05604	1.39516e-09	3.53947e-08	5.71429	21.4286
FERMT3	170.838	1.37227	0.226607	6.05571	1.398e-09	3.54427e-08	208.397	107.286
PRRG2	25.8432	-1.91674	0.316658	-6.05302	1.42158e-09	3.60162e-08	18.7302	94
LL22NC03-N14H11.1	13.6962	3.68433	0.608687	6.05291	1.42254e-09	3.60163e-08	18.127	1.78571
CRTAC1	491.734	3.37105	0.55695	6.0527	1.42438e-09	3.60384e-08	580.46	76.9286
DAPP1	51.4205	1.81552	0.299977	6.05219	1.4289e-09	3.61287e-08	63.2698	24.4286
TRABD2A	44.2796	2.20222	0.364031	6.04955	1.45249e-09	3.66756e-08	56.2381	15.4286
LINGO3	37.9686	1.97835	0.327048	6.04912	1.4564e-09	3.67496e-08	41.1905	16.1429
NPFFR1	12.2071	2.51795	0.416295	6.04848	1.46223e-09	3.68302e-08	11.9683	2.78571
RP11-519G16.3	17.9853	2.32279	0.384032	6.04844	1.46254e-09	3.68302e-08	21.9048	5.92857
IL20RA	33.9704	2.76361	0.456921	6.04833	1.46355e-09	3.6831e-08	45.8254	7.5
RP11-18M17.1	4.57833	-2.01394	0.333	-6.04787	1.4677e-09	3.69108e-08	3.1746	17.1429
CLCN4	296.298	1.40242	0.231933	6.04667	1.47871e-09	3.71628e-08	365.333	173.214
CTD-2342N23.1	27.771	-2.96528	0.490579	-6.04446	1.49908e-09	3.76496e-08	13.0635	141.357
TNNI1	53.2121	-1.93281	0.319876	-6.04238	1.51862e-09	3.80892e-08	37.6032	188.286
SHISA3	157.215	-1.76235	0.291663	-6.04241	1.51832e-09	3.80892e-08	118.048	544.5
CTC-774J1.1	8.32278	3.12696	0.517517	6.04224	1.51991e-09	3.80963e-08	11.0159	1.78571
PRAME	36.8012	3.01491	0.499102	6.04068	1.53465e-09	3.84399e-08	84.2381	7.92857
LUCAT1	68.486	2.5869	0.428504	6.03705	1.56955e-09	3.92618e-08	83.7619	17.2143
CARD14	360.513	2.76709	0.458387	6.03658	1.57416e-09	3.93508e-08	424.127	96.5
RP11-147L13.15	112.443	1.24177	0.205821	6.03327	1.60675e-09	4.01388e-08	121.143	64.9286
ALB	76.858	-3.33878	0.553428	-6.0329	1.61041e-09	4.02035e-08	33.5238	405.357
HIST3H2BB	25.7451	1.50219	0.249076	6.03105	1.62898e-09	4.06401e-08	31.2063	14.6429
EPB41	1510.24	1.1664	0.193408	6.03076	1.63191e-09	4.06862e-08	1768.86	1038.14
SCNN1B	96.3377	-3.09489	0.513279	-6.02965	1.64316e-09	4.09394e-08	50.1111	516.5
MS4A4A	71.273	1.94827	0.323173	6.02858	1.65408e-09	4.11842e-08	94.0635	30.5714
ASF1B	22.5302	1.95914	0.325031	6.02755	1.66464e-09	4.13922e-08	29.1111	9.71429
GSTO2	187.881	-1.57458	0.261254	-6.02699	1.67041e-09	4.15083e-08	147.095	565.143
SPTBN2	1145.89	-2.17465	0.360834	-6.02673	1.67313e-09	4.15484e-08	793.556	4805.29
SLC39A5	201.133	-2.65558	0.440722	-6.02552	1.68563e-09	4.1831e-08	129	914.286
RP11-523J2.1	4.3077	-2.62556	0.435913	-6.02313	1.71078e-09	4.24271e-08	2.50794	19.3571
POU2F2	165.47	1.62174	0.26927	6.02271	1.71525e-09	4.25099e-08	177.317	82.5714
CPA6	49.134	4.07977	0.677556	6.0213	1.73017e-09	4.28514e-08	69.9365	5.28571
RP11-539G18.3	15.8527	-1.30373	0.216555	-6.02034	1.7405e-09	4.30505e-08	12.873	42.5
CSF2RB	151.111	1.40042	0.232642	6.01963	1.74819e-09	4.32122e-08	185.984	94.7143
OR51M1	12.4422	-1.86726	0.310249	-6.01859	1.75938e-09	4.34317e-08	7.44444	34.2143
TMSB15B	33.3598	1.24366	0.206692	6.01697	1.77717e-09	4.38418e-08	36.5079	21.7143
LINC01135	8.59285	-1.63881	0.272399	-6.01621	1.78548e-09	4.40179e-08	6.4127	24.9286
FOSL1	33.0415	2.7064	0.449972	6.0146	1.80336e-09	4.44006e-08	41.1111	8.85714
C5orf58	19.4727	1.92582	0.320224	6.014	1.81001e-09	4.45351e-08	22.4127	8.35714
HOXD9	238.957	-1.61118	0.267962	-6.01271	1.82442e-09	4.48141e-08	181.429	757.429
LRRK2	3644.2	1.7156	0.28533	6.01267	1.82493e-09	4.48141e-08	4528.37	1846.29
SLC39A4	126.847	-1.73926	0.289357	-6.01077	1.84644e-09	4.52831e-08	103.937	429.786
SEL1L3	432.734	1.40521	0.233875	6.00836	1.87405e-09	4.58878e-08	540.048	272.5
KCNK10	19.0486	-2.43505	0.405287	-6.00821	1.87584e-09	4.58878e-08	12.127	76.9286
GGT6	164.305	-3.01717	0.502165	-6.00832	1.87458e-09	4.58878e-08	85.6349	860.071
CTSLP1	4.14415	-2.48507	0.413613	-6.0082	1.87599e-09	4.58878e-08	2.69841	19.7143
MAP1LC3C	5.79316	3.12518	0.520179	6.00789	1.87956e-09	4.59452e-08	7.68254	1.07143
ACPP	109.469	-2.4739	0.411804	-6.00747	1.88439e-09	4.60035e-08	69.1111	468.286
RP3-323N1.2	16.1031	2.4576	0.409086	6.00755	1.8835e-09	4.60035e-08	19.1429	4.57143
NFATC2	415.93	1.27423	0.21221	6.00457	1.91843e-09	4.67736e-08	488.492	276.643
HMGB3	137.814	1.29267	0.215286	6.00445	1.91986e-09	4.6778e-08	173.127	86.4286
SLC25A42	376.338	-1.24453	0.207327	-6.00275	1.94009e-09	4.72403e-08	333.159	976.643
RP11-133K1.9	9.15575	-1.91868	0.319671	-6.00205	1.9484e-09	4.73812e-08	6.28571	31.7143
FUCA2	434.449	1.0576	0.176217	6.0017	1.95267e-09	4.74544e-08	510.254	310.571
CTD-2132N18.2	75.7056	-1.30378	0.21732	-5.99936	1.98103e-09	4.80812e-08	60.4762	211.357
GPR65	69.024	1.48216	0.247105	5.99811	1.99626e-09	4.83884e-08	85.2698	40.4286
UGCG	1053.21	1.33016	0.221888	5.99476	2.03788e-09	4.93334e-08	1055.03	607.786
FAM186A	43.7753	-1.18764	0.198152	-5.99358	2.0527e-09	4.96602e-08	34.8413	104.571
RP11-116D17.4	45.9023	4.93846	0.824196	5.99185	2.07469e-09	5.01276e-08	57.4762	2.5
LILRA1	21.5641	1.28017	0.21376	5.98883	2.11362e-09	5.10353e-08	24.9206	13.4286
RP11-352D13.5	12.5143	-2.42799	0.405484	-5.98788	2.12592e-09	5.12993e-08	6.87302	49.3571
DOK1	128.843	1.25601	0.209807	5.98647	2.14444e-09	5.16798e-08	128.413	79.3571
RP11-89H19.2	10.3253	-1.46395	0.244574	-5.98569	2.15473e-09	5.18947e-08	8.74603	33.1429
HS6ST2	125.95	-2.28572	0.381893	-5.98523	2.16091e-09	5.201e-08	85.9683	533.929
KCNAB2	1797.94	2.00293	0.334652	5.98511	2.16237e-09	5.20119e-08	2271.11	719.929
CECR5-AS1	5.35283	-1.52025	0.25403	-5.98452	2.1703e-09	5.21691e-08	4.1746	16.0714
KCNK5	369.39	-1.65968	0.277351	-5.98405	2.1766e-09	5.22871e-08	299.524	1246.21
CKLF	40.9289	1.29982	0.217276	5.98237	2.19908e-09	5.27596e-08	52.4444	26.0714
AC011899.9	14.2782	2.28661	0.382233	5.98226	2.20069e-09	5.27646e-08	17.2698	5.21429
TXNRD1	957.547	1.53061	0.256032	5.9782	2.25623e-09	5.39584e-08	1246.24	539.929
NYNRIN	467.925	-1.29197	0.216146	-5.97728	2.26893e-09	5.42277e-08	405.54	1317.93
NUPR1	678.204	2.07169	0.346775	5.97415	2.31294e-09	5.52442e-08	654.27	239.5
CTHRC1	52.9758	1.93502	0.323978	5.97267	2.33396e-09	5.56756e-08	70.127	21.8571
PRDM1	225.89	1.51554	0.253788	5.97168	2.34822e-09	5.59801e-08	263.079	122.571
MFSD1	625.725	1.19424	0.200042	5.96992	2.37369e-09	5.65155e-08	736.143	420.643
NEB	265.959	-1.26936	0.212704	-5.96774	2.40565e-09	5.72401e-08	223.333	705.571
CD3G	27.5601	1.95739	0.32802	5.96729	2.41227e-09	5.73612e-08	35.2857	10.3571
RP11-396B14.2	5.2324	-2.04022	0.341942	-5.96657	2.42289e-09	5.75773e-08	3.31746	18.3571
NME1	135.728	1.42343	0.23859	5.966	2.43139e-09	5.77429e-08	165.111	76.1429
E2F2	15.3753	2.04498	0.342793	5.96565	2.43667e-09	5.78317e-08	19.4127	6.42857
HRH1	82.3559	1.35748	0.227662	5.96267	2.48142e-09	5.87082e-08	101.492	51.8571
RP11-1260E13.3	18.8582	-1.42748	0.239441	-5.96172	2.49591e-09	5.90139e-08	15.3333	57.5714
CYS1	1309.1	-1.82789	0.306622	-5.96137	2.50133e-09	5.91047e-08	879.73	4295.36
MAST1	58.7482	3.59025	0.602273	5.96116	2.50456e-09	5.91066e-08	64.1905	8.85714
C15orf56	13.0657	-1.87844	0.315111	-5.9612	2.50396e-09	5.91066e-08	9.84127	46.7143
KCNH3	41.8641	-1.86471	0.312874	-5.95995	2.52317e-09	5.9471e-08	29.873	145.714
FMO6P	35.7183	2.56744	0.430838	5.95917	2.53525e-09	5.96809e-08	32	7.71429
C1orf64	5.28253	-2.96974	0.498421	-5.95829	2.54892e-09	5.9965e-08	2.5873	25.8571
NAGLU	1033.97	1.35234	0.226988	5.95776	2.55714e-09	6.01209e-08	1219.16	619.857
TRPM6	111.04	-2.67454	0.449236	-5.95354	2.62396e-09	6.15762e-08	60.3651	489.786
TMEM217	31.6667	1.69897	0.28537	5.95358	2.62344e-09	6.15762e-08	33.0317	14
HTATIP2	153.275	1.37971	0.231759	5.95323	2.629e-09	6.16559e-08	176.508	89.1429
ADORA3	7.51894	2.97167	0.499313	5.95151	2.65686e-09	6.22705e-08	9.31746	1.64286
PLCB2	400.409	1.52835	0.256818	5.95111	2.66331e-09	6.23825e-08	432.048	220.714
RP1-234P15.4	12.1426	-1.28349	0.215693	-5.95053	2.67276e-09	6.25649e-08	8.04762	26.0714
UMODL1	4.39261	-2.46379	0.41426	-5.94745	2.72345e-09	6.36721e-08	4.30159	18.9286
RP1-102K2.8	57.2364	2.70608	0.455064	5.94658	2.73809e-09	6.39348e-08	55.5079	13.7857
RP3-412A9.16	54.6384	-1.31277	0.220759	-5.94661	2.73753e-09	6.39348e-08	45.4444	147.643
ANTXRLP1	5.98865	2.91409	0.490175	5.945	2.76459e-09	6.44732e-08	7.19048	1.28571
GLA	104.908	1.51556	0.255086	5.94139	2.82614e-09	6.5827e-08	130.952	57
OSBPL3	539.598	-1.12064	0.188674	-5.93959	2.85734e-09	6.65123e-08	468.54	1327.93
ENPP7P8	10.1565	-1.8642	0.313868	-5.93944	2.85999e-09	6.6533e-08	7.69841	34.7143
NHP2P1	14.4213	-1.23494	0.20794	-5.93892	2.86913e-09	6.66629e-08	11.5873	36.2143
JUP	1764.62	-1.0609	0.17864	-5.93879	2.87135e-09	6.66732e-08	1636.29	4380.71
NYAP1	22.3631	-2.34164	0.394364	-5.93776	2.8894e-09	6.70095e-08	13.5714	103.071
CDC45	7.03384	2.58747	0.435804	5.93724	2.89855e-09	6.71801e-08	9.44444	2.14286
GADL1	13.524	-2.61892	0.441165	-5.93637	2.91407e-09	6.74983e-08	7.92063	62.4286
LUZP2	99.4885	4.80055	0.808826	5.93521	2.93475e-09	6.78933e-08	144.619	4.64286
SPHK2	446.674	-1.15919	0.195378	-5.93305	2.97356e-09	6.87489e-08	366.984	1067.71
RP11-867G23.8	34.3729	-1.27502	0.214937	-5.93204	2.99192e-09	6.91309e-08	24.746	78.9286
P2RX7	129.774	1.49858	0.252646	5.93154	3.00108e-09	6.92998e-08	149.825	73
PRELID1P4	6.77974	-1.5092	0.254575	-5.92831	3.06073e-09	7.06337e-08	5.31746	21.0714
HSPB7	355.452	-2.03733	0.343791	-5.92607	3.10266e-09	7.15135e-08	234.651	1262.43
PRKAG2	2756.74	2.11035	0.356124	5.92589	3.10609e-09	7.15486e-08	3356.73	1037.93
RP11-77K12.9	22.6907	-1.12836	0.190539	-5.92194	3.18156e-09	7.31525e-08	18.9206	52.4286
RP11-776H12.1	29.9357	3.5904	0.606307	5.92176	3.1851e-09	7.3189e-08	38.3175	4.42857
SAMHD1	821.263	1.07079	0.180831	5.92149	3.19037e-09	7.32653e-08	983.508	607.071
RNF157	385.308	1.49501	0.252506	5.9207	3.20572e-09	7.35728e-08	477.095	213.214
SH2D4A	107.518	-1.06022	0.179088	-5.9201	3.21746e-09	7.37972e-08	102.238	267.643
AC012123.1	7.49966	-2.08866	0.352849	-5.91943	3.23062e-09	7.40539e-08	4.85714	27.0714
MTURN	1198.69	-1.36725	0.230988	-5.91914	3.23629e-09	7.40932e-08	1033.94	3401.57
NRG3-AS1	11.037	2.55778	0.432114	5.91922	3.23462e-09	7.40932e-08	11.9048	2.85714
BCL2A1	12.6449	2.43392	0.411394	5.91627	3.29331e-09	7.53528e-08	15.7778	3.57143
RP11-752D24.2	44.1693	-1.1677	0.197375	-5.91613	3.296e-09	7.53684e-08	37.4127	106.429
SERPINA5	370.741	-3.23808	0.547535	-5.91394	3.34029e-09	7.62418e-08	180.762	2024.86
FOLH1B	8.50039	-2.48925	0.420926	-5.91374	3.3443e-09	7.62871e-08	5.20635	36.9286
TPO	12.13	2.79546	0.472789	5.91269	3.3656e-09	7.67263e-08	23.1111	2.78571
DRD5	8.7578	-1.94665	0.329307	-5.91136	3.39303e-09	7.73046e-08	5.87302	28.8571
PTP4A1	585.147	1.29165	0.218555	5.90998	3.4215e-09	7.7906e-08	698.984	362.929
CTD-2515H24.1	11.4148	-2.8209	0.477358	-5.9094	3.43365e-09	7.81354e-08	6	52.9286
LRRC15	67.2388	4.07164	0.689312	5.90682	3.48771e-09	7.92695e-08	99.1905	6.42857
RHBDL2	55.7973	1.64781	0.278984	5.90645	3.49557e-09	7.93999e-08	55.2063	24.7857
PHF21B	45.5204	-2.36754	0.400851	-5.90629	3.499e-09	7.94297e-08	28.3333	195.214
TYR	92.7675	4.61623	0.781625	5.90594	3.50645e-09	7.95508e-08	108.698	5.71429
NUPR1L	9.35213	-2.72225	0.461098	-5.90384	3.5514e-09	8.05221e-08	4.63492	41.2143
TRG-AS1	33.528	1.71572	0.290638	5.90329	3.56321e-09	8.07409e-08	39.7937	17.2857
CYP27B1	80.698	-2.20921	0.374382	-5.90096	3.61384e-09	8.1839e-08	58.3651	308.857
SPOCD1	30.5941	3.06381	0.519405	5.89869	3.66394e-09	8.29234e-08	38.5238	6.78571
DPP6	429.786	2.24087	0.379954	5.89773	3.68533e-09	8.33574e-08	509.571	141.357
P2RY10	33.2429	2.15566	0.36556	5.89686	3.70478e-09	8.36459e-08	44.5079	13.5
SLC17A2	29.935	3.20724	0.54388	5.89695	3.70271e-09	8.36459e-08	32.9841	4.64286
KREMEN1	318.709	-1.04661	0.177493	-5.89663	3.70998e-09	8.37132e-08	286.587	783.5
MCTP2	330.903	1.273	0.215898	5.89632	3.71708e-09	8.38229e-08	360.889	197.429
MCM10	8.54724	2.63392	0.446769	5.89547	3.73611e-09	8.42014e-08	11.5714	2.35714
RP5-1097F14.3	4.17654	5.00492	0.849027	5.89489	3.74934e-09	8.44491e-08	4.4127	0
CENPK	16.024	1.84464	0.313137	5.89083	3.84252e-09	8.63923e-08	19.7619	7
AC079630.2	201.902	2.77078	0.470525	5.88871	3.89227e-09	8.73538e-08	252.333	53.9286
KB-208E9.1	14.7701	-1.74554	0.296418	-5.88878	3.89059e-09	8.73538e-08	11.2698	47.5
STX11	65.762	1.50664	0.255993	5.88547	3.96916e-09	8.90264e-08	77.6984	35.5714
CEACAMP6	8.44066	5.60962	0.953318	5.88431	3.99721e-09	8.94951e-08	10.1111	0.214286
SERPINA7	4.68144	4.56997	0.776668	5.88407	4.00304e-09	8.95722e-08	6.57143	0.285714
SERPINA4	17.7057	-2.81014	0.477596	-5.88393	4.00633e-09	8.95923e-08	10.2063	89.5714
MILR1	14.0484	1.85554	0.315372	5.88365	4.01304e-09	8.9689e-08	15.9524	6.21429
RP11-120K18.2	9.50847	4.43611	0.754019	5.88329	4.02198e-09	8.98354e-08	26.5714	0.642857
PYCARD	85.805	2.18583	0.371609	5.88206	4.05195e-09	9.04509e-08	111.397	29.1429
TRIM6	200.333	-1.52004	0.258434	-5.88173	4.05991e-09	9.05748e-08	168.175	570.286
XXyac-YM21GA2.7	42.2789	-3.00276	0.510951	-5.8768	4.18278e-09	9.32605e-08	20.1429	184.143
NOS1AP	153.285	-1.59442	0.271387	-5.87506	4.22697e-09	9.41898e-08	118.73	466.143
CD300C	20.0232	1.50173	0.255667	5.87377	4.25997e-09	9.48689e-08	23.3492	10.7857
RASL11B	57.2032	-1.78391	0.303719	-5.87354	4.26581e-09	9.48865e-08	45.3492	201.357
RHBG	154.057	-2.7505	0.468285	-5.87355	4.2655e-09	9.48865e-08	85.619	747.286
PDCD4-AS1	43.3913	2.00416	0.341374	5.87085	4.33557e-09	9.63811e-08	43.9683	16.1429
INSRR	65.003	-2.77716	0.473162	-5.86936	4.37485e-09	9.71392e-08	35.0476	311.286
C2orf71	11.5659	-2.50576	0.427007	-5.86818	4.40595e-09	9.7772e-08	6.65079	46.4286
TCL6	117.77	-2.87424	0.489921	-5.86675	4.44426e-09	9.85056e-08	60.9048	514.571
RAPGEF3	1300.97	-1.59274	0.271519	-5.86603	4.46348e-09	9.8815e-08	997.46	4084.43
ITIH5	314.513	-1.70099	0.28999	-5.86568	4.47291e-09	9.89655e-08	256.905	1071.36
CLDN16	187.028	-3.0479	0.519698	-5.86475	4.49801e-09	9.94063e-08	92.1429	951.286
DNAJB1P1	29.9905	2.5003	0.426327	5.86475	4.49813e-09	9.94063e-08	34.254	8.78571
LXN	86.6805	1.44835	0.24699	5.864	4.51843e-09	9.97961e-08	107.905	49.8571
AP001187.9	66.3557	-2.44046	0.416199	-5.86369	4.52684e-09	9.99231e-08	43.3016	252.357
AC104389.28	6.24472	-1.73645	0.296238	-5.86167	4.58246e-09	1.00935e-07	4.65079	19.8571
CD274	165.395	2.08065	0.355022	5.86063	4.61111e-09	1.01485e-07	177.873	53.2857
RHCG	212.965	-2.42257	0.413387	-5.86029	4.62069e-09	1.01636e-07	216.635	929.929
SLC34A3	64.7656	-2.20116	0.375618	-5.8601	4.62602e-09	1.01694e-07	44.4603	249.643
ATAD2	108.078	1.26036	0.215095	5.85958	4.64038e-09	1.0195e-07	133.492	72.5714
RP11-5P18.10	6.70897	-2.86896	0.489637	-5.85936	4.64646e-09	1.02024e-07	3.4127	32.1429
TMEM105	7.46884	-3.26724	0.557663	-5.8588	4.6622e-09	1.0231e-07	3.22222	42.5
NEK2	7.69936	3.82806	0.653502	5.85776	4.69153e-09	1.02879e-07	10.0635	0.857143
CEBPB	761.974	1.81529	0.309899	5.85769	4.69363e-09	1.02879e-07	820.397	363.643
RP11-469H8.6	20.492	-3.5175	0.600524	-5.85739	4.70198e-09	1.03002e-07	7.93651	121.929
TRPM8	4.39779	4.29834	0.733855	5.8572	4.70731e-09	1.03058e-07	5.47619	0.357143
SOAT1	674.419	1.11862	0.191031	5.8557	4.74997e-09	1.03932e-07	830.444	470.214
STS	332.147	1.25036	0.213572	5.8545	4.78445e-09	1.04625e-07	408.587	222.214
TGFBI	989.575	1.55786	0.266107	5.85427	4.79111e-09	1.0471e-07	1270.87	585.857
CHSY3	79.8564	2.26819	0.387575	5.85227	4.84913e-09	1.05916e-07	95.6984	29.5
ARHGEF19	42.433	-1.27902	0.218592	-5.85118	4.88085e-09	1.06547e-07	35.6825	116.429
BATF	11.7835	2.89685	0.495128	5.8507	4.89501e-09	1.06794e-07	15.0952	3
RASGRF1	131.494	3.04874	0.521155	5.84998	4.91641e-09	1.07199e-07	172.048	25
HK3	58.8503	2.01629	0.344706	5.84931	4.93605e-09	1.07565e-07	69.5873	23.8571
RP11-217B7.2	21.293	2.08096	0.355903	5.847	5.0052e-09	1.09008e-07	21.1905	8.07143
CKAP2L	24.3367	2.83633	0.485323	5.8442	5.09012e-09	1.10675e-07	30.9048	5.42857
MCF2L2	176.724	2.1226	0.363243	5.84347	5.11254e-09	1.11088e-07	208.111	68.7143
AC009336.19	214.813	-1.75892	0.301015	-5.84329	5.11794e-09	1.11129e-07	160.635	721.214
NCF1B	30.4105	1.56427	0.267714	5.84306	5.125e-09	1.11166e-07	36.6032	16.6429
CD200R1	24.7053	1.74416	0.298544	5.84222	5.15096e-09	1.116e-07	32.0635	11.7143
PLA2R1	996.333	-1.24778	0.213637	-5.84065	5.1999e-09	1.12596e-07	841.746	2524.86
CENPU	26.8624	1.38273	0.23676	5.84023	5.21303e-09	1.12815e-07	32.7143	16.2857
LINC00654	120.938	1.13603	0.19458	5.8384	5.27036e-09	1.13924e-07	143.714	86.7857
SERPINA3	64.2817	2.82493	0.483881	5.83808	5.28069e-09	1.14082e-07	87.2698	17
GNLY	32.2663	1.71214	0.293299	5.83751	5.29876e-09	1.14406e-07	38.381	15.7143
RP11-386B13.4	16.4301	-3.47604	0.595634	-5.83587	5.35105e-09	1.15469e-07	6.7619	97
SNX8	706.483	1.49108	0.255508	5.83574	5.35512e-09	1.1549e-07	823.603	378.286
SLC4A1	363.255	-3.36028	0.57585	-5.83533	5.36828e-09	1.15708e-07	161.571	2022.93
RP11-685B24.1	23.6441	2.20759	0.378387	5.83421	5.40445e-09	1.16354e-07	25.0635	7.5
GAPDH	8120.56	1.39773	0.239606	5.83347	5.42873e-09	1.1681e-07	9874.44	4901.93
SH3KBP1	432.628	1.09635	0.188004	5.83149	5.49335e-09	1.18065e-07	487.286	284.357
RP11-253M7.6	19.1806	-1.6546	0.283773	-5.83073	5.51841e-09	1.18468e-07	13.619	56.0714
CDC20	19.2433	2.34264	0.401958	5.82807	5.60716e-09	1.20235e-07	27.2222	6.57143
ELSPBP1	63.3058	5.95199	1.02146	5.82692	5.646e-09	1.20999e-07	25.7619	0.571429
CRIP3	24.6882	-1.73145	0.297152	-5.82681	5.64983e-09	1.21012e-07	18.3333	77.7143
GCKR	13.6911	4.25598	0.730529	5.82589	5.68106e-09	1.21612e-07	22.4286	1.21429
SCNN1A	970.953	-2.57445	0.441928	-5.82551	5.69385e-09	1.21816e-07	568.524	4448.79
TMC8	343.651	1.63798	0.281182	5.82531	5.70056e-09	1.2189e-07	399.159	185.857
EIF5A2	85.5788	1.42052	0.24389	5.82442	5.73096e-09	1.2247e-07	104.921	50.7857
KLHL34	12.3434	3.37059	0.578852	5.82288	5.78429e-09	1.2354e-07	16.2857	2
NIPAL1	45.9815	-1.50242	0.258033	-5.8226	5.79375e-09	1.23671e-07	37.8413	139.929
SLC5A1	30.5997	-2.76804	0.475408	-5.82245	5.79903e-09	1.23714e-07	16.6349	137.786
DUSP4	165.477	2.46151	0.422834	5.82145	5.83381e-09	1.24385e-07	197.492	50.8571
CR2	48.1821	3.29196	0.565645	5.81983	5.89064e-09	1.25525e-07	69.254	8.92857
FCGR1B	14.0788	1.91624	0.329304	5.81908	5.91737e-09	1.26024e-07	16.3492	5.64286
GABRQ	88.3461	4.51912	0.77676	5.81792	5.95853e-09	1.26828e-07	134.984	5.71429
HIST1H2BK	108.632	1.24978	0.21485	5.81699	5.99185e-09	1.27465e-07	139	71.2857
RELB	208.065	1.24791	0.214599	5.81507	6.06083e-09	1.2886e-07	242.302	139.429
FETUB	4.46421	-3.46137	0.595323	-5.81427	6.08984e-09	1.2933e-07	1.68254	27.5
DIO1	94.2869	-2.19019	0.376767	-5.81311	6.13215e-09	1.30155e-07	65.8571	366.214
ARPC5	534.703	1.03876	0.178697	5.81299	6.13684e-09	1.30181e-07	656.333	389.214
CD7	39.811	1.96549	0.338138	5.81268	6.14819e-09	1.30348e-07	46.6984	16
FLJ37035	16.1679	-1.27707	0.219776	-5.8108	6.21745e-09	1.31668e-07	14.2222	44.7143
PERM1	299.264	3.37218	0.580445	5.80965	6.26024e-09	1.3235e-07	418.27	54.0714
THBS1	10186.6	1.52222	0.262109	5.8076	6.33741e-09	1.33906e-07	13257.1	6052.79
FAT1	9205.93	1.04905	0.180684	5.80597	6.39951e-09	1.35142e-07	11269.7	6850.79
PNPLA1	17.7126	-2.62714	0.452588	-5.80471	6.4479e-09	1.36087e-07	11	79.2857
CD3D	14.959	2.36223	0.40698	5.80428	6.46423e-09	1.36279e-07	20.5238	5.28571
LINC00426	30.1217	2.23414	0.385099	5.80147	6.57343e-09	1.38503e-07	37.9365	11.1429
EPDR1	531.396	1.39136	0.239842	5.80116	6.58582e-09	1.38686e-07	587.429	291.929
NELL1	53.858	-3.19582	0.551234	-5.79757	6.72812e-09	1.41366e-07	26.4762	293
AC005625.1	18.0302	4.59158	0.792042	5.79714	6.74551e-09	1.41652e-07	25.6984	1.21429
RP4-647J21.1	12.4899	1.61959	0.279464	5.79535	6.81804e-09	1.43095e-07	14.8571	6.64286
TNFAIP3	489.116	1.51724	0.26189	5.79341	6.89703e-09	1.44672e-07	593.619	276.143
KCND2	29.4328	3.16263	0.545954	5.79284	6.92056e-09	1.45085e-07	38.3492	6.21429
SLC26A4	63.5991	-2.76254	0.477032	-5.79111	6.99247e-09	1.4651e-07	32.7619	283.5
PRDX4	145.654	1.38766	0.239651	5.79035	7.02418e-09	1.47011e-07	186.921	87.6429
RBM20	490.772	1.48008	0.255609	5.79042	7.0209e-09	1.47011e-07	504.397	239.643
B3GNT5	225.583	1.19966	0.207192	5.7901	7.0346e-09	1.47147e-07	259.778	154.286
MST1P2	137.882	-1.95234	0.33725	-5.789	7.08066e-09	1.48028e-07	99.5873	518.071
SLC26A6	326.535	-1.18898	0.205393	-5.78881	7.08852e-09	1.48109e-07	286.921	850.071
GATSL3	59.9981	-1.15416	0.199404	-5.78806	7.12019e-09	1.48688e-07	52.3175	153.714
LINC01561	9.30103	-2.20171	0.380464	-5.78692	7.16907e-09	1.49626e-07	5.85714	33.0714
COL6A4P2	20.2887	-2.27536	0.393258	-5.78594	7.211e-09	1.50418e-07	13.0635	72.4286
RP1-72A23.4	4.39866	-1.94794	0.336677	-5.78579	7.21718e-09	1.50463e-07	3.34921	15.5714
HOXB13	47.6995	4.50747	0.779199	5.78475	7.26209e-09	1.51231e-07	39.4286	2.57143
LIMK1	429.524	1.16528	0.201452	5.78442	7.27627e-09	1.51442e-07	479.651	296.714
LIPC	247.794	2.29034	0.395962	5.78425	7.28378e-09	1.51515e-07	350.921	87.5
RP11-151F5.2	8.90315	2.15862	0.373234	5.78357	7.3133e-09	1.52045e-07	10.1587	3.07143
RP13-870H17.3	32.0484	-2.12722	0.367847	-5.78289	7.34294e-09	1.52506e-07	20.9365	120.429
RARRES1	61.1696	1.59606	0.276009	5.78263	7.35402e-09	1.52638e-07	76.254	35.0714
SNAP91	8.30399	3.92495	0.679143	5.77927	7.50266e-09	1.55637e-07	11.0635	1
RP4-613B23.5	156.335	3.52186	0.609492	5.77836	7.54313e-09	1.5639e-07	162	18.2143
ESPNP	71.5221	-2.60668	0.451262	-5.77641	7.63113e-09	1.58127e-07	37.6349	323.071
IL17RE	87.2656	-1.70421	0.295041	-5.77617	7.64191e-09	1.58263e-07	58.7302	257.429
BRSK2	82.0651	-1.357	0.234934	-5.77608	7.64625e-09	1.58266e-07	65.5714	218.5
FER1L6	24.6105	-2.782	0.481759	-5.77466	7.71071e-09	1.59424e-07	15.0476	116.929
RP11-120K18.3	32.8237	4.02118	0.696344	5.7747	7.70886e-09	1.59424e-07	36.5397	3
KCNA2	93.9196	2.83124	0.490392	5.77341	7.76829e-09	1.60526e-07	120.841	23.1429
GYG2	106.495	2.07257	0.359016	5.77291	7.79151e-09	1.60917e-07	129	39.9286
PLA2G4F	165.831	-2.67688	0.463788	-5.77177	7.84437e-09	1.61831e-07	96.9206	794.286
SOWAHA	84.1369	-2.05651	0.35637	-5.77072	7.8935e-09	1.62755e-07	55.5714	322.571
GPR98	143.503	-2.67428	0.46348	-5.77	7.92727e-09	1.63362e-07	79.6349	679.714
GATA3	309.755	-2.21935	0.384743	-5.76841	8.00227e-09	1.64817e-07	212.27	1277.14
LINC00599	4.58173	-2.27757	0.394857	-5.76809	8.01746e-09	1.65039e-07	2.88889	16.5
RP11-133K1.8	11.7262	-2.64179	0.458414	-5.7629	8.26817e-09	1.70107e-07	6.66667	55.3571
PITPNM3	144.682	-1.39295	0.241754	-5.76186	8.31927e-09	1.71065e-07	113.349	395.929
RP11-1084J3.1	27.8621	3.1627	0.548957	5.76129	8.34715e-09	1.71544e-07	36.6825	4.78571
FGF14	163.43	2.61161	0.453384	5.76025	8.39906e-09	1.72422e-07	185.492	46.6429
TMEM52B	591.505	-3.29634	0.572329	-5.75952	8.43558e-09	1.73077e-07	260.905	3097.71
AC103563.9	12.6596	-2.61975	0.455157	-5.75569	8.62883e-09	1.76945e-07	6.7619	59.5714
ACY3	93.7223	-2.08112	0.361591	-5.75544	8.6414e-09	1.77106e-07	69.3968	355.357
MAPK8IP1	188.863	-1.18226	0.205496	-5.75319	8.75735e-09	1.79189e-07	154.429	491
C9orf43	11.4228	-1.13219	0.1968	-5.75301	8.7667e-09	1.79283e-07	9.8254	27.2857
SLC4A9	277.18	-3.17618	0.552167	-5.7522	8.80885e-09	1.80047e-07	131.635	1500.21
ZNF763	63.6417	-1.04191	0.181182	-5.75063	8.89129e-09	1.81633e-07	54.254	145.5
CTD-2020K17.1	86.9926	1.95695	0.340385	5.74925	8.96424e-09	1.83024e-07	88	35.5
CTD-2015H6.3	9.21602	-1.37018	0.238379	-5.74789	9.03636e-09	1.84396e-07	7.57143	26.0714
PTH1R	786.392	-2.48075	0.431667	-5.7469	9.0896e-09	1.85381e-07	478.492	3393.29
PAK6	77.3421	-1.87646	0.326597	-5.7455	9.16473e-09	1.86812e-07	56.9683	285.714
FRMD7	15.1279	-2.76372	0.481098	-5.7446	9.21394e-09	1.87713e-07	7.77778	71.5714
GZMK	23.9497	2.77626	0.483434	5.74278	9.31346e-09	1.89638e-07	32.8571	6.07143
RP11-250B2.4	6.47028	-1.274	0.221885	-5.74172	9.37172e-09	1.90618e-07	5.2381	17.1429
SHMT2	425.151	1.13624	0.197914	5.74106	9.40839e-09	1.9126e-07	520.921	298.929
FABP7P2	11.5031	2.20478	0.384094	5.74021	9.45588e-09	1.92121e-07	13.2222	3.92857
GPR55	8.0193	2.30546	0.401823	5.7375	9.60823e-09	1.95006e-07	9.1746	2.42857
KRTAP5-8	9.28712	-2.10025	0.366149	-5.73606	9.69024e-09	1.96564e-07	6.47619	33.6429
ANK1	130.49	2.68166	0.467635	5.73451	9.77947e-09	1.98267e-07	177.984	34.3571
INPP5D	438.444	1.13791	0.198445	5.73413	9.80116e-09	1.98492e-07	509.81	315.071
C6orf1	151.649	1.03745	0.180925	5.73414	9.80078e-09	1.98492e-07	166.397	110.929
CALU	1036.27	1.30021	0.226854	5.73149	9.955e-09	2.0139e-07	1244.51	631.357
MST1L	861.696	-2.26843	0.396017	-5.72812	1.01553e-08	2.05331e-07	550.825	3478.86
OLIG2	12.5578	-2.96473	0.51766	-5.72717	1.02122e-08	2.06371e-07	6.36508	64.7857
WDR88	10.9971	-1.09003	0.190379	-5.7256	1.03067e-08	2.08056e-07	9.25397	26.7143
AC084290.2	10.9882	2.68335	0.468691	5.7252	1.03311e-08	2.08437e-07	12.2857	2.64286
AC068491.3	20.5476	2.19826	0.383969	5.72511	1.03367e-08	2.08439e-07	24.0159	7.64286
SLCO2B1	1303.65	1.16164	0.20297	5.7232	1.04534e-08	2.10454e-07	1579.84	898.071
SLC16A13	67.5015	-1.42348	0.248716	-5.72331	1.0447e-08	2.10454e-07	55.5238	199.214
EIF5AP3	19.0729	1.44162	0.25192	5.72252	1.04953e-08	2.11069e-07	20.5873	9.64286
FANCI	76.5681	1.23122	0.215284	5.71907	1.07106e-08	2.15285e-07	90.5873	50.0714
DOK2	61.1275	1.62424	0.284023	5.7187	1.0734e-08	2.1564e-07	75.0159	33.2857
AURKA	35.1269	1.54233	0.269707	5.71856	1.07429e-08	2.15702e-07	41.5873	18.8571
DPEP1	291.985	-2.89574	0.506383	-5.71847	1.07491e-08	2.15711e-07	165.095	1409.79
AC087762.1	57.9107	-2.75916	0.482549	-5.71788	1.07861e-08	2.16338e-07	30.9048	239.357
TPSP2	15.4719	6.33339	1.10804	5.71586	1.09152e-08	2.18695e-07	17	0.285714
RP11-33E12.2	36.9551	-1.13513	0.198774	-5.71066	1.12538e-08	2.25238e-07	32.6825	91.5
ABCA2	1296.5	-1.12321	0.196706	-5.71009	1.12916e-08	2.25874e-07	1153.63	3397.43
SYT10	12.5373	-2.44804	0.428769	-5.70947	1.13331e-08	2.26485e-07	7.80952	55.5
MFSD5	221.178	1.1377	0.199267	5.70945	1.13342e-08	2.26485e-07	270.81	155.286
RAB11FIP4	418.425	-1.08295	0.189691	-5.70905	1.13606e-08	2.26891e-07	383.46	1059.5
P4HA3	70.1414	2.90041	0.508167	5.70759	1.14589e-08	2.28733e-07	91.6825	16.2857
ELOVL5	565.518	1.3369	0.234301	5.70593	1.15708e-08	2.30721e-07	697.222	340.5
ARHGAP40	235.57	3.36972	0.590655	5.70506	1.16305e-08	2.31667e-07	253.048	41.8571
SPC24	20.1077	1.97562	0.346319	5.70462	1.16606e-08	2.32143e-07	23.3492	7.5
CLECL1	7.62321	2.099	0.367972	5.70423	1.16869e-08	2.32543e-07	9.39683	2.71429
SRGAP3-AS3	8.57664	-1.45206	0.254566	-5.70406	1.1699e-08	2.3266e-07	7.01587	25.5714
EPHA6	70.6389	3.54146	0.620918	5.7036	1.17306e-08	2.33165e-07	60.8571	10.5714
KCNK12	58.7498	-1.19099	0.208854	-5.7025	1.18064e-08	2.34423e-07	48.9524	152.357
C7orf57	17.6915	3.54032	0.620905	5.70188	1.18495e-08	2.35156e-07	18.9206	2.21429
CASP3	203.982	1.36546	0.239536	5.70044	1.19501e-08	2.36901e-07	243.524	125.214
TFPI2	264.122	2.48719	0.436341	5.70011	1.19731e-08	2.37231e-07	314.349	80.0714
RP11-218E20.3	33.3952	-2.01881	0.35418	-5.69995	1.19843e-08	2.37328e-07	21.6349	121.286
RP11-297D21.2	16.3911	-2.63007	0.461655	-5.69705	1.21901e-08	2.41276e-07	7.28571	64.5
ZNF831	100.446	1.74764	0.306801	5.69632	1.22422e-08	2.42179e-07	121.175	50.5714
LINC01310	35.2624	7.27082	1.27671	5.69498	1.2339e-08	2.43966e-07	45.8413	0.357143
SCRN2	328.042	-1.14772	0.201544	-5.69464	1.23631e-08	2.44269e-07	304.54	842.929
NCF1C	19.7522	1.71719	0.301548	5.69458	1.23673e-08	2.44269e-07	22.9841	8.85714
CBLC	21.9894	-2.4042	0.422242	-5.69389	1.24176e-08	2.45005e-07	14.1746	97.7143
ANO7P1	4.44337	-2.04268	0.358897	-5.69154	1.25899e-08	2.48274e-07	3.01587	16
RP11-556N21.1	18.4424	4.84857	0.851997	5.69083	1.26422e-08	2.49175e-07	26.5714	1.14286
CD74	8349.35	1.16753	0.205197	5.68982	1.27176e-08	2.50528e-07	10355.2	5734.64
FABP5P7	7.78391	3.71637	0.653298	5.68862	1.28071e-08	2.5216e-07	10.2698	0.928571
TUBB2A	575.159	1.71857	0.302184	5.68718	1.29154e-08	2.54026e-07	694.016	274.929
SGK2	560.692	-1.6925	0.297675	-5.68572	1.3026e-08	2.56066e-07	432.317	1786.86
CLEC2L	10.4967	4.12942	0.726442	5.68444	1.3124e-08	2.57858e-07	34.2222	1.07143
2020-03-01	96.0607	-1.1203	0.197108	-5.68368	1.3183e-08	2.58883e-07	86.3175	226.571
LINC00854	161.451	-1.4493	0.255056	-5.68227	1.32918e-08	2.60883e-07	123.508	410.571
OVOL1	57.6315	-2.42098	0.426075	-5.68205	1.33093e-08	2.61089e-07	38.1746	249.857
LINC00885	15.5242	-2.78644	0.490437	-5.68153	1.33491e-08	2.61733e-07	8.1746	73.0714
BEND6	17.7098	1.61693	0.284637	5.68067	1.34171e-08	2.62929e-07	21.3651	9.71429
LILRA5	7.39434	2.05366	0.361576	5.67975	1.34894e-08	2.64208e-07	9.42857	3
PTGER3	1361.76	-2.09662	0.369159	-5.67946	1.35118e-08	2.64509e-07	882.444	4698.14
CD4	403.855	1.27426	0.224467	5.67684	1.37207e-08	2.68319e-07	502.159	262.214
PIK3CG	191.587	1.1396	0.200775	5.67602	1.37863e-08	2.69461e-07	222.095	134.786
RNF175	15.2577	2.08188	0.36696	5.67331	1.40068e-08	2.73628e-07	17.1905	5.71429
TREM1	32.8712	2.34578	0.413649	5.67094	1.42016e-08	2.77146e-07	38.5714	10.7857
RP11-142A23.1	13.0116	2.06836	0.364772	5.67028	1.42563e-08	2.78068e-07	12.9841	4.42857
GREB1	762.161	1.97123	0.347774	5.66814	1.44357e-08	2.81128e-07	985.333	290.5
STMN2	6.60086	5.07844	0.896071	5.66746	1.44931e-08	2.81794e-07	9.42857	0.285714
NKG7	38.3089	1.98149	0.349619	5.66755	1.44851e-08	2.81794e-07	49.6508	16.1429
PTGDS	4203.57	3.20134	0.564854	5.66755	1.44857e-08	2.81794e-07	5689.57	779.286
RP11-677N16.1	34.5383	2.0519	0.362105	5.6666	1.45656e-08	2.82926e-07	38.873	11.9286
TMEM2	646.766	1.1212	0.197868	5.6664	1.45832e-08	2.82974e-07	774.032	455.857
FREM1	599.326	-1.90033	0.335365	-5.66647	1.45766e-08	2.82974e-07	448.825	2108.64
CALML3-AS1	28.8064	-3.22288	0.568833	-5.66578	1.46361e-08	2.83854e-07	13.1111	144.429
LINC00659	8.28334	-2.9271	0.516802	-5.66388	1.47991e-08	2.86867e-07	3.88889	43.6429
CCDC24	130.163	-1.1649	0.205713	-5.66273	1.48981e-08	2.88341e-07	109.651	336.714
AP1S2	422.27	1.84416	0.3257	5.66215	1.49492e-08	2.89179e-07	509.714	177.714
FAM171A1	687.63	-1.07736	0.190294	-5.66157	1.4999e-08	2.89845e-07	624.984	1722.71
AC110754.3	7.41003	6.11669	1.08063	5.66028	1.51124e-08	2.91885e-07	9.80952	0
ARHGAP30	313.637	1.19361	0.210905	5.65944	1.51864e-08	2.93164e-07	368.905	210.786
RP4-530I15.9	305.766	1.25544	0.22188	5.65821	1.5296e-08	2.94977e-07	328.778	188.929
RP11-349H17.2	10.9764	-2.21327	0.391232	-5.65719	1.53875e-08	2.96589e-07	6.90476	41.7857
RP11-475O23.3	8.563	-2.20708	0.390272	-5.65524	1.55626e-08	2.9981e-07	4.34921	24.8571
LINC00271	24.1638	-1.44119	0.254924	-5.6534	1.57302e-08	3.02883e-07	18.2063	65.9286
LINC00982	1394.09	-3.28526	0.58113	-5.65323	1.57465e-08	3.03041e-07	501.698	7857.57
SNHG12	421.813	1.53688	0.271865	5.65308	1.57594e-08	3.0306e-07	451.317	218
NIPA2P1	22.3466	3.60853	0.638335	5.65304	1.57636e-08	3.0306e-07	21.3968	2.92857
TBX15	22.0203	2.90465	0.513859	5.65263	1.58008e-08	3.0362e-07	28.7143	4.85714
RP11-175P13.3	32.5317	-1.19808	0.211995	-5.65143	1.59122e-08	3.05604e-07	27.6349	79.7857
MMP17	88.686	2.56549	0.453987	5.65102	1.595e-08	3.06174e-07	131.413	27.7857
RP11-826N14.4	6.74909	-2.09924	0.371638	-5.6486	1.61757e-08	3.10188e-07	4.66667	25.8571
C16orf54	50.195	1.56054	0.276351	5.64695	1.63316e-08	3.13018e-07	62.0317	28.5
CPNE7	199.605	3.00164	0.531563	5.64682	1.63447e-08	3.1311e-07	247.048	47.5
CDS2	2778.79	1.06482	0.1886	5.64588	1.64334e-08	3.14648e-07	3195.35	1963.86
ZAP70	135.506	1.56241	0.276749	5.64556	1.64641e-08	3.15075e-07	161.381	76.4286
TREML1	6.76447	2.09111	0.37043	5.64509	1.65097e-08	3.15787e-07	7.25397	2.42857
PROX1	255.65	-1.91004	0.3384	-5.64432	1.65836e-08	3.1704e-07	178.619	973.429
M6PR	995.904	1.25818	0.222915	5.64422	1.6593e-08	3.17057e-07	1244.52	653.714
RP11-35N6.1	65.4879	-2.621	0.464385	-5.64403	1.6611e-08	3.17079e-07	38.9365	303.357
RP11-96D1.6	5.58194	-1.69975	0.301155	-5.64411	1.66034e-08	3.17079e-07	4.15873	17.7143
PTTG1	14.8468	2.36015	0.418209	5.64347	1.66655e-08	3.17958e-07	19.9048	5
ADAM12	293.881	1.74113	0.308534	5.64324	1.66881e-08	3.18065e-07	364.508	149.214
DTX1	95.1953	-1.70474	0.302112	-5.64276	1.67347e-08	3.18792e-07	70.4444	330.929
TEK	224.567	-1.49701	0.265358	-5.64148	1.68592e-08	3.21e-07	193.968	680.357
VIL1	80.9264	-2.20787	0.391457	-5.64013	1.6992e-08	3.23364e-07	57.1746	312.143
TRPM1	60.8785	5.16711	0.916401	5.63848	1.71554e-08	3.2631e-07	148.984	2.57143
AFAP1L2	284.467	-1.45341	0.257807	-5.6376	1.72433e-08	3.27815e-07	242.841	880.571
SH2D2A	38.4251	1.76723	0.313498	5.63715	1.72889e-08	3.28516e-07	48.6667	19.9286
TRGC2	18.348	1.98237	0.351684	5.63679	1.73254e-08	3.29042e-07	23.2063	7.71429
AC006547.13	122.183	1.50446	0.266986	5.63498	1.75074e-08	3.32162e-07	133.968	64.2857
SEMA3A	56.6355	2.46216	0.436993	5.63433	1.75743e-08	3.33264e-07	75.5556	17.5714
TYMP	926.508	1.666	0.295808	5.63201	1.78121e-08	3.37433e-07	998.254	491.429
AP000997.3	10.1684	2.69724	0.478906	5.63209	1.78043e-08	3.37433e-07	12.2698	2.64286
DDX25	9.86463	-2.269	0.402989	-5.63041	1.79777e-08	3.40398e-07	6.61905	43
RP11-546M4.1	14.9984	3.22394	0.572791	5.62847	1.8181e-08	3.43967e-07	18.3651	2.64286
PDE7B	197.42	-1.16889	0.207718	-5.62727	1.83081e-08	3.45648e-07	176.095	507.571
CTD-2517M22.14	224.899	-1.32107	0.234763	-5.62725	1.83102e-08	3.45648e-07	180.238	622.357
LRRTM4	65.7948	3.83662	0.682085	5.62484	1.85681e-08	3.50164e-07	131.46	7.71429
HLA-DMB	410.529	1.14263	0.203152	5.62449	1.86061e-08	3.50705e-07	484.714	277.786
ASS1	749.264	-1.62586	0.289091	-5.62403	1.86548e-08	3.51446e-07	651.254	2332.21
C11orf42	9.79179	-1.35112	0.240252	-5.62377	1.86831e-08	3.51803e-07	8.06349	26.5
CACNA1E	423.684	2.13748	0.380151	5.62273	1.87963e-08	3.5358e-07	465.889	135.714
AC133644.2	106.653	2.16335	0.384799	5.62203	1.88728e-08	3.54841e-07	125.508	41.7857
WISP2	54.8533	2.75283	0.489846	5.61979	1.91185e-08	3.5928e-07	73.3333	15.6429
HYAL1	300.154	-1.18306	0.210564	-5.61853	1.92587e-08	3.61733e-07	246.127	728.571
AK5	164.416	3.14509	0.560321	5.61301	1.98839e-08	3.72918e-07	188.206	28.2857
BIRC5	30.3294	2.16397	0.385542	5.61279	1.99091e-08	3.73028e-07	33.5873	9.92857
TNNT2	49.782	-2.47624	0.441365	-5.6104	2.01858e-08	3.77824e-07	32.254	199.857
RP5-943J3.2	5.40337	-1.14217	0.203578	-5.61048	2.01771e-08	3.77824e-07	4.95238	14
RP11-284N8.3	40.7963	1.83966	0.327965	5.60931	2.03134e-08	3.80023e-07	47.2381	17.7857
TBC1D2	252.324	1.56835	0.279656	5.60812	2.04532e-08	3.82283e-07	292.937	140.214
LRAT	29.3052	2.26299	0.403521	5.60811	2.04545e-08	3.82283e-07	37.5556	10.5714
MNDA	52.8528	1.67936	0.299492	5.60736	2.05433e-08	3.8356e-07	66.7302	26.3571
DUSP10	79.1227	1.37125	0.24462	5.60563	2.07502e-08	3.8723e-07	97.2222	50.6429
BCAN	21.1361	2.44676	0.436512	5.60526	2.07937e-08	3.8785e-07	31.2857	7.14286
TNFRSF14	4825.51	1.72944	0.308554	5.605	2.08251e-08	3.88242e-07	4686.89	2225.43
RP11-4C20.3	10.8874	1.91143	0.341033	5.60482	2.08466e-08	3.8845e-07	13.2063	5
SYT12	42.0293	2.06624	0.368766	5.60311	2.10538e-08	3.91923e-07	46.6667	17.9286
PLD1	651.938	1.05555	0.188392	5.60295	2.10739e-08	3.92038e-07	688.286	418
RP11-527H14.4	8.00607	5.78665	1.0328	5.60289	2.10809e-08	3.92038e-07	8.71429	0.0714286
KDF1	40.8684	-1.78786	0.319109	-5.60268	2.11065e-08	3.92126e-07	31.4127	144.143
RP1-317E23.3	71.5393	-1.0468	0.186837	-5.60275	2.10977e-08	3.92126e-07	57.7778	167
TENM2	66.9035	-1.47152	0.262707	-5.60137	2.1267e-08	3.94913e-07	56.1429	188.786
RP11-803D5.1	269.369	1.5924	0.284362	5.59992	2.14448e-08	3.9782e-07	308.476	142.429
ENDOU	5.44704	-1.36462	0.243693	-5.59975	2.14662e-08	3.97823e-07	4.46032	14.7857
RP11-400N13.3	8.61312	6.05053	1.08077	5.59835	2.16406e-08	4.00859e-07	28.2381	0.0714286
PPP1R37	1374.85	1.56277	0.279265	5.59601	2.1934e-08	4.06093e-07	1366.57	700.786
CD209	101.174	1.8492	0.330534	5.5946	2.21137e-08	4.09125e-07	131.079	47.1429
SPON1	988.169	1.81863	0.325072	5.59455	2.21196e-08	4.09125e-07	1265.89	471
RP11-382A20.6	5.49132	4.34697	0.777019	5.59443	2.2135e-08	4.09208e-07	7.15873	0.428571
ABHD14A-ACY1	47.6183	-1.53415	0.274238	-5.59424	2.2159e-08	4.09451e-07	39.5873	143.5
HIST1H3F	20.3609	2.1286	0.380592	5.59285	2.23369e-08	4.12534e-07	26.9048	7.78571
TRPV4	245.478	-1.58005	0.282532	-5.59247	2.23857e-08	4.13232e-07	203.032	774.286
AC090286.4	40.5734	2.48688	0.444753	5.59159	2.25005e-08	4.15147e-07	43.2381	11.1429
AGTR1	66.2577	-1.7547	0.313872	-5.59049	2.26432e-08	4.17576e-07	49.8571	222.643
GBA	579.14	1.05525	0.188784	5.58974	2.27406e-08	4.1855e-07	645.444	405.643
FAM69B	196.625	-1.15627	0.206944	-5.58738	2.30524e-08	4.23872e-07	158.587	463
RASSF7	283.296	-1.55608	0.278544	-5.5865	2.31695e-08	4.25818e-07	219.381	900.214
WNK3	117.984	-1.21299	0.217141	-5.58617	2.32126e-08	4.26401e-07	103.381	307.429
RHBDF1	611.001	1.66661	0.298467	5.58392	2.35156e-08	4.31544e-07	714.143	324.714
AC007362.3	15.0107	1.90851	0.341811	5.5835	2.35722e-08	4.32371e-07	15.6825	6
PRRX1	218.024	2.17695	0.38993	5.58292	2.36511e-08	4.33608e-07	283.175	84.5714
KIF26A	210.485	-1.82056	0.326137	-5.5822	2.37489e-08	4.34976e-07	155.524	751.929
AC104777.3	5.46986	5.5525	0.994864	5.58116	2.38914e-08	4.37372e-07	6.26984	0
DHRS9	13.004	2.44347	0.437845	5.58067	2.39595e-08	4.38191e-07	30.3175	4
CXCL9	64.0902	2.21055	0.396105	5.58072	2.39529e-08	4.38191e-07	87.127	23.7857
KB-1572G7.3	9.28131	-1.7533	0.314188	-5.58043	2.39931e-08	4.38592e-07	6.61905	28.3571
GRIA3	20.0641	-1.73925	0.311718	-5.57955	2.4114e-08	4.40589e-07	15.5238	65.7143
GRIK4	38.0332	3.0561	0.54777	5.57916	2.41684e-08	4.41367e-07	50.0635	8.28571
PMP22	495.109	1.82115	0.326454	5.57857	2.42499e-08	4.4221e-07	639.984	227
KLHL4	81.3312	2.44286	0.437952	5.57791	2.43428e-08	4.43688e-07	95.3651	23
LINC01268	44.437	1.55827	0.279414	5.5769	2.44836e-08	4.4604e-07	53.5556	23.5714
METTL8	386.779	1.01202	0.181478	5.57656	2.45321e-08	4.4649e-07	418.397	272.214
ANKRD2	17.0764	-2.29594	0.411711	-5.57658	2.45296e-08	4.4649e-07	11.0794	76.2857
FCRLA	5.90536	3.01584	0.540819	5.57644	2.45491e-08	4.46581e-07	8.65079	1.35714
DDN	119.419	-2.81481	0.505205	-5.57162	2.52385e-08	4.58901e-07	66.7619	561.429
GJA5	137.245	-1.4789	0.265459	-5.57109	2.53156e-08	4.59857e-07	120.492	404.214
LRP5L	190.884	-1.11527	0.200258	-5.56914	2.55995e-08	4.64566e-07	160.095	482.929
LINC01543	4.5803	-3.1692	0.569171	-5.56809	2.57541e-08	4.67145e-07	2.20635	25.3571
CA8	54.1066	-2.26161	0.406334	-5.56587	2.60841e-08	4.72902e-07	36.3492	237.643
TFAP2A-AS1	10.0827	-1.92549	0.346025	-5.56461	2.62745e-08	4.76124e-07	7.25397	34.6429
TRIM7	40.5987	-1.13597	0.204159	-5.56415	2.63431e-08	4.76907e-07	34.4921	102.643
PCDH15	16.2487	-2.39397	0.430248	-5.56416	2.63411e-08	4.76907e-07	9.65079	64.2143
CEACAM19	69.3345	-1.26151	0.226773	-5.56286	2.65389e-08	4.79989e-07	56.6032	181.786
PACSIN3	78.9693	-1.17205	0.210739	-5.5616	2.67315e-08	4.83006e-07	68.873	200.357
FA2H	50.7615	-1.71719	0.308887	-5.55928	2.70892e-08	4.88998e-07	40.6032	168.286
IP6K3	179.483	1.96594	0.353638	5.55918	2.71047e-08	4.89044e-07	214.841	66.4286
IL1RL1	135.683	-2.15285	0.387267	-5.55908	2.71196e-08	4.89078e-07	92.4444	503.357
KIFC1	23.9726	2.05454	0.369623	5.55849	2.72119e-08	4.90506e-07	31.6349	10
THRB-IT1	47.6399	-1.50564	0.270891	-5.5581	2.72727e-08	4.91334e-07	35.1746	133.071
CKS2	25.8768	1.99512	0.359155	5.55503	2.77562e-08	4.99598e-07	34.5238	10.1429
MROH9	20.5015	2.66962	0.48059	5.55488	2.77802e-08	4.9977e-07	18.7302	4.07143
GNA13	1125.83	1.18606	0.21352	5.5548	2.77924e-08	4.9977e-07	1172.29	768.5
TMEM106A	542.894	-1.11844	0.201382	-5.55379	2.79546e-08	5.02122e-07	467.27	1245.14
CPEB1-AS1	35.7988	2.23179	0.401855	5.55373	2.79633e-08	5.02122e-07	33.1746	10.3571
ELF5	47.6702	-2.85117	0.51341	-5.5534	2.80173e-08	5.02753e-07	26.7778	250.429
RP5-858L17.1	71.2785	1.36228	0.245308	5.55335	2.80252e-08	5.02753e-07	68.7937	39.7857
ASPHD2	47.6771	-1.32657	0.238908	-5.55266	2.81357e-08	5.04494e-07	40.7619	138.929
VNN3	5.47682	3.0439	0.548427	5.55024	2.85272e-08	5.11271e-07	6.88889	1.14286
CCDC88B	319.304	1.65942	0.298991	5.55005	2.85587e-08	5.1159e-07	332.063	166.786
GCLM	195.128	1.05939	0.190898	5.54951	2.86464e-08	5.12916e-07	229.46	141.786
GINS3	34.3683	1.0303	0.185711	5.54784	2.89226e-08	5.17369e-07	41.1587	26.5714
SLC6A4	9.79681	-1.21344	0.218797	-5.54598	2.92317e-08	5.224e-07	7.65079	22.3571
ST3GAL5	416.211	1.15609	0.20852	5.54425	2.95216e-08	5.2733e-07	478.921	284.286
GPR39	40.2298	-1.46486	0.264267	-5.54312	2.97124e-08	5.30487e-07	34.8571	122.714
KIAA0226L	92.7294	1.64018	0.295905	5.54294	2.97443e-08	5.30802e-07	113.238	50.0714
IL7	69.8888	1.35345	0.244341	5.53918	3.03887e-08	5.41671e-07	65.5556	35.4286
CD109	861.584	1.70862	0.308484	5.53876	3.04629e-08	5.42595e-07	1098	404.071
GPD1	381.01	-1.75379	0.316825	-5.53552	3.10308e-08	5.52187e-07	306.587	1281.71
EVA1A	252.248	1.20323	0.217462	5.53306	3.14684e-08	5.59382e-07	283.762	163.357
C20orf197	11.5543	1.77009	0.319916	5.533	3.14798e-08	5.59382e-07	10.4762	4
TMEM144	144.37	1.15131	0.208116	5.53207	3.16467e-08	5.61816e-07	173.73	99.2857
RP11-834C11.5	7.03054	-1.52443	0.27559	-5.53151	3.17483e-08	5.63353e-07	5.47619	20.4286
PCK1	2061.58	-3.18459	0.575827	-5.53046	3.19394e-08	5.66476e-07	947.587	11341.4
RP11-626G3.1	18.1612	2.07345	0.374988	5.52937	3.21387e-08	5.69741e-07	21.1587	6.78571
EID3	63.1309	1.0807	0.195468	5.5288	3.22435e-08	5.71319e-07	73.7937	46.7143
CTSB	7003.06	1.10157	0.199257	5.52838	3.23193e-08	5.72132e-07	8203.27	4797.93
KREMEN2	11.0894	3.11866	0.564186	5.52772	3.24421e-08	5.74036e-07	11.873	2.14286
CTD-2639E6.9	6.2487	-1.4071	0.254567	-5.52745	3.24923e-08	5.74653e-07	4.98413	16.8571
RP5-864K19.6	101.355	1.51772	0.274632	5.52636	3.26936e-08	5.77941e-07	108.587	50.0714
RNASEH2B-AS1	12.7698	1.83124	0.331542	5.52341	3.3248e-08	5.86912e-07	11.5556	4.64286
C20orf24	243.963	1.14407	0.207178	5.52216	3.3485e-08	5.9054e-07	274.238	167.786
AC005392.13	5.36386	5.27579	0.955521	5.52138	3.36354e-08	5.92637e-07	6.01587	0.0714286
SSPN	293.868	1.06405	0.192769	5.51983	3.39329e-08	5.96759e-07	342.19	219.214
SLC6A17	40.2428	-2.05248	0.371833	-5.5199	3.39192e-08	5.96759e-07	30.1111	156.071
RPL17P1	4.39242	4.69046	0.849726	5.51997	3.39054e-08	5.96759e-07	5.90476	0.214286
RP11-317M11.1	24.6998	-3.75804	0.68081	-5.51995	3.391e-08	5.96759e-07	8.66667	158.857
SCRG1	40.1177	1.20119	0.21762	5.51966	3.39664e-08	5.97046e-07	45.7619	26.2143
AC079630.4	296.27	1.87624	0.339924	5.51958	3.39811e-08	5.97046e-07	342.032	137.143
RP11-94C24.13	55.6152	-2.84138	0.514798	-5.5194	3.40155e-08	5.97372e-07	28.9841	232.429
CLCNKB	767.354	-3.36453	0.609598	-5.51925	3.40442e-08	5.97595e-07	342.54	4312.07
RYR1	678.935	2.51499	0.455751	5.51834	3.42216e-08	6.0043e-07	788.508	203.286
PRKRIRP7	59.0148	1.75417	0.317939	5.51732	3.44204e-08	6.03634e-07	58.9048	24.1429
PYDC1	31.665	7.56294	1.37128	5.51523	3.48322e-08	6.10003e-07	43.0794	0.285714
CPNE5	394.726	2.27657	0.412793	5.51505	3.48687e-08	6.10124e-07	483.206	134.714
ANTXR1	1307.27	1.33593	0.242234	5.51503	3.48717e-08	6.10124e-07	1552.14	794.143
SLFN13	261.272	1.45363	0.263615	5.51422	3.5033e-08	6.12661e-07	316.683	157.857
LILRA2	19.1293	1.46098	0.264953	5.51411	3.5054e-08	6.12744e-07	21.4603	10.0714
PEBP1P3	9.6842	2.13679	0.387644	5.51225	3.5427e-08	6.18975e-07	11.9841	3.92857
MBL1P	26.8551	-1.58802	0.2881	-5.51204	3.54701e-08	6.1944e-07	21.0952	87.7857
UROS	547.812	1.0325	0.187323	5.51184	3.55092e-08	6.19835e-07	641.841	413.929
FCGR2C	292.144	1.49368	0.27114	5.50889	3.61103e-08	6.29855e-07	341.063	170.143
NAV3	182.6	1.57965	0.286858	5.50673	3.65565e-08	6.36636e-07	180.365	92.0714
RP11-800A3.4	15.8076	-1.33429	0.242328	-5.50613	3.66816e-08	6.38415e-07	13.4762	44.7857
CDC7	65.602	1.08702	0.197437	5.50565	3.67813e-08	6.39661e-07	76.0952	49.7857
RP4-625H18.2	27.2105	-1.27534	0.23165	-5.50549	3.68148e-08	6.39946e-07	22.2857	73.1429
E2F1	33.647	1.59044	0.28895	5.50421	3.70835e-08	6.4432e-07	42.254	18.0714
ALDH3A2	689.314	-1.01132	0.183761	-5.50346	3.72404e-08	6.46746e-07	620.46	1575
E2F8	11.0402	2.51797	0.45758	5.5028	3.73809e-08	6.48887e-07	14.9524	3.28571
DLGAP1	189.577	2.011	0.365484	5.50229	3.74897e-08	6.50474e-07	227.698	86.1429
RAP1GAP	1125.46	-1.73935	0.316184	-5.50106	3.77505e-08	6.54697e-07	874.016	4026.21
RP11-124N14.3	46.5911	1.17925	0.21439	5.5005	3.78721e-08	6.56502e-07	54.4762	32.7143
RPS20P20	8.36558	2.34137	0.425699	5.50006	3.79653e-08	6.57815e-07	9.06349	2.64286
GBP2	318.241	1.2428	0.226018	5.49868	3.82648e-08	6.62698e-07	401.143	218.786
STOM	1967.58	1.37718	0.250502	5.49768	3.8482e-08	6.65231e-07	2473.46	1170.64
LNX1-AS1	5.59221	-1.97181	0.358658	-5.49774	3.84685e-08	6.65231e-07	3.61905	20.2857
RP11-556H2.1	22.748	-1.05797	0.192469	-5.49684	3.8665e-08	6.68088e-07	17.8254	48.7857
NDNF	183.174	-2.78099	0.505944	-5.49664	3.87086e-08	6.68533e-07	106.921	852.571
EFNB1	370.75	-1.04272	0.189787	-5.49418	3.92527e-08	6.77248e-07	343.444	919.286
CCRL2	32.0324	2.17445	0.395779	5.49412	3.92673e-08	6.77248e-07	52.2063	11.2143
VAV3	674.316	-1.07888	0.196414	-5.49287	3.95457e-08	6.81423e-07	602.175	1599.29
ACBD4	261.041	-1.17845	0.214598	-5.49142	3.98707e-08	6.86395e-07	192.429	628.357
GAREML	128.804	1.44537	0.263219	5.49112	3.99397e-08	6.87268e-07	156.984	73.7143
RP11-57G10.8	6.20367	-1.47003	0.267726	-5.49079	4.00133e-08	6.88218e-07	5	17.3571
LGALS9	390.666	1.56051	0.284235	5.49021	4.01455e-08	6.90176e-07	462.603	213
RLTPR	54.4839	1.57429	0.286937	5.48653	4.09907e-08	7.03739e-07	65.4444	29.5
FLNC	728.306	1.94926	0.355323	5.48589	4.11399e-08	7.05978e-07	984.825	345.929
EFTUD1P1	5.04047	3.95994	0.722183	5.48329	4.17482e-08	7.15436e-07	6.8254	0.571429
GAS2L1P2	11.5563	-2.52462	0.460461	-5.48281	4.18618e-08	7.17054e-07	6.80952	46.0714
SSTR1	26.3713	-1.62656	0.296696	-5.48226	4.19929e-08	7.18972e-07	22.1905	82.2857
BAAT	41.8246	4.55551	0.831096	5.48132	4.22154e-08	7.22454e-07	113.556	3
RP13-452N2.1	50.8576	-1.58201	0.288635	-5.48102	4.22888e-08	7.2338e-07	39.6032	157
KLHL40	5.23148	4.90698	0.895345	5.48055	4.24007e-08	7.24759e-07	4.84127	0.0714286
CTD-2184D3.5	28.8115	1.66669	0.304111	5.48052	4.24081e-08	7.24759e-07	33.8571	13.9286
SLC8A1-AS1	75.3979	-1.48332	0.270861	-5.47632	4.34265e-08	7.41153e-07	60.9365	196.357
TMEM163	43.8548	1.58495	0.289471	5.47535	4.36638e-08	7.44863e-07	41.6349	19.0714
HOXB4	205.471	-1.15969	0.211821	-5.47486	4.37864e-08	7.46616e-07	176.889	546.714
LINC00839	44.6482	-1.65541	0.302517	-5.4721	4.4473e-08	7.57635e-07	33.3651	130.929
CPA4	6.49103	3.38782	0.619493	5.4687	4.53352e-08	7.71581e-07	7.80952	1.07143
DTHD1	22.0338	2.13793	0.390969	5.46829	4.544e-08	7.72707e-07	28.127	8.85714
APBA2	80.0633	1.5632	0.285888	5.46788	4.55446e-08	7.73784e-07	88.0159	41.3571
GYG1	255.771	1.30272	0.238249	5.46788	4.55443e-08	7.73784e-07	302.127	159
NANOGP8	8.397	-1.66741	0.305132	-5.46454	4.64097e-08	7.86702e-07	6.44444	27.7857
HLA-F	424.439	1.16568	0.213342	5.46388	4.65836e-08	7.89293e-07	486.683	296.786
F11-AS1	20.4685	-2.60716	0.477183	-5.46364	4.66466e-08	7.90005e-07	11.4444	94.6429
MS4A1	64.074	2.51619	0.460557	5.46335	4.6722e-08	7.90924e-07	87.8571	20
LINC01193	10.4065	5.97074	1.09309	5.46224	4.70172e-08	7.94488e-07	20.7778	0.214286
RP11-362F19.1	82.3514	-1.69602	0.310551	-5.46134	4.72549e-08	7.98146e-07	61.9841	265.429
ETF1P2	92.5151	1.0994	0.201321	5.46092	4.73662e-08	7.99359e-07	105.333	66.6429
RP11-378G13.2	7.30828	1.68269	0.308148	5.46066	4.7436e-08	8.00126e-07	8.46032	3.71429
RP11-560F18.1	17.0558	3.42783	0.627756	5.46045	4.74925e-08	8.00719e-07	16.6508	1.92857
TMC4	196.154	-1.82676	0.334553	-5.46031	4.7531e-08	8.01009e-07	147.302	712.643
AC106875.1	4.19481	5.29747	0.970365	5.45925	4.78147e-08	8.05428e-07	5.77778	0
CYP4F12	35.9793	-1.89463	0.347229	-5.45643	4.85797e-08	8.17214e-07	27.6508	122.857
RP11-657O9.1	17.5889	2.3391	0.428786	5.45516	4.89291e-08	8.22354e-07	20.9365	5.21429
RGS18	19.7821	1.658	0.30395	5.45486	4.90128e-08	8.23332e-07	23.9524	10
RP11-89N17.1	21.0546	-1.0765	0.197349	-5.45479	4.90311e-08	8.23332e-07	17.9841	49.2143
TJP3	80.1168	-2.08734	0.382681	-5.45451	4.91085e-08	8.24263e-07	58.127	323.429
RP2	107.108	1.06341	0.19497	5.45421	4.9192e-08	8.24928e-07	132.524	80.2143
ENPP6	55.0214	-2.6284	0.482003	-5.45308	4.95047e-08	8.298e-07	33.6984	237.786
RP11-426C22.4	37.3984	1.44757	0.265531	5.45161	4.99163e-08	8.36326e-07	43.0476	21.6429
AC141928.1	47.7363	-1.73017	0.31738	-5.45142	4.99691e-08	8.36838e-07	37.8095	165.071
MTHFD2P1	21.1133	2.45385	0.45024	5.4501	5.0341e-08	8.4269e-07	22.8571	5.64286
ACTG2	146.994	2.88706	0.529841	5.44891	5.06792e-08	8.47595e-07	212.603	38.9286
AOC1	375.09	-2.49373	0.45767	-5.44875	5.07248e-08	8.47981e-07	242.238	1686.57
KCNA3	88.1289	1.56401	0.2871	5.44761	5.10504e-08	8.53043e-07	85.6032	42.3571
TBC1D29	7.81879	-1.81511	0.333224	-5.44712	5.11926e-08	8.54659e-07	5.68254	26.7143
LCNL1	369.752	3.17667	0.583347	5.44559	5.16341e-08	8.61264e-07	488.127	65.4286
CTLA4	16.0416	2.42451	0.445263	5.44512	5.17708e-08	8.63162e-07	16.9841	4.64286
SLC6A8	3127.61	1.37099	0.251789	5.445	5.18051e-08	8.63349e-07	3478.46	1901.64
RP11-180C16.1	89.6378	-1.19798	0.220087	-5.44321	5.233e-08	8.70551e-07	75.1587	218
FAM162B	11.3239	-1.41648	0.260285	-5.44203	5.26782e-08	8.75955e-07	9.87302	34.4286
SCTR	74.0754	-1.90486	0.350194	-5.43943	5.34498e-08	8.88001e-07	51.8889	271.786
ABAT	666.579	-1.51529	0.278598	-5.43898	5.35877e-08	8.89897e-07	566.238	1979.36
LCK	60.8625	1.5795	0.290485	5.43744	5.40508e-08	8.97191e-07	76.9524	34.7143
RNF128	269.691	1.49082	0.274193	5.43713	5.41445e-08	8.97952e-07	320.841	140.786
AC061992.2	4.93308	3.20634	0.589985	5.43462	5.49131e-08	9.10297e-07	5.73016	0.928571
IDNK	56.9751	-1.04587	0.192497	-5.43317	5.53625e-08	9.17342e-07	50.0952	133.857
ADAM9	817.802	1.0092	0.185776	5.43236	5.5615e-08	9.2112e-07	947.524	603.643
STK32B	203.622	-1.26905	0.233617	-5.4322	5.56648e-08	9.21538e-07	167.143	544.286
2020-03-10	6.10935	-2.18271	0.40203	-5.42922	5.66009e-08	9.35796e-07	3.60317	21.6429
S1PR4	34.3131	1.7421	0.320897	5.42885	5.67182e-08	9.37323e-07	38.6984	16.1429
ZNF503	638.268	-1.34622	0.248089	-5.42637	5.75112e-08	9.49592e-07	511.54	1754.79
PCBD1	914.653	1.57773	0.290846	5.42461	5.80808e-08	9.58576e-07	1159.56	486.857
ATP6V0D2	157.855	-2.68007	0.494107	-5.42408	5.82538e-08	9.60985e-07	88.6508	705.857
APCDD1L-AS1	32.1517	-1.87882	0.346394	-5.42392	5.83051e-08	9.6101e-07	23.9206	109.643
CYP4A11	620.446	-3.61402	0.666359	-5.42354	5.84317e-08	9.62674e-07	226.111	3386
CAST	2903.03	1.41682	0.26128	5.42262	5.87314e-08	9.66764e-07	3635.56	1719.64
AC104777.1	5.46825	4.89542	0.903103	5.42066	5.93784e-08	9.76557e-07	6.74603	0.214286
SLC25A18	105.833	2.36565	0.436451	5.42019	5.95364e-08	9.78728e-07	127.032	30.1429
ATP6V1C1	1324.75	1.31659	0.242951	5.41917	5.9877e-08	9.83896e-07	1506.02	753.857
GZMH	9.61145	2.16976	0.400426	5.41862	6.00602e-08	9.86065e-07	10.9206	3.14286
DCLK1	262.724	1.74547	0.322124	5.41862	6.00615e-08	9.86065e-07	283.698	112.214
ANKRD20A8P	12.1874	-2.64453	0.488094	-5.41807	6.0247e-08	9.88678e-07	6.60317	55.2857
PRODH2	374.05	-2.54185	0.469334	-5.41588	6.09893e-08	1.00042e-06	240.603	1640
MYCN	38.7266	-2.50169	0.46201	-5.4148	6.13577e-08	1.00515e-06	18.7937	155.357
PLEKHM1	1176.13	1.40463	0.259453	5.41382	6.1695e-08	1.00979e-06	1306.17	699.071
SLC7A5P1	24.9893	1.91659	0.354141	5.41194	6.23455e-08	1.01955e-06	25.873	9.21429
MOGAT3	7.81168	-2.92388	0.540453	-5.41006	6.30053e-08	1.02984e-06	4.01587	38.2143
HIST1H2BM	11.7876	2.31936	0.428718	5.40999	6.30295e-08	1.02984e-06	16.3016	4
MEFV	18.3664	1.57772	0.291734	5.40809	6.37022e-08	1.04038e-06	21.4603	10.2143
RP11-90E5.1	5.8054	-1.6758	0.309971	-5.40629	6.43436e-08	1.05039e-06	4.44444	18.1429
CGN	269.096	-1.96104	0.362767	-5.4058	6.4521e-08	1.05238e-06	202.921	1002.36
NAMPTP1	35.6332	1.66925	0.308786	5.40585	6.45022e-08	1.05238e-06	45.4444	18.3571
RP4-530I15.6	6.74913	-2.2598	0.418054	-5.40551	6.46231e-08	1.05313e-06	4.1746	27
EMCN	307.873	-1.79958	0.333038	-5.40354	6.53374e-08	1.06338e-06	242.317	1042.29
IL16	308.632	1.28837	0.238429	5.40359	6.53189e-08	1.06338e-06	379.429	206.071
AMACR	1265.31	1.64518	0.304624	5.4007	6.63824e-08	1.07945e-06	1642.46	666.643
MICAL1	1106.4	1.15664	0.214176	5.40044	6.64794e-08	1.08056e-06	1237.95	774.214
AC002310.12	15.4701	-1.01185	0.187417	-5.39893	6.70408e-08	1.08922e-06	13.127	33.7857
PRR15L	69.0077	-1.80723	0.3348	-5.39795	6.7405e-08	1.09466e-06	52.2222	241.786
PBK	7.45915	3.22332	0.597148	5.39786	6.74403e-08	1.09476e-06	11.1746	1.42857
TDRD1	8.37508	-2.17924	0.403848	-5.3962	6.80683e-08	1.104e-06	5.49206	35.1429
LAMA3	352.526	1.71903	0.31857	5.3961	6.81061e-08	1.10414e-06	446.222	176.5
CCDC30	251.27	-1.02859	0.190669	-5.39461	6.86709e-08	1.11281e-06	221.556	577
AIF1L	2393.56	-1.61781	0.299942	-5.39375	6.9001e-08	1.11768e-06	1973.97	7746.07
TRPM2-AS	22.1649	2.67001	0.495029	5.39364	6.90449e-08	1.11791e-06	28.619	5.85714
EIF4EBP1	79.6696	1.11968	0.207636	5.39253	6.94708e-08	1.12383e-06	93.2698	53.4286
CCL4	70.5632	1.5686	0.290971	5.39091	7.01033e-08	1.1326e-06	84.1746	40.1429
NSUN7	127.276	-1.15485	0.214233	-5.39063	7.02121e-08	1.13338e-06	108.698	320
GP2	180.232	-3.7271	0.691439	-5.39035	7.03205e-08	1.13465e-06	63.1429	1085.43
HNRNPA1P57	16.1844	3.70952	0.688213	5.39008	7.04262e-08	1.13586e-06	17.3968	1.71429
LINC01426	31.6975	2.45888	0.456247	5.38936	7.07076e-08	1.13991e-06	38.4127	10.6429
CD163L1	135.194	1.81324	0.336476	5.38892	7.08816e-08	1.14223e-06	173.397	68.3571
IGFBP5	9040.69	-1.55802	0.289137	-5.38851	7.10445e-08	1.14436e-06	7874.21	28547.3
[truncated: 3,268 more rows]
