# Supplementary material for: Integrated exome and RNA sequencing of TFE3-translocation renal cell carcinoma
Source: Research Square preprint supplement (doi:10.21203/rs.3.rs-296261/v1), 2021-03-11
Supplement: Supplementary file 3 [file 691146ce05bedf4539907f11.xlsx]

## Sheet: clinicopathologic features
ID.	RNA seq	WES	Fusion	Retained TFE3 exons	Gender	Age(years)	Tumor size(cm)	Nephrectomy	Initial T stage	Initial N stage	Initial M stage	ISUP grade	Interval from diagnosis to metastasis	Survival status
TFE3-01	YES	YES	Unknown	NA	Male	10	3	2	1a	N0	M0	3	-	NA
TFE3-02	YES	YES	NONO-TFE3	6-10	Female	30	8.6	2	3	N0	M0	2	-	Alive
TFE3-03	YES	YES	NONO-TFE3	6-10	Male	40	4.7	2	1b	N0	M1	2	Synchronous	Dead
TFE3-04	YES	YES	Unknown	NA	Female	33	3.5	2	1a	N1	M0	3	Metachronous	Alive
TFE3-05	YES	NO	ASPSCR1-TFE3	6-10	Male	15	6	2	4	N0	M0	3	Metachronous	Dead
TFE3-06	YES	YES	MED15-TFE3	6-10	Female	26	5.9	1	2a	N1	M0	2	-	Alive
TFE3-07	YES	NO	ASPSCR1-TFE3	6-10	Female	6	4.6	2	1b	N1	M0	3	-	Alive
TFE3-08	YES	NO	SFPQ-TFE3	5-10	Male	12	12	1	2b	N0	M1	4	Synchronous	Dead
TFE3-09	YES	NO	ASPSCR1-TFE3	6-10	Female	13	19.6	2	2b	N0	M1	3	Synchronous	Dead
TFE3-10	YES	YES	SFPQ-TFE3	5-10	Female	23	4.7	1	1b	N0	M0	4	-	Alive
TFE3-11	YES	YES	Unknown	NA	Male	24	5.5	2	1b	N0	M0	3	Metachronous	Dead
TFE3-12	YES	YES	SFPQ-TFE3	5-10	Female	47	3.5	1	1a	N0	M0	2	-	Alive
TFE3-13	YES	YES	RBM10-TFE3	5-10	Female	63	3.8	1	1a	N0	M0	4	-	Alive
TFE3-14	YES	YES	ASPSCR1-TFE3	6-10	Male	22	6.8	2	1b	N1	M0	3	Metachronous	Dead
TFE3-15	YES	YES	SFPQ-TFE3	4-10	Female	39	3.1	1	1a	N0	M0	2	-	Alive
TFE3-16	YES	YES	ASPSCR1-TFE3	6-10	Male	21	4	2	1a	N0	M0	3	-	Alive
TFE3-17	YES	YES	PRCC-TFE3	4-10	Male	42	3.4	1	1a	N0	M0	2	-	Alive
TFE3-18	YES	YES	PRCC-TFE3	3-10	Male	41	5.6	2	1b	N0	M0	3	-	Alive
TFE3-19	YES	YES	NONO-TFE3	6-10	Male	62	3.9	2	1a	N0	M0	2	-	Dead
TFE3-20	YES	YES	Unknown	NA	Female	32	3.1	2	2a	N0	M0	2	Metachronous	Alive
TFE3-21	NO	NO	Unknown	NA	Male	40	4.1	2	1a	N0	M0	2	-	Alive
TFE3-22	YES	NO	PRCC-TFE3	5-10	Female	24	3	1	1a	N0	M0	2	-	Alive
TFE3-23	YES	YES	Unknown	NA	Female	10	4.5	2	1a	N1	M0	3	-	Alive
TFE3-24	YES	NO	ASPSCR1-TFE3	6-10	Female	17	7.4	1	4	N1	M0	3	Metachronous	Dead
TFE3-25	NO	NO	Unknown	NA	Female	30	4.3	1	1a	N0	M0	2	-	Alive
TFE3-26	NO	NO	Unknown	NA	Male	5	4.8	2	1a	N1	M0	3	-	NA
TFE3-27	YES	YES	MED15-TFE3	6-10	Male	48	4.5	2	1a	N0	M0	2	-	Alive
TFE3-28	YES	YES	FUBP1-TFE3	3-10	Male	56	6.5	2	1b	N0	M0	2	-	Alive
TFE3-29	YES	YES	MED15-TFE3	6-10	Female	51	3.6	1	1a	N0	M0	2	-	Alive
TFE3-30	YES	YES	SFPQ-TFE3	2-10	Male	37	2.8	1	1a	N0	M0	3	-	Alive
TFE3-31	YES	YES	MED15-TFE3	4-10	Female	39	3.3	1	1a	N0	M0	2	-	Alive
TFE3-32	YES	YES	ASPSCR1-TFE3	6-10	Female	23	6.9	2	1b	N1	M0	4	Metachronous	Dead
TFE3-33	YES	YES	SFPQ-TFE3	2-10	Male	44	4.7	2	1b	N0	M0	3	-	Alive
TFE3-34	YES	YES	ASPSCR1-TFE3	6-10	Female	45	2.1	2	1a	N0	M0	2		Alive
TFE3-35	YES	YES	PRCC-TFE3	5-10	Female	32	4.4	2	1b	N0	M0	2	-	Alive
TFE3-36	YES	YES	ZC3H4-TFE3	7-10	Female	43	11.2	2	3b	N1	M1	3	Synchronous	Alive
TFE3-37	YES	YES	SFPQ-TFE3	5-10	Female	24	17.5	2	2b	N1	M1	4	Synchronous	Dead
TFE3-38	YES	YES	MED15-TFE3	4-10	Female	22	13.4	2	2b	N0	M0	2	-	Alive
TFE3-39	NO	NO	Unknown	NA	Male	35	5.2	1	1b	N0	M0	3	-	Alive
TFE3-40	YES	YES	RBM10-TFE3	5-10	Male	37	10	2	3b	N0	M0	3	Metachronous	Alive
TFE3-41	YES	YES	NONO-TFE3	6-10	Male	70	5.3	1	1b	N0	M0	2	-	Alive
TFE3-42	YES	YES	RBM10-TFE3	5-10	Male	63	4.9	2	2b	N0	M0	3	-	Alive
TFE3-43	YES	NO	Unknown	NA	Male	58	3.2	1	1a	N0	M0	3	-	Alive
TFE3-44	YES	YES	NONO-TFE3	6-10	Female	41	5	2	3a	N1	M0	2	-	Alive
TFE3-45	YES	YES	ASPSCR1-TFE3	4-10	Female	31	7.9	1	2a	N0	M0	2	-	Alive
TFE3-46	YES	YES	RBM10-TFE3	5-10	Male	49	4	2	3a	N0	M0	3	Metachronous	Alive
TFE3-47	YES	YES	NONO-TFE3	6-10	Female	35	19.4	2	2a	N1	M1	3	Synchronous	Alive
TFE3-48	YES	YES	SFPQ-TFE3	5-10	Female	69	7.8	2	1b	N0	M0	3	Metachronous	Alive
TFE3-50	YES	YES	SFPQ-TFE3	5-10	Female	23	4.6	1	1b	N0	M0	2	-	Alive
TFE3-51	YES	YES	MED15-TFE3	6-10	Male	70	5.8	2	3a	N0	M0	2	-	Alive
TFE3-52	YES	YES	NONO-TFE3	6-10	Male	18	2.4	1	1a	N0	M0	2	-	Alive
TFE3-53	YES	YES	SFPQ-TFE3	6-10	Female	38	5.6	1	1b	N1	M0	4	-	Alive
TFE3-54	YES	YES	SFPQ-TFE3	2-10	Female	62	7	1	1b	N0	M0	3	-	Alive
TFE3-55	YES	NO	SFPQ-TFE3	6-10	Female	34	3.3	1	1a	N0	M0	2	-	Alive
TFE3-56	YES	NO	PRCC-TFE3	4-10	Female	37	6.1	2	1b	N1	M1	3	Synchronous	Alive
TFE3-57	YES	YES	SFPQ-TFE3	5-10	Female	25	5.2	1	1b	N0	M0	3	-	Alive
TFE3-58	YES	YES	SFPQ-TFE3	6-10	Male	12	3.7	2	1b	N0	M0	2	-	Alive
TFE3-59	YES	YES	PRCC-TFE3	4-10	Female	31	1.4	1	1a	N0	M0	2	-	NA
TFE3-60	YES	YES	MED15-TFE3	6-10	Female	47	6.5	2	1b	N0	M0	2	-	Alive
TFE3-61	NO	NO	Unknown	NA	Female	23	16.1	2	2b	N0	M0	3	-	Alive
TFE3-62	YES	NO	ASPSCR1-TFE3	6-10	Female	52	2.6	2	1a	N0	M0	3	-	Alive
TFE3-63	YES	YES	MED15-TFE3	4-10	Female	20	6	2	1b	N0	M0	2	-	Alive
TFE3-64	YES	YES	NONO-TFE3	6-10	Male	22	3	1	1a	N0	M0	2	-	Alive
TFE3-65	YES	YES	ASPSCR1-TFE3	6-10	Female	25	4	2	1a	N0	M0	3	Metachronous	Alive
TFE3-67	YES	YES	SFPQ-TFE3	6-10	Male	32	3.4	1	1a	N0	M0	2	-	Alive
TFE3-68	YES	YES	ASPSCR1-TFE3	6-10	Female	21	6.1	2	1b	N1	M0	4	Metachronous	Alive
TFE3-69	YES	YES	SETD1B-TFE3	4-10	Female	42	11	1	2b	N0	M0	4	Metachronous	Alive
TFE3-70	YES	YES	ASPSCR1-TFE3	6-10	Female	23	2	2	3a	N1	M0	4	-	Alive
