# Supplementary material for: Integrated exome and RNA sequencing of TFE3-translocation renal cell carcinoma
Source: Research Square preprint supplement (doi:10.21203/rs.3.rs-296261/v1), 2021-03-11
Supplement: Supplementary file 4 [file 8124440b06c563b39c358694.xlsx]

## Sheet: NMF_Cluster_1_DEGenes
GeneSymbol	logFC	AveExpr	t	P.Value	adj.P.Val	B
DAPL1	-5.19326	-0.0630327	-9.17757	7.85648e-13	2.45932e-08	18.5756
CYP11A1	-3.48491	0.288249	-8.94223	1.90242e-12	2.97757e-08	17.7385
CHST11	-1.80923	6.13565	-8.76812	3.67047e-12	3.82989e-08	17.4724
BICC1	1.91014	7.23447	7.96807	7.7144e-11	5.08494e-07	14.5293
SNCA	-2.75806	2.33871	-7.95462	8.12212e-11	5.08494e-07	14.4242
OR7E28P	-3.44309	-2.42068	-7.70793	2.09027e-10	1.09053e-06	12.9105
CYP4F22	-4.63101	-0.0841857	-7.62988	2.82002e-10	1.26107e-06	13.1047
ITLN2	-3.79166	-1.94474	-7.5312	4.11862e-10	1.53405e-06	12.4416
UGT3A1	4.00014	4.44244	7.50249	4.59857e-10	1.53405e-06	12.6511
GAREM	1.38913	6.09542	7.48592	4.90065e-10	1.53405e-06	12.7444
ITPKB	-1.37244	6.77346	-7.4262	6.16379e-10	1.75405e-06	12.5266
RGMA	-1.93771	2.63949	-7.35283	8.17021e-10	2.13127e-06	12.2273
ADAMTSL4	-1.74022	4.58972	-7.31061	9.60858e-10	2.31367e-06	12.0975
RAB29	1.40542	5.48803	7.22612	1.3292e-09	2.972e-06	11.7819
SAMD12	1.47333	5.34338	7.15021	1.77908e-09	3.71271e-06	11.5009
VGLL2	-4.92907	-2.52175	-7.04724	2.64174e-09	5.16839e-06	10.7728
CTSK	-4.43214	6.51736	-7.0281	2.84313e-09	5.2352e-06	11.0474
LIMS3L	-2.10753	2.51484	-6.98366	3.37184e-09	5.63128e-06	10.8763
RP11-1038A11.2	-3.16894	-2.9134	-6.98011	3.41802e-09	5.63128e-06	10.3071
KLHL38	-2.45671	-1.689	-6.94705	3.88026e-09	6.04488e-06	10.35
RP11-544M22.1	-3.62465	-1.91833	-6.93555	4.05528e-09	6.04488e-06	10.3828
ZDHHC19	-3.194	-2.3355	-6.89814	4.68101e-09	6.20744e-06	10.1526
SLC17A3	3.6839	3.71308	6.89522	4.73371e-09	6.20744e-06	10.4351
F2RL1	1.94012	4.32404	6.88882	4.85132e-09	6.20744e-06	10.5198
FLRT3	2.60788	5.5607	6.87744	5.06778e-09	6.20744e-06	10.4936
DNTT	-3.10374	-1.68871	-6.8679	5.25653e-09	6.20744e-06	10.1359
PAX8-AS1	2.02911	8.57088	6.8631	5.35415e-09	6.20744e-06	10.4377
LRRC36	1.92663	1.10124	6.84106	5.82616e-09	6.51344e-06	10.0407
RYR1	-2.70932	5.05418	-6.8265	6.16052e-09	6.64975e-06	10.3066
CRTAC1	-3.41282	4.02057	-6.80663	6.64803e-09	6.93677e-06	10.2369
RP11-116D17.4	-4.26589	-0.00277281	-6.78074	7.34124e-09	7.09632e-06	10.0632
FST	-3.57329	2.99853	-6.78058	7.3458e-09	7.09632e-06	10.142
LRRK2	1.88154	8.42215	6.77582	7.48102e-09	7.09632e-06	10.1148
TRDN	-3.64603	-1.8402	-6.7611	7.91483e-09	7.12795e-06	9.78325
KCNH1	-2.88241	2.87636	-6.75929	7.96979e-09	7.12795e-06	10.0631
MAPRE3	-0.95274	4.30001	-6.72967	8.92708e-09	7.76235e-06	9.95498
CHAT	-4.61298	-1.54496	-6.70734	9.72404e-09	8.2268e-06	9.68392
RP11-116D17.3	-4.29049	-0.476462	-6.68371	1.06442e-08	8.76834e-06	9.68164
TMEM35	-2.65308	-0.747219	-6.67462	1.10212e-08	8.84604e-06	9.55782
AIF1L	2.16548	7.12631	6.62615	1.32662e-08	1.03818e-05	9.56979
TMEM158	-2.35363	1.45507	-6.59128	1.5158e-08	1.1573e-05	9.42673
ARHGAP29	1.46772	7.85077	6.57006	1.64384e-08	1.22106e-05	9.35614
CLRN3	3.38701	1.17537	6.56478	1.67734e-08	1.22106e-05	8.93433
SLC17A1	3.80145	4.20847	6.5202	1.98867e-08	1.4148e-05	9.13259
PAX8	2.08766	8.69699	6.50312	2.12262e-08	1.47073e-05	9.10681
UBE2D3P3	-3.20251	-1.63126	-6.4984	2.16124e-08	1.47073e-05	8.87208
TMEM101	-2.16156	4.45715	-6.46235	2.47989e-08	1.65166e-05	8.97025
C1orf186	2.92408	2.71351	6.4525	2.57485e-08	1.67918e-05	8.8256
MITF	1.02577	5.5679	6.44624	2.63704e-08	1.68464e-05	8.91462
ROR2	-1.89675	4.65619	-6.43022	2.80312e-08	1.75492e-05	8.85144
LONRF2	-1.50923	4.99089	-6.41952	2.91984e-08	1.79215e-05	8.81069
ANXA4	1.33429	6.64987	6.39891	3.15835e-08	1.90126e-05	8.73425
RNF2P1	2.44601	-0.546303	6.37319	3.4834e-08	2.01994e-05	8.11797
SERTM1	-3.19566	-1.68037	-6.37078	3.51553e-08	2.01994e-05	8.42596
HNF1B	2.07205	7.10165	6.36455	3.59989e-08	2.01994e-05	8.60858
MARVELD3	2.20876	3.77193	6.36355	3.6136e-08	2.01994e-05	8.60233
DCDC2	1.82905	5.70017	6.30126	4.58006e-08	2.51525e-05	8.38803
ANGPTL2	-1.44843	6.54205	-6.27465	5.0676e-08	2.73502e-05	8.26761
MPP6	1.23037	5.20117	6.2321	5.95636e-08	3.14465e-05	8.13765
CDK6	1.45816	7.12251	6.22664	6.08115e-08	3.14465e-05	8.10012
CEND1	-1.76212	2.16024	-6.22462	6.12797e-08	3.14465e-05	8.11412
CDH6	2.17001	6.874	6.21062	6.46228e-08	3.26272e-05	8.0489
RP11-253E3.1	-2.59936	-2.78075	-6.19533	6.84826e-08	3.40271e-05	7.63439
GPR37	-3.01538	1.76939	-6.1876	7.05211e-08	3.44925e-05	7.98157
AC079630.2	3.55608	3.6776	6.18199	7.20355e-08	3.46912e-05	7.91191
RBPMS2	-1.51432	4.19313	-6.14064	8.42584e-08	3.99196e-05	7.80005
C14orf105	2.55577	6.43758	6.13695	8.54428e-08	3.99196e-05	7.78835
ZFPM2	-1.75939	4.01406	-6.13038	8.75979e-08	4.03246e-05	7.76379
RP11-863P13.5	-3.42145	-2.38945	-6.12573	8.91544e-08	4.04464e-05	7.52833
TMOD1	-2.3151	2.77295	-6.10481	9.65004e-08	4.31536e-05	7.68173
RASSF6	2.10052	3.79473	6.08689	1.03267e-07	4.55293e-05	7.61276
SLCO4C1	1.80416	5.9236	6.08301	1.04795e-07	4.55611e-05	7.59254
PARD6B	1.50105	5.59959	6.07816	1.06734e-07	4.57686e-05	7.57567
OCIAD2	1.61043	4.44502	6.0534	1.17209e-07	4.95809e-05	7.49911
ACE2	3.93349	5.7115	6.04916	1.19099e-07	4.97088e-05	7.48429
LINC01123	-1.45958	4.35951	-6.04544	1.20786e-07	4.97494e-05	7.45276
SLC24A3	-2.23333	3.27323	-6.02882	1.28613e-07	5.22855e-05	7.40313
RAB3IP	1.42042	6.449	6.02114	1.32398e-07	5.25125e-05	7.35837
PLS1	1.77953	3.69749	6.02088	1.32527e-07	5.25125e-05	7.38012
LPCAT4	-1.27596	3.9324	-6.01342	1.36314e-07	5.33381e-05	7.34341
AL035610.1	2.52645	3.3704	5.97624	1.56839e-07	6.06116e-05	7.20454
CA2	2.50693	5.68681	5.96281	1.64983e-07	6.29812e-05	7.16735
BLOC1S5	1.0996	4.59277	5.95389	1.70622e-07	6.43493e-05	7.13767
STAC	-1.59049	1.80647	-5.94098	1.79125e-07	6.67517e-05	7.09632
COBLL1	1.31361	8.06691	5.93334	1.84351e-07	6.78911e-05	7.02247
RAB19	2.34463	0.970448	5.91241	1.9946e-07	7.26011e-05	6.80208
CLEC3B	-2.20675	3.54752	-5.89227	2.1516e-07	7.74157e-05	6.90724
HAVCR1	3.70945	4.28134	5.8745	2.30028e-07	8.16154e-05	6.84939
AC079630.4	2.23899	4.70193	5.86985	2.34081e-07	8.16154e-05	6.84266
ACADL	1.74449	3.81556	5.8692	2.34654e-07	8.16154e-05	6.84172
FAM180B	-2.35346	-1.39551	-5.85962	2.43256e-07	8.33554e-05	6.66008
PLP1	-2.68622	0.749985	-5.85773	2.44983e-07	8.33554e-05	6.7918
RRS1-AS1	1.75704	1.61824	5.83307	2.68745e-07	9.04573e-05	6.64355
RP11-312J18.6	-2.76853	-2.47813	-5.79587	3.0898e-07	0.000102894	6.36374
COX7A1	-1.59795	3.15617	-5.78646	3.20069e-07	0.000105465	6.53703
LIMS3	-2.79969	-0.142555	-5.77582	3.33095e-07	0.000108613	6.47644
SLC25A18	-2.27873	2.65646	-5.77011	3.40291e-07	0.000109697	6.48235
KCNQ5	-2.57464	1.9389	-5.76713	3.44112e-07	0.000109697	6.4785
HTR1E	-4.63212	-2.62539	-5.76495	3.46933e-07	0.000109697	6.34743
GABRA5	-2.64812	-3.00551	-5.7554	3.59554e-07	0.000112551	6.14363
RHOBTB1	1.21893	5.98391	5.74436	3.74716e-07	0.000116136	6.36469
SLC1A1	1.96902	4.35809	5.73809	3.83612e-07	0.000117007	6.37548
TPMT	1.10303	4.52227	5.73465	3.88574e-07	0.000117007	6.3539
CTD-3118D7.1	2.39036	1.45692	5.73454	3.88739e-07	0.000117007	6.25581
CTD-2311M21.2	-2.57495	-0.300423	-5.72506	4.02761e-07	0.000120073	6.28885
GLDC	2.30809	4.47746	5.72209	4.07253e-07	0.000120267	6.31979
USH1C	2.03704	5.32166	5.71788	4.13721e-07	0.000121035	6.28953
C16orf96	-1.52102	0.94864	-5.70197	4.39051e-07	0.000127256	6.2407
TMEM178B	1.33503	5.61798	5.69354	4.53085e-07	0.000130119	6.18895
PTPRK	1.3182	6.20675	5.68615	4.65765e-07	0.000132544	6.15345
SNX18P3	1.36162	2.30425	5.66415	5.05611e-07	0.000140712	6.10329
TTC7B	-0.93292	5.80712	-5.66348	5.06865e-07	0.000140712	6.05982
FAM160A1	1.07273	5.35552	5.66123	5.11144e-07	0.000140712	6.07645
RP11-863P13.4	-3.0109	1.31737	-5.65794	5.17449e-07	0.000140712	6.09531
LRIG1	-1.02231	5.57591	-5.65732	5.18643e-07	0.000140712	6.04011
STK35	-0.711244	5.74842	-5.65584	5.2152e-07	0.000140712	6.03438
AIG1	1.14644	5.75306	5.65358	5.25932e-07	0.000140712	6.04312
NDN	-1.50632	3.50433	-5.65037	5.32263e-07	0.000141036	6.04686
CD177	-3.69913	1.20343	-5.64841	5.36154e-07	0.000141036	6.06135
AMIGO2	-1.92515	3.34819	-5.64316	5.46763e-07	0.000142628	6.02079
LINC01320	2.38156	6.13071	5.63826	5.56837e-07	0.000144055	5.99672
GOLGA7B	-1.95224	2.16517	-5.63022	5.73748e-07	0.000147213	5.99448
CDS1	1.3299	4.21837	5.62009	5.95808e-07	0.000151631	5.95361
GPR126	1.66767	5.93245	5.60647	6.26782e-07	0.000158227	5.87752
RP11-430E17.1	2.4449	-0.569511	5.60283	6.35334e-07	0.000159103	5.60109
GPAA1P1	-2.27686	-0.913641	-5.59575	6.52276e-07	0.000162049	5.80117
LINC01203	-2.58846	-3.00941	-5.58126	6.88386e-07	0.000169674	5.58869
TNFSF10	1.78215	5.41824	5.56618	7.28061e-07	0.000177827	5.74662
OR7E89P	-2.66194	-2.85785	-5.56442	7.32827e-07	0.000177827	5.55247
PTH2R	1.60008	3.45366	5.55883	7.48203e-07	0.000179926	5.74866
AMOT	1.37883	5.61589	5.55712	7.52973e-07	0.000179926	5.70461
APOC1P1	-2.36554	-2.25778	-5.55481	7.5945e-07	0.000180099	5.56301
CLDN1	2.47891	4.77487	5.54874	7.76762e-07	0.00018282	5.70649
FAM189A1	2.52944	3.61878	5.52769	8.39846e-07	0.000196192	5.63946
GDF15	-2.58825	6.18959	-5.52289	8.549e-07	0.000198229	5.54466
PLCXD2	1.07384	3.06371	5.51528	8.79351e-07	0.0002024	5.59691
AKR7A3	3.23809	3.51611	5.50968	8.97801e-07	0.000205138	5.57032
KCNH1-IT1	-2.76167	-3.13117	-5.49935	9.32831e-07	0.000211597	5.31573
CNN2P6	-2.88638	-0.67993	-5.48824	9.71989e-07	0.000218893	5.46913
CHIA	-2.91548	-2.36428	-5.48021	1.00131e-06	0.000223885	5.33519
ZBTB47	-0.99701	5.92054	-5.47118	1.03531e-06	0.000229847	5.37161
DNAJC22	1.62208	4.40096	5.46446	1.06137e-06	0.000231573	5.40724
CHSY3	-2.01005	2.44169	-5.46236	1.06964e-06	0.000231573	5.39945
KCNJ16	2.59464	7.12302	5.46086	1.07556e-06	0.000231573	5.35047
IL1R1	-1.22965	7.02619	-5.46063	1.07649e-06	0.000231573	5.32024
LYVE1	-1.67307	3.42065	-5.45973	1.08008e-06	0.000231573	5.37254
CCDC39	-2.60631	-2.35026	-5.44893	1.12404e-06	0.000239359	5.21473
TRPC1	-0.845329	3.94926	-5.44267	1.15033e-06	0.000243304	5.30697
KCNN2	-1.94259	0.722655	-5.43653	1.17671e-06	0.000245638	5.3215
PCDH7	-1.70867	4.95028	-5.43645	1.17707e-06	0.000245638	5.25889
ITGB8	1.98812	8.17774	5.43264	1.19376e-06	0.000247472	5.22849
GAS6	-1.10526	6.85585	-5.43011	1.20494e-06	0.000247718	5.21421
ST3GAL5	-1.05707	5.30525	-5.4288	1.21078e-06	0.000247718	5.23063
ABCB1	2.3693	5.31299	5.42227	1.24032e-06	0.000252115	5.24937
KCNA1	-3.46459	-0.291862	-5.41787	1.26063e-06	0.000254591	5.2493
RHPN2	1.26828	4.66943	5.40508	1.3215e-06	0.000265172	5.18696
AC010226.4	-0.922325	0.838278	-5.37982	1.45035e-06	0.000289174	5.12152
KANSL1L	1.01604	6.3553	5.36748	1.51777e-06	0.000298332	5.01594
CYGB	-1.51931	4.09547	-5.36717	1.51953e-06	0.000298332	5.03209
GLIS3	1.00419	6.60926	5.36621	1.52487e-06	0.000298332	5.00683
CDH2	1.96798	4.83784	5.36346	1.54036e-06	0.000299491	5.04851
DDAH1	1.43712	6.77396	5.3611	1.5538e-06	0.000300238	4.99046
HOGA1	1.42705	5.9375	5.34254	1.66353e-06	0.000319469	4.94067
TIMP2	-0.959501	8.78376	-5.33019	1.74078e-06	0.000332267	4.84691
ATP10B	-1.9359	0.351352	-5.32436	1.77843e-06	0.000337396	4.93135
FAM129A	-1.69227	5.86126	-5.31066	1.87015e-06	0.000352658	4.80075
KLHL40	-2.5907	-2.09329	-5.309	1.88159e-06	0.000352691	4.78133
MARVELD2	1.55168	3.68143	5.29774	1.96089e-06	0.000365368	4.84073
GRB7	2.30718	4.52537	5.29587	1.97437e-06	0.000365702	4.82634
RP5-842K16.1	1.91322	-0.653319	5.28996	2.0176e-06	0.000371511	4.6085
TMEM139	1.50956	3.72208	5.28828	2.03009e-06	0.000371625	4.80485
RP11-472F14.4	2.39034	-0.642652	5.28185	2.07844e-06	0.000378264	4.56569
WDR66	1.08012	4.01319	5.27693	2.11625e-06	0.000382919	4.75426
SLC22A5	1.20499	6.60043	5.27284	2.14821e-06	0.000386468	4.68076
MALT1	0.754277	6.1083	5.26802	2.18646e-06	0.000388971	4.66785
DRP2	-2.35452	-0.813231	-5.26795	2.18698e-06	0.000388971	4.70875
DKFZp779M0652	-2.01664	-2.03811	-5.26392	2.21946e-06	0.000392519	4.608
CPNE5	-2.35482	4.40546	-5.26064	2.2463e-06	0.000395033	4.6464
AC013271.3	-2.38905	2.19045	-5.25676	2.27839e-06	0.000398437	4.68553
DHCR24	1.65646	5.91129	5.25369	2.30414e-06	0.000400703	4.63246
OSBPL10	-1.60555	6.31942	-5.24515	2.37718e-06	0.000411122	4.5654
RP11-661P17.1	2.32407	-0.244341	5.23607	2.45747e-06	0.000422671	4.45156
ITGBL1	-1.75902	4.30359	-5.23305	2.48469e-06	0.000425017	4.55628
ZPLD1	-3.28048	-1.00787	-5.23116	2.50188e-06	0.000425633	4.59475
PRPSAP1	-0.720232	5.21725	-5.22786	2.5323e-06	0.000426271	4.52839
WFS1	-1.21009	5.74421	-5.22779	2.53287e-06	0.000426271	4.51497
MTUS2	-2.15561	0.935096	-5.22449	2.56365e-06	0.000429144	4.59554
CDKL2	1.24522	3.62281	5.21831	2.62209e-06	0.000436592	4.56193
BHMT2	1.52923	7.40896	5.20494	2.75322e-06	0.000456001	4.43354
TEX9	1.21601	3.90257	5.20149	2.78806e-06	0.00045934	4.49808
SCIN	1.86707	6.62804	5.19705	2.83357e-06	0.000464393	4.42325
HNF1A-AS1	2.30099	4.94626	5.19435	2.86158e-06	0.000466543	4.46611
ZBTB5	0.660659	4.89096	5.18892	2.91879e-06	0.000473403	4.41769
RP11-88H9.2	-2.20981	-0.764982	-5.18598	2.95032e-06	0.00047605	4.43889
GYG2	-1.67263	3.09686	-5.18357	2.97632e-06	0.000477783	4.41525
LRAT	2.65941	1.30033	5.17974	3.01812e-06	0.000482022	4.38089
SEC14L6	1.34221	3.28979	5.17671	3.05159e-06	0.000484892	4.42733
AMACR	1.60102	6.89776	5.15812	3.26523e-06	0.000516219	4.27966
RP11-1151B14.4	3.01507	2.58184	5.15515	3.30075e-06	0.000519213	4.34665
TRIM10	2.79344	0.445154	5.14614	3.41068e-06	0.000533823	4.1969
GLS	1.27379	8.72664	5.12395	3.69698e-06	0.000575753	4.13262
AC004019.13	-1.99107	-0.136685	-5.11402	3.83266e-06	0.000591559	4.21336
CYP2C9	3.79065	1.3302	5.11376	3.83626e-06	0.000591559	4.11012
UBE3D	0.730179	3.18875	5.10354	3.98112e-06	0.000610887	4.17212
METRNL	-1.09592	5.68642	-5.09474	4.11018e-06	0.000623015	4.05364
CHST2	-1.22128	4.01311	-5.09409	4.11984e-06	0.000623015	4.0852
VCAM1	2.37098	7.29392	5.09409	4.11986e-06	0.000623015	4.05929
WDR91	0.81431	6.08077	5.09256	4.14272e-06	0.000623459	4.05785
PTPRT	-3.00808	-0.684049	-5.0904	4.1753e-06	0.000625356	4.13255
LRRC19	1.74666	3.45151	5.08871	4.20095e-06	0.000626201	4.12937
C14orf132	-1.49328	5.41601	-5.08655	4.23396e-06	0.000628131	4.02613
FCGRT	-1.06658	6.61426	-5.08432	4.26828e-06	0.000630235	4.00342
RP11-20J15.5	-2.03957	-0.949835	-5.07743	4.37618e-06	0.000643134	4.06506
CLTB	-0.94038	4.69876	-5.07349	4.43892e-06	0.000649306	4.00036
AXIN2	-0.956463	4.21071	-5.07015	4.49305e-06	0.000654167	4.0009
FGF18	-2.03819	0.125308	-5.06677	4.54821e-06	0.000659132	4.06058
ZNF608	0.814597	5.75457	5.06507	4.5764e-06	0.000660161	3.96935
FEZF1	-3.19384	-2.7653	-5.06163	4.63359e-06	0.000664888	3.95499
MAP1A	-1.59737	5.93763	-5.05964	4.66702e-06	0.000664888	3.92373
RP11-30P6.6	3.7021	0.419881	5.0593	4.67289e-06	0.000664888	3.8855
NCEH1	1.02013	5.0522	5.04985	4.83517e-06	0.000683371	3.939
SSH2	0.585228	6.61639	5.04921	4.84645e-06	0.000683371	3.89579
FBXO32	-1.49636	6.53454	-5.04576	4.90727e-06	0.000688845	3.86841
GALNT14	1.61928	4.97653	5.03894	5.02952e-06	0.000702853	3.91462
RSPH14	1.55647	0.502634	5.03597	5.08378e-06	0.000707278	3.90158
FANCE	-1.11996	1.40753	-5.03398	5.1205e-06	0.000709235	3.94902
WASF3	-0.870712	4.51439	-5.03187	5.15963e-06	0.000711506	3.86305
NKX2-4	-3.1924	-2.99755	-5.02958	5.20251e-06	0.000712353	3.83753
LINC01579	-2.84804	-1.84572	-5.02911	5.21128e-06	0.000712353	3.89019
FAIM2	-1.89963	0.685332	-5.02714	5.24859e-06	0.000714333	3.92913
ADAMTS9-AS1	1.92057	6.67793	5.02394	5.30955e-06	0.000719502	3.82448
C2orf15	1.01258	1.19412	5.01204	5.54222e-06	0.000747794	3.87038
OXCT1-AS1	-1.86308	2.18598	-5.00003	5.78743e-06	0.000777527	3.80938
MME	2.50999	5.72535	4.99593	5.87352e-06	0.000785722	3.76666
CD200	1.32757	3.93214	4.9919	5.95939e-06	0.000793816	3.78302
DACT1	-1.08611	4.60378	-4.98823	6.03866e-06	0.000798075	3.70794
HNF4G	1.55527	3.95483	4.98806	6.04236e-06	0.000798075	3.77155
AC079779.7	-2.40495	-3.27356	-4.98386	6.13453e-06	0.000806846	3.63349
CSMD2	-1.92234	1.79033	-4.9807	6.20467e-06	0.00080984	3.75506
RP11-156K13.1	-1.74386	-0.0896311	-4.9805	6.20904e-06	0.00080984	3.77006
AC009542.2	1.25354	2.22255	4.97727	6.28154e-06	0.000815896	3.76308
CTD-2396E7.11	1.46992	2.15942	4.97361	6.36489e-06	0.000823306	3.75072
RP3-331H24.6	1.4066	6.66567	4.97015	6.44463e-06	0.00083019	3.63233
PRRG4	1.54094	3.0983	4.96373	6.59501e-06	0.000843385	3.71046
DIRAS2	-2.50398	4.71338	-4.96348	6.60094e-06	0.000843385	3.60895
SYT9	1.48333	2.7786	4.95951	6.69568e-06	0.000852012	3.70013
LGALS2	1.96375	1.96705	4.9571	6.75407e-06	0.000855714	3.69238
RP11-320G24.1	-3.85551	-1.53214	-4.95524	6.79921e-06	0.000855714	3.67619
PYGL	-1.20269	4.28191	-4.95493	6.80679e-06	0.000855714	3.60093
TRABD2B	1.72769	5.73452	4.95082	6.90797e-06	0.000864961	3.59184
RP11-863P13.6	-2.54353	-3.57566	-4.94791	6.98055e-06	0.000870567	3.49586
HNRNPA1P9	2.14024	0.0413354	4.94403	7.07846e-06	0.000879274	3.54945
TMEM27	3.41452	4.58128	4.93961	7.19159e-06	0.000889796	3.62535
OR4F13P	3.41198	-1.07657	4.929	7.47063e-06	0.000917669	3.40033
GULP1	1.46777	5.85523	4.92882	7.4755e-06	0.000917669	3.5092
RP11-568N6.1	2.48915	0.593424	4.92629	7.54358e-06	0.000920837	3.51641
RP11-1018N14.5	-2.45129	-1.07918	-4.92568	7.56014e-06	0.000920837	3.57202
UGT2B7	2.24559	4.88318	4.92194	7.66203e-06	0.00092963	3.53544
GRM8	1.82303	2.09652	4.91773	7.77874e-06	0.000935445	3.56476
RP11-330M19.1	2.10429	2.04675	4.91738	7.78842e-06	0.000935445	3.55983
TAGLN2P1	1.11969	2.09853	4.91698	7.79961e-06	0.000935445	3.56271
SH3BP5	-0.97867	5.88834	-4.90742	8.07138e-06	0.000964345	3.40585
FLJ27354	-1.06347	0.994263	-4.89973	8.29662e-06	0.000987487	3.50472
KCNE4	-1.58455	4.51678	-4.89614	8.40371e-06	0.000994448	3.38965
TYR	-2.81204	0.22421	-4.89564	8.41864e-06	0.000994448	3.4915
MDGA1	-1.49261	4.34114	-4.89335	8.48789e-06	0.000998858	3.38581
ANKRD18A	1.35789	2.8921	4.89226	8.52121e-06	0.000999024	3.47262
SLFN13	1.46829	4.59884	4.88809	8.64923e-06	0.00101025	3.41105
CASC19	1.48099	3.25273	4.8861	8.71098e-06	0.00101368	3.44805
C3orf58	-0.827883	4.27534	-4.88271	8.81708e-06	0.00102223	3.35867
ABO	1.80946	5.93464	4.8778	8.97311e-06	0.00103648	3.33899
CNNM1	1.74209	2.79695	4.87674	9.00724e-06	0.00103659	3.42521
LILRB5	-1.55639	3.54631	-4.87372	9.10513e-06	0.00104229	3.34125
GRM5-AS1	3.44048	0.559261	4.87316	9.1233e-06	0.00104229	3.31406
TNFRSF11B	1.97578	4.06952	4.86906	9.25763e-06	0.00105265	3.37658
SIGLEC11	-1.64038	1.17403	-4.86835	9.28127e-06	0.00105265	3.39469
PFKM	-1.08658	6.46862	-4.86556	9.37431e-06	0.00105936	3.25276
HNF1A	1.93429	4.52658	4.86094	9.53014e-06	0.0010731	3.33308
UNG	-1.01632	4.62464	-4.85778	9.638e-06	0.00108136	3.26218
DMBT1	-2.10652	-2.0611	-4.85615	9.69429e-06	0.00108379	3.29916
SCGB1B2P	-2.91074	-0.032589	-4.85277	9.81183e-06	0.00109302	3.35068
ENTPD7	0.756815	5.18286	4.8515	9.85646e-06	0.00109314	3.25325
DAAM2	-1.19343	5.86381	-4.85045	9.89354e-06	0.00109314	3.20996
SLC17A4	2.40307	3.10775	4.84976	9.91766e-06	0.00109314	3.3389
RAB33A	-2.06733	-1.35249	-4.84176	1.02049e-05	0.00112085	3.28567
CTB-129P6.7	-1.99947	1.02162	-4.83976	1.02779e-05	0.00112492	3.29835
ST3GAL4	-1.71187	5.62636	-4.83557	1.04323e-05	0.00113785	3.15922
RP11-815J4.7	-1.27172	-0.645597	-4.83345	1.05112e-05	0.00114248	3.27127
AJUBA	1.18553	5.31926	4.82937	1.06653e-05	0.00115521	3.18018
RAP2B	-0.768394	6.38963	-4.82511	1.08281e-05	0.0011686	3.11853
TRIM15	3.12391	0.0312856	4.82333	1.08972e-05	0.0011686	3.14093
CAMK1G	-1.9371	1.83484	-4.82323	1.0901e-05	0.0011686	3.224
RP11-43D4.3	-1.18749	2.44327	-4.8211	1.09837e-05	0.00117083	3.20855
AC026904.1	-2.20766	0.206979	-4.82021	1.10188e-05	0.00117083	3.24372
HGD	2.0184	3.99316	4.81982	1.10339e-05	0.00117083	3.21428
RP11-849N15.3	-1.83889	1.68393	-4.81727	1.11344e-05	0.0011775	3.20984
TCEB3B	-1.36171	2.13163	-4.81329	1.12932e-05	0.00118922	3.18889
RP11-409I10.2	1.94888	-0.392582	4.8126	1.13212e-05	0.00118922	3.11709
SNX30	0.869563	6.82438	4.80947	1.14475e-05	0.00119847	3.07392
ALPK2	2.27912	5.3439	4.80373	1.16837e-05	0.00121912	3.12025
RP11-429A20.4	-3.00344	-1.79176	-4.80221	1.1747e-05	0.00122165	3.16295
CSRNP2	-0.697222	5.7385	-4.79588	1.20142e-05	0.0012453	3.03144
LRRC39	-1.64359	0.494977	-4.79412	1.20897e-05	0.00124899	3.15755
IGF2BP1	2.74021	2.079	4.79221	1.21717e-05	0.00125332	3.1462
PPFIBP1	0.866366	7.29687	4.78484	1.24946e-05	0.00128235	2.98211
TTC26	0.96977	3.07631	4.77894	1.27587e-05	0.00130453	3.08665
KCNMB4	-1.40051	1.8223	-4.77816	1.2794e-05	0.00130453	3.08042
ATP7B	0.808463	4.88852	4.77435	1.29683e-05	0.00131726	3.00235
GRM5	1.9046	2.23952	4.77359	1.3003e-05	0.00131726	3.09159
RP11-52B19.1	2.50546	-1.64544	4.76235	1.35317e-05	0.0013664	2.88013
ABCC8	-1.90936	0.776128	-4.76038	1.36266e-05	0.00137156	3.04154
PDCD4-AS1	-1.34527	1.7394	-4.75355	1.39602e-05	0.00140063	3.00235
RP11-61I13.3	-1.45388	3.07574	-4.75154	1.40599e-05	0.00140612	2.94698
BBS12	1.27004	3.20686	4.74998	1.41376e-05	0.00140939	2.99258
PDZRN3	-1.50306	4.86328	-4.74558	1.43596e-05	0.00142698	2.8722
ANKRD33B	1.56073	6.73459	4.74391	1.44447e-05	0.0014309	2.86256
RP4-613B23.5	-2.93536	1.99501	-4.74222	1.45313e-05	0.00143493	2.93468
GCNT1P1	1.14152	0.16352	4.7403	1.46303e-05	0.00144017	2.95094
FOXD3	-2.7534	-2.42571	-4.73878	1.47092e-05	0.0014434	2.93064
DKK3	-1.44838	5.55439	-4.7328	1.50233e-05	0.0014696	2.81453
MAN1C1	-1.39826	5.69488	-4.72819	1.527e-05	0.00148823	2.7973
ADORA1	1.78323	3.28203	4.72748	1.53087e-05	0.00148823	2.92082
ABCC6P1	2.27768	2.25665	4.72375	1.55117e-05	0.00150329	2.92963
KCNJ3	1.83582	3.98371	4.71966	1.57375e-05	0.00151698	2.87879
RP4-613B23.1	-1.69547	-0.945848	-4.71943	1.57499e-05	0.00151698	2.90278
FBXO36	1.09306	2.36604	4.71729	1.58696e-05	0.00152382	2.9012
EXOSC7	-1.13035	4.13293	-4.71557	1.59663e-05	0.00152842	2.79578
CD55	-1.09019	4.8376	-4.70865	1.6361e-05	0.00156143	2.75264
SHANK2-AS3	1.44673	0.856572	4.70398	1.6633e-05	0.00158257	2.85413
KIAA0895	0.973826	3.83614	4.70142	1.67836e-05	0.00158851	2.8001
PYY	-1.99698	-3.10724	-4.70036	1.68467e-05	0.00158851	2.74052
SNTG1	-3.37033	-1.073	-4.70034	1.68478e-05	0.00158851	2.85284
AP000688.29	1.53274	0.980635	4.69592	1.71125e-05	0.00160863	2.83166
CIDEA	-2.44394	-2.72994	-4.69451	1.71976e-05	0.00161179	2.76542
XPO5	0.626025	5.56648	4.69347	1.72608e-05	0.00161288	2.70765
DNAH7	1.16511	4.95299	4.6852	1.77709e-05	0.00165286	2.70906
TNFRSF11A	-1.51512	2.92627	-4.68483	1.77943e-05	0.00165286	2.72922
CD163L1	-1.54709	3.42266	-4.68255	1.79377e-05	0.00165665	2.70242
FYN	-1.21833	5.44213	-4.6825	1.79409e-05	0.00165665	2.65008
RP13-1039J1.4	-2.72276	-0.431644	-4.67671	1.83101e-05	0.00168161	2.77743
SCN4B	-1.54186	4.18483	-4.67637	1.83322e-05	0.00168161	2.65776
CR1L	-2.08357	1.13231	-4.67575	1.83724e-05	0.00168161	2.75382
WDFY3	0.559997	8.18135	4.67478	1.8435e-05	0.00168243	2.59637
MT1F	1.84928	3.29252	4.67184	1.86268e-05	0.00169499	2.74074
KNOP1P4	-2.11193	-2.22755	-4.67006	1.87438e-05	0.00170069	2.70402
WDR72	1.73048	6.56817	4.66409	1.91413e-05	0.00173174	2.60168
PNP	1.24022	5.48022	4.65574	1.97118e-05	0.00177821	2.59526
UGT3A2	3.49991	0.659651	4.65414	1.98229e-05	0.0017831	2.636
MTND4P20	3.02109	-0.635288	4.64813	2.02454e-05	0.00181588	2.57345
CCDC64	1.42816	7.07826	4.64487	2.04787e-05	0.00183156	2.52123
RP11-355N15.1	1.79598	1.96545	4.64289	2.06212e-05	0.00183905	2.66845
GNRHR	1.3111	1.72793	4.63759	2.10086e-05	0.00186827	2.65116
LRRC8D	0.843091	5.10788	4.63478	2.12169e-05	0.00188146	2.52869
ST3GAL5-AS1	-1.255	-0.517186	-4.63084	2.15119e-05	0.00190223	2.62553
RP11-390F4.6	1.879	-1.57939	4.62465	2.19839e-05	0.00193848	2.48111
CNKSR3	1.19105	6.85589	4.62384	2.20461e-05	0.00193851	2.45317
AFTPH	0.810149	5.98111	4.61751	2.2541e-05	0.00197329	2.44642
ITGAM	-2.0708	4.74822	-4.61717	2.25677e-05	0.00197329	2.44016
AC006994.3	1.91437	-0.041567	4.61426	2.27985e-05	0.00198791	2.52306
ASRGL1	1.41596	4.73843	4.61022	2.31231e-05	0.00201061	2.47408
FAM155B	1.7019	1.96307	4.6085	2.32627e-05	0.00201716	2.55718
SLC27A1	-1.03937	6.18781	-4.60046	2.39267e-05	0.00206104	2.36371
SH2B3	-0.732169	6.66393	-4.60015	2.39524e-05	0.00206104	2.35743
RP11-750H9.5	-1.01901	2.20447	-4.59999	2.39664e-05	0.00206104	2.48486
PHF7	-0.765416	2.95192	-4.59863	2.40805e-05	0.00206519	2.4571
KIAA1958	0.854605	6.5393	4.59751	2.41752e-05	0.00206764	2.36737
ZNF195	0.840783	5.34562	4.59303	2.45568e-05	0.00209455	2.38316
RP11-116D17.5	-2.25042	-2.89391	-4.59047	2.47776e-05	0.00210764	2.4262
LINC00472	1.13657	8.99107	4.58882	2.49208e-05	0.00211408	2.30405
CDKL5	0.954347	5.53305	4.58781	2.50083e-05	0.00211577	2.36208
HNRNPDLP2	1.49298	0.68759	4.58585	2.51803e-05	0.00212458	2.47526
RP11-449J21.5	1.4274	1.31769	4.57822	2.5861e-05	0.00217614	2.46104
AC005281.1	2.45282	0.907909	4.57334	2.63045e-05	0.00220753	2.42349
KCTD19	1.50361	-0.0279694	4.57076	2.65431e-05	0.0022216	2.40126
MTHFD2P2	-2.63636	-3.62056	-4.56885	2.67202e-05	0.00223046	2.33598
APOOP1	2.23931	-1.90627	4.56183	2.73823e-05	0.00227965	2.26938
LINC01507	1.41742	0.941112	4.55935	2.76198e-05	0.00229332	2.39859
AC019100.3	-2.27619	-1.23923	-4.55458	2.80828e-05	0.00232289	2.37999
RAB17	1.53644	5.21901	4.55416	2.81244e-05	0.00232289	2.27315
FGFR3	1.59864	5.63068	4.55294	2.82437e-05	0.00232661	2.2556
SORD2P	1.6605	2.649	4.55027	2.85078e-05	0.0023422	2.35825
RPL7P29	-3.22668	-3.17909	-4.54907	2.86273e-05	0.00234587	2.32121
TDRD6	-1.20201	3.15871	-4.54579	2.89566e-05	0.00236665	2.26636
GPR161	-0.788175	3.98414	-4.54235	2.93046e-05	0.00238342	2.22983
CPNE8	0.923644	4.28092	4.54161	2.93808e-05	0.00238342	2.25516
CELSR1	1.23876	7.304	4.54152	2.93901e-05	0.00238342	2.17105
RP1-86D1.5	1.85192	-0.22392	4.53846	2.97041e-05	0.00240158	2.28259
AC072062.1	1.4527	-0.689509	4.53785	2.97675e-05	0.00240158	2.26867
PIH1D2	1.21512	0.931377	4.53626	2.99323e-05	0.00240867	2.32599
SNHG22	-0.906698	6.71323	-4.53243	3.03345e-05	0.00243477	2.13022
RP11-678G14.3	2.06017	0.673795	4.52893	3.07059e-05	0.00245828	2.28644
LEP	-2.49518	-1.41226	-4.52612	3.10071e-05	0.00246859	2.28885
PDE3A	-1.38089	5.25837	-4.52572	3.10501e-05	0.00246859	2.13062
GRTP1	0.940805	3.6325	4.52552	3.10713e-05	0.00246859	2.22946
ARHGEF28	0.87492	7.25322	4.52081	3.15839e-05	0.00249774	2.09943
PODNL1	-1.9412	1.70103	-4.52069	3.15977e-05	0.00249774	2.23009
PHLDB2	0.804104	6.85405	4.51646	3.20651e-05	0.0025283	2.09197
MYRIP	-1.38426	4.3547	-4.51376	3.23667e-05	0.00254567	2.11574
IQUB	1.30598	3.11511	4.50979	3.28166e-05	0.00257458	2.208
LINC01186	2.12382	-1.76725	4.50826	3.29909e-05	0.00258179	2.11935
MANF	-0.781605	4.26362	-4.50691	3.31466e-05	0.0025875	2.10328
AL356289.1	1.66185	0.323664	4.50162	3.37597e-05	0.00262881	2.1973
NUAK2	1.35602	5.50116	4.49682	3.43271e-05	0.00266636	2.06935
SPX	2.07527	4.51511	4.49543	3.44922e-05	0.00267255	2.12625
RP11-244N9.6	-2.08234	-1.75422	-4.48673	3.55482e-05	0.00274328	2.15396
NRN1	-1.65109	1.72131	-4.48634	3.55956e-05	0.00274328	2.12417
PAQR5	1.3992	5.35117	4.48576	3.5668e-05	0.00274328	2.04075
CR1	-1.70148	3.98383	-4.48129	3.62234e-05	0.00277475	2.01674
UNC5CL	2.02695	4.35551	4.48105	3.62544e-05	0.00277475	2.08381
RP11-644F5.11	-0.714397	2.72069	-4.48029	3.63495e-05	0.00277524	2.08176
RASSF4	1.08939	7.39413	4.47905	3.6506e-05	0.0027804	1.96172
USP35	-0.881249	4.87023	-4.47566	3.69373e-05	0.00280643	1.98163
DUSP27	-1.75355	-1.29163	-4.47186	3.7425e-05	0.00283569	2.11561
SPATA31C2	-2.86272	-1.96956	-4.47126	3.75036e-05	0.00283569	2.1115
CSF1	-1.08266	6.08893	-4.46928	3.77616e-05	0.00284832	1.93081
SLC4A3	-1.28988	3.67405	-4.46815	3.79084e-05	0.00285119	1.98928
DIO3	-2.20573	-2.24	-4.46715	3.80406e-05	0.00285119	2.08098
PTPRM	-0.662286	8.08763	-4.4669	3.8073e-05	0.00285119	1.89924
GBA3	3.03508	4.00322	4.46507	3.83141e-05	0.0028624	2.07257
C1QTNF4	-1.72239	0.0641414	-4.46155	3.87834e-05	0.00288618	2.08881
KCNQ5-IT1	-2.03977	-2.21593	-4.4613	3.88168e-05	0.00288618	2.06054
KCND3	-1.58459	2.90616	-4.45195	4.00912e-05	0.0029736	1.96362
TF	-1.32943	1.87945	-4.45129	4.01825e-05	0.0029736	2.00834
RPL21P40	-2.89443	-1.47706	-4.45006	4.03541e-05	0.00297925	2.05394
GATA6-AS1	-1.47349	0.557826	-4.44714	4.07622e-05	0.00300231	2.03516
ZBTB20	1.04662	9.81615	4.44588	4.09398e-05	0.0030083	1.82434
C6orf165	1.29578	0.527099	4.44315	4.13276e-05	0.00302969	2.02865
CEBPB	-1.31242	5.84851	-4.44224	4.14577e-05	0.00303213	1.84453
TMEM108	-2.08246	0.285407	-4.44107	4.16251e-05	0.00303256	2.01725
AC000099.1	1.81343	-1.55058	4.44085	4.16574e-05	0.00303256	1.93459
PDZK1	2.06087	5.93927	4.43636	4.23073e-05	0.00307273	1.87371
LAYN	-1.44545	2.41706	-4.43444	4.25878e-05	0.00308594	1.93024
TSPAN12	1.36494	5.53834	4.43276	4.2835e-05	0.00309669	1.85963
C11orf52	0.98537	2.41427	4.43015	4.3222e-05	0.00311746	1.97027
SH3PXD2B	-1.54339	7.71845	-4.42758	4.36066e-05	0.00313797	1.76977
RP11-352D13.6	1.62018	2.94781	4.42577	4.38799e-05	0.00314855	1.94998
ALK	-1.30144	1.70559	-4.42527	4.39548e-05	0.00314855	1.93521
LINC01531	-2.75686	-1.55574	-4.42456	4.40623e-05	0.00314905	1.97279
SMTNL2	1.76857	5.12334	4.42312	4.42822e-05	0.00315755	1.85326
DZANK1	0.781778	2.80654	4.42031	4.47119e-05	0.00318094	1.91888
ACYP2	-0.55079	3.41146	-4.41951	4.4836e-05	0.00318254	1.85548
NUP62CL	1.55749	0.657636	4.41822	4.50359e-05	0.0031895	1.95137
TSPAN1	2.1275	4.62345	4.41721	4.51919e-05	0.00319282	1.86947
ADCY6	-0.737281	7.12385	-4.41643	4.53133e-05	0.00319282	1.74406
ULBP3	1.4375	1.36264	4.41512	4.55179e-05	0.00319282	1.94672
TMEM169	1.41887	1.8469	4.41486	4.55585e-05	0.00319282	1.93951
DCDC1	1.4062	2.04803	4.41465	4.55927e-05	0.00319282	1.93578
TRAK1	-0.591859	7.38903	-4.41312	4.58336e-05	0.00320252	1.73069
BAI1	3.44664	5.57033	4.41162	4.60704e-05	0.0032119	1.84314
SORD	1.1857	5.1157	4.40564	4.70269e-05	0.00326246	1.78354
ZNF165	1.38952	0.95584	4.40534	4.7075e-05	0.00326246	1.9161
STRBP	0.69443	4.79284	4.40514	4.71084e-05	0.00326246	1.78222
FAM35A	0.617022	5.44007	4.4033	4.74077e-05	0.00327594	1.7524
RP11-568K15.1	0.803113	5.45312	4.3988	4.81461e-05	0.00331964	1.74136
ASB13	1.0501	4.77086	4.39268	4.91682e-05	0.00338266	1.75086
AC006994.1	1.08025	2.17762	4.38374	5.07014e-05	0.00348049	1.83001
ABCC6P2	1.84551	0.610234	4.38212	5.09839e-05	0.00349223	1.83593
TSKS	-1.76496	-2.01004	-4.37797	5.17154e-05	0.0035346	1.80851
IGSF21	-1.21191	1.1604	-4.37624	5.20219e-05	0.00354394	1.7978
RP11-119D9.1	1.85181	2.63298	4.37593	5.20784e-05	0.00354394	1.80723
SLC35F4	1.68828	-0.0846814	4.37014	5.31221e-05	0.00360712	1.779
FAM133CP	1.37814	1.83865	4.36771	5.35657e-05	0.00362937	1.79076
RP11-151A6.6	-1.79442	2.00194	-4.36418	5.42177e-05	0.00366296	1.71679
AC019181.3	1.44596	0.787771	4.36376	5.42955e-05	0.00366296	1.78562
MRGPRF	-1.91764	3.35529	-4.36168	5.46829e-05	0.00367362	1.64763
PRCD	-1.14175	2.57848	-4.36165	5.46882e-05	0.00367362	1.69539
RSPRY1	0.531772	5.14263	4.35977	5.50425e-05	0.00368731	1.61887
RP11-453N18.1	1.192	1.03248	4.35932	5.51276e-05	0.00368731	1.77319
CTD-3099C6.9	0.933434	4.75987	4.35783	5.54092e-05	0.00369824	1.63661
RALY	-0.487205	6.14347	-4.35671	5.56221e-05	0.00369994	1.56818
FAM198A	-1.10686	2.19185	-4.35645	5.5671e-05	0.00369994	1.69819
DMRTA1	1.50934	3.29315	4.34929	5.70514e-05	0.00378034	1.69216
AKR7L	1.67903	1.79125	4.3485	5.72056e-05	0.00378034	1.73464
DMGDH	1.67697	5.50146	4.34831	5.72431e-05	0.00378034	1.59648
INADL	0.822553	7.38382	4.3451	5.78739e-05	0.00380615	1.52157
LRP2	2.29725	8.98879	4.34509	5.78772e-05	0.00380615	1.51129
IPO8P1	-2.0723	-0.324945	-4.34308	5.82757e-05	0.0038155	1.71989
PDZK1IP1	2.13552	6.35558	4.34224	5.84424e-05	0.0038155	1.5569
PROK1	-2.44286	-2.4697	-4.34192	5.8508e-05	0.0038155	1.69663
PCYT1A	-0.542425	6.29039	-4.3414	5.86122e-05	0.0038155	1.51526
TFEC	1.40842	4.80068	4.34131	5.86287e-05	0.0038155	1.59551
FANCC	0.865336	6.08708	4.33651	5.95985e-05	0.00387057	1.52205
ACACB	-0.725031	6.92409	-4.33501	5.9905e-05	0.00388001	1.48177
TNFRSF19	1.41599	4.81875	4.33459	5.99919e-05	0.00388001	1.57284
RP11-426C22.8	-1.60697	-0.502105	-4.33265	6.03898e-05	0.0038977	1.69054
SPA17	0.842801	2.07526	4.3239	6.22196e-05	0.00400753	1.64066
RP11-511B23.3	-1.71937	-1.70676	-4.32314	6.23818e-05	0.00400973	1.65021
RP11-197K3.1	1.24149	2.31375	4.32196	6.2633e-05	0.00401762	1.6356
RP11-528A4.2	1.68556	-0.740383	4.31821	6.34404e-05	0.00406109	1.60224
A4GNT	1.73195	0.84711	4.31627	6.38602e-05	0.00407962	1.63877
HOMER1	-1.02684	4.32905	-4.31493	6.41537e-05	0.00409003	1.47318
RP3-428L16.2	-1.28681	0.529938	-4.31369	6.44253e-05	0.00409899	1.61767
RP11-728E14.3	-2.05146	-2.87325	-4.31201	6.47947e-05	0.00411413	1.58321
NECAB2	-1.715	2.53334	-4.31024	6.51872e-05	0.00413068	1.52031
ERBB2	1.16896	7.5382	4.30877	6.55136e-05	0.00414297	1.405
HSPA8P4	-1.75455	-0.607203	-4.30394	6.66003e-05	0.0042025	1.60215
TYRO3	1.47487	4.05508	4.3034	6.67233e-05	0.0042025	1.5121
SLC2A12	-1.79583	2.3525	-4.297	6.81921e-05	0.00428634	1.48454
REPS2	1.41221	4.69164	4.29641	6.83283e-05	0.00428634	1.45654
UGT2A3	2.61076	4.4331	4.29442	6.87921e-05	0.0043068	1.49964
RP11-323A7.1	-1.99874	-3.35865	-4.29202	6.9357e-05	0.0043335	1.50313
RP3-439F8.1	1.28462	1.425	4.2838	7.13229e-05	0.00444745	1.5367
NXNL1	-2.04625	-2.33074	-4.28223	7.17034e-05	0.0044564	1.51446
SATB2	1.13187	5.44446	4.28204	7.17511e-05	0.0044564	1.37052
FAM201A	1.39731	2.04593	4.28138	7.19123e-05	0.00445757	1.51724
NAGS	-1.70598	2.08609	-4.28036	7.21603e-05	0.00446403	1.44791
SYNE3	-1.20778	4.7921	-4.27979	7.23018e-05	0.00446403	1.34391
STAB1	-1.30048	7.71394	-4.27504	7.34757e-05	0.00452758	1.27501
PXYLP1	0.811158	4.21214	4.27386	7.37715e-05	0.00453688	1.38904
OXR1	0.830352	6.06445	4.2707	7.45663e-05	0.00457474	1.30958
PRSS8	2.55428	5.05185	4.27026	7.46795e-05	0.00457474	1.39213
RP5-887A10.1	2.18116	-1.32001	4.26878	7.5054e-05	0.0045887	1.43066
MRPL40P1	-1.81184	-2.59852	-4.26432	7.61982e-05	0.00464777	1.44712
CTD-2314G24.2	-2.06403	-3.59415	-4.26386	7.63171e-05	0.00464777	1.41542
KIAA1522	1.14143	6.58126	4.263	7.65393e-05	0.00465225	1.27699
TRPM3	1.32453	6.36984	4.26007	7.73036e-05	0.0046896	1.27654
HHATL	-4.22643	5.09895	-4.25728	7.80381e-05	0.00471658	1.24298
CTC-498M16.2	2.09018	-1.2128	4.257	7.81118e-05	0.00471658	1.40059
P4HA3	-2.16719	1.73005	-4.25624	7.8315e-05	0.00471658	1.37741
SLC27A2	1.94354	4.13398	4.2554	7.85365e-05	0.00471658	1.36696
PBLD	1.15428	5.82439	4.25504	7.86326e-05	0.00471658	1.27301
TGFA	0.991833	3.46004	4.25426	7.88417e-05	0.00471658	1.36818
PIP4K2A	-0.600292	5.64239	-4.25394	7.89281e-05	0.00471658	1.24644
RP11-133L19.3	-2.37251	-1.6637	-4.25384	7.89538e-05	0.00471658	1.44699
ITGA9	-0.964447	5.25641	-4.25312	7.91478e-05	0.00471917	1.24874
SNCA-AS1	-1.7126	-3.4235	-4.25155	7.95676e-05	0.00473518	1.37792
CYP2C8	1.88284	0.564114	4.2508	7.97704e-05	0.00473824	1.43484
WISP2	-1.88968	1.61407	-4.25012	7.99555e-05	0.00474024	1.37016
SLC7A8	-1.65009	6.14006	-4.24951	8.01209e-05	0.00474107	1.21172
RP11-923I11.4	1.4277	0.671223	4.24416	8.15846e-05	0.00481844	1.41897
SYT13	2.71586	4.96487	4.24216	8.21385e-05	0.00481844	1.31267
FAM84B	0.975619	6.76081	4.24206	8.21665e-05	0.00481844	1.2035
CACNB3	-0.980692	3.80874	-4.24195	8.21959e-05	0.00481844	1.25984
HOOK1	1.21673	5.33781	4.24195	8.2198e-05	0.00481844	1.24751
ELFN2	3.04483	4.25275	4.24119	8.24077e-05	0.0048217	1.35097
PHYHIPL	2.04095	4.73366	4.23574	8.39411e-05	0.00490226	1.2789
SPTLC3	1.3083	5.17076	4.23493	8.4172e-05	0.00490658	1.23716
MOGAT1	2.7086	0.748387	4.23433	8.43431e-05	0.00490742	1.37829
CIRH1A	0.956046	5.21538	4.23373	8.45137e-05	0.00490823	1.22266
B3GALT1	-1.82192	0.236847	-4.23318	8.46712e-05	0.00490827	1.37023
EGLN2	-0.646235	6.19787	-4.23214	8.49694e-05	0.00491645	1.16379
GPR139	-2.33059	-3.54259	-4.23125	8.52258e-05	0.00492018	1.32694
NANOGP6	2.18818	-0.786667	4.23058	8.54181e-05	0.00492018	1.3352
DPP4	1.36912	5.83462	4.23028	8.55055e-05	0.00492018	1.1975
POLN	-0.74913	1.93071	-4.22826	8.60906e-05	0.00494476	1.31102
RASGEF1A	-1.1717	1.96352	-4.22744	8.63299e-05	0.00494942	1.29724
INPP1	-0.621161	3.68184	-4.22539	8.69302e-05	0.00496761	1.2186
SLC2A9	1.55525	4.1707	4.22459	8.71649e-05	0.00496761	1.25746
BMX	1.54245	0.211422	4.22394	8.7358e-05	0.00496761	1.35136
ACMSD	2.40538	3.64726	4.22376	8.74095e-05	0.00496761	1.30434
GFPT2	-1.09901	3.12217	-4.22366	8.74407e-05	0.00496761	1.23191
STRCP1	-1.9602	-1.95678	-4.22033	8.84276e-05	0.00501458	1.33775
PSG9	-3.11064	0.773457	-4.21953	8.86677e-05	0.00501911	1.2872
RASGRP4	-0.869169	1.97771	-4.21572	8.98154e-05	0.00507489	1.26841
DEPDC7	1.39807	1.04924	4.21374	9.04174e-05	0.00509391	1.32581
RP11-292B8.1	1.33322	2.05584	4.21331	9.05493e-05	0.00509391	1.30479
FARP1	0.692158	9.13998	4.21301	9.06401e-05	0.00509391	1.07255
MYL6	-0.623294	7.81282	-4.21067	9.13571e-05	0.00511785	1.07082
ENPEP	1.22306	5.74507	4.21056	9.13932e-05	0.00511785	1.13427
NKX2-2	-2.99626	-2.11239	-4.20976	9.16403e-05	0.00512253	1.31326
PCDHB7	-1.24231	1.56443	-4.20822	9.21159e-05	0.00513994	1.25369
EFCAB12	1.33115	1.71505	4.20582	9.28659e-05	0.00517257	1.292
RP11-64C12.1	-1.99403	-2.36574	-4.19852	9.51777e-05	0.00529191	1.26391
SH3KBP1	-0.841863	5.34369	-4.19446	9.64876e-05	0.00535523	1.06122
SEPW1	-0.594671	5.74549	-4.19174	9.7375e-05	0.0053939	1.04546
RP11-184M15.1	1.62205	0.617883	4.191	9.76176e-05	0.0053939	1.2574
FBXL7	-0.932095	4.80114	-4.19075	9.77012e-05	0.0053939	1.06328
TIMD4	1.9806	1.44165	4.18898	9.8283e-05	0.00541167	1.25034
MAPK8IP2	-1.49837	1.83892	-4.18872	9.83689e-05	0.00541167	1.17219
AC108938.5	-2.89411	-0.0525486	-4.18731	9.88383e-05	0.00542689	1.22483
SERAC1	0.835139	4.22797	4.18685	9.89922e-05	0.00542689	1.11213
GDI1	-0.565555	6.66503	-4.18525	9.95252e-05	0.00544657	1.00624
ANO4	-1.61369	1.92399	-4.18339	0.000100149	0.00547115	1.15053
CDH10	-2.15259	-2.83258	-4.18164	0.000100742	0.00549316	1.204
ZBBX	2.12575	-0.793127	4.18089	0.000100996	0.00549316	1.19056
RNF157	1.31742	5.25177	4.18065	0.000101079	0.00549316	1.0606
GS1-594A7.5	2.02213	-1.55676	4.17397	0.000103371	0.00560802	1.1495
SHISA9	1.63168	2.54499	4.17249	0.000103888	0.00562632	1.16792
RP11-151A6.4	-1.76045	3.07505	-4.17081	0.000104475	0.0056483	1.05444
UNC13B	0.719557	6.46297	4.17008	0.000104733	0.00565249	0.977509
SLMO1	-0.882788	2.15576	-4.16514	0.000106484	0.00573715	1.09859
CLIC4	1.39905	8.04537	4.16295	0.00010727	0.00576953	0.931862
MYO7B	2.16701	7.25687	4.16204	0.000107596	0.00577113	0.955271
ANKS4B	2.22058	1.64216	4.16165	0.000107737	0.00577113	1.16677
NAPSA	1.51758	3.35055	4.16133	0.000107853	0.00577113	1.09557
SPEF2	1.05816	4.43814	4.15985	0.000108389	0.00578992	1.02399
DCHS1	-0.995975	6.21302	-4.15859	0.000108849	0.00580459	0.925979
AVPR1B	2.32875	1.75338	4.15643	0.000109642	0.00583688	1.15072
CHST7	-0.914238	2.47352	-4.15592	0.000109827	0.00583688	1.05342
RP11-453M23.1	-3.72082	-2.24556	-4.15462	0.000110309	0.00585253	1.14852
NDRG2	-0.677796	6.33899	-4.1506	0.000111806	0.00590874	0.901348
SNX25	-0.713832	4.55566	-4.15035	0.000111899	0.00590874	0.945915
AC000374.1	2.04463	-1.71926	4.15025	0.000111934	0.00590874	1.07594
AP002954.3	0.862233	2.67065	4.14931	0.00011229	0.00591751	1.07317
LCLAT1	0.747201	4.81533	4.14689	0.000113202	0.00594657	0.958936
BRD2	-0.425303	7.50694	-4.14684	0.000113221	0.00594657	0.872557
KIRREL3	-1.41524	1.85553	-4.14625	0.000113448	0.00594851	1.04237
BNC1	-1.71158	2.80319	-4.14377	0.000114393	0.00598802	0.981859
STT3B	-0.691895	7.24062	-4.14092	0.000115489	0.00603533	0.855521
TRIB1	-1.05297	6.51867	-4.14007	0.000115819	0.00604248	0.861051
NAT8	3.19729	5.20141	4.13928	0.000116124	0.00604831	0.993234
CTD-2281E23.3	-1.52545	-3.71456	-4.13475	0.000117898	0.00613051	1.02937
TRIM38	0.811796	6.5833	4.13271	0.000118706	0.0061597	0.857615
HEBP1	-0.6966	5.09154	-4.13234	0.000118853	0.0061597	0.872838
RNF144A	-0.926854	5.38419	-4.12628	0.000121285	0.00626622	0.843136
AGPAT5	0.925905	5.08075	4.12621	0.000121314	0.00626622	0.884751
RP11-426C22.6	-1.52779	-0.40833	-4.12573	0.000121509	0.00626622	1.05743
ARSF	-2.05051	-0.28451	-4.12488	0.000121853	0.00627364	1.047
PDP2	0.811332	4.97358	4.12422	0.000122124	0.00627723	0.87972
LINC00939	2.36252	-0.172211	4.12335	0.00012248	0.00628523	1.03445
PXDNL	-1.86409	1.44548	-4.1225	0.000122827	0.00629273	0.982127
PFKFB2	-1.24045	7.60476	-4.121	0.000123447	0.00631416	0.784805
CCND1	-1.1189	7.787	-4.11906	0.000124249	0.00633349	0.777395
RGS17	1.2563	2.48573	4.11858	0.000124448	0.00633349	0.997393
ABAT	1.27143	5.42285	4.1181	0.000124646	0.00633349	0.853743
AC011242.5	1.18718	0.807885	4.11784	0.000124755	0.00633349	1.03683
RPGRIP1L	0.70743	3.62324	4.11764	0.000124837	0.00633349	0.923829
GLDCP1	1.65537	-0.871067	4.11653	0.000125303	0.00634685	1.00659
SLC16A4	1.12854	5.42823	4.11558	0.0001257	0.00635669	0.843867
Metazoa_SRP	1.72195	-0.572806	4.1147	0.000126071	0.00636514	1.00759
FLYWCH1P1	-1.60249	-3.33286	-4.11349	0.000126582	0.00638066	0.979768
PVALB	-2.67848	1.32693	-4.10775	0.000129027	0.0064846	0.922211
TAGLN3	2.93285	-0.731818	4.10736	0.000129197	0.0064846	0.970431
TFP1	-1.4112	-1.71763	-4.1072	0.000129265	0.0064846	1.00031
GAS2L1	-0.856831	4.87013	-4.10671	0.000129475	0.00648472	0.796738
HELLS	0.861099	3.99541	4.10623	0.000129683	0.00648477	0.871055
CD209	-1.40872	3.07151	-4.10563	0.000129944	0.00648748	0.855102
GLRX5	-0.717163	4.05575	-4.10317	0.000131014	0.00653049	0.816761
MGC16275	-0.839151	0.969367	-4.10148	0.000131752	0.00655683	0.954177
FAM179A	-1.37357	0.849424	-4.09941	0.000132668	0.00659193	0.94343
OSBPL10-AS1	-1.659	0.956717	-4.09727	0.000133615	0.00662843	0.92824
RP1-253B10.1	-2.05925	-3.71553	-4.09244	0.000135785	0.00672058	0.916502
CA13	0.84779	3.34799	4.09162	0.000136154	0.00672058	0.859279
TRPM1	-3.35942	-0.880194	-4.09125	0.000136322	0.00672058	0.945806
CECR6	-1.11554	0.99804	-4.09123	0.000136331	0.00672058	0.918092
AP000432.1	-1.44615	0.841297	-4.08806	0.000137776	0.00678112	0.905621
CCDC148	1.04892	3.32118	4.08556	0.00013893	0.00682719	0.84803
ITM2BP1	1.16012	-0.384982	4.08373	0.000139777	0.00685803	0.92832
BAMBI	-1.26102	4.11336	-4.08288	0.000140174	0.00686532	0.740566
CAND2	-0.836606	3.47585	-4.08247	0.000140364	0.00686532	0.774494
CD14	-1.23236	5.25775	-4.07924	0.000141881	0.00692871	0.694489
FGF13-AS1	-1.55539	-1.96674	-4.07781	0.000142556	0.00695084	0.911135
KIAA1671	0.725886	7.5817	4.07659	0.000143138	0.00696833	0.659819
AC005083.1	1.92816	-0.50171	4.0759	0.000143464	0.00696999	0.894414
FES	-0.86018	3.85094	-4.07558	0.000143617	0.00696999	0.735722
FOLR2	-1.39209	2.72326	-4.07404	0.000144355	0.00697589	0.775125
AC069368.3	-1.66736	-0.694099	-4.07396	0.000144394	0.00697589	0.903115
PTPN13	0.65339	7.07601	4.07393	0.000144407	0.00697589	0.659809
RP11-368J22.2	-1.92208	-2.13288	-4.07309	0.000144809	0.00698452	0.898947
RP11-702C7.1	-2.58122	-3.34005	-4.0692	0.000146693	0.00706449	0.869817
LEPROT	0.732033	7.02276	4.06696	0.000147789	0.00709448	0.640355
DOK2	-1.1694	2.40329	-4.06657	0.000147979	0.00709448	0.772089
RBMXP4	-2.26541	-1.26279	-4.06633	0.000148099	0.00709448	0.884317
C15orf65	1.14521	-0.238991	4.06608	0.000148222	0.00709448	0.880373
CASC2	1.00786	2.96084	4.06484	0.000148832	0.00711281	0.802168
RP13-192B19.2	2.30977	-0.54727	4.06433	0.000149084	0.00711398	0.856373
SH3RF3-AS1	-1.42863	3.50227	-4.0629	0.000149797	0.00713712	0.701323
CTD-2008L17.1	-1.83369	-2.26261	-4.06097	0.000150759	0.00717203	0.861832
COX17	-0.7796	3.21567	-4.05945	0.000151521	0.00719738	0.717606
MAMSTR	-1.00193	1.49193	-4.05875	0.000151874	0.00720321	0.799233
QSOX1	-1.05975	6.5731	-4.0573	0.000152604	0.00722688	0.599472
RP4-529N6.1	-2.22352	-2.18817	-4.05406	0.000154251	0.00729358	0.845085
AGGF1P3	1.34418	0.329639	4.05362	0.000154479	0.00729358	0.847491
CES1	-2.05777	1.63013	-4.05113	0.000155759	0.00734298	0.747178
ZCCHC24	-0.859797	5.69497	-4.04754	0.000157622	0.00741963	0.588345
MS4A4E	-1.16963	2.63083	-4.04338	0.000159812	0.00750692	0.688648
DDX52	0.566386	5.00654	4.0431	0.000159956	0.00750692	0.621265
SMIM2-AS1	1.95348	1.54772	4.04118	0.000160978	0.00754358	0.802746
GS1-594A7.3	1.80112	-2.18989	4.03997	0.000161623	0.00756248	0.752492
APOE	-1.98345	9.36734	-4.038	0.00016268	0.00760057	0.510592
SPATA7	0.69135	3.83394	4.0374	0.000163007	0.00760447	0.662714
LRCH2	-1.31419	2.57526	-4.03592	0.000163805	0.00763034	0.666795
PLEKHH2	1.12145	6.12373	4.03501	0.0001643	0.00764203	0.56885
AP1M2	2.01573	2.37351	4.02897	0.000167615	0.00777962	0.745275
HGFAC	2.37044	0.348731	4.0285	0.000167874	0.00777962	0.767952
SUPT20HL1	-2.37135	-0.921695	-4.02827	0.000168004	0.00777962	0.765481
RAB42	-1.81497	3.70058	-4.0259	0.000169324	0.00782916	0.571814
FAM89A	-0.779681	2.71197	-4.0218	0.000171637	0.00790498	0.629323
LINC01515	1.01249	3.14533	4.02177	0.000171654	0.00790498	0.661015
KATNAL2	-1.02433	3.37714	-4.02125	0.000171949	0.00790498	0.584811
RBBP9	0.637025	4.44755	4.02095	0.000172119	0.00790498	0.578213
DBNDD1	1.41496	3.60965	4.02076	0.000172226	0.00790498	0.646325
TUFT1	0.907503	3.7034	4.01833	0.000173613	0.00795697	0.61533
ATP11AUN	-2.52587	0.783538	-4.01718	0.000174275	0.00796537	0.672123
C1orf167	-1.74334	-2.56064	-4.01685	0.000174462	0.00796537	0.725593
TRIB2	-0.689386	6.05488	-4.01668	0.00017456	0.00796537	0.4861
RP11-813N20.3	2.34468	-0.78112	4.01574	0.000175105	0.0079786	0.712115
ABCC6	1.63432	4.70601	4.01484	0.000175623	0.0079906	0.577556
DOK4	0.812851	5.59	4.01179	0.0001774	0.00805974	0.506339
TINAG	2.92968	2.87402	4.00683	0.000180328	0.00817711	0.681832
FAM181B	-1.35185	1.45221	-4.00653	0.000180506	0.00817711	0.632311
FBXO18	-0.489659	5.82541	-4.00566	0.000181027	0.00818424	0.459926
LINC00877	-1.21789	-0.284283	-4.00539	0.000181186	0.00818424	0.696103
LGALS9	-1.08704	4.99595	-4.00479	0.000181544	0.00818858	0.471407
FAM127A	-0.861109	6.20641	-4.0031	0.000182561	0.0082226	0.4397
SALL1	1.08671	6.05746	4.00206	0.000183187	0.00823894	0.468173
EPDR1	-0.929111	5.63213	-3.99919	0.000184929	0.00828951	0.439164
RP11-70J12.1	1.16661	0.791437	3.99908	0.000184995	0.00828951	0.682375
RAB38	-1.14042	3.72153	-3.9989	0.000185106	0.00828951	0.498711
RP11-157G21.2	-1.43884	-1.07577	-3.99678	0.000186403	0.00833568	0.679685
RPS2P4	1.70861	-0.996969	3.99459	0.000187752	0.00838404	0.653346
ABCA12	2.21706	3.32304	3.99308	0.00018869	0.00840007	0.600467
PCED1B	-0.925868	3.07714	-3.99306	0.000188701	0.00840007	0.515432
SLC28A3	-2.57643	-0.380976	-3.99271	0.000188916	0.00840007	0.645652
LINC00240	1.05962	1.05102	3.99205	0.000189331	0.00840659	0.65466
NIPAL4	-1.58357	1.01248	-3.99147	0.000189687	0.00841046	0.604126
RP11-43D4.2	-1.1373	0.695243	-3.99064	0.000190208	0.00842161	0.625926
DYNC2LI1	0.75299	4.14402	3.98708	0.000192452	0.00850894	0.490724
RP11-862L9.2	-1.12475	2.15348	-3.98623	0.000192989	0.0085192	0.540608
ERBB3	1.88685	5.53575	3.98585	0.000193228	0.0085192	0.457841
TNFRSF21	1.07618	5.85124	3.98468	0.000193975	0.00854007	0.419135
A1BG	-1.19501	1.13912	-3.98243	0.000195416	0.00858163	0.575737
SIN3B	-0.869377	7.34757	-3.98235	0.000195467	0.00858163	0.356002
FAM227A	0.89415	3.45617	3.97845	0.000197991	0.00867213	0.507484
RNF168	-0.447139	5.04932	-3.97742	0.000198663	0.00867213	0.394166
SH3RF3	-1.40617	5.92127	-3.97735	0.000198711	0.00867213	0.360008
ITGB3	1.7439	5.81326	3.97732	0.000198727	0.00867213	0.412904
SLC13A1	3.91016	3.12329	3.97704	0.000198913	0.00867213	0.605634
MGAT3	-1.03756	3.17334	-3.97551	0.000199912	0.00870353	0.454118
SV2C	-2.38824	-0.18619	-3.97225	0.000202068	0.0087852	0.580387
PLEKHH1	1.08235	5.92131	3.97147	0.000202588	0.00879556	0.377345
RP5-1159O4.2	1.41301	0.725959	3.96917	0.000204118	0.00884372	0.597204
RASAL1	2.01918	3.46992	3.96896	0.000204262	0.00884372	0.513682
TIMP3	-1.11588	8.41885	-3.96537	0.000206681	0.00893609	0.291029
CFP	-1.07342	0.99459	-3.96309	0.000208236	0.00898222	0.530092
PDZRN3-AS1	-1.71372	-1.60931	-3.96296	0.000208322	0.00898222	0.581505
PNMA3	1.4564	2.81208	3.9614	0.000209395	0.00901607	0.506524
AC005105.2	1.68572	0.263203	3.9601	0.000210287	0.00904205	0.57303
STON1	-0.909349	5.41166	-3.9596	0.000210636	0.00904463	0.322299
C11orf54	1.21859	5.8763	3.95603	0.000213116	0.00913857	0.334206
DNA2	0.839796	2.86831	3.95418	0.000214411	0.00918152	0.463794
REEP2	-1.24058	0.244508	-3.95356	0.000214847	0.00918762	0.525154
AD000671.6	-2.12405	-1.45464	-3.94976	0.00021754	0.0092901	0.542329
HHATL-AS1	-2.43588	-1.28241	-3.94927	0.000217884	0.00929211	0.537838
GLUL	-0.764652	8.25537	-3.94803	0.000218775	0.00931744	0.240113
CEBPA	-1.13328	4.21118	-3.94737	0.000219245	0.00932478	0.31991
SLC38A10	-0.664002	7.01734	-3.94651	0.000219864	0.0093384	0.251256
RP11-554I8.2	2.22783	-1.39378	3.94521	0.000220802	0.00935467	0.500952
CTC-490G23.2	-1.78577	-3.10182	-3.94515	0.000220845	0.00935467	0.508971
RP4-657E11.10	1.2954	-0.339035	3.94466	0.000221202	0.00935715	0.525204
NDUFB1	-0.638385	4.19382	-3.94048	0.000224247	0.00947316	0.308294
GAPDHP29	2.45016	0.382777	3.93927	0.000225137	0.00948516	0.5102
PITX1	-2.28154	0.448008	-3.93927	0.000225137	0.00948516	0.457169
CTB-49A3.2	-1.91837	-2.56941	-3.93587	0.000227657	0.00957842	0.495277
PNMA1	-0.694552	5.74367	-3.93225	0.000230367	0.00967343	0.232465
HS3ST1	1.71419	3.90789	3.93188	0.000230646	0.00967343	0.370505
IZUMO1	-1.50053	-0.869482	-3.93162	0.000230842	0.00967343	0.485859
DSP	1.16045	6.56085	3.93071	0.000231529	0.00968925	0.234287
VPS13A	0.748068	7.13717	3.92791	0.000233654	0.00976511	0.206516
NEK10	0.883795	1.63356	3.92688	0.000234441	0.00978496	0.44023
TMEM255B	-1.14392	3.87806	-3.92523	0.000235711	0.00981372	0.265079
TRPV4	1.25076	3.91069	3.92517	0.000235757	0.00981372	0.331924
APBB1	-0.692641	5.34949	-3.9239	0.000236737	0.00984142	0.217304
HDAC4	-0.657332	6.1432	-3.92231	0.00023797	0.00987953	0.193552
MASP1	1.64887	5.17792	3.92075	0.000239184	0.00991678	0.265162
DCLK2	-0.798158	5.18278	-3.92017	0.00023964	0.00992225	0.20929
NLGN1-AS1	1.64216	-0.4517	3.91956	0.000240114	0.00992225	0.449085
NTMT1	-0.69144	3.46252	-3.91937	0.000240266	0.00992225	0.27502
FOXD1	-2.54402	0.953224	-3.91855	0.000240908	0.00992751	0.363124
LRRIQ1	1.23596	1.91263	3.9184	0.000241028	0.00992751	0.411609
RP11-736N17.10	1.86971	0.872375	3.91747	0.000241756	0.0099444	0.447738
FBXL21	2.19465	1.52576	3.91585	0.000243042	0.00998416	0.435484
TBCAP2	1.52693	-0.249204	3.91506	0.000243669	0.00999682	0.439856
LINC00621	3.41362	1.10973	3.91368	0.000244766	0.0100107	0.437483
RP11-262H14.5	-1.30552	0.316179	-3.91361	0.000244822	0.0100107	0.402248
RIT1	0.715248	5.23673	3.91304	0.000245279	0.0100107	0.213931
LINC01164	-1.85566	-3.51551	-3.91303	0.000245286	0.0100107	0.410949
NMB	-1.06806	1.02535	-3.91097	0.000246941	0.0100651	0.372861
TMPRSS11D	1.40055	0.90925	3.90965	0.000248008	0.0100954	0.418543
RP11-573N10.1	0.936227	3.32249	3.90831	0.000249089	0.0101209	0.305429
PTRF	-1.06477	7.31797	-3.90796	0.000249376	0.0101209	0.125401
TMEM72-AS1	1.24596	0.824979	3.90762	0.000249648	0.0101209	0.412843
SLC18A3	-3.02137	-1.75951	-3.90709	0.000250085	0.0101209	0.415782
GNA15	-1.15874	1.89671	-3.90688	0.000250249	0.0101209	0.313017
ERVH-1	1.9921	-1.53482	3.90601	0.000250964	0.0101367	0.390287
FZD4	0.842024	7.04964	3.90461	0.000252112	0.0101699	0.137957
RP11-84H6.1	-2.68001	-0.169416	-3.90409	0.000252542	0.0101742	0.37287
HAP1	-2.06485	1.73982	-3.90229	0.000254023	0.0102089	0.285309
PHTF1	-0.489151	4.81598	-3.90206	0.000254214	0.0102089	0.169755
OR4F14P	2.15599	-1.16059	3.90186	0.000254381	0.0102089	0.384676
EPS8L2	1.21214	6.72327	3.90132	0.000254826	0.0102136	0.14036
TTYH2	-0.757227	3.60747	-3.90071	0.000255335	0.0102209	0.210814
IL17RB	1.37534	3.79744	3.89987	0.000256034	0.0102358	0.265328
UNC5B-AS1	-1.96742	0.367929	-3.89899	0.000256767	0.010252	0.345105
MB21D2	0.888841	2.71853	3.89681	0.0002586	0.010312	0.302227
CTD-2396E7.9	-1.7082	-2.55035	-3.89592	0.000259347	0.0103287	0.379806
AL592528.1	-1.39176	-0.512489	-3.89532	0.000259853	0.0103357	0.374512
CTD-2553C6.1	-1.5256	-0.810187	-3.8945	0.000260545	0.0103364	0.376042
NRG1	1.70117	6.17506	3.89449	0.000260558	0.0103364	0.144643
HSPB7	-1.47613	3.87511	-3.89365	0.000261265	0.0103364	0.163577
DYNLL1-AS1	0.705016	3.08338	3.89337	0.000261509	0.0103364	0.264344
ACTL10	-0.789274	2.10611	-3.89335	0.000261523	0.0103364	0.270501
SNX21	-0.631118	4.99466	-3.89095	0.000263571	0.0103952	0.127414
CTC-774J1.1	1.91917	-0.464332	3.89083	0.000263674	0.0103952	0.36569
CLCN5	1.16581	7.02191	3.88853	0.000265654	0.0104492	0.0940937
IL17RA	-0.59123	5.65346	-3.88847	0.000265712	0.0104492	0.101844
PLEKHA6	0.917706	7.55036	3.88792	0.000266185	0.0104547	0.0774889
PSG4	-2.81404	1.84021	-3.8861	0.000267761	0.0105034	0.214899
MIPEP	-0.84668	4.40844	-3.88494	0.000268777	0.0105301	0.126285
ALDH8A1	2.21619	4.13378	3.88295	0.000270516	0.0105837	0.228709
RP11-678G14.4	1.46157	-0.970369	3.88261	0.000270822	0.0105837	0.338929
SERPINB6	-0.520378	6.96042	-3.88199	0.000271364	0.010586	0.0555209
C10orf53	-1.88301	-1.99058	-3.88177	0.000271556	0.010586	0.346738
CUX1	0.61736	8.02307	3.88109	0.000272155	0.0105945	0.0461582
RCN3	-0.981418	3.97574	-3.88061	0.000272588	0.0105945	0.128108
POLR1C	0.488854	3.6202	3.88038	0.00027279	0.0105945	0.18833
VSTM5	1.12274	0.250149	3.8785	0.00027446	0.0106441	0.335865
EPN2	-0.52849	5.67564	-3.87818	0.000274747	0.0106441	0.0711935
RP11-115D19.2	-1.67994	-1.46852	-3.87617	0.000276542	0.0107004	0.330469
HTRA1	-0.957988	5.91172	-3.87494	0.000277651	0.0107186	0.0503085
RP11-84O12.3	1.95691	-2.42854	3.87488	0.000277699	0.0107186	0.286855
MAP3K1	0.609586	6.32629	3.87216	0.000280162	0.0108004	0.0525295
RP11-2B6.3	-1.15869	-0.496855	-3.86956	0.000282541	0.0108787	0.301191
RP11-76H14.2	-1.96572	-2.73663	-3.86853	0.000283482	0.0109015	0.302274
FUT10	0.562148	4.1644	3.86786	0.000284098	0.0109118	0.12082
TMEM26-AS1	-1.6584	-1.37787	-3.86605	0.000285773	0.0109608	0.300569
FIGNL2	1.23353	3.9952	3.86541	0.000286363	0.0109608	0.145168
SUPT3H	0.709043	2.92715	3.86535	0.000286425	0.0109608	0.190794
ZNF587P1	-1.54983	1.93897	-3.85993	0.000291502	0.0111415	0.162959
DNAJC12	1.68335	0.457083	3.85931	0.000292083	0.011145	0.282025
RNF10	-0.471225	7.06359	-3.85908	0.000292304	0.011145	-0.0158049
RP11-1C1.4	3.95658	0.0437711	3.8559	0.000295327	0.0112465	0.260963
NR1I2	1.21916	-0.323584	3.85423	0.000296926	0.0112936	0.267828
CDK16	-0.740961	6.597	-3.852	0.000299076	0.011349	-0.0315614
GAPDHS	-1.68115	-3.55877	-3.85197	0.000299106	0.011349	0.238765
RP11-67H2.1	-2.15919	-3.38438	-3.85155	0.000299514	0.0113507	0.245518
FLJ35934	-1.70253	0.909852	-3.85093	0.000300121	0.0113599	0.181602
AP001258.4	0.659831	2.13882	3.84903	0.000301968	0.0114161	0.179894
RGS20	-1.92183	1.9194	-3.84789	0.000303081	0.0114443	0.111009
KRT8P42	-1.87474	-1.66878	-3.84698	0.000303981	0.0114645	0.246936
ANKRA2	-0.454781	3.42228	-3.8456	0.000305341	0.0115019	0.0610272
SOX9	1.83091	4.69618	3.84459	0.000306334	0.0115255	0.0660682
PPM1E	-1.22034	2.15568	-3.8433	0.000307615	0.0115598	0.105663
CTC-231O11.1	-1.14553	2.1893	-3.84102	0.00030989	0.0116313	0.100456
AKAP3	-1.68773	0.858724	-3.83941	0.000311512	0.0116782	0.153513
MME-AS1	2.28094	-0.919364	3.83675	0.0003142	0.0117648	0.205833
COLEC12	-1.26795	3.40052	-3.83412	0.000316883	0.0118511	0.00864559
TCERG1L	-2.90011	-0.727842	-3.83357	0.000317447	0.011858	0.179545
AC074363.1	-1.76888	-2.69587	-3.83092	0.000320169	0.0119455	0.195786
RNF144A-AS1	-1.57392	0.871433	-3.82921	0.000321946	0.0119899	0.126648
ZNF69	0.649583	3.81246	3.82903	0.000322127	0.0119899	0.0278958
UBAC1	-0.550231	4.59446	-3.82847	0.00032271	0.0119974	-0.0464525
CRYZ	1.17258	6.04949	3.82749	0.000323735	0.0120005	-0.064941
OSBPL11	-0.539686	4.87016	-3.82746	0.000323768	0.0120005	-0.0599052
PEBP4	-2.10975	-1.80563	-3.82715	0.000324089	0.0120005	0.189523
JUP	0.791032	7.0836	3.82662	0.000324647	0.0120005	-0.101416
CHCHD6	-0.818762	2.23753	-3.82656	0.00032471	0.0120005	0.0614831
PYCARD-AS1	-2.41411	-2.66224	-3.82607	0.00032522	0.0120052	0.187349
RPS6KA1	1.0123	5.19591	3.8251	0.000326241	0.0120219	-0.0451272
MFI2	-2.15358	3.85852	-3.82491	0.000326443	0.0120219	-0.0542488
AC100830.3	-0.997948	1.20766	-3.82038	0.000331241	0.0121772	0.0980215
NXNL2	1.61677	2.0289	3.81978	0.000331881	0.0121772	0.124857
RP11-67L3.5	1.73212	-1.84838	3.81955	0.000332127	0.0121772	0.14741
LIPC	2.05488	4.25997	3.81905	0.000332667	0.0121772	0.0223917
DCAF15	-0.756055	4.1161	-3.81901	0.000332712	0.0121772	-0.060648
RP11-429J17.7	1.60369	-1.44545	3.81841	0.000333355	0.0121772	0.151806
RGAG4	-0.944756	4.84506	-3.81808	0.000333704	0.0121772	-0.0929886
MMAA	0.69258	3.92876	3.81802	0.000333771	0.0121772	-0.011501
FBXL13	0.790694	1.15384	3.81646	0.00033545	0.0122242	0.130976
PYCARD	-1.37805	2.56886	-3.81595	0.000336011	0.0122304	-0.00266211
CDH20	-1.75406	0.741712	-3.81466	0.000337409	0.0122599	0.0855211
DCT	-2.48443	0.480905	-3.81432	0.000337773	0.0122599	0.0807035
WTAPP1	1.49383	0.206269	3.81412	0.000337996	0.0122599	0.153537
AC013268.3	-2.08991	-1.82164	-3.81249	0.000339772	0.0123101	0.14866
PLEKHA1	0.758551	6.75035	3.81211	0.000340183	0.0123107	-0.137303
NIPSNAP1	0.814659	5.573	3.80771	0.000345038	0.0124672	-0.116038
ASB18	2.50821	-0.578212	3.8074	0.000345383	0.0124672	0.127307
ATP2A3	-1.30055	5.28519	-3.80686	0.000345983	0.0124672	-0.145195
TSPYL2	-0.891075	4.78876	-3.80673	0.000346133	0.0124672	-0.125597
MNS1	1.01148	1.92217	3.8064	0.000346499	0.0124672	0.0744215
PPP2R3A	0.893914	6.3203	3.80589	0.000347068	0.0124733	-0.142686
BMS1P17	-1.83216	-1.13936	-3.80553	0.000347471	0.0124735	0.122825
AC027612.6	0.960849	3.75058	3.80494	0.000348134	0.012481	-0.0295762
CTAGE14P	-1.57567	-1.54272	-3.80434	0.000348807	0.012481	0.125936
TRAF4	0.666161	4.96581	3.80427	0.000348877	0.012481	-0.107288
MARCKS	-0.787273	6.92949	-3.8039	0.000349297	0.0124818	-0.18342
ZNF823	0.873988	2.76513	3.803	0.000350307	0.0125036	0.0198802
MERTK	-0.537487	4.94689	-3.80179	0.00035168	0.0125162	-0.138856
SFRP4	-1.52246	4.85895	-3.80166	0.000351826	0.0125162	-0.150957
PRG4	-2.08692	-0.0921809	-3.80142	0.000352098	0.0125162	0.0792799
NPM2	1.90037	1.58074	3.80128	0.000352258	0.0125162	0.0925716
COLEC10	1.94766	-0.47315	3.79866	0.000355238	0.012596	0.106955
ATP2B2	-2.0195	2.54495	-3.79859	0.000355311	0.012596	-0.0695559
SLC44A3	1.18153	4.79699	3.79693	0.000357214	0.0126492	-0.105427
RP11-710C12.1	-1.26653	-0.0797899	-3.79467	0.000359818	0.0127198	0.072262
FNBP1	-0.605066	6.40025	-3.79423	0.000360327	0.0127198	-0.200861
ATP2A2	-0.559921	8.16571	-3.79414	0.000360429	0.0127198	-0.227812
GJB1	1.84715	2.29887	3.79376	0.000360867	0.012721	0.0438615
NLGN1	1.44876	3.88384	3.79129	0.000363746	0.012808	-0.062692
LMO7	0.791194	6.41251	3.7909	0.000364204	0.0128098	-0.1929
RP1-63M2.7	-1.07062	0.286571	-3.79014	0.000365088	0.0128264	0.0472567
UBA6-AS1	0.570589	3.45726	3.78952	0.000365817	0.0128376	-0.073194
ZNF888	0.81101	3.81348	3.78881	0.000366655	0.0128526	-0.0856633
ANKRD9	-1.08237	5.82254	-3.78842	0.000367118	0.0128545	-0.21082
LINC00628	1.15581	0.282504	3.78735	0.000368373	0.012884	0.0742151
SP5	-1.36779	-1.00047	-3.78567	0.000370367	0.0129258	0.0679527
FGF14	-1.55616	3.1109	-3.78554	0.000370527	0.0129258	-0.124456
GALNT12	-0.802363	3.34889	-3.7853	0.000370808	0.0129258	-0.12373
NDST4	-1.84346	-3.61726	-3.78398	0.000372379	0.0129662	0.0522533
RP11-242J7.1	-2.83897	0.363883	-3.7808	0.000376202	0.0130714	-0.0181302
RP11-234K24.3	0.872937	3.19149	3.78063	0.000376404	0.0130714	-0.072681
SNAP25	1.92587	1.29218	3.78042	0.000376654	0.0130714	0.0427894
EMC9	-0.627982	2.45176	-3.77902	0.000378357	0.013116	-0.0865612
DNAJC28	0.884254	1.05071	3.77813	0.000379438	0.0131295	0.0241916
STAT1	1.0778	7.35562	3.77801	0.000379587	0.0131295	-0.249755
RP11-119N19.1	-1.67418	-2.86798	-3.77568	0.000382431	0.0132133	0.0380316
FGF13	-1.09674	3.05701	-3.77506	0.000383187	0.0132248	-0.146676
PRKAG2-AS1	-1.24933	0.526829	-3.77403	0.00038445	0.0132538	-0.013683
MKRN3	-1.63508	-2.54182	-3.77212	0.000386815	0.013306	0.0325183
SHROOM4	0.636523	5.60759	3.77189	0.000387094	0.013306	-0.228518
GRHL1	0.873364	2.73981	3.7713	0.000387829	0.013306	-0.0738055
LGR4	0.833583	6.27785	3.77123	0.000387914	0.013306	-0.247434
EPB41L1	0.877412	6.74624	3.77109	0.000388089	0.013306	-0.260327
SLC39A1	1.03317	6.94918	3.77045	0.000388889	0.0133188	-0.26393
KB-1552D7.2	2.41444	1.7521	3.76788	0.000392106	0.0134006	0.00311494
BASP1	-1.25474	3.43036	-3.76777	0.000392243	0.0134006	-0.193378
AC005281.2	1.69151	0.0271797	3.76752	0.000392561	0.0134006	0.0230839
CTH	1.03481	1.29447	3.76714	0.000393034	0.0134021	-0.0138668
EPHB1	-1.70415	4.85983	-3.76631	0.000394082	0.0134232	-0.2591
SLC22A24	1.99159	0.450921	3.76069	0.000401227	0.0136518	0.00299523
TULP1	-1.83835	-1.35896	-3.75998	0.000402144	0.0136681	-0.00338454
RP11-444E17.6	-1.43017	0.713658	-3.75937	0.000402927	0.0136799	-0.0681039
ST6GALNAC1	-1.25826	-1.93427	-3.75873	0.000403748	0.0136929	-0.00184827
RP11-401N18.1	-1.67258	-3.63992	-3.75831	0.000404295	0.0136966	-0.0195257
RP11-358L22.3	1.03215	0.0532382	3.75738	0.000405503	0.0137227	-0.00807164
C1QTNF1	-0.866031	4.52463	-3.75692	0.000406096	0.0137279	-0.264749
RP11-424C20.2	-1.34992	0.193827	-3.75345	0.000410622	0.0138659	-0.0616117
TXNL4B	0.445996	3.10845	3.75236	0.000412058	0.0138994	-0.164713
CCDC67	1.41658	-1.65348	3.75106	0.00041377	0.0139386	-0.0350267
SUPT20HL2	-2.36845	-1.26094	-3.7508	0.000414112	0.0139386	-0.0378361
SLC25A37	0.683195	6.14091	3.75042	0.000414626	0.013941	-0.30812
SRRM3	-1.44964	1.77611	-3.74914	0.00041632	0.0139824	-0.156695
LCA5L	0.768697	1.84534	3.74881	0.000416753	0.0139824	-0.0965359
PHKA1	-1.05935	4.31231	-3.74804	0.000417784	0.0139982	-0.287109
SMIM2	1.90752	-0.998325	3.74779	0.000418117	0.0139982	-0.0388514
PYGM	-1.09228	1.63351	-3.74538	0.000421345	0.0140607	-0.149217
RP11-757O6.6	-2.14071	-0.733858	-3.7453	0.000421461	0.0140607	-0.0637127
C1QA	-1.29599	5.30954	-3.74458	0.000422424	0.0140607	-0.333144
MCU	0.479504	4.53482	3.74425	0.000422867	0.0140607	-0.271976
RNASE1	-1.24542	4.9742	-3.74423	0.000422897	0.0140607	-0.323186
HOXA-AS2	0.872856	4.93838	3.74407	0.000423114	0.0140607	-0.279627
RP11-596D21.1	-1.25628	-1.36195	-3.74406	0.000423129	0.0140607	-0.0446749
HTR2A	-1.77566	-0.246388	-3.74343	0.000423982	0.0140741	-0.0771162
MOB3B	0.873556	4.97023	3.74252	0.000425214	0.0141001	-0.285431
RP11-58O15.1	-1.92041	-3.51745	-3.74032	0.000428211	0.0141844	-0.0649474
LHFP	-1.0294	5.52688	-3.73959	0.000429211	0.0142025	-0.35
ACOT12	2.17885	1.04715	3.73556	0.000434758	0.0143709	-0.0742707
ABCB5	-3.59219	4.95397	-3.73469	0.000435959	0.0143954	-0.371634
XXyac-YM21GA2.1	-1.53833	-3.68569	-3.73381	0.000437186	0.0144207	-0.0876624
TMSB4XP6	-0.991558	1.22942	-3.73336	0.000437816	0.0144263	-0.159836
FRAS1	1.17636	6.71675	3.73108	0.000441008	0.0145162	-0.37306
IFIT5	0.669872	4.70603	3.73028	0.000442134	0.0145379	-0.315664
LA16c-313F4.1	0.714987	0.431058	3.7297	0.000442954	0.0145496	-0.0993505
IGSF10	-1.37563	2.05689	-3.72747	0.000446109	0.0146379	-0.230687
PARD3	0.671867	6.24872	3.72668	0.000447233	0.0146593	-0.382487
HHAT	-0.944149	5.30534	-3.72635	0.000447699	0.0146593	-0.382072
TUBB4A	-1.57781	6.41296	-3.724	0.000451064	0.0147541	-0.421013
PCBP3	-1.46616	0.930234	-3.72128	0.000454988	0.0148669	-0.191176
RP11-674I16.1	0.870513	0.788561	3.7209	0.000455539	0.0148694	-0.131295
RP5-1027G4.3	-1.63839	-0.601342	-3.71626	0.000462315	0.0150748	-0.141695
CREB5	0.6954	6.40864	3.71568	0.000463163	0.0150828	-0.41919
CSF1R	-0.927115	6.22012	-3.71544	0.000463522	0.0150828	-0.436663
TSHZ1	-0.698231	6.38153	-3.71463	0.000464714	0.0151058	-0.439822
AC007163.6	-1.52157	-1.67639	-3.71411	0.000465486	0.0151152	-0.127537
ENO3	-1.30134	4.04002	-3.7106	0.000470705	0.0152689	-0.391687
ZNF33B	1.00309	5.58856	3.7099	0.000471749	0.0152859	-0.404742
OR2L1P	-1.97142	-2.53289	-3.7096	0.000472206	0.0152859	-0.138705
PSG5	-2.82271	0.876515	-3.70815	0.000474383	0.0153255	-0.260297
AC027612.4	1.69818	0.290124	3.70786	0.000474818	0.0153255	-0.145946
EEF1E1	1.16773	2.74251	3.70781	0.000474897	0.0153255	-0.247162
FGF10	-1.77593	-0.621006	-3.70718	0.000475838	0.01534	-0.168726
LY6E	-1.02032	5.11813	-3.70651	0.000476862	0.0153572	-0.436909
SFXN2	0.830941	4.92336	3.70571	0.000478074	0.0153653	-0.39293
RP11-17P16.1	1.09161	-0.783808	3.7054	0.000478536	0.0153653	-0.150654
PRAF2	-0.50246	3.39648	-3.70537	0.000478585	0.0153653	-0.355406
LRFN1	-0.949352	1.32259	-3.70479	0.000479473	0.015378	-0.248529
LINC00865	-1.27059	1.89618	-3.70124	0.000484907	0.015508	-0.297303
MTMR10	0.577298	6.84265	3.70117	0.000485009	0.015508	-0.474398
ALMS1P	1.23267	1.73424	3.70117	0.000485013	0.015508	-0.218992
PTER	1.01174	4.10604	3.69753	0.000490638	0.0156719	-0.364007
AMZ2	-0.567406	5.31565	-3.69696	0.000491525	0.0156769	-0.463811
RP11-100G15.7	1.86802	-1.99241	3.69677	0.000491832	0.0156769	-0.189769
RP11-259P15.4	-1.58914	-1.89013	-3.69645	0.00049233	0.0156769	-0.175156
AC016712.1	2.36285	-0.191589	3.69615	0.000492798	0.0156769	-0.176516
TCTEX1D2	-1.06676	1.88403	-3.69484	0.000494845	0.015726	-0.312209
ATP11A-AS1	-0.958702	3.23108	-3.69426	0.000495756	0.015739	-0.391207
IGFBP4	-0.859677	7.94768	-3.69271	0.000498206	0.0157981	-0.530803
ABCC2	2.07482	5.0652	3.69244	0.000498626	0.0157981	-0.400391
RP4-798P15.3	0.947986	4.24833	3.69208	0.000499189	0.0157999	-0.395408
RP11-478K15.6	2.07103	0.974437	3.6917	0.000499802	0.0158033	-0.198792
UBAP2	0.413047	5.53277	3.68888	0.000504275	0.0159259	-0.476761
FAM150B	-1.81162	1.26756	-3.68862	0.000504695	0.0159259	-0.316074
SEMA4A	-1.53015	4.55805	-3.68804	0.00050563	0.0159393	-0.480742
VAV3	0.881601	5.6476	3.68735	0.00050673	0.0159579	-0.476384
C20orf166-AS1	-1.5644	-0.386037	-3.68629	0.000508429	0.0159893	-0.233513
RAI14	0.865976	5.995	3.6861	0.000508747	0.0159893	-0.492483
SIGLEC1	-1.18804	5.35244	-3.68499	0.000510532	0.0160293	-0.509379
COL5A3	-1.30944	4.43387	-3.68261	0.000514396	0.0161344	-0.489122
TMEM132C	-1.75207	-0.253564	-3.68195	0.000515478	0.0161522	-0.254294
RP11-111K18.2	1.32433	0.0813555	3.68087	0.000517241	0.0161912	-0.221537
CLDN2	2.37173	5.239	3.67928	0.000519845	0.0162564	-0.434927
XKR9	1.51985	-0.719008	3.67799	0.000521973	0.0163067	-0.226604
GM2AP1	-1.83103	-3.59447	-3.67629	0.000524778	0.0163637	-0.239985
ELOVL7	1.19052	5.32886	3.67617	0.000524986	0.0163637	-0.487383
SLC3A1	1.62958	7.25031	3.67594	0.000525365	0.0163637	-0.542521
C1QC	-1.23785	5.79432	-3.67212	0.000531746	0.016546	-0.55945
MYO6	0.767543	7.11994	3.67173	0.000532397	0.0165498	-0.565803
RAB35	-0.441006	5.41989	-3.67108	0.000533498	0.0165601	-0.541879
RP11-351J23.2	-1.72204	-1.47163	-3.67065	0.000534216	0.0165601	-0.251476
C6orf1	-0.633681	3.91951	-3.6706	0.000534315	0.0165601	-0.489831
LINC00524	-1.56327	-3.59211	-3.66987	0.000535537	0.0165815	-0.259009
RP11-529E15.1	1.87135	0.541103	3.66924	0.000536612	0.0165895	-0.255048
CTD-2336O2.1	-0.718854	3.31421	-3.6691	0.000536855	0.0165895	-0.463136
GLRB	1.22067	2.2227	3.66854	0.000537793	0.0165906	-0.333556
OR4F28P	2.33238	-1.55422	3.66831	0.000538196	0.0165906	-0.263174
KRT75	-2.54631	-2.89383	-3.66814	0.000538481	0.0165906	-0.252849
ZNF487	0.53773	2.65465	3.6677	0.00053923	0.0165974	-0.383275
ACSM2B	2.68991	7.26553	3.6667	0.000540939	0.0166247	-0.55177
PMP22	-1.32159	5.29364	-3.66654	0.000541201	0.0166247	-0.564018
TUBB4BP5	1.99323	-1.64073	3.66592	0.000542267	0.0166247	-0.269239
RP5-1184F4.7	-1.36101	0.0304999	-3.66589	0.00054231	0.0166247	-0.305807
RP11-528M18.2	2.26935	0.430738	3.66562	0.000542775	0.0166247	-0.260822
FCAMR	2.92761	3.3677	3.66491	0.000543993	0.0166458	-0.34644
MORN4	0.621849	3.52289	3.66428	0.000545084	0.0166629	-0.444545
OLFM1	-1.39059	1.6183	-3.66228	0.000548526	0.0167517	-0.398415
ZFPM1	-1.01249	4.14731	-3.66069	0.0005513	0.0167944	-0.536642
MSRB1	1.30283	4.37351	3.66064	0.000551378	0.0167944	-0.481925
FZD1	1.22145	6.79987	3.66055	0.000551534	0.0167944	-0.584189
NXF1	-0.435817	6.61143	-3.65871	0.000554743	0.0168757	-0.607919
PLEKHG3	0.77032	7.8431	3.6582	0.000555649	0.0168786	-0.61929
GLCCI1	-0.620054	4.77308	-3.65804	0.000555917	0.0168786	-0.562152
HNF4A	2.36282	5.03684	3.65704	0.000557679	0.0169157	-0.487783
DPYS	2.35386	4.46911	3.65601	0.000559496	0.0169544	-0.460048
PDE4A	-0.798468	5.40329	-3.65562	0.000560175	0.0169586	-0.592129
SNHG10	-0.582291	2.30895	-3.65504	0.000561199	0.0169732	-0.438144
TMEM189	-0.465547	4.66606	-3.65388	0.000563264	0.0170092	-0.566882
ACO1	-1.0277	6.87618	-3.65363	0.000563715	0.0170092	-0.633229
MAATS1	1.10029	3.44992	3.65316	0.000564539	0.0170092	-0.454264
FSTL4	-1.38309	2.90782	-3.65315	0.000564563	0.0170092	-0.504749
SPI1	-0.813804	4.518	-3.65159	0.000567347	0.0170519	-0.575668
ZNF860	-1.75746	2.5369	-3.65146	0.000567571	0.0170519	-0.496128
CSPP1	0.564138	4.61687	3.65144	0.000567615	0.0170519	-0.546845
SLC5A8	3.10432	3.43028	3.65068	0.00056898	0.0170537	-0.387396
GPR125	0.560976	5.72902	3.65059	0.000569126	0.0170537	-0.594019
NRSN1	2.15468	0.685858	3.65049	0.000569311	0.0170537	-0.307737
RP11-29G8.3	0.889944	3.9776	3.64993	0.000570321	0.0170677	-0.503971
VENTXP1	-3.06261	-2.68928	-3.6495	0.000571096	0.0170745	-0.306403
PI16	-1.90677	0.238547	-3.64901	0.00057197	0.0170843	-0.37493
RP11-1070A24.1	-1.85479	-2.24843	-3.64863	0.00057266	0.0170886	-0.306572
CSNK2A1	0.468621	7.38045	3.64639	0.000576709	0.0171931	-0.648586
RSPO3	-1.55934	1.50312	-3.64353	0.000581935	0.0172922	-0.447939
EFCAB6	0.845097	2.99189	3.6434	0.000582167	0.0172922	-0.46131
HSPA8P16	-1.9635	-1.74374	-3.6434	0.000582173	0.0172922	-0.325836
RP11-124N2.1	-1.34017	-1.5215	-3.64309	0.000582747	0.0172922	-0.325544
RP11-6B4.1	2.04438	-0.936579	3.64281	0.000583245	0.0172922	-0.324877
FAM178B	-1.56739	-2.06118	-3.64276	0.00058335	0.0172922	-0.322794
CATSPER2P1	-0.599873	2.37161	-3.64187	0.000584983	0.0173191	-0.480959
SCN8A	1.07556	3.14237	3.64158	0.000585516	0.0173191	-0.46777
FXYD2	1.65659	7.86614	3.64136	0.000585916	0.0173191	-0.658378
TFE3	-0.663455	6.3706	-3.64071	0.000587116	0.0173346	-0.658281
ZNF597	0.641861	2.66248	3.64048	0.000587548	0.0173346	-0.457528
ADM2	1.26008	6.59852	3.63964	0.000589093	0.0173638	-0.638625
GAPDHP70	0.866637	-0.0856324	3.63525	0.000597292	0.0175889	-0.349536
RHOBTB3	-0.707029	6.25314	-3.63427	0.000599124	0.0176263	-0.674679
HECTD1	-0.534785	7.93711	-3.63385	0.000599927	0.0176301	-0.702752
WDR19	0.68069	5.26371	3.63349	0.000600604	0.0176301	-0.625565
KCNK1	-1.20649	2.85034	-3.63331	0.000600943	0.0176301	-0.554913
B3GALNT1	0.537549	4.49729	3.63208	0.000603272	0.0176758	-0.599074
TSGA10	0.755417	3.51513	3.63172	0.000603952	0.0176758	-0.531233
KIF24	0.742617	2.65177	3.63141	0.000604549	0.0176758	-0.47956
RP11-362F19.2	1.2105	1.94662	3.63084	0.000605636	0.0176758	-0.426659
GNAI2	-0.51889	7.10209	-3.63083	0.00060565	0.0176758	-0.699503
C20orf144	-0.730658	2.08825	-3.63061	0.000606069	0.0176758	-0.499997
MGST1	1.75734	4.77718	3.63023	0.000606794	0.0176758	-0.571801
YWHAEP5	-1.29365	-0.410293	-3.62982	0.000607568	0.0176758	-0.387566
RPS10P28	-2.67276	0.671167	-3.62972	0.000607762	0.0176758	-0.472365
OSR2	-1.27032	0.751188	-3.62926	0.000608634	0.0176758	-0.443149
RAB4B	-0.547664	3.91518	-3.62921	0.000608739	0.0176758	-0.607976
LINC00330	-1.86377	-3.01649	-3.62893	0.000609277	0.0176758	-0.362449
PTPLA	-0.966464	2.08247	-3.62727	0.000612453	0.0177515	-0.515662
TOX3	1.82999	3.03698	3.62641	0.000614121	0.0177834	-0.481356
CMTM3	-0.614148	4.87754	-3.62469	0.000617442	0.0178463	-0.663236
LINC00304	-1.53416	-0.315632	-3.62465	0.000617519	0.0178463	-0.412668
RP11-50D9.3	0.742532	1.44627	3.6244	0.000618004	0.0178463	-0.434073
DNAH14	0.733725	4.33074	3.62345	0.000619841	0.0178828	-0.606173
RP11-702C7.2	-2.54677	-3.21458	-3.62155	0.000623555	0.0179712	-0.380687
BPHL	0.67575	4.68659	3.6213	0.000624053	0.0179712	-0.635299
RP13-93L13.2	0.731742	2.70219	3.62007	0.000626451	0.0180237	-0.516172
SLITRK4	1.45733	4.07215	3.61825	0.000630049	0.0180839	-0.579483
TUBA8	-1.52146	2.31511	-3.61822	0.00063011	0.0180839	-0.57467
AP001627.1	0.955669	1.11059	3.61791	0.000630712	0.0180839	-0.434505
AC007349.4	2.0518	-1.99771	3.61784	0.000630855	0.0180839	-0.401947
SPATA17	1.1765	0.277398	3.61707	0.000632386	0.0181042	-0.403354
CFAP221	1.15746	3.01047	3.6169	0.000632719	0.0181042	-0.526416
KIAA1731NL	-0.915996	3.2533	-3.61648	0.00063355	0.0181114	-0.619288
TTC39A-AS1	1.52563	-1.12186	3.61611	0.000634298	0.0181163	-0.396633
RP11-343C2.11	-2.77492	-2.77388	-3.61135	0.000643819	0.0183714	-0.408688
AC084290.2	1.43933	-0.0464541	3.61084	0.000644846	0.018384	-0.411984
IFNWP19	2.0084	-2.17894	3.60873	0.000649131	0.0184864	-0.427899
GRID1	2.37209	3.87865	3.60849	0.000649621	0.0184864	-0.562798
CTD-2373H9.5	-0.753654	2.3845	-3.60717	0.000652309	0.0185396	-0.588016
MFI2-AS1	-1.18854	0.51029	-3.60699	0.000652672	0.0185396	-0.494007
RP11-1223D19.1	-2.1994	-1.13422	-3.60667	0.000653339	0.0185417	-0.44383
RP11-408H1.3	1.2371	0.484058	3.60512	0.000656515	0.0186071	-0.44074
ANKRD34A	-0.704714	1.2962	-3.60496	0.000656832	0.0186071	-0.525499
CEACAMP10	-2.17772	-1.95839	-3.60446	0.000657868	0.0186081	-0.43253
RXRG	-1.47918	-1.85441	-3.60437	0.000658059	0.0186081	-0.428943
SHANK2	1.06266	5.67476	3.60373	0.000659385	0.0186165	-0.718993
PLEKHO1	-0.816334	5.1586	-3.60345	0.000659964	0.0186165	-0.737852
AC073283.4	1.22684	0.634894	3.60307	0.000660733	0.0186165	-0.451029
C3orf67	0.93933	1.94379	3.60307	0.000660733	0.0186165	-0.515691
FEZF1-AS1	-2.67751	-2.55083	-3.60129	0.000664434	0.0187039	-0.437898
AGBL4	1.33385	1.01442	3.60017	0.000666774	0.0187487	-0.471429
HNRNPA0	-0.494732	6.50232	-3.59995	0.000667223	0.0187487	-0.778413
SLC7A5	-1.07957	6.83657	-3.59886	0.000669508	0.0187961	-0.793434
CD58	0.731699	2.95297	3.59646	0.000674536	0.0189202	-0.599393
ZNF277	0.609273	3.76243	3.59417	0.000679396	0.019031	-0.661917
ASS1	1.24237	5.43396	3.59403	0.0006797	0.019031	-0.733316
SLC35D2	0.510707	3.98777	3.59173	0.000684604	0.0191512	-0.690573
NPBWR1	-2.71127	-1.43196	-3.5911	0.000685939	0.0191714	-0.487237
GATA6	-1.05655	3.47431	-3.58899	0.000690476	0.019281	-0.715708
ADAP2	-0.68219	4.8847	-3.5884	0.00069176	0.0192996	-0.770431
AC023590.1	0.974217	2.67162	3.58768	0.000693313	0.0193165	-0.599162
FAM132B	2.28209	2.894	3.58749	0.000693711	0.0193165	-0.566583
EBI3	-0.946138	0.999883	-3.58726	0.000694216	0.0193165	-0.567038
ABCB4	1.67802	2.0232	3.58608	0.000696786	0.0193708	-0.542636
QRFPR	1.95083	0.119408	3.58509	0.000698936	0.0194133	-0.481709
CDK8	-0.563173	4.33136	-3.58469	0.000699812	0.0194204	-0.758628
PRKAB1	0.547471	5.8894	3.58374	0.000701882	0.0194552	-0.793993
EMX2OS	1.5127	6.40727	3.58355	0.000702309	0.0194552	-0.791328
ZBTB44	0.685449	7.24002	3.58314	0.0007032	0.0194626	-0.8289
GABRG2	-1.50347	-2.78502	-3.58148	0.000706856	0.0195345	-0.489856
RP11-162A12.2	-1.04477	0.00677273	-3.5814	0.000707044	0.0195345	-0.537633
NMT2	0.542504	4.67668	3.57983	0.000710504	0.0196128	-0.757888
ACY3	1.48703	2.24577	3.57894	0.000712476	0.0196499	-0.583027
FAM204CP	1.13551	-0.390274	3.57684	0.000717161	0.0197617	-0.503333
RP11-302M6.4	-2.2748	-2.55693	-3.57509	0.000721098	0.0198266	-0.507116
HMGB3	0.885833	3.8496	3.57471	0.000721945	0.0198266	-0.714703
XYLB	0.846696	4.47302	3.57425	0.00072297	0.0198266	-0.75422
TPST2	-0.663092	4.67407	-3.57399	0.000723563	0.0198266	-0.805314
ASB6	-0.414381	5.0252	-3.57387	0.000723844	0.0198266	-0.813069
RP11-20J15.3	-1.61601	-0.57235	-3.57381	0.000723979	0.0198266	-0.543289
CAMSAP3	1.02687	4.64769	3.57371	0.000724192	0.0198266	-0.760655
TMEM192	0.727531	5.60748	3.57354	0.000724582	0.0198266	-0.810919
SPATS1	-2.7693	-2.07777	-3.57234	0.000727297	0.0198709	-0.524623
AC003090.1	-1.75883	-0.926997	-3.57226	0.000727471	0.0198709	-0.538459
GGT1	1.1672	5.94814	3.57098	0.000730388	0.0199332	-0.821217
COL25A1	-1.5462	2.46037	-3.56939	0.00073402	0.0200148	-0.72516
ESRP2	0.888873	4.0255	3.56879	0.000735386	0.0200346	-0.743918
CTXN1	-1.20907	3.35571	-3.56823	0.000736667	0.0200415	-0.772154
ILDR1	1.55062	2.45506	3.56812	0.00073692	0.0200415	-0.621832
ACSS2	0.909617	5.85726	3.56758	0.00073815	0.0200575	-0.833943
SOWAHB	1.29162	2.58124	3.56628	0.000741166	0.0201195	-0.644126
TMCC2	-0.754075	3.14363	-3.56604	0.000741715	0.0201195	-0.754101
RP5-1112D6.7	0.875964	3.02325	3.56503	0.000744046	0.0201485	-0.688419
BHLHE22	-1.39303	-0.594491	-3.56502	0.000744071	0.0201485	-0.567895
SEMA3D	-1.91357	2.71167	-3.56376	0.000746982	0.0202098	-0.764649
TBC1D19	0.708474	3.86427	3.56335	0.000747942	0.0202183	-0.754589
AC104772.1	2.25525	-1.67628	3.56249	0.000749951	0.0202522	-0.545978
ERI3-IT1	0.617462	1.37425	3.56226	0.00075049	0.0202522	-0.612209
STAP2	0.983887	3.31468	3.56122	0.000752914	0.0203002	-0.715656
CNRIP1	-0.820748	3.13191	-3.55597	0.000765317	0.0206168	-0.784638
COL13A1	-1.24117	0.96054	-3.55443	0.000768989	0.0206979	-0.665735
ABCC3	1.39022	5.52456	3.55375	0.000770608	0.0207199	-0.849325
AC005559.3	-1.66648	-3.31944	-3.55353	0.000771129	0.0207199	-0.56647
SPATS2L	0.608646	6.71196	3.55311	0.000772147	0.0207294	-0.90416
RP11-214O14.1	1.02145	-0.335918	3.55253	0.000773548	0.0207492	-0.570865
BEND7	0.694835	5.24449	3.55089	0.0007775	0.0208374	-0.864216
RP11-59E19.3	-1.79179	-3.4326	-3.55033	0.000778846	0.0208556	-0.575379
RP11-256I9.2	-1.37546	-2.80235	-3.54859	0.000783064	0.0209457	-0.577983
RP11-568J23.8	1.60177	-1.44857	3.54828	0.000783813	0.0209457	-0.579868
CTD-2207P18.1	-1.53105	-1.71883	-3.54812	0.000784217	0.0209457	-0.583829
HOXA3	0.894898	5.26718	3.54753	0.000785653	0.0209662	-0.87044
RP11-75I2.3	2.06488	1.1692	3.546	0.000789397	0.0210425	-0.613245
TENM4	-1.45039	5.1095	-3.54581	0.000789858	0.0210425	-0.912147
ALDH1A1	1.64579	7.23334	3.54539	0.00079088	0.0210518	-0.924189
ANO2	-1.01084	1.92314	-3.54391	0.00079453	0.021131	-0.745727
SBSN	-1.49492	-3.16858	-3.5417	0.000799987	0.0212195	-0.597717
MED12L	-1.17088	2.07476	-3.54165	0.000800111	0.0212195	-0.763239
ERN1	-0.460137	5.73631	-3.54159	0.000800262	0.0212195	-0.928665
POU3F3	1.28141	6.17233	3.54131	0.000800959	0.0212195	-0.912552
PALMD	-0.815769	4.16687	-3.54119	0.000801249	0.0212195	-0.881255
NSUN4	0.496234	5.13409	3.54049	0.000802998	0.0212479	-0.89304
RP11-101O6.2	0.968721	0.384778	3.53965	0.000805092	0.0212853	-0.62456
BANP	-0.554589	4.37563	-3.53774	0.000809874	0.0213937	-0.895954
GLUD2	0.775479	2.69841	3.5372	0.000811227	0.0213953	-0.752002
GPR158	-2.07795	-1.72736	-3.53717	0.000811304	0.0213953	-0.619719
GALNT8	-1.74997	0.874132	-3.5368	0.000812239	0.0214019	-0.7212
AC008079.10	-1.088	4.2748	-3.5336	0.000820335	0.0215804	-0.91088
FRK	0.948258	6.54633	3.53338	0.000820898	0.0215804	-0.952659
PRKAA2	0.854907	6.16465	3.53293	0.000822036	0.0215804	-0.943545
ZNF703	-0.825679	4.61987	-3.53265	0.00082275	0.0215804	-0.924948
UPK3B	-0.95708	0.843067	-3.53199	0.000824447	0.0215804	-0.714912
CACNA1C	-0.98726	5.9522	-3.53192	0.00082461	0.0215804	-0.969046
OR2AK2	-1.89075	-2.42582	-3.53147	0.000825753	0.0215804	-0.624034
MEIS3P2	-1.21781	1.91923	-3.53118	0.000826513	0.0215804	-0.789038
RP11-281P23.2	1.93868	-1.73793	3.53115	0.000826586	0.0215804	-0.628017
GADD45A	-0.795741	4.9567	-3.53109	0.000826731	0.0215804	-0.94069
CYTH3	-0.506691	5.49681	-3.53106	0.000826807	0.0215804	-0.952924
RP11-813N20.1	2.15264	-1.87922	3.53088	0.000827285	0.0215804	-0.630511
UBE2L2	-1.23168	-0.0359212	-3.5305	0.00082826	0.0215839	-0.678814
AMZ2P1	-0.529776	2.77493	-3.53029	0.000828797	0.0215839	-0.826991
MTNR1B	-2.95483	-0.0482797	-3.52966	0.000830398	0.0216076	-0.72164
AMMECR1	0.56952	4.68438	3.52926	0.000831424	0.0216163	-0.905933
CHST4	1.08069	0.548583	3.52675	0.000837927	0.0217673	-0.660979
PPP1R15A	-0.84095	5.8989	-3.52458	0.000843577	0.0218959	-0.987201
IGLV2-8	-1.82773	0.96045	-3.52413	0.000844756	0.0219053	-0.769105
CKAP4	-0.665416	5.65236	-3.52378	0.000845653	0.0219053	-0.980834
BAI2	-1.1643	3.2365	-3.52363	0.000846039	0.0219053	-0.891129
GALNT11	1.0172	6.89925	3.52263	0.000848662	0.0219489	-0.991396
TCEB3C	-1.51681	4.28936	-3.52221	0.000849782	0.0219489	-0.954105
THUMPD1	0.631062	5.69746	3.52219	0.000849823	0.0219489	-0.964514
MIR497HG	-0.90854	2.4226	-3.52048	0.000854332	0.0220382	-0.845013
RP11-130C19.3	1.20152	0.0565095	3.52035	0.000854692	0.0220382	-0.663347
SEL1L3	0.931511	5.39566	3.51998	0.000855657	0.022045	-0.953011
TTC9	0.888992	3.11777	3.51928	0.000857512	0.0220746	-0.825475
RPS3AP54	1.63118	-1.70148	3.51845	0.000859726	0.0221049	-0.660216
IGLV6-57	-1.91871	-0.954196	-3.5183	0.000860102	0.0221049	-0.68972
CLK3P2	-1.70665	-3.02966	-3.51748	0.000862302	0.0221433	-0.660466
BHMT	2.37377	6.83173	3.51528	0.000868192	0.0222762	-0.985137
PBXIP1	-0.799221	6.41021	-3.51297	0.000874399	0.0224171	-1.0321
RP11-397G17.1	3.86306	0.329846	3.51198	0.000877088	0.0224677	-0.674624
RP11-736K20.5	0.953447	2.32676	3.51136	0.000878767	0.0224923	-0.792441
UBA1	-0.59375	8.25775	-3.5104	0.000881358	0.0225177	-1.0657
CTD-2540F13.2	1.2198	1.07753	3.51024	0.000881797	0.0225177	-0.724986
HSPA4L	0.744228	5.3476	3.5102	0.00088192	0.0225177	-0.982647
H1FX	-0.713723	5.63831	-3.50663	0.000891671	0.0227482	-1.03072
RP11-489E7.4	-1.18144	0.151087	-3.50562	0.000894452	0.0228005	-0.760991
RP11-486F17.1	1.78095	-1.42311	3.50422	0.000898331	0.0228808	-0.696478
ULK2	-0.373107	5.02207	-3.50365	0.000899913	0.0229024	-1.01476
NECAB3	-0.646457	4.54542	-3.5027	0.000902547	0.0229508	-1.00438
DDX39B	-0.438059	7.84116	-3.50172	0.000905286	0.0229801	-1.08511
LGI4	-0.992312	2.32943	-3.50168	0.000905394	0.0229801	-0.892607
NIPA1	0.664341	4.98665	3.50122	0.000906685	0.0229801	-0.994845
RP13-1039J1.3	-1.6465	-2.71251	-3.50101	0.000907282	0.0229801	-0.703676
OR4F15	2.46864	-0.794202	3.50079	0.000907897	0.0229801	-0.704443
LRP4	1.09978	4.24128	3.50071	0.000908103	0.0229801	-0.941199
ZNF826P	1.5273	4.16661	3.50022	0.000909485	0.0229965	-0.917583
CTD-3051D23.1	1.11108	0.628465	3.4999	0.000910382	0.0230006	-0.739455
GRIA1	-1.56163	-0.35905	-3.49863	0.000913954	0.0230722	-0.759544
OAZ2	-0.38541	6.34644	-3.4971	0.000918288	0.0231453	-1.07084
PALB2	0.510613	3.76079	3.49708	0.000918328	0.0231453	-0.941964
IPO5P1	0.602447	3.82934	3.49627	0.000920626	0.0231845	-0.947036
DIO3OS	-1.50221	1.35207	-3.49438	0.000925992	0.0233009	-0.865734
IL32	1.07434	6.24023	3.49375	0.000927814	0.023328	-1.05518
EPHA2	0.927617	5.42557	3.49278	0.000930577	0.0233787	-1.03372
RP11-113E21.3	1.78551	-2.65496	3.492	0.000932809	0.023416	-0.736358
SERPIND1	-0.688941	1.8775	-3.49017	0.000938096	0.0235298	-0.883211
INAFM1	-0.931875	3.51134	-3.48947	0.000940121	0.0235617	-0.999956
SERPINF2	1.51772	6.06612	3.48905	0.000941324	0.023573	-1.05368
SDC1	1.48613	6.76303	3.48658	0.000948512	0.023734	-1.08319
ELN	-1.39167	5.73357	-3.48542	0.000951908	0.0238	-1.10194
MAN2A1	-0.586843	6.76552	-3.48493	0.000953344	0.0238169	-1.11715
GRAMD2	1.09298	2.04961	3.48368	0.000957003	0.0238892	-0.850404
OR7E14P	1.35496	1.79873	3.48184	0.000962444	0.0240059	-0.83686
TGFB1	-1.04416	6.23109	-3.48108	0.000964675	0.0240424	-1.12193
LPAR5	-0.903612	2.90229	-3.48035	0.00096686	0.0240777	-0.987561
CYP4F29P	-1.97551	-1.41718	-3.47926	0.000970115	0.0241334	-0.782845
SPIRE1	-0.531281	6.33789	-3.47878	0.000971526	0.0241334	-1.12529
AC003984.1	2.13843	-0.538489	3.47869	0.000971805	0.0241334	-0.762893
ROBO2	-1.33612	2.62188	-3.47856	0.00097218	0.0241334	-0.985278
AC112229.1	-0.957164	1.63936	-3.47758	0.000975122	0.0241872	-0.910956
AK8	0.972405	0.72293	3.47679	0.000977494	0.0242137	-0.807695
PLB1	-0.815085	1.67937	-3.47671	0.000977739	0.0242137	-0.912605
CTB-31N19.4	-1.52681	-3.66504	-3.47575	0.000980622	0.024262	-0.773112
RP11-436K8.1	2.70779	0.776683	3.47547	0.000981456	0.024262	-0.778707
AP1S3	0.827247	3.85965	3.47501	0.000982842	0.024262	-1.001
BMS1P2	0.760349	3.57651	3.47489	0.000983224	0.024262	-0.986473
RP11-453E17.4	1.02934	-0.0935701	3.47477	0.000983562	0.024262	-0.785826
OSTM1	-0.771203	5.53512	-3.47422	0.000985246	0.0242844	-1.1214
AJ011931.1	-1.41133	-1.16692	-3.4727	0.000989847	0.0243689	-0.798142
GDPD5	-0.876384	4.46209	-3.47246	0.00099058	0.0243689	-1.09179
ANKRD20A5P	-1.59953	1.9925	-3.47232	0.00099101	0.0243689	-0.972997
MAL2	1.96456	3.87501	3.47038	0.000996928	0.02448	-0.968221
TP63	-1.28074	0.172978	-3.47032	0.000997091	0.02448	-0.855972
NIT2	0.89562	5.98032	3.46984	0.000998568	0.0244966	-1.11772
LBR	0.582789	5.54118	3.46959	0.000999335	0.0244966	-1.11028
PTMS	-0.829181	6.5475	-3.46858	0.00100245	0.0245537	-1.16228
RP11-142C4.6	1.2716	0.457599	3.46797	0.0010043	0.0245799	-0.816068
AC005392.13	-2.08455	-2.11041	-3.46748	0.00100584	0.0245983	-0.802265
LINC00520	-1.86806	-1.24593	-3.4671	0.00100702	0.0246078	-0.818444
PSD	-0.816652	1.96564	-3.46678	0.00100799	0.0246123	-0.962538
NME5	0.914107	1.70373	3.46643	0.00100906	0.0246194	-0.886926
CTTNBP2NL	0.491709	5.63993	3.46594	0.00101058	0.0246372	-1.12553
SNORA35	-1.90357	0.0781506	-3.46497	0.0010136	0.0246915	-0.879694
PLEKHM1	-0.892995	6.7081	-3.46295	0.00101989	0.0248154	-1.18186
DLEU2	-0.680499	3.64452	-3.46283	0.00102027	0.0248154	-1.07584
PID1	-0.920646	2.73764	-3.46221	0.00102221	0.024837	-1.02795
OR8A1	-1.79793	-3.1599	-3.46184	0.00102338	0.024837	-0.807029
KIF7	-1.01297	3.40759	-3.46179	0.00102353	0.024837	-1.07538
HRSP12	1.4398	3.68471	3.4614	0.00102476	0.0248474	-0.999597
STX11	-0.94647	2.58723	-3.46022	0.00102848	0.0249184	-1.02517
RP11-418B12.1	-1.73367	-3.76576	-3.45969	0.00103013	0.0249308	-0.814606
MIR4500HG	2.33957	-1.45124	3.45955	0.00103059	0.0249308	-0.814308
SCGN	2.55664	-0.22646	3.45902	0.00103226	0.024952	-0.815074
SLC25A4	-0.695929	5.24682	-3.4579	0.00103582	0.0250187	-1.15745
PLA2G7	-1.81846	2.00356	-3.45762	0.00103671	0.0250209	-1.01974
FUT6	2.49757	4.22016	3.45732	0.00103764	0.0250242	-1.00239
ZNF19	0.604081	2.96789	3.45603	0.00104176	0.0250846	-1.00559
RP11-35J23.1	-1.98812	-1.7775	-3.45587	0.00104226	0.0250846	-0.836762
PGRMC2	-0.677418	6.00007	-3.45551	0.0010434	0.0250846	-1.18534
KIF12	1.55386	6.27655	3.45533	0.001044	0.0250846	-1.15638
RP11-147L13.15	-0.719698	3.32305	-3.45528	0.00104416	0.0250846	-1.08057
TMEM151B	-0.974223	0.244598	-3.45497	0.00104514	0.0250889	-0.89683
QSER1	0.677768	6.43253	3.45435	0.00104714	0.0251051	-1.17992
ALMS1	0.536228	6.85376	3.45426	0.00104742	0.0251051	-1.19277
UBL3	-0.630729	5.87808	-3.45355	0.00104968	0.0251402	-1.18696
IL18BP	-0.557639	4.83577	-3.45206	0.00105449	0.0252361	-1.15762
SLC51A	-0.765799	2.53362	-3.45161	0.00105596	0.0252518	-1.03696
NRTN	1.33648	2.53878	3.45127	0.00105705	0.0252586	-0.96352
MFAP3L	0.936378	5.4665	3.45093	0.00105815	0.0252657	-1.15126
CHRM3	1.49117	3.83513	3.44897	0.00106451	0.0253982	-1.04691
MT1G	2.72014	4.09045	3.44732	0.00106991	0.0255075	-1.01077
RALA	-0.52832	4.46647	-3.44684	0.00107148	0.025518	-1.15824
MESDC1	-0.709989	5.19985	-3.44663	0.00107216	0.025518	-1.18836
CHRM3-AS1	2.04608	-1.67291	3.44644	0.00107279	0.025518	-0.848737
PRKACA	-0.364721	6.11938	-3.44598	0.0010743	0.0255297	-1.21101
IL1RAPL1	1.87842	-0.698958	3.44579	0.00107492	0.0255297	-0.849403
GRK5	-0.785418	3.86286	-3.44455	0.00107899	0.0255702	-1.14179
CTXN2	-1.77491	-2.52296	-3.44453	0.00107906	0.0255702	-0.853984
RP11-79E3.3	-1.58865	-3.22596	-3.44449	0.00107921	0.0255702	-0.852673
PRICKLE2-AS1	0.922892	2.64644	3.44428	0.00107989	0.0255702	-1.00048
POLH	0.495148	4.48893	3.44272	0.00108504	0.0256727	-1.14024
RP9P	-0.625944	1.88833	-3.44128	0.00108985	0.0257626	-1.02279
LINC01099	-1.86636	-0.05624	-3.44108	0.00109049	0.0257626	-0.939391
TPI1P3	0.921911	1.09957	3.44012	0.00109369	0.0258189	-0.925755
NPHP1	0.653698	3.45717	3.43838	0.00109952	0.0259318	-1.08442
CLEC11A	-0.955007	3.47981	-3.43811	0.00110044	0.0259318	-1.1452
MKL2	0.499741	6.73542	3.43795	0.00110096	0.0259318	-1.23612
CUX2	-1.42011	-0.588901	-3.4374	0.00110282	0.025956	-0.91603
SLC17A2	2.59907	0.70396	3.43685	0.00110468	0.0259632	-0.883398
RP11-486I11.2	-0.74817	0.332942	-3.43658	0.00110558	0.0259632	-0.946494
C1QTNF9B-AS1	-1.24165	-0.332771	-3.43657	0.00110561	0.0259632	-0.923788
FREM2	1.4763	5.96889	3.43623	0.00110676	0.0259707	-1.19939
TMPRSS11A	1.51003	-0.86393	3.43538	0.00110965	0.0260149	-0.876759
RHOT1P1	-1.52737	-0.868989	-3.43502	0.00111087	0.0260149	-0.912082
TSC22D2	-0.5296	7.02279	-3.43481	0.00111159	0.0260149	-1.26409
CHDH	1.20839	5.56086	3.4347	0.00111197	0.0260149	-1.19504
TEX2	-0.618346	5.88238	-3.43397	0.00111444	0.0260533	-1.24216
COX11	0.441292	5.62667	3.43284	0.00111828	0.0261236	-1.2202
CTD-2006M22.2	-1.64713	-0.537254	-3.43207	0.00112091	0.0261525	-0.935322
MGA	0.524812	7.17557	3.43189	0.00112152	0.0261525	-1.26315
CEACAMP7	-2.06358	-1.95315	-3.43174	0.00112203	0.0261525	-0.900278
JADE1	0.527228	6.15131	3.43041	0.00112662	0.0262399	-1.24226
EVI5L	-0.66635	4.65712	-3.42884	0.00113201	0.026346	-1.21943
RP11-432I5.2	2.06046	-1.27894	3.4277	0.00113595	0.026418	-0.896131
TTC30B	0.800064	3.17653	3.42719	0.0011377	0.0264392	-1.08448
RPL35P6	-1.25647	-1.87772	-3.42677	0.00113916	0.0264534	-0.904201
RP11-649G15.2	1.33917	-0.742184	3.42646	0.00114026	0.0264593	-0.901083
SLC25A29	0.907249	7.06162	3.42575	0.00114272	0.0264968	-1.2737
PROK2	-1.70338	-1.87133	-3.42407	0.00114858	0.0265954	-0.917207
TRIM72	-3.51161	0.817932	-3.42405	0.00114867	0.0265954	-1.0768
RP11-190D6.1	0.817748	1.78134	3.42361	0.0011502	0.0266111	-1.0097
MYO5A	-0.664971	6.622	-3.42315	0.00115181	0.0266286	-1.29073
RPS3AP39	1.58373	-1.96358	3.42284	0.00115291	0.0266344	-0.91002
CADM2	-2.17318	-0.510429	-3.42103	0.00115928	0.0267502	-0.981895
CTD-2619J13.8	-0.851932	1.32467	-3.42093	0.00115963	0.0267502	-1.05255
SLC16A12	1.80474	5.1266	3.41944	0.00116489	0.0268517	-1.19422
OR4G2P	2.14627	-2.02838	3.41817	0.00116942	0.0269361	-0.923482
RP13-644M16.5	2.36123	0.56917	3.41792	0.00117032	0.0269371	-0.933024
SLC5A9	1.1467	3.13159	3.41696	0.00117372	0.0269956	-1.10417
RP11-417J1.3	-1.61122	-3.70938	-3.41591	0.00117749	0.0270625	-0.927806
RP11-551L14.4	1.09476	-0.841164	3.41511	0.00118037	0.0271086	-0.931138
NUTM1	-1.64615	-1.62368	-3.41396	0.00118448	0.0271831	-0.948346
RP11-24B13.2	1.3112	1.58693	3.41328	0.00118695	0.0272199	-1.01138
TTC28	0.610445	7.23041	3.41219	0.00119089	0.0272902	-1.31991
LRRC30	-1.90261	-3.19585	-3.41183	0.00119219	0.0273001	-0.937209
TOM1L1	0.72783	5.29884	3.41082	0.00119586	0.027364	-1.26348
PDCD6	0.606933	6.49035	3.41053	0.0011969	0.0273655	-1.30618
ST6GALNAC4	-0.677379	3.72447	-3.41022	0.00119805	0.0273655	-1.22749
PGAM1P10	-1.49087	-3.02258	-3.41008	0.00119855	0.0273655	-0.941729
SCRT2	-1.46843	-2.41825	-3.40933	0.00120129	0.0274081	-0.945456
MYL2	-1.3243	-3.8053	-3.40882	0.00120315	0.027422	-0.946986
ZNF433	0.628751	3.56294	3.40869	0.00120365	0.027422	-1.17507
LINC01018	-1.29303	-0.335257	-3.40647	0.00121178	0.0275872	-1.00789
RP11-586K2.1	-1.3567	-1.80793	-3.405	0.00121719	0.0276902	-0.963941
CASC1	1.22797	0.70892	3.40458	0.00121877	0.0277059	-0.998944
RP11-1084J3.3	1.30404	1.12321	3.40375	0.00122185	0.0277558	-1.01512
CMKLR1	-0.851555	4.58016	-3.40349	0.00122281	0.0277575	-1.29054
CTA-276F8.1	0.692825	2.42407	3.40286	0.00122515	0.0277905	-1.11263
HYKK	0.709229	2.95264	3.40143	0.00123048	0.0278378	-1.14914
MIR600HG	0.579394	4.62393	3.40141	0.00123056	0.0278378	-1.26121
SYT12	1.51524	1.62041	3.40076	0.001233	0.0278378	-1.03931
LINC01342	1.743	2.17844	3.40042	0.00123425	0.0278378	-1.06742
FAM86C1	0.528045	3.00272	3.40037	0.00123446	0.0278378	-1.16206
IFT22	0.693621	3.84371	3.40029	0.00123475	0.0278378	-1.21328
RP11-131L23.1	1.05204	2.2798	3.40007	0.00123555	0.0278378	-1.09511
GLUD1	1.03269	6.79219	3.39999	0.00123586	0.0278378	-1.33746
RP11-543H23.1	1.41701	0.0150476	3.39992	0.00123612	0.0278378	-0.982082
THUMPD3P1	1.31317	-0.239564	3.39992	0.00123613	0.0278378	-0.97746
ENTPD2	1.74427	1.70153	3.39958	0.00123739	0.0278461	-1.04579
LAMA1	-0.989879	6.74906	-3.39909	0.00123925	0.0278547	-1.36411
RP11-61J19.3	-1.37719	-3.58832	-3.39901	0.00123955	0.0278547	-0.971272
TM4SF18	1.06532	3.69453	3.39567	0.00125218	0.0281183	-1.19897
PRL	-2.37059	-3.08018	-3.39521	0.00125393	0.0281208	-0.981774
TRIM58	-1.43559	0.578848	-3.39488	0.00125519	0.0281208	-1.09681
MBNL3	1.07777	5.49366	3.3947	0.00125585	0.0281208	-1.30611
AKT1	-0.429181	7.00131	-3.39431	0.00125736	0.0281208	-1.37706
SSR1P2	1.49369	-2.58851	3.39425	0.00125757	0.0281208	-0.985747
ST13P15	-0.877367	-0.136895	-3.39422	0.00125768	0.0281208	-1.0422
PNMAL1	0.997226	4.52999	3.3935	0.00126044	0.0281624	-1.26538
RP11-295I5.4	1.46606	-2.1552	3.39267	0.00126362	0.0281968	-0.987958
TBC1D24	0.58109	5.72392	3.39263	0.00126378	0.0281968	-1.33428
CNTNAP3	0.751347	3.44851	3.3921	0.00126582	0.0282069	-1.20883
PQLC1	-0.794615	5.67552	-3.39204	0.00126603	0.0282069	-1.35775
RP11-884K10.7	0.95583	2.94581	3.39152	0.00126803	0.0282312	-1.16416
GRID1-AS1	2.13238	-0.587141	3.38872	0.00127882	0.0284512	-0.998338
RP11-173M11.2	1.05283	1.23472	3.38762	0.00128312	0.0285126	-1.07375
AC114812.9	1.95413	0.583372	3.38754	0.0012834	0.0285126	-1.02091
AC144831.1	-0.928552	2.46522	-3.38715	0.00128492	0.0285261	-1.22045
DUT	-0.513246	4.55895	-3.38599	0.00128945	0.0286063	-1.33325
KLHL23	0.992739	3.67759	3.38555	0.00129118	0.0286148	-1.23065
TMEM132B	-1.16139	0.962762	-3.38543	0.00129165	0.0286148	-1.13212
UBE2D4	0.51081	4.35021	3.38377	0.00129816	0.0287386	-1.29716
APITD1	0.718314	2.39046	3.38289	0.00130162	0.0287949	-1.16601
KLF8P1	1.44922	-1.90089	3.3824	0.00130354	0.0288168	-1.01345
SNX29P2	-0.977301	2.80415	-3.38132	0.00130781	0.0288909	-1.25923
SLCO4A1	1.71678	3.18941	3.38098	0.00130916	0.0289003	-1.18687
AC019100.7	-2.02294	0.857868	-3.37991	0.00131341	0.0289643	-1.16904
NUP214	0.408423	6.83466	3.37952	0.00131497	0.0289643	-1.40527
DAZAP1	-0.414784	6.71628	-3.3795	0.00131505	0.0289643	-1.41291
FAHD2CP	-0.678839	1.70201	-3.37932	0.00131576	0.0289643	-1.18248
RP11-435O5.7	1.40891	-0.190869	3.37701	0.00132499	0.029147	-1.03697
RP11-50C13.2	1.54755	0.710136	3.37661	0.00132659	0.0291617	-1.06481
RP11-312J18.7	-1.77517	-3.35436	-3.3762	0.00132822	0.0291769	-1.02907
IMPG1	1.21209	0.975615	3.37498	0.00133315	0.0292647	-1.08838
KIF27	0.686273	3.6318	3.37464	0.00133452	0.0292744	-1.26947
ADAMTSL5	-1.22916	2.24409	-3.37403	0.00133698	0.0293077	-1.25129
SNX22	-0.843915	5.25813	-3.37349	0.00133918	0.0293171	-1.39758
ERICH5	1.26246	1.83653	3.37336	0.0013397	0.0293171	-1.13585
LECT2	1.72886	-1.28499	3.37323	0.00134021	0.0293171	-1.03685
SGSM1	-1.20123	2.72261	-3.37177	0.00134612	0.0294257	-1.29099
RADIL	-0.90237	1.3015	-3.37133	0.00134795	0.0294425	-1.18568
FXYD1	-1.29707	1.38004	-3.37112	0.00134877	0.0294425	-1.20397
ZNF428	-0.792779	4.19074	-3.37088	0.00134977	0.0294437	-1.36504
LTC4S	-1.00177	1.81262	-3.37047	0.00135144	0.0294597	-1.22563
PLEKHF2	0.587856	4.41295	3.36974	0.00135442	0.0295042	-1.34005
ZBTB45P2	-1.45146	3.4454	-3.36947	0.00135553	0.0295077	-1.34635
RP11-289K10.1	-1.36673	-3.86693	-3.36834	0.00136015	0.0295877	-1.05036
GP5	-0.968609	-0.221781	-3.36667	0.00136704	0.0297169	-1.11647
CA11	-1.03349	2.44323	-3.36526	0.00137286	0.0298227	-1.28491
CTD-2311M21.3	-1.38971	-0.457294	-3.36318	0.00138153	0.0299903	-1.11859
RIMKLA	1.09945	2.95592	3.3624	0.00138478	0.03004	-1.24217
PKD1L2	-1.35226	8.59666	-3.3619	0.00138688	0.0300563	-1.4931
TAF1D	0.502114	6.09014	3.36158	0.00138822	0.0300563	-1.43347
RP11-355N15.3	1.7437	0.457302	3.36153	0.00138841	0.0300563	-1.09002
LRRC25	-0.809631	2.96752	-3.36112	0.00139012	0.0300724	-1.32321
SIGLEC9	-0.93897	2.07252	-3.36071	0.00139184	0.0300856	-1.26693
KRT80	2.06779	2.77886	3.3604	0.00139316	0.0300856	-1.19956
RP1-276N6.2	1.78084	-1.99538	3.36029	0.00139361	0.0300856	-1.07044
ZNF83	0.53166	6.66278	3.35969	0.00139616	0.0301005	-1.45466
RP11-211N8.2	1.06039	1.16552	3.35967	0.00139622	0.0301005	-1.14626
CTD-2281E23.1	-2.41236	-0.525982	-3.35851	0.00140112	0.0301853	-1.15075
METTL7B	1.27158	3.00728	3.35714	0.0014069	0.030289	-1.25511
ARHGEF25	-0.861345	4.09519	-3.35645	0.00140984	0.0302995	-1.40191
PSAT1	1.53005	3.64529	3.35643	0.00140994	0.0302995	-1.28908
RP11-973N13.4	0.924767	0.424315	3.35619	0.00141097	0.0302995	-1.12226
OARD1	0.551714	4.19774	3.35612	0.00141126	0.0302995	-1.36602
DEFB1	1.79033	4.59365	3.35589	0.00141224	0.0302998	-1.34018
RP11-143A12.3	-1.83044	-3.24894	-3.35381	0.00142109	0.0304687	-1.08659
RBM46	1.71758	-2.58258	3.3522	0.001428	0.030596	-1.09275
UBALD1	-0.781202	5.27111	-3.35111	0.00143273	0.0306762	-1.46013
RMST	2.55586	4.11409	3.35055	0.00143513	0.0306861	-1.29004
RP11-483H20.4	-1.25057	-1.6462	-3.35046	0.00143551	0.0306861	-1.10977
NARF	-0.66969	4.91117	-3.35032	0.00143613	0.0306861	-1.4485
PLD5	-1.70184	1.13232	-3.34904	0.00144169	0.0307839	-1.26207
AC004603.4	-2.63196	0.943224	-3.34771	0.00144746	0.0308657	-1.28067
PPP3CA	-0.482258	5.12438	-3.3477	0.00144749	0.0308657	-1.45993
AIFM2	-0.537883	3.6474	-3.34721	0.00144965	0.0308906	-1.39476
LRRC49	0.715201	2.80973	3.34588	0.00145544	0.0309645	-1.28922
CLDN10	1.99097	3.36033	3.34585	0.00145559	0.0309645	-1.27465
TNXB	-1.11768	6.9466	-3.34574	0.00145608	0.0309645	-1.51836
ARRB1	-0.584566	6.06205	-3.34531	0.00145793	0.0309827	-1.49574
PIP5K1P1	0.934211	-0.815776	3.34415	0.00146306	0.0310707	-1.11756
PARP4	0.590906	6.72934	3.34387	0.00146426	0.031075	-1.4994
LHFPL3	1.90848	0.00529563	3.34236	0.00147094	0.0311957	-1.12637
SULT2A1	-2.00955	-3.33749	-3.34205	0.0014723	0.0312033	-1.11673
ARL6	0.827819	2.89712	3.34102	0.00147688	0.0312737	-1.30451
TBC1D8	-0.60755	5.26822	-3.34086	0.00147761	0.0312737	-1.48593
PKLR	2.63714	2.11043	3.3406	0.00147877	0.0312769	-1.19011
CTB-49A3.4	-2.00572	-1.87617	-3.34012	0.00148086	0.0312992	-1.14118
PHACTR4	0.404996	6.07858	3.33978	0.00148238	0.0312992	-1.49615
CEACAM6	-1.53405	-3.1176	-3.33969	0.00148282	0.0312992	-1.12264
CTSC	0.840338	7.39478	3.33907	0.00148558	0.0313363	-1.52521
LYRM1	0.495472	4.09441	3.33807	0.00149006	0.0314096	-1.41188
ME2P1	1.93547	-1.9085	3.33626	0.00149817	0.0315594	-1.13137
LINC01057	0.827353	4.09415	3.33567	0.00150081	0.0315936	-1.40663
SLC23A1	1.18283	2.79741	3.335	0.00150384	0.0316362	-1.30593
ROM1	-0.94086	1.37319	-3.33399	0.00150843	0.0317116	-1.29582
C1orf210	2.09179	1.3221	3.33328	0.00151165	0.0317559	-1.18954
IRS2	-0.743316	7.0758	-3.33307	0.00151257	0.0317559	-1.5524
GXYLT2	-0.757774	3.81441	-3.3323	0.00151608	0.031791	-1.45061
CAND1	-0.6214	6.97102	-3.33226	0.00151627	0.031791	-1.5517
NUS1P2	2.69649	2.37118	3.33127	0.00152077	0.0317939	-1.22671
DPP10	-1.74795	-2.10338	-3.33125	0.00152088	0.0317939	-1.15623
SEPSECS	0.671774	4.65328	3.33115	0.00152133	0.0317939	-1.45483
AP001626.1	1.79649	3.2886	3.3311	0.00152158	0.0317939	-1.31945
RPL9P30	0.968548	-0.222775	3.33091	0.00152243	0.0317939	-1.16365
CTD-2373N4.3	0.715009	4.84395	3.33089	0.00152251	0.0317939	-1.46489
LINC00630	0.466893	2.8184	3.33047	0.00152446	0.0318135	-1.34822
CLEC18A	1.82618	4.18289	3.33013	0.00152601	0.0318246	-1.38495
RP11-1365D11.1	0.999679	-0.802837	3.3296	0.00152843	0.0318539	-1.1547
DYX1C1	0.770754	1.19549	3.32903	0.00153103	0.0318697	-1.23736
RPL21P109	1.67399	-0.926003	3.32898	0.00153128	0.0318697	-1.15176
EPB41L5	0.633637	5.85491	3.32877	0.00153225	0.0318697	-1.51532
RP11-736K20.4	0.667178	3.60597	3.32821	0.00153482	0.0319021	-1.39861
PDZD3	1.82105	3.04161	3.3276	0.00153764	0.0319394	-1.31645
CLDN4	1.4573	5.23457	3.32663	0.0015421	0.0320027	-1.47422
CTB-113D17.1	0.866707	3.04102	3.3265	0.00154273	0.0320027	-1.35132
ZHX3	0.500768	6.85299	3.32603	0.00154488	0.0320261	-1.55342
IQCK	0.578529	3.19027	3.32417	0.00155351	0.0321498	-1.38428
NBAT1	0.864262	2.13445	3.32409	0.00155389	0.0321498	-1.29983
RP11-481J2.4	0.626544	0.909422	3.32408	0.00155393	0.0321498	-1.24017
JAZF1-AS1	-1.20638	-1.28811	-3.32231	0.0015622	0.0322855	-1.19286
RP11-14N7.2	1.04686	1.12561	3.32224	0.00156255	0.0322855	-1.2444
RP3-425C14.5	0.838485	0.822209	3.32171	0.00156502	0.0323021	-1.23527
BST1	-0.764019	1.9024	-3.32163	0.00156542	0.0323021	-1.35531
STON2	0.712752	5.73296	3.32115	0.00156766	0.032327	-1.53049
GABBR2	-1.5367	-1.71371	-3.32066	0.00156997	0.032349	-1.18927
KCNJ15	1.74225	6.34814	3.32048	0.00157079	0.032349	-1.52958
DUSP7	-0.532026	4.25779	-3.31949	0.00157547	0.0324241	-1.50478
LA16c-380H5.5	1.23121	0.259321	3.3189	0.00157825	0.0324599	-1.20637
FKBP5	-1.13438	6.18811	-3.31855	0.0015799	0.0324725	-1.57882
RBMXL3	-1.26605	-0.346642	-3.31755	0.00158467	0.0325492	-1.24476
AC019070.1	0.717802	0.747786	3.31675	0.00158847	0.0326059	-1.24646
CTD-3076M17.1	2.85381	3.00229	3.31635	0.00159037	0.0326159	-1.30029
ZDHHC9	0.585153	5.24018	3.31619	0.00159112	0.0326159	-1.52898
RP11-319G9.3	0.79327	2.56775	3.31599	0.00159209	0.0326159	-1.35488
CTD-2024I7.13	0.872796	2.48008	3.31497	0.00159693	0.0326938	-1.34675
PTPLB	0.616616	5.05308	3.31442	0.00159956	0.0327262	-1.52364
AC062017.1	-1.11273	-1.85304	-3.31391	0.00160203	0.0327386	-1.19862
NT5M	-0.913148	2.27943	-3.31386	0.00160226	0.0327386	-1.40991
RP11-374I15.1	-1.81647	-3.53156	-3.31339	0.00160453	0.0327636	-1.18912
KCNJ4	3.76495	1.8898	3.31263	0.00160817	0.0328165	-1.22288
HTRA3	-1.40871	2.51688	-3.31198	0.00161131	0.0328591	-1.44658
EFCAB13	0.833561	4.02128	3.31133	0.00161445	0.0328889	-1.46826
KDM5C	-0.48257	7.04411	-3.31124	0.00161487	0.0328889	-1.61033
EEF1A2	4.15685	5.22551	3.30923	0.0016246	0.0330511	-1.39641
SLC38A1	0.783105	7.44321	3.30916	0.00162495	0.0330511	-1.60974
RP11-384J4.1	1.76804	-1.21755	3.3076	0.00163254	0.0331717	-1.20475
PARP3	-0.460968	4.40425	-3.30751	0.00163299	0.0331717	-1.54202
ZBTB38	0.659208	7.08937	3.30628	0.001639	0.0332721	-1.61097
PLLP	0.649054	4.07592	3.30485	0.00164601	0.0333927	-1.49764
RCC2P6	1.12918	0.936538	3.30374	0.00165152	0.0334828	-1.27686
RP11-76K13.3	-1.2744	-1.22651	-3.30318	0.00165426	0.0335166	-1.24472
RP13-1039J1.2	-1.81027	1.36612	-3.30142	0.00166297	0.0336713	-1.40511
EFHB	1.61349	-0.580196	3.30082	0.00166598	0.0336935	-1.22765
SMOC1	-1.46522	2.43816	-3.30077	0.00166622	0.0336935	-1.47024
CTB-79E8.3	-0.760813	-0.432931	-3.30013	0.00166939	0.0337358	-1.27628
FAM222B	0.384707	5.453	3.29958	0.00167217	0.0337702	-1.58741
SHMT1	0.909138	6.59689	3.29881	0.001676	0.0338259	-1.61563
MCF2L2	-1.33955	3.63805	-3.29832	0.00167844	0.0338401	-1.54892
LILRA2	-0.949661	0.851566	-3.29824	0.00167887	0.0338401	-1.35271
CEACAMP5	-2.37936	-0.255068	-3.29775	0.00168131	0.0338674	-1.33148
RP11-736N17.4	1.47547	0.0396561	3.29589	0.0016907	0.0340144	-1.25524
RP11-395M19.1	2.11662	-0.795922	3.29587	0.00169078	0.0340144	-1.236
RP11-541H12.1	-1.55528	-3.42508	-3.2941	0.00169974	0.0341728	-1.23781
KLK15	-1.90993	-1.40688	-3.29365	0.00170203	0.0341968	-1.27476
KANTR	0.498569	4.66621	3.29108	0.00171509	0.0344371	-1.57235
ANKRD18EP	0.915158	2.18327	3.29031	0.00171903	0.0344942	-1.39309
SYT3	2.98935	2.20414	3.28974	0.00172197	0.0345249	-1.32191
FAM98C	-0.649141	3.79431	-3.28959	0.00172277	0.0345249	-1.56494
IQCD	0.662459	1.48391	3.28895	0.00172601	0.0345677	-1.36742
TBC1D25	-0.337696	4.21234	-3.28781	0.00173193	0.0346501	-1.58459
RP3-467L1.6	1.15241	-0.764185	3.28773	0.00173234	0.0346501	-1.26166
RP11-519G16.3	1.32974	0.446506	3.28702	0.00173599	0.034701	-1.29467
LARP1B	0.426119	4.84648	3.28679	0.00173716	0.0347023	-1.59724
RP11-35L17.3	2.02166	-1.72834	3.28636	0.00173939	0.0347246	-1.25706
EEF1B2P7	0.616823	0.938208	3.28579	0.00174237	0.0347618	-1.34221
LRRC6	0.836852	3.03375	3.28498	0.00174657	0.0348235	-1.47245
LINC00922	-1.26529	-3.62407	-3.2839	0.0017522	0.0349135	-1.26321
SMYD2	0.450005	4.7572	3.28345	0.00175456	0.0349261	-1.59986
AC019117.2	2.43633	-1.20101	3.28297	0.00175705	0.0349261	-1.2662
DUSP4	-1.31375	3.12474	-3.2829	0.00175741	0.0349261	-1.56142
AC009014.3	2.07026	3.45983	3.28278	0.00175807	0.0349261	-1.45137
RP5-1112D6.8	0.61912	4.4232	3.28271	0.00175841	0.0349261	-1.57756
TMEM117	-0.461774	2.87179	-3.28179	0.00176324	0.0349999	-1.51983
C18orf63	1.68764	-2.5499	3.28026	0.0017713	0.0351375	-1.27288
RP11-4B16.3	-0.867603	1.26866	-3.2795	0.00177533	0.0351952	-1.43217
PHOSPHO2	0.558467	1.66231	3.27884	0.00177878	0.0352413	-1.4102
RND3	-0.943724	4.97292	-3.27786	0.00178398	0.0352966	-1.65472
USP43	0.862834	3.16423	3.27772	0.00178472	0.0352966	-1.49892
TSSC4	-0.604466	4.01503	-3.27764	0.00178514	0.0352966	-1.60827
TMEM81	0.528523	1.16432	3.27747	0.00178609	0.0352966	-1.38116
ALPP	-1.53235	-3.26155	-3.27698	0.0017887	0.0353117	-1.28125
CX3CL1	0.860681	5.9756	3.27672	0.00179005	0.0353117	-1.65846
RP11-544A12.4	0.655085	1.13725	3.27647	0.00179137	0.0353117	-1.37575
NIP7	1.01961	4.96243	3.27632	0.00179217	0.0353117	-1.61211
KIAA0930	-0.764932	6.4102	-3.27622	0.00179271	0.0353117	-1.69708
RP5-1100H13.3	2.04019	-2.38367	3.27605	0.00179362	0.0353117	-1.28339
C9orf24	-1.244	-0.794383	-3.27577	0.0017951	0.0353186	-1.33473
CYS1	1.32177	5.98662	3.27504	0.00179901	0.0353734	-1.65312
SLX4IP	0.420141	4.64275	3.27383	0.00180552	0.0354784	-1.62081
BACE1	-0.315626	6.16022	-3.2736	0.00180672	0.0354784	-1.69245
GCC2	0.517308	6.57529	3.27341	0.00180775	0.0354784	-1.69098
RP11-73E6.2	0.654545	0.797262	3.27256	0.00181237	0.0355445	-1.36846
REG3G	2.511	-1.71064	3.27236	0.00181339	0.0355445	-1.29207
MIR205HG	-2.29821	-1.51501	-3.27165	0.00181723	0.0355975	-1.33476
LINC00856	-1.48538	-1.151	-3.2712	0.00181969	0.0356136	-1.33596
TBX3	-0.87947	4.65995	-3.27108	0.00182033	0.0356136	-1.66115
CD177P1	-2.4695	-1.70907	-3.27064	0.00182272	0.035638	-1.34135
ZNF84	0.48806	5.71557	3.26892	0.00183205	0.0357981	-1.67879
RPP25	1.33376	5.23123	3.26843	0.00183469	0.0358275	-1.64041
HNRNPLL	-0.387023	5.0212	-3.26779	0.0018382	0.0358736	-1.67567
GLYATL2	1.38475	-2.43343	3.26532	0.00185172	0.0361089	-1.3097
SPNS3	0.965868	1.64678	3.26517	0.00185257	0.0361089	-1.42817
APCDD1	-1.11676	2.95616	-3.26374	0.00186044	0.036224	-1.59692
CBX3P7	-1.55608	-1.92931	-3.26368	0.00186078	0.036224	-1.33307
SH3BGRL2	0.940381	4.67808	3.26292	0.00186498	0.0362831	-1.63441
CNR1	-1.39448	2.35331	-3.26147	0.00187303	0.0364171	-1.57042
RP11-61J19.5	-0.903541	1.61149	-3.26115	0.0018748	0.0364288	-1.50703
MAGEL2	-1.7827	-0.762595	-3.26093	0.00187605	0.0364306	-1.38463
NCKAP5L	-0.595415	6.09694	-3.25982	0.00188224	0.0365206	-1.73251
PLEKHG5	-0.846338	5.35515	-3.25967	0.00188306	0.0365206	-1.71588
PNPO	0.590275	5.65178	3.25933	0.00188493	0.0365206	-1.70002
NAMA	-1.94928	-0.455462	-3.25926	0.00188535	0.0365206	-1.40699
ZNF443	0.711074	2.531	3.25804	0.0018922	0.0366037	-1.51206
ACSM2A	2.25933	7.71231	3.25788	0.00189309	0.0366037	-1.73481
BRAF	0.410402	6.81317	3.25787	0.00189315	0.0366037	-1.74128
XPR1	0.559321	5.83401	3.25748	0.00189531	0.0366228	-1.71281
C10orf62	1.11278	1.87133	3.2569	0.00189858	0.0366506	-1.4562
ARHGAP27	-0.807677	6.08344	-3.25681	0.00189909	0.0366506	-1.7435
CEACAMP6	-2.17607	-1.5758	-3.25563	0.00190573	0.036756	-1.37496
MTND5P26	0.901721	1.01429	3.2548	0.00191046	0.0368246	-1.41934
AC009502.1	-1.54716	-3.79177	-3.25436	0.00191292	0.0368494	-1.337
STIL	0.880059	2.43569	3.25379	0.00191616	0.036889	-1.51021
CCDC138	0.60266	1.7477	3.25256	0.00192319	0.0370015	-1.48012
DHRS9	-1.59688	0.318674	-3.25175	0.0019278	0.0370662	-1.46725
RP1-253B10.2	-1.55689	-3.86126	-3.25155	0.00192892	0.0370662	-1.34396
CD24P4	1.24179	3.75075	3.2512	0.00193093	0.0370821	-1.59312
RAI2	0.639893	3.77583	3.25056	0.00193459	0.0371115	-1.62452
GYLTL1B	1.38265	3.11972	3.25038	0.0019356	0.0371115	-1.54987
PHOSPHO1	-0.851129	2.25801	-3.2502	0.00193664	0.0371115	-1.57944
RP3-476K8.4	0.947837	0.330017	3.25001	0.00193774	0.0371115	-1.39682
LIPE	-0.66198	3.10572	-3.2499	0.00193839	0.0371115	-1.63239
ZNF816	0.74877	2.55558	3.24946	0.00194088	0.0371366	-1.53174
MLLT3	0.524202	4.73016	3.24821	0.00194808	0.037235	-1.69339
RHOT1P2	-1.53875	-2.83018	-3.24816	0.0019484	0.037235	-1.35591
LYL1	-0.765918	2.62998	-3.24729	0.00195339	0.0373075	-1.60928
RBKS	0.629777	2.33035	3.24701	0.00195502	0.0373158	-1.53127
FAM131C	1.48817	1.58079	3.24618	0.00195982	0.0373847	-1.45776
EFCAB6-AS1	1.22767	-1.05526	3.24554	0.00196355	0.0374331	-1.36465
FAM214A	-0.46218	6.05239	-3.24481	0.00196779	0.037491	-1.77097
CKMT2	-1.2804	3.7732	-3.24386	0.00197334	0.0375739	-1.7036
BTG3	-1.15684	2.4028	-3.24323	0.00197704	0.0376171	-1.6138
EPHA7	2.02238	4.55759	3.24306	0.00197801	0.0376171	-1.63454
LINC01193	-2.36158	-1.98246	-3.24249	0.00198136	0.0376579	-1.39815
AKR1C3	1.36704	4.90781	3.2395	0.00199897	0.0379695	-1.69787
LYG1	1.3324	0.471375	3.23888	0.00200265	0.0380163	-1.41937
RP11-183A22.3	-1.38137	-3.42739	-3.23826	0.00200631	0.0380542	-1.3775
ERC2	-1.60197	3.07159	-3.23813	0.00200708	0.0380542	-1.68717
GUCY1B3	0.933119	4.59312	3.23781	0.00200894	0.0380544	-1.70065
NEXN-AS1	-0.845596	1.32102	-3.23772	0.00200952	0.0380544	-1.5446
RP11-64P14.7	-1.02351	-0.561898	-3.23602	0.00201962	0.0382226	-1.44208
AL035610.2	1.40751	0.840928	3.23501	0.00202564	0.0383134	-1.44654
RP11-46O21.2	1.1893	-0.902271	3.23452	0.00202857	0.0383455	-1.39509
TYW5	0.556307	4.57978	3.23374	0.00203328	0.0383894	-1.72168
RP11-264L1.2	0.618693	3.24118	3.23373	0.00203334	0.0383894	-1.63163
RP11-18B3.3	0.766534	-0.0289061	3.23336	0.00203556	0.0384039	-1.42862
PKHD1	1.89174	7.65777	3.23319	0.00203658	0.0384039	-1.80667
CLEC4G	-1.45539	-2.68162	-3.23299	0.00203779	0.0384039	-1.39516
SNX18P13	-1.8883	-1.64309	-3.23106	0.00204942	0.0385998	-1.4298
BAG1	-0.621997	5.78594	-3.23052	0.00205271	0.0386385	-1.80478
IGF2BP3	-1.614	-0.465518	-3.2288	0.00206316	0.0388119	-1.4815
TMEM56	0.796781	4.23692	3.22704	0.00207387	0.03899	-1.71324
CTD-2600O9.1	1.22541	1.45607	3.22673	0.0020758	0.0389912	-1.50992
SEPN1	-0.426939	6.65984	-3.22662	0.00207642	0.0389912	-1.83389
ADAM7	1.60174	-0.0353071	3.22593	0.00208065	0.0390471	-1.42963
PBX3	-0.610218	4.76613	-3.22531	0.00208445	0.0390951	-1.78466
CTD-2373H9.3	-0.70546	3.89776	-3.22321	0.00209744	0.0393067	-1.75257
LYNX1	-0.872248	4.1252	-3.22308	0.00209825	0.0393067	-1.76884
ARSJ	0.608885	3.93384	3.22282	0.00209982	0.0393125	-1.71246
HMGN2P46	0.90953	-0.144486	3.22248	0.00210191	0.0393282	-1.45038
KANK2	-0.77085	7.88379	-3.22155	0.00210774	0.0394137	-1.87104
KCNJ11	-1.03037	2.36405	-3.22031	0.00211542	0.0395337	-1.67213
YPEL2	0.431514	6.37081	3.21965	0.00211952	0.0395662	-1.83408
FAM45A	0.543552	4.8596	3.21963	0.00211968	0.0395662	-1.77562
POLR2F	-0.445692	3.57807	-3.2187	0.0021255	0.0396511	-1.73765
PCDH8	-1.35497	-3.20037	-3.21735	0.00213398	0.0397856	-1.43018
TINCR	-2.1453	1.00486	-3.21634	0.00214033	0.0398563	-1.62091
FAM109B	-0.553288	2.98408	-3.21617	0.00214135	0.0398563	-1.70778
AC007364.1	1.51081	-0.732206	3.21614	0.00214159	0.0398563	-1.44082
GAS1	-1.05328	4.03461	-3.21563	0.00214479	0.0398787	-1.78776
ARHGAP40	3.19051	2.9117	3.21554	0.00214534	0.0398787	-1.54711
DDAH2	-0.640263	4.74914	-3.2139	0.00215574	0.0400128	-1.81682
RP11-203F10.6	1.19866	-0.138338	3.21382	0.00215625	0.0400128	-1.46515
PNPLA3	1.88005	2.2587	3.2138	0.00215639	0.0400128	-1.56701
ROR1	-0.688623	4.14365	-3.21288	0.00216221	0.0400969	-1.79221
AC007099.1	0.923586	2.2803	3.21256	0.00216423	0.0401107	-1.61053
RP11-218M22.1	-0.569492	3.46959	-3.21214	0.00216694	0.0401371	-1.75231
U2AF2	-0.507412	6.38667	-3.21127	0.00217249	0.040216	-1.87084
CCNC	0.598723	4.77575	3.21068	0.00217625	0.0402619	-1.79405
AC147651.5	1.04738	0.641531	3.21042	0.00217791	0.0402688	-1.5107
FBXO25	0.661711	6.14692	3.20974	0.00218228	0.0403257	-1.8505
CTAGE5	0.640079	5.9393	3.20881	0.00218827	0.0404066	-1.84651
MMP16	-1.58908	1.97616	-3.20866	0.00218923	0.0404066	-1.69132
CTD-2015H3.2	-1.4697	-3.47502	-3.20836	0.00219119	0.0404188	-1.45176
ZRSR2	-0.564188	2.78247	-3.20792	0.00219397	0.0404362	-1.71786
RN7SL459P	1.18868	-0.645433	3.20781	0.00219471	0.0404362	-1.46617
H6PD	-0.465932	7.39194	-3.20713	0.00219912	0.0404935	-1.90111
TMEM5	-0.551827	3.35631	-3.20632	0.00220434	0.0405657	-1.76175
SLC35F1	-0.957003	1.12645	-3.20611	0.00220571	0.0405672	-1.61872
NLK	0.528502	5.16627	3.20583	0.00220752	0.0405767	-1.82666
AGGF1P1	1.78474	-0.490523	3.20419	0.00221815	0.0407481	-1.47268
FGFR4	1.15874	5.36549	3.20395	0.00221976	0.0407537	-1.8261
EFCAB10	0.844037	-0.10303	3.20341	0.00222326	0.0407941	-1.50237
ASTN2	0.653905	3.98204	3.20289	0.00222666	0.0408182	-1.76579
TMEM38B	1.12471	3.85775	3.20281	0.00222718	0.0408182	-1.73265
PLEKHA7	0.855542	6.47316	3.20238	0.00223002	0.0408462	-1.87624
RP11-661G16.2	-0.759397	0.815829	-3.20197	0.0022327	0.0408531	-1.60147
OCLN	0.94765	4.6044	3.20179	0.00223389	0.0408531	-1.79469
GLYATL1	2.33466	3.42866	3.20172	0.00223431	0.0408531	-1.65216
PSG3	-2.70152	1.91607	-3.20138	0.00223657	0.0408705	-1.74111
HUNK	0.997091	3.3394	3.20021	0.00224424	0.0409868	-1.71369
ST8SIA5	-1.39572	1.28239	-3.19981	0.0022469	0.0409901	-1.66068
PI4KA	-0.416368	7.31541	-3.1996	0.00224828	0.0409901	-1.91994
AC092066.1	-2.14261	-2.86899	-3.19944	0.00224931	0.0409901	-1.48374
ANKRD33B-AS1	1.5018	-0.943757	3.19939	0.00224966	0.0409901	-1.4805
DNAH5	2.10198	4.55602	3.19899	0.0022523	0.0410145	-1.75699
CTD-2299I21.1	1.60227	-1.02923	3.19863	0.00225469	0.0410341	-1.48099
QPRT	1.18449	6.49974	3.19775	0.0022605	0.0411047	-1.88435
AC009878.2	-1.8703	-3.67545	-3.19765	0.0022612	0.0411047	-1.47843
NWD1	-1.46222	0.863414	-3.19621	0.00227078	0.0412545	-1.6416
TLDC1	0.36127	4.64099	3.19584	0.00227323	0.0412545	-1.83554
IGKV3D-20	-1.6666	-2.34129	-3.19582	0.00227339	0.0412545	-1.49602
FADS2	-0.805546	4.67743	-3.19423	0.00228399	0.0414228	-1.86885
CBFA2T3	-1.22446	3.29148	-3.19357	0.00228842	0.0414291	-1.81203
CLDN10-AS1	1.70243	0.273551	3.19353	0.00228869	0.0414291	-1.51862
ABTB1	-0.540604	5.42745	-3.1934	0.00228953	0.0414291	-1.89354
MYZAP	-1.30464	0.0180285	-3.19337	0.00228977	0.0414291	-1.5931
RP3-325F22.5	0.758	0.161213	3.19319	0.00229095	0.0414291	-1.5406
PPM1M	-0.595485	3.85522	-3.19178	0.00230045	0.0415738	-1.8339
RP11-1C1.6	2.51812	-1.80619	3.1915	0.00230234	0.0415738	-1.49221
RNASEK-C17orf49	-1.05806	1.46735	-3.19141	0.00230294	0.0415738	-1.68849
CUBN	2.13989	6.80431	3.19093	0.0023062	0.0416087	-1.89021
RP11-285G1.14	0.878533	-0.234328	3.18969	0.00231458	0.0417358	-1.53021
TGFBRAP1	0.471967	5.62129	3.18886	0.00232021	0.0417968	-1.89287
CCDC13	-1.21488	1.2089	-3.1888	0.00232064	0.0417968	-1.68165
SNTA1	-0.921462	5.6427	-3.18828	0.00232415	0.0418171	-1.91897
RP11-231E6.1	2.36357	1.89036	3.18824	0.00232443	0.0418171	-1.58575
NRBF2	-0.663977	3.52168	-3.18704	0.0023326	0.0419399	-1.82634
RP11-785G17.1	1.496	0.738554	3.18602	0.00233959	0.0420415	-1.56411
TSPAN14	-0.279486	6.82411	-3.18566	0.00234211	0.0420625	-1.94635
MMP24	0.83954	5.09139	3.18494	0.00234705	0.0421272	-1.87336
RP11-657O9.1	-1.31626	0.468443	-3.18411	0.00235271	0.0422045	-1.64536
BASP1P1	3.65174	1.80634	3.18322	0.00235884	0.0422683	-1.556
RP11-317J10.2	1.24122	-0.712807	3.18321	0.00235897	0.0422683	-1.52599
RP11-886D15.1	-1.39443	-3.63083	-3.18078	0.00237578	0.0425452	-1.5191
PITHD1	-0.612682	4.38893	-3.17941	0.00238529	0.0426911	-1.89376
PADI3	-2.4011	-1.63537	-3.1791	0.00238751	0.0427064	-1.57008
OR2L5	-1.7051	-2.25131	-3.17858	0.00239108	0.0427459	-1.54291
CTD-2555O16.2	0.708519	-0.0187355	3.17752	0.00239857	0.0428553	-1.57355
AC009166.7	1.18996	1.94788	3.17509	0.00241566	0.0431361	-1.67146
HHIPL1	-0.868607	2.60913	-3.17454	0.00241951	0.0431624	-1.80656
PAQR8	-0.955063	3.87007	-3.17435	0.00242083	0.0431624	-1.88795
EHBP1L1	-0.7771	6.49344	-3.17429	0.00242128	0.0431624	-1.97581
GAL3ST4	-0.763925	3.26539	-3.17318	0.00242914	0.043278	-1.85021
PALM2-AKAP2	-0.962736	5.09215	-3.17213	0.00243661	0.0433664	-1.94636
ESRRAP1	-1.28658	-2.75956	-3.17209	0.00243687	0.0433664	-1.5452
ADK	0.585688	3.85862	3.17031	0.00244962	0.0435685	-1.84957
RP11-347H15.1	-1.33364	-3.83288	-3.1687	0.00246114	0.0437484	-1.54811
RHPN1	1.04166	4.5535	3.16828	0.0024642	0.0437745	-1.88183
CH17-437K3.1	-1.20738	-0.34287	-3.16811	0.0024654	0.0437745	-1.63625
2021-03-11	-1.59156	-3.37114	-3.16779	0.00246768	0.0437901	-1.55259
LINC00504	-0.843582	-0.0250318	-3.16745	0.00247012	0.0438052	-1.64174
CDK15	-1.54674	0.752151	-3.16729	0.00247133	0.0438052	-1.71352
RASGRP1	0.575102	4.33349	3.16482	0.00248916	0.0440962	-1.8924
PLAC9	-0.831612	1.95278	-3.16393	0.00249568	0.0441789	-1.78405
MXD4	-0.461296	6.85241	-3.16379	0.00249665	0.0441789	-2.00815
EAF2	0.951694	1.67074	3.16269	0.0025047	0.0442963	-1.696
OR2A7	0.778721	3.94752	3.16242	0.00250666	0.044306	-1.86439
ANKDD1A	-0.546281	2.96428	-3.16109	0.00251645	0.0444515	-1.8537
FBXL17	-0.471912	5.66416	-3.16083	0.00251832	0.0444515	-1.98648
PALM2	-0.8347	4.56996	-3.1607	0.00251929	0.0444515	-1.95496
ENTPD1-AS1	0.350942	3.81139	3.16052	0.00252057	0.0444515	-1.87886
FRRS1L	-1.46312	-1.02028	-3.15709	0.00254593	0.0448421	-1.63306
TBC1D32	0.664685	2.91061	3.15695	0.00254699	0.0448421	-1.80633
ITIH3	-0.868308	1.3016	-3.15694	0.00254701	0.0448421	-1.7562
CLSTN2	-1.21196	5.49387	-3.15626	0.00255209	0.0449062	-2.00483
RP6-74O6.2	0.838593	1.83451	3.15601	0.00255397	0.044914	-1.72631
LINC01277	1.26384	-0.639414	3.1555	0.00255772	0.0449547	-1.59649
RTL1	-1.29082	0.61606	-3.15523	0.00255977	0.0449655	-1.72934
LINC01160	-0.899186	0.460909	-3.1541	0.00256821	0.0450884	-1.71039
CETN4P	1.13942	0.0456658	3.15379	0.00257052	0.0451036	-1.62724
CCDC8	-0.983618	4.27191	-3.15175	0.0025858	0.0453464	-1.9696
MCHR1	-1.57191	-0.628087	-3.15077	0.00259323	0.045441	-1.67237
ATP11A	-0.776683	8.33746	-3.15065	0.0025941	0.045441	-2.06736
FGGY	0.627018	3.79289	3.15019	0.00259758	0.0454765	-1.89504
FAM217B	0.499578	4.22314	3.14968	0.00260148	0.0455194	-1.92893
AC115283.1	-1.7524	-2.09003	-3.14879	0.0026082	0.0456115	-1.62136
ZNF737	0.542318	5.36313	3.1477	0.00261644	0.04573	-1.99017
RAG1	0.751278	1.88592	3.14586	0.0026305	0.0459501	-1.76128
RP11-67K19.3	0.911945	2.5649	3.14462	0.00264002	0.0460907	-1.80885
SGK3	0.530528	4.07266	3.14102	0.00266775	0.0465488	-1.93941
OR4F4	2.06009	-2.00203	3.14019	0.00267422	0.0466356	-1.61743
RP11-361D14.2	1.54739	-0.9942	3.13912	0.00268252	0.0467544	-1.62936
ST20-AS1	-0.752592	3.69492	-3.13862	0.00268645	0.0467942	-1.96974
CNTN4-AS1	1.51675	-1.72143	3.13821	0.00268962	0.0467942	-1.62494
MEIS2	-0.985138	4.92362	-3.13816	0.00269005	0.0467942	-2.03158
LINC00639	-1.02328	1.42666	-3.13806	0.00269078	0.0467942	-1.82071
OR2I1P	1.75829	2.88929	3.13653	0.00270283	0.0469775	-1.8159
RN7SL471P	-1.53381	-0.371913	-3.13578	0.00270865	0.0470272	-1.72657
RP11-317N8.5	-0.772667	0.95437	-3.13578	0.00270869	0.0470272	-1.78678
RP11-624A21.1	1.55183	3.36285	3.13531	0.00271238	0.0470397	-1.86897
AMHR2	-1.24568	-3.02411	-3.13531	0.00271241	0.0470397	-1.63311
KIAA0195	-0.508829	6.82676	-3.13431	0.00272029	0.0471288	-2.08687
CBX5	0.57806	8.0081	3.13427	0.00272056	0.0471288	-2.09725
PGM5	-0.955118	4.03734	-3.13267	0.00273326	0.0473226	-2.00944
CTB-181H17.1	0.523034	2.98741	3.13245	0.00273495	0.0473257	-1.8871
TRIML2	-1.33242	-3.28534	-3.13211	0.0027377	0.047347	-1.63958
CEACAMP11	-1.72578	-2.07221	-3.13173	0.00274073	0.0473734	-1.66577
CLCF1	0.788483	3.85475	3.13134	0.00274385	0.047401	-1.94194
C12orf49	0.989507	7.82337	3.13031	0.00275204	0.0475164	-2.09951
AC009506.1	-0.528433	2.53281	-3.12854	0.0027662	0.0477345	-1.91012
MAP7	0.848562	5.32641	3.12802	0.00277035	0.0477798	-2.03567
DGKH	0.640061	6.40251	3.1278	0.0027721	0.0477836	-2.07737
EMILIN2	-0.653484	4.6356	-3.12725	0.00277657	0.0478155	-2.04325
DLG3	-0.49479	4.89259	-3.12701	0.00277845	0.0478155	-2.05049
RAB11B	-0.528749	6.48191	-3.127	0.00277853	0.0478155	-2.09918
SAFB	-0.412226	6.07293	-3.12654	0.00278227	0.0478311	-2.08877
PDE9A	0.601424	4.13732	3.12651	0.0027825	0.0478311	-1.98228
KCNF1	3.07557	2.94393	3.12599	0.00278668	0.0478523	-1.79599
XG	-1.76517	-0.765884	-3.12598	0.00278678	0.0478523	-1.7337
ENPP5	0.92915	4.1406	3.12554	0.00279035	0.0478873	-1.97004
UBE2M	-0.571461	4.73287	-3.1244	0.00279954	0.0480159	-2.05371
ADAMTS9	0.651608	6.68748	3.12423	0.00280092	0.0480159	-2.09509
FAT1	0.710353	9.91216	3.12366	0.00280556	0.048068	-2.14554
TRIM6	0.840291	3.73929	3.12348	0.00280703	0.048068	-1.95316
OR2T10	2.82063	0.665619	3.12322	0.00280918	0.0480786	-1.68587
AC140725.8	1.88237	-2.42232	3.12299	0.00281099	0.0480834	-1.65818
AK4	1.31358	6.27445	3.12192	0.00281977	0.0481815	-2.07581
ZBTB37	0.573809	6.84914	3.12185	0.00282032	0.0481815	-2.10648
RP11-554A11.4	-1.23225	-0.730379	-3.12171	0.00282144	0.0481815	-1.73238
RP11-599B13.6	-1.5349	-0.00806652	-3.12153	0.00282289	0.0481815	-1.78322
BBOX1	2.61052	2.95791	3.12063	0.00283025	0.0482809	-1.82293
ADH6	1.71354	2.57152	3.1196	0.00283875	0.0483995	-1.83772
ASXL2	0.396332	6.97319	3.1186	0.002847	0.0485137	-2.12042
TUBB6	-0.598487	5.02278	-3.11792	0.00285254	0.0485817	-2.08191
DCAF12L1	2.58275	0.595885	3.1176	0.00285524	0.0486012	-1.70331
RP11-234K24.6	1.45287	-1.58107	3.11576	0.00287048	0.0488341	-1.68094
RP11-438F14.10	1.68809	-2.47347	3.11538	0.00287364	0.0488613	-1.67661
COL4A3	0.746992	6.46743	3.11518	0.00287525	0.0488621	-2.11134
TMEM177	0.563233	3.11482	3.11494	0.0028773	0.0488703	-1.93882
LINC01465	-0.733106	2.96587	-3.11412	0.0028841	0.0489398	-1.98553
C11orf84	-0.456273	3.64312	-3.11407	0.00288451	0.0489398	-2.02125
AMER1	0.488292	4.36201	3.11358	0.00288858	0.0489738	-2.03288
CHD7	0.347903	6.29924	3.11345	0.00288964	0.0489738	-2.11796
DCAF4	0.439416	3.12581	3.11317	0.00289199	0.0489869	-1.95227
CXCL14	1.7835	6.35391	3.11155	0.0029056	0.0491909	-2.09527
ZYG11AP1	-2.13746	-1.63736	-3.11094	0.00291076	0.0492516	-1.74057
MAGI3	-0.53775	5.13969	-3.10987	0.00291975	0.049377	-2.10724
C16orf87	0.590696	3.06088	3.10912	0.00292604	0.0494567	-1.95183
TMEM150B	-1.26851	0.7688	-3.10881	0.0029287	0.0494749	-1.86173
GPIHBP1	-1.63651	4.57102	-3.10852	0.00293112	0.0494812	-2.10841
CST2	-3.0161	-0.763946	-3.10839	0.00293223	0.0494812	-1.80741
SLC15A1	1.42279	3.92317	3.10739	0.00294069	0.0495972	-1.98089
KIAA1211L	-0.821118	2.97163	-3.10694	0.00294452	0.0496123	-2.00816
TMEM185B	-0.391374	5.43481	-3.10692	0.00294475	0.0496123	-2.12187
RP11-131L12.3	1.0679	-1.23001	3.10654	0.00294796	0.0496396	-1.70929
KRT6B	-1.37011	-3.32999	-3.10574	0.00295475	0.0497251	-1.70354
INO80D	0.54134	6.95931	3.10557	0.00295622	0.0497251	-2.15297
BTBD7	0.560802	6.43429	3.10368	0.00297235	0.0499669	-2.14351
RP5-1021I20.2	1.55997	-1.92448	3.10326	0.00297596	0.0499669	-1.70839
ADCYAP1R1	-1.37809	-1.09921	-3.10308	0.00297751	0.0499669	-1.76609
NRXN2	-0.896965	4.1415	-3.10275	0.0029804	0.0499669	-2.09291
AC004069.1	1.66546	-2.55136	3.10268	0.00298095	0.0499669	-1.70693
CD99	-0.571007	4.7792	-3.10259	0.00298172	0.0499669	-2.11304
RBM17P1	1.10736	-1.23925	3.10259	0.00298176	0.0499669	-1.71847
RP1-187B23.1	-1.00081	2.19304	-3.1022	0.00298514	0.0499968	-1.96937
UGT1A1	2.05811	3.61365	3.10154	0.0029908	0.050041	-1.93873
RP11-519G16.5	1.64938	-0.357515	3.10152	0.00299098	0.050041	-1.7324
TXNDC9	0.765839	3.32201	3.10116	0.00299407	0.050066	-1.98262
RP11-81K2.2	-1.48104	-1.75374	-3.10077	0.00299746	0.0500959	-1.74821
TPBGL	-1.06918	-0.84816	-3.10027	0.00300176	0.050141	-1.77855
GJB6	-1.2203	-3.63186	-3.09845	0.00301755	0.0503422	-1.71896
SNRNP35	-0.400691	3.45198	-3.09833	0.00301856	0.0503422	-2.04807
C3orf18	-0.583751	3.66541	-3.09818	0.0030199	0.0503422	-2.07015
SPATA4	1.1602	-1.2147	3.09814	0.00302024	0.0503422	-1.72956
FAM111A	0.398926	6.2317	3.09765	0.00302451	0.0503865	-2.15699
PRICKLE2	0.596099	6.97795	3.09673	0.00303256	0.0504938	-2.17603
GLRA3	-1.73338	-2.83219	-3.09628	0.00303648	0.0505321	-1.73384
CNTNAP3B	0.943979	4.95585	3.09563	0.00304215	0.0505735	-2.09928
CTD-2619J13.5	-0.92284	0.335545	-3.09563	0.0030422	0.0505735	-1.85389
RP11-328C8.4	1.14184	0.651552	3.09426	0.00305418	0.0507457	-1.80535
KRT18	1.00387	5.1331	3.09362	0.00305985	0.0507986	-2.11205
SLC22A4	0.626455	2.50035	3.09344	0.0030614	0.0507986	-1.94817
C1QB	-1.10337	5.61484	-3.09328	0.00306285	0.0507986	-2.17408
GRK4	-0.558497	3.12043	-3.09317	0.00306385	0.0507986	-2.0435
OR2A42	0.77395	4.20786	3.0928	0.00306712	0.0508259	-2.06695
RP11-436H11.5	0.962316	0.000311342	3.09235	0.00307109	0.0508647	-1.78322
RP11-205M3.3	1.87008	-0.443013	3.09146	0.00307891	0.0509487	-1.75314
TUBD1	0.496784	2.49151	3.09127	0.00308067	0.0509487	-1.95578
RAB27A	-1.21219	4.68711	-3.09116	0.0030816	0.0509487	-2.15029
TCEAL3	-0.544809	3.90431	-3.09104	0.00308267	0.0509487	-2.10088
RP11-250B2.5	0.961024	0.839372	3.09041	0.00308826	0.0510141	-1.83279
PRDX3P4	0.821136	2.11487	3.09008	0.00309121	0.051036	-1.91823
VTN	-1.26019	1.63377	-3.08907	0.00310016	0.0511567	-1.97515
SMPD1	-0.654748	5.63425	-3.08864	0.00310405	0.0511939	-2.18042
RP11-261B23.2	2.14454	-1.12118	3.08787	0.00311088	0.0512795	-1.7507
INTU	0.566549	5.36503	3.0873	0.00311603	0.0513374	-2.151
NTF3	-1.18759	0.469548	-3.08664	0.00312192	0.0513933	-1.894
RPL5P1	-1.14165	-0.560221	-3.08656	0.0031227	0.0513933	-1.82906
LINC00839	1.01421	1.40433	3.08544	0.00313278	0.051532	-1.8823
NCDN	-0.579374	5.04219	-3.08449	0.00314134	0.05164	-2.1707
TEAD3	-0.571429	4.88993	-3.08424	0.00314356	0.05164	-2.16504
AC008103.4	-1.2196	-3.8248	-3.08416	0.00314429	0.05164	-1.75251
ATF4	-0.412209	6.59982	-3.08346	0.00315065	0.0517138	-2.21568
TENM3	-1.25043	4.59554	-3.0833	0.00315209	0.0517138	-2.16712
RP11-1035H13.3	-1.79684	-3.27693	-3.08268	0.00315767	0.0517781	-1.76175
MBP	-0.657872	7.75321	-3.08236	0.00316064	0.0517997	-2.24136
LINC01168	-1.79404	-1.97831	-3.08162	0.00316733	0.0518822	-1.791
GLB1L2	0.795879	4.4932	3.0814	0.00316937	0.0518885	-2.11802
LRRTM1	-1.69013	-0.507142	-3.0806	0.00317667	0.0519808	-1.86498
SPATA31C1	-1.80732	-1.83814	-3.08028	0.00317955	0.0520007	-1.80232
PARD6A	0.799937	1.194	3.07962	0.00318556	0.0520537	-1.88983
PPFIA1	-0.318567	6.48172	-3.07956	0.00318616	0.0520537	-2.22181
RP11-754B17.1	0.651335	1.13647	3.07938	0.00318778	0.0520537	-1.89108
AGAP10	0.6704	5.82753	3.07892	0.00319198	0.0520952	-2.18723
ABHD12	-0.636188	5.53425	-3.07825	0.00319811	0.0521181	-2.20434
DLG4	-0.860818	4.10106	-3.07825	0.00319815	0.0521181	-2.153
RPS2P32	-0.784235	0.245556	-3.07818	0.00319876	0.0521181	-1.88676
RP11-411K7.1	1.14173	-1.46272	3.07804	0.00320005	0.0521181	-1.77533
MMP14	-0.750094	8.23193	-3.07744	0.00320559	0.0521813	-2.26055
ADPRH	-0.523745	3.85029	-3.07701	0.00320952	0.0521834	-2.13339
BCKDHB	0.634017	4.29056	3.07694	0.00321016	0.0521834	-2.11969
WAS	-0.853997	3.01623	-3.07688	0.00321072	0.0521834	-2.09236
ZNF555	0.434127	3.95842	3.07559	0.0032227	0.0523324	-2.10893
CTA-242H14.1	-1.19918	-3.90678	-3.07553	0.00322323	0.0523324	-1.77276
AC006019.3	-1.47555	3.6954	-3.07491	0.00322894	0.0523979	-2.15444
RN7SKP45	-1.78835	-2.62499	-3.07445	0.00323322	0.0524402	-1.7929
NFIB	0.60822	7.61648	3.0742	0.00323551	0.0524501	-2.24875
2021-03-05	-0.421107	4.80052	-3.07278	0.00324875	0.0526374	-2.18962
CD33	-0.854196	2.73571	-3.07234	0.00325282	0.0526626	-2.08181
DDX18P5	0.786235	1.97308	3.07197	0.00325628	0.0526626	-1.95704
WDR17	0.928416	2.57874	3.07188	0.00325714	0.0526626	-1.99869
AGGF1P2	1.05447	1.14899	3.07174	0.00325842	0.0526626	-1.89569
UGT1A7	2.80467	2.18861	3.07146	0.00326112	0.0526626	-1.88971
ZNF300	0.623917	3.21148	3.07142	0.00326143	0.0526626	-2.057
RP11-796G6.1	1.00472	-0.650747	3.07135	0.00326208	0.0526626	-1.80821
NDRG4	-1.86812	5.33322	-3.07101	0.00326531	0.0526876	-2.23439
AC003682.17	-1.61562	-2.54176	-3.07035	0.0032715	0.0527604	-1.80116
NFIC	-0.463174	7.88209	-3.06982	0.00327648	0.0528134	-2.27474
CBX1P2	1.55527	-1.75303	3.06884	0.00328571	0.0529349	-1.79259
MYLK4	0.869574	2.06926	3.06849	0.00328898	0.0529603	-1.97156
KIAA1549	0.627928	5.71985	3.06767	0.00329669	0.0530572	-2.21369
ETS2	-0.569492	5.94155	-3.0672	0.00330118	0.0531022	-2.24435
RP11-173G21.1	0.69792	0.955279	3.06641	0.00330863	0.0531946	-1.91274
NABP1	-0.857233	7.28992	-3.0661	0.00331157	0.0531969	-2.27882
RP11-103C16.2	1.57135	-1.66392	3.06604	0.00331217	0.0531969	-1.80019
ANP32B	-0.524041	5.35524	-3.06337	0.00333757	0.0535774	-2.23688
PSG6	-2.33573	2.26287	-3.06309	0.00334031	0.0535938	-2.12011
ARHGAP32	0.52911	6.01598	3.0615	0.00335555	0.0538108	-2.24262
CPN1	2.1741	-0.596664	3.06119	0.00335851	0.0538308	-1.8215
CCP110	0.529784	4.53508	3.06052	0.00336495	0.0539063	-2.17936
TIMM23B	-0.715491	1.83178	-3.06029	0.00336716	0.0539083	-2.04125
HK3	-1.1398	2.17471	-3.06003	0.00336966	0.0539083	-2.08496
RP1-172N19.5	0.789636	0.690834	3.05997	0.00337024	0.0539083	-1.90655
MAGEF1	-0.638056	4.81747	-3.05911	0.00337853	0.0539637	-2.22998
AC007461.2	1.57254	-1.5244	3.05911	0.00337857	0.0539637	-1.81797
AC008991.1	-1.78612	0.873528	-3.0589	0.00338056	0.0539637	-2.0104
ZDHHC6	0.441107	4.58464	3.0589	0.0033806	0.0539637	-2.19105
ACTR3C	0.752774	4.8915	3.05844	0.00338501	0.0539791	-2.19891
CTD-2326C4.1	-0.788888	-0.58205	-3.05822	0.00338718	0.0539791	-1.88987
PPP4R1L	0.46913	4.25094	3.05812	0.0033881	0.0539791	-2.17476
NEIL2	-0.423309	3.73195	-3.05809	0.00338846	0.0539791	-2.17235
ZNF790	0.495295	3.89767	3.05779	0.0033913	0.0539966	-2.14753
ABCA5	0.636285	5.86	3.05762	0.003393	0.0539966	-2.24562
UNC50	-0.341378	4.42824	-3.05671	0.00340185	0.0541098	-2.21273
RP1-272L16.1	-1.38768	-3.45977	-3.05652	0.00340363	0.0541107	-1.82132
CTA-268H5.14	-1.21558	-2.47258	-3.05544	0.00341416	0.0542505	-1.83357
LMBR1L	-0.456233	5.0657	-3.05433	0.00342506	0.0543961	-2.24731
PPP3R1	-0.539545	5.56306	-3.05217	0.0034463	0.0547056	-2.2722
AC034220.3	0.673186	4.07501	3.05173	0.00345064	0.0547197	-2.16932
ZBTB20-AS1	0.852243	2.71302	3.05172	0.00345068	0.0547197	-2.06106
WNT3	-0.797715	1.7729	-3.05038	0.00346397	0.0549026	-2.06312
RP5-1074L1.4	0.79235	4.27081	3.04977	0.00346998	0.05497	-2.1808
LOXL3	-0.598148	3.01914	-3.04929	0.00347475	0.0550178	-2.15281
RP11-8L18.2	0.867121	1.45761	3.04871	0.00348056	0.0550819	-1.97711
FKBP8	-0.645794	6.87666	-3.04777	0.00348985	0.055201	-2.31767
AGXT2	2.64973	3.5614	3.047	0.0034975	0.055294	-2.05232
ARSG	-0.477438	4.41922	-3.04641	0.00350345	0.0553472	-2.23989
RP5-855D21.1	0.777619	1.17638	3.04631	0.00350439	0.0553472	-1.97268
CHUK	0.510201	4.64288	3.04613	0.00350621	0.0553479	-2.22663
PGLYRP2	-1.33349	-2.53054	-3.04506	0.00351696	0.0554896	-1.85948
HRAS	-0.537175	3.58876	-3.0445	0.0035226	0.0555506	-2.20323
IFT80	0.594472	4.8623	3.04406	0.00352697	0.0555916	-2.23796
PHLDA3	-0.821176	5.11336	-3.04381	0.00352949	0.0556033	-2.28425
ZNF441	0.654406	4.443	3.04313	0.00353642	0.0556266	-2.21587
RP11-382J12.1	0.85498	2.66844	3.04308	0.00353688	0.0556266	-2.07702
ZNF10	0.571984	4.22711	3.04285	0.00353925	0.0556266	-2.2062
RTTN	-0.825948	5.35611	-3.04282	0.00353952	0.0556266	-2.29454
CYP11B1	-1.43339	-3.15714	-3.04279	0.00353986	0.0556266	-1.85692
OLFML2A	-1.24586	5.50891	-3.04241	0.0035437	0.055659	-2.30575
RP11-46I1.2	-1.02735	-0.5572	-3.0415	0.00355289	0.0557718	-1.93923
UGT2B11	1.38348	0.28986	3.04135	0.00355444	0.0557718	-1.9128
ZDHHC3	-0.460479	6.45486	-3.04108	0.00355716	0.0557865	-2.32405
SLFNL1	0.999639	4.04151	3.03948	0.00357341	0.0559976	-2.18449
NAV2	-0.759707	6.8696	-3.03927	0.00357559	0.0559976	-2.34089
RP11-210M15.2	1.17605	3.76908	3.03923	0.00357599	0.0559976	-2.15648
[truncated: 29,304 more rows]

## Sheet: NMF_Cluster_2_DEGenes
GeneSymbol	logFC	AveExpr	t	P.Value	adj.P.Val	B
TMEM207	-3.87234	-1.38734	-7.30583	9.79309e-10	3.06553e-05	11.6997
HRG	-3.92467	-0.628104	-6.92867	4.16622e-09	6.34021e-05	10.4861
HEPACAM2	-3.36835	-0.89173	-6.82872	6.11184e-09	6.34021e-05	10.0747
GP2	-4.20177	0.585248	-6.69851	1.00636e-08	6.34021e-05	9.78474
RP11-517M22.1	-3.29682	-2.0435	-6.68333	1.06657e-08	6.34021e-05	9.40302
SYT10	-2.55715	-1.09743	-6.64921	1.21526e-08	6.34021e-05	9.36617
KCNJ10	-2.73493	2.81498	-6.59579	1.49066e-08	6.66602e-05	9.46103
RP11-317M11.1	-3.33281	-1.80936	-6.50692	2.09314e-08	7.4601e-05	8.83999
RPP40P2	-2.68306	-2.3478	-6.48054	2.31482e-08	7.4601e-05	8.59612
AFM	-3.81607	0.496612	-6.47291	2.38319e-08	7.4601e-05	8.9685
CTD-2342N23.1	-2.78919	-0.649175	-6.35014	3.80471e-08	9.70836e-05	8.40828
EGF	-3.04907	4.36213	-6.34398	3.89499e-08	9.70836e-05	8.543
SLC22A7	-3.90569	0.683671	-6.31844	4.29244e-08	9.70836e-05	8.42662
MUC15	-2.96255	0.849918	-6.31542	4.34198e-08	9.70836e-05	8.40736
FGF9	-2.75458	1.89568	-6.28909	4.79918e-08	0.000100153	8.3418
ACPP	-2.48653	1.80032	-6.254	5.4835e-08	0.000107281	8.21261
KNG1	-4.34487	3.24825	-6.22074	6.22169e-08	0.000111121	8.09942
HPD	-3.1629	1.26007	-6.20249	6.66785e-08	0.000111121	8.02261
BSND	-3.48472	0.87665	-6.19946	6.74474e-08	0.000111121	8.00353
ATP6V1G3	-3.11068	-1.70264	-6.1708	7.519e-08	0.000113866	7.69213
CLDN16	-3.23089	1.74073	-6.16663	7.63882e-08	0.000113866	7.90246
NELL1	-3.107	-0.0986442	-6.12095	9.08207e-08	0.000125507	7.67113
CYP4A11	-4.09926	2.11179	-6.11307	9.35696e-08	0.000125507	7.71342
RPS24P17	-3.72913	-0.975766	-6.09601	9.9808e-08	0.000125507	7.53689
FABP1	-3.39974	-1.31299	-6.09488	1.00236e-07	0.000125507	7.49184
KCNJ1	-3.82688	2.99651	-6.07015	1.10063e-07	0.000131325	7.55677
G6PC	-3.91363	1.27936	-6.06255	1.13273e-07	0.000131325	7.52791
TMEM52B	-3.75506	2.75228	-6.00401	1.41295e-07	0.000156113	7.32023
OR6B1	-2.36729	-2.10681	-5.99784	1.44627e-07	0.000156113	6.9961
LINC01230	-3.31562	-0.461493	-5.98509	1.51749e-07	0.00015834	7.17798
SLC7A13	-3.42868	-1.38291	-5.96326	1.64764e-07	0.000166029	7.03553
RP11-690G19.4	-3.08945	-1.05095	-5.95106	1.72515e-07	0.000166029	7.00473
UNC13C	-2.58868	0.528153	-5.94459	1.76774e-07	0.000166029	7.07804
RP11-622A1.2	-3.30338	-1.45706	-5.9393	1.80333e-07	0.000166029	6.94247
TMEM174	-3.27425	0.457421	-5.89997	2.091e-07	0.000178413	6.93026
SLC4A1	-3.55163	2.16355	-5.89946	2.09503e-07	0.000178413	6.94875
CLDN8	-3.79989	0.462273	-5.89406	2.13798e-07	0.000178413	6.91558
IYD	-3.05086	1.28717	-5.88777	2.18918e-07	0.000178413	6.90408
LINC00885	-2.48806	-1.18746	-5.88371	2.22283e-07	0.000178413	6.73396
LINC01187	-4.01012	0.805413	-5.87265	2.31716e-07	0.000178788	6.84856
CALB1	-2.89101	3.03804	-5.86985	2.34173e-07	0.000178788	6.83869
SERPINA5	-3.32734	2.42716	-5.84047	2.61486e-07	0.000194888	6.7374
RP4-753M9.1	-2.33962	-0.702439	-5.80432	2.9946e-07	0.000218	6.50383
CLDN19	-3.14542	2.13114	-5.78867	3.17552e-07	0.00021894	6.55522
RP4-655J12.4	-2.69701	-0.791954	-5.78678	3.19807e-07	0.00021894	6.44997
PIK3C2G	-3.62024	0.861699	-5.78518	3.21734e-07	0.00021894	6.53945
RP4-568C11.4	-2.79768	-0.384904	-5.76202	3.50882e-07	0.000233695	6.39942
ALB	-2.86255	0.199214	-5.75608	3.58766e-07	0.000233968	6.41245
RANBP3L	-2.35614	1.58662	-5.73728	3.84904e-07	0.000245891	6.37351
TMEM213	-4.02994	2.7586	-5.72844	3.97842e-07	0.000249073	6.33464
FOXI1	-3.58384	0.387937	-5.72071	4.0951e-07	0.000251351	6.3044
TFAP2B	-3.43538	1.37925	-5.7149	4.18497e-07	0.000251927	6.29564
UQCRFS1P2	-2.36117	-2.53922	-5.69017	4.58982e-07	0.000271085	5.91366
SCNN1G	-4.19626	1.51526	-5.67898	4.78567e-07	0.000277418	6.16866
CRHBP	-2.26325	0.779635	-5.6612	5.11367e-07	0.000291042	6.09373
FXYD4	-3.74758	0.257335	-5.64756	5.38048e-07	0.000295541	6.04814
CA10	-3.27318	-0.457127	-5.64676	5.39657e-07	0.000295541	6.01168
ATP12A	-3.25559	-0.715393	-5.63873	5.5604e-07	0.000295541	5.96926
ESRRB	-2.07287	2.22039	-5.63825	5.57038e-07	0.000295541	6.02547
DPEP1	-2.77994	2.45501	-5.62684	5.81216e-07	0.00030323	5.9808
MYO3B	-3.05111	1.31071	-5.62233	5.91062e-07	0.000303312	5.97033
ATP6V1B1-AS1	-2.30346	-0.932874	-5.61699	6.02921e-07	0.000304407	5.84822
F11	-2.83627	0.386498	-5.59954	6.43376e-07	0.000319676	5.87677
MFSD4	-1.85445	4.28059	-5.57379	7.07989e-07	0.000336963	5.77284
CYP4F2	-3.45664	-0.747675	-5.57265	7.10981e-07	0.000336963	5.74911
RP11-734K21.5	-2.31338	-2.37674	-5.5686	7.21758e-07	0.000336963	5.53554
GGT6	-2.95316	1.54026	-5.56488	7.31821e-07	0.000336963	5.76933
CLCNKB	-4.06325	2.8639	-5.55895	7.48098e-07	0.000336963	5.7326
LINC00882	-1.79155	1.05382	-5.55645	7.5509e-07	0.000336963	5.73191
ALDOB	-4.37298	4.29544	-5.55454	7.60459e-07	0.000336963	5.69642
GSTM3	-1.59685	4.36785	-5.55319	7.64284e-07	0.000336963	5.7001
ZYG11A	-2.26315	0.232705	-5.54678	7.82678e-07	0.00034028	5.68096
ATP6V1B1	-2.78639	2.46092	-5.51815	8.70324e-07	0.000372209	5.59844
PLG	-3.65415	1.45206	-5.5152	8.79899e-07	0.000372209	5.59498
ATP6V0D2	-2.81109	1.86428	-5.50525	9.12942e-07	0.000381038	5.55944
RP11-573D15.8	-2.11003	0.575589	-5.50121	9.267e-07	0.00038169	5.53312
SLC4A9	-3.15789	2.04277	-5.46349	1.06549e-06	0.000433155	5.41049
SLC30A8	-2.75407	-1.09963	-5.44871	1.12532e-06	0.000451614	5.29114
CLNK	-2.25109	1.25576	-5.43799	1.17074e-06	0.000463895	5.32816
SLC12A3	-4.65216	3.63565	-5.43081	1.20219e-06	0.000470401	5.26843
CH507-396I9.3	-2.01147	0.3858	-5.42534	1.22669e-06	0.000474065	5.26833
RP11-469H8.6	-2.76352	-1.5478	-5.41979	1.2521e-06	0.000477981	5.16201
SLC22A8	-3.92539	2.85696	-5.40887	1.30355e-06	0.0004879	5.20516
RP11-459D22.1	-2.11394	-2.68726	-5.40768	1.30925e-06	0.0004879	4.95497
AC007040.11	-2.1586	1.14402	-5.39703	1.36168e-06	0.00049703	5.1861
DMRT2	-2.93069	1.36279	-5.39586	1.36759e-06	0.00049703	5.18247
AQP6	-3.11148	1.78025	-5.39312	1.38144e-06	0.00049703	5.16858
HNF4A-AS1	-2.79984	-1.80596	-5.38697	1.41308e-06	0.00049703	5.0367
CASR	-3.18404	3.45193	-5.38696	1.41314e-06	0.00049703	5.12136
GPR98	-2.49642	1.9419	-5.38	1.44981e-06	0.000504262	5.12409
GSTA2	-3.3318	-0.136794	-5.37666	1.46775e-06	0.00050489	5.10441
UMOD	-5.13923	5.20481	-5.37296	1.48788e-06	0.000506253	5.04271
SLC26A4	-2.45725	0.64062	-5.36349	1.54068e-06	0.000514255	5.0673
CHRNA4	-3.56814	1.04976	-5.36258	1.54581e-06	0.000514255	5.06769
NPHS2	-3.89164	1.0089	-5.35988	1.56123e-06	0.000514255	5.0581
RP11-133K1.8	-2.31299	-1.46611	-5.35713	1.57712e-06	0.000514255	4.93989
RP11-261N11.8	-3.53173	-0.52444	-5.34065	1.6756e-06	0.000540736	4.97171
PRR15L	-1.76409	1.75261	-5.33619	1.70332e-06	0.000544072	4.97697
PLA2G4F	-2.60993	2.05052	-5.33278	1.72479e-06	0.000545365	4.95785
LINC01055	-2.9708	-1.17907	-5.3261	1.76764e-06	0.000553323	4.8822
SOST	-2.99296	-0.822586	-5.31896	1.81454e-06	0.000562381	4.8769
SLC12A1	-4.11305	6.37148	-5.31332	1.85247e-06	0.000568005	4.82377
OR2T11	-2.94873	1.26106	-5.30606	1.9025e-06	0.000568005	4.87311
SOSTDC1	-2.48902	0.53865	-5.30498	1.91004e-06	0.000568005	4.86677
GRHL2	-2.81529	1.53815	-5.30409	1.91628e-06	0.000568005	4.86429
AQP2	-4.9758	3.95074	-5.30308	1.92341e-06	0.000568005	4.81484
SCNN1B	-2.89732	0.847189	-5.29484	1.98239e-06	0.000579952	4.8358
CTD-2008P7.9	-2.75486	-0.993448	-5.27203	2.15514e-06	0.000624651	4.70658
ENTPD3	-1.2055	1.66955	-5.26934	2.17651e-06	0.000625057	4.74861
RP5-881L22.5	-2.57104	-2.46393	-5.26417	2.21807e-06	0.000631203	4.56425
CAPN13	-1.89227	0.687192	-5.24381	2.38956e-06	0.000673876	4.65714
PAPPA2	-2.77466	3.76164	-5.23994	2.42356e-06	0.000677364	4.6039
AC074286.1	-1.64273	4.11099	-5.2317	2.4977e-06	0.000691907	4.57559
SLC6A19	-3.32245	2.86648	-5.20788	2.72459e-06	0.000741761	4.507
MT1H	-2.99947	0.634264	-5.20783	2.72506e-06	0.000741761	4.53892
CTD-2515H24.2	-2.52086	0.619733	-5.19857	2.81864e-06	0.00076062	4.50653
NACAP3	-2.19607	-2.39258	-5.19491	2.85651e-06	0.000764251	4.32022
FPGT-TNNI3K	-1.1445	1.82139	-5.17625	3.05752e-06	0.000811098	4.43086
ATP6V0A4	-3.51422	2.26818	-5.16253	3.21404e-06	0.000835212	4.3615
TCL6	-2.48977	1.37966	-5.16222	3.21777e-06	0.000835212	4.38135
PROM2	-2.43468	3.93925	-5.1613	3.22846e-06	0.000835212	4.32971
B4GALNT2	-2.66083	1.11323	-5.15729	3.27593e-06	0.000836893	4.3664
CTXN3	-3.00796	-1.42002	-5.15624	3.28843e-06	0.000836893	4.31048
TFCP2L1	-1.44511	6.81269	-5.14562	3.4179e-06	0.000857591	4.2404
RP1-301L19.1	-2.34904	-0.238	-5.14509	3.42456e-06	0.000857591	4.30901
XPNPEP2	-3.08613	1.79783	-5.14008	3.48746e-06	0.000866412	4.29513
RP11-643A5.3	-2.394	-1.18073	-5.1132	3.84503e-06	0.000947725	4.16354
FAM3B	-2.30316	-0.801406	-5.10759	3.92399e-06	0.000959631	4.16251
SCNN1A	-2.70113	4.59444	-5.1042	3.97262e-06	0.00096399	4.11899
INPP5J	-1.93922	3.06408	-5.1014	4.01314e-06	0.000966334	4.14544
CALML3-AS1	-2.60127	-0.993517	-5.09769	4.06742e-06	0.000971928	4.12761
ELF5	-2.56956	0.168935	-5.09107	4.16618e-06	0.000987984	4.14066
RP11-361H10.5	-1.68653	-0.230225	-5.08752	4.2202e-06	0.00099327	4.10796
SLC26A7	-3.08156	2.69414	-5.07912	4.35052e-06	0.0010163	4.06833
ATP1A1-AS1	-0.912018	2.91313	-5.07309	4.44653e-06	0.00103104	4.06394
AC103563.9	-2.23713	-1.26704	-5.06808	4.5279e-06	0.0010372	4.0051
SLC9A4	-2.91044	0.621773	-5.06738	4.53937e-06	0.0010372	4.06417
ASB15	-2.54634	-1.32135	-5.05419	4.76118e-06	0.00108	3.96867
CNTNAP5	-2.09536	-2.04814	-5.04573	4.90902e-06	0.00110552	3.87232
CALML3	-3.10289	-1.52379	-5.04148	4.98481e-06	0.00111457	3.93218
AC012594.1	-2.50525	-2.00071	-5.0287	5.22025e-06	0.00115893	3.84169
OR2T10	-2.94803	0.665619	-5.01408	5.50293e-06	0.00121309	3.88501
CLCNKA	-2.39805	2.87602	-5.00082	5.77227e-06	0.00125637	3.80215
CYP4A22	-2.2001	0.895096	-5.00042	5.78062e-06	0.00125637	3.83972
LINC00982	-3.32313	3.97037	-4.99733	5.84537e-06	0.00125637	3.7608
PTH1R	-2.25239	4.5269	-4.99665	5.85981e-06	0.00125637	3.75284
CFAP70	-1.12222	4.16405	-4.98736	6.05916e-06	0.00129027	3.73703
ERVMER34-1	-1.65408	0.220721	-4.98101	6.19906e-06	0.00131114	3.76906
PCK1	-3.05847	4.6631	-4.96978	6.4547e-06	0.00135605	3.65354
PTPRQ	-2.50672	0.846475	-4.96407	6.58851e-06	0.00137493	3.71761
CTD-3080P12.3	-2.66555	-0.642982	-4.95703	6.75722e-06	0.0014008	3.68126
RBBP8NL	-2.36342	-1.86093	-4.95324	6.84982e-06	0.00141066	3.60388
HMGCS2	-3.31076	1.2446	-4.94626	7.02383e-06	0.00143532	3.6464
TMEM178A	-1.65488	2.40811	-4.94477	7.06128e-06	0.00143532	3.6324
RP11-22C11.2	-2.11819	-1.90302	-4.94253	7.1184e-06	0.00143759	3.55631
SLC5A1	-2.17992	-0.0382455	-4.92892	7.47456e-06	0.00149985	3.59743
ANGPTL3	-1.54281	1.55182	-4.92452	7.5934e-06	0.00151399	3.58243
CLMN	-1.12436	6.5944	-4.91964	7.72718e-06	0.00153091	3.46537
CA8	-2.20119	0.862363	-4.90943	8.01522e-06	0.00157799	3.53649
PRRG2	-1.49684	0.304473	-4.89601	8.4094e-06	0.00163959	3.48951
RP1-80N2.2	-2.10257	-2.10659	-4.89523	8.43289e-06	0.00163959	3.38808
RP11-513O17.2	-2.57603	1.62981	-4.88641	8.70327e-06	0.00167624	3.44484
F11-AS1	-2.26755	-0.708249	-4.8856	8.72844e-06	0.00167624	3.44055
LINC01544	-1.44679	-0.237882	-4.88096	8.87439e-06	0.00169387	3.42771
GABRA2	-2.76981	1.34914	-4.86815	9.29002e-06	0.00176246	3.38883
TMEM45B	-1.59756	1.40639	-4.85529	9.72625e-06	0.0018341	3.35444
TMEM72	-2.59127	3.56958	-4.85026	9.90219e-06	0.0018561	3.27253
SVOPL	-2.235	0.0816574	-4.84799	9.98285e-06	0.00186008	3.33373
CYP4F3	-2.87142	1.73374	-4.84095	1.02366e-05	0.00189607	3.28654
PCSK2	-2.14977	-2.45021	-4.83861	1.03222e-05	0.00190068	3.18605
GPR110	-2.80272	3.11438	-4.83228	1.05573e-05	0.00193261	3.22163
GATA3-AS1	-2.83104	-0.0057383	-4.82889	1.06856e-05	0.00194472	3.27224
APCDD1L-AS1	-1.65925	0.627171	-4.81413	1.12619e-05	0.00203032	3.22409
AC008269.2	-1.73348	-1.67788	-4.81354	1.12857e-05	0.00203032	3.1481
RP11-879F14.1	-1.93889	-2.76396	-4.79989	1.18467e-05	0.00211907	3.02733
FER1L6	-2.2429	-0.713338	-4.78887	1.23195e-05	0.00219112	3.1284
GAD1	-2.03388	0.920925	-4.77864	1.2775e-05	0.0022593	3.10471
AGTR1	-1.59268	1.80618	-4.76658	1.33332e-05	0.00234478	3.05274
GPC5-IT1	-2.24316	-2.27822	-4.76424	1.34441e-05	0.00235106	2.97483
DUSP9	-2.84526	2.35562	-4.7624	1.35322e-05	0.00235332	3.00843
RP11-386B13.4	-2.5106	-1.74364	-4.75983	1.3656e-05	0.00236173	3.00215
VIL1	-1.90277	1.70291	-4.75705	1.37909e-05	0.00237197	3.01912
RP11-94C24.13	-2.27405	0.356855	-4.73849	1.47271e-05	0.00251913	2.97704
OSGIN1	1.47821	4.19384	4.73658	1.48272e-05	0.00252248	2.93718
FOLR3	-2.14622	-1.65698	-4.72729	1.53219e-05	0.00258594	2.89258
LINC00955	-2.80803	-0.990417	-4.72649	1.53655e-05	0.00258594	2.92798
RP11-885L14.1	-1.94151	-0.626189	-4.71774	1.58476e-05	0.00263756	2.89883
ADAMTS9-AS2	-0.983405	5.42512	-4.71531	1.59841e-05	0.00263756	2.79217
NDNF	-2.54664	1.87076	-4.71512	1.59949e-05	0.00263756	2.8668
C1orf116	-2.02501	1.94843	-4.71414	1.605e-05	0.00263756	2.86912
WNK4	-2.02297	4.00296	-4.71338	1.60934e-05	0.00263756	2.80725
PIPOX	-1.57876	1.98657	-4.70412	1.66281e-05	0.00270788	2.84062
UPB1	-1.96284	2.18248	-4.70174	1.67679e-05	0.00270788	2.82282
NPNT	-1.53143	4.84275	-4.7015	1.67821e-05	0.00270788	2.75136
FUT3	-1.86959	0.836395	-4.69902	1.69298e-05	0.00271772	2.84595
TMPRSS2	-2.30956	2.95054	-4.69428	1.72148e-05	0.00274685	2.76913
CTD-2515H24.1	-2.13188	-1.4879	-4.69236	1.73314e-05	0.00274685	2.79108
VN1R51P	-2.02112	-1.5433	-4.6912	1.74028e-05	0.00274685	2.78261
DIO1	-1.67603	2.00442	-4.69023	1.74623e-05	0.00274685	2.79332
AOC1	-2.32688	3.26412	-4.68541	1.77611e-05	0.00277989	2.7305
AKR1B1P4	-1.98927	-3.22456	-4.68041	1.80768e-05	0.00281522	2.62965
OR2G6	-2.3836	0.725456	-4.65736	1.9603e-05	0.00302463	2.7092
PACRG	-1.69555	-0.106642	-4.65719	1.96147e-05	0.00302463	2.71244
RP11-193J6.1	-2.05188	-0.0643618	-4.65376	1.98531e-05	0.00304413	2.70288
EMCN	-1.78437	3.87617	-4.65257	1.99357e-05	0.00304413	2.60849
SGCZ	-2.55911	-1.9642	-4.64837	2.02324e-05	0.00306812	2.64316
CWH43	-2.47833	-0.69124	-4.64757	2.02888e-05	0.00306812	2.67877
AXDND1	-1.65594	0.0828347	-4.6411	2.0755e-05	0.00312353	2.66218
LINC01510	-2.13693	-1.61411	-4.63775	2.10009e-05	0.00314541	2.61587
CTD-2626G11.2	-2.04068	-0.882108	-4.63576	2.1148e-05	0.00315235	2.63237
PHF21B	-1.94732	0.750123	-4.62528	2.19395e-05	0.00325485	2.60757
GRM1	-1.86322	-0.0158366	-4.62254	2.21508e-05	0.00327069	2.60266
RP11-445F12.1	-2.82406	0.378042	-4.61806	2.25014e-05	0.00330686	2.58371
CLIC5	-2.12942	4.1481	-4.61061	2.30961e-05	0.0033784	2.45981
SLC5A12	-3.64527	2.97596	-4.60229	2.37784e-05	0.00346202	2.45324
AC087762.1	-2.11895	0.615303	-4.59783	2.41526e-05	0.00350023	2.51959
RP11-360A18.2	-1.8397	-1.5012	-4.58745	2.50444e-05	0.00361274	2.45536
FOLH1B	-1.99028	-1.54125	-4.5818	2.55434e-05	0.00366783	2.44002
PRIMA1	-1.82962	0.43121	-4.56331	2.7246e-05	0.00389444	2.41206
RP11-35N6.1	-2.37687	0.803182	-4.55475	2.80716e-05	0.00398751	2.37417
FRMD7	-2.13622	-1.29379	-4.55393	2.81519e-05	0.00398751	2.36595
FBN3	-2.43347	0.475254	-4.55123	2.84174e-05	0.00400698	2.36983
RP13-895J2.6	-2.29921	-0.0153319	-4.54231	2.93141e-05	0.00411488	2.34676
PSMC1P9	-1.79306	-1.74998	-4.53801	2.97565e-05	0.00415834	2.28998
RP11-22L13.1	-2.12028	1.13214	-4.53274	3.03065e-05	0.00421638	2.29982
TCEB1P21	-2.09872	-1.65536	-4.52884	3.07209e-05	0.00425512	2.2743
SLC13A3	-2.64063	3.7793	-4.52307	3.13428e-05	0.00432213	2.17682
SLC15A2	-1.29054	3.67988	-4.51648	3.20688e-05	0.00440285	2.17167
SLC38A11	-1.29834	3.06045	-4.51217	3.25516e-05	0.00444962	2.17936
RP11-327J17.1	-1.16432	1.32909	-4.50636	3.32151e-05	0.00450718	2.22091
RP11-3K16.2	-1.93279	-0.458555	-4.50596	3.32606e-05	0.00450718	2.23024
CPAMD8	-1.48691	4.10884	-4.50205	3.3715e-05	0.00454906	2.11024
SLC9A3	-1.47512	5.1549	-4.49944	3.40225e-05	0.00457084	2.07697
TSPAN8	-2.44774	0.374579	-4.48631	3.56053e-05	0.00475457	2.16337
CTD-2004A9.1	-2.53031	-1.91949	-4.4856	3.56938e-05	0.00475457	2.1412
SRGAP3	-0.846806	4.71443	-4.47972	3.64274e-05	0.00483172	2.02835
HSD11B2	-2.43322	5.14325	-4.47625	3.68672e-05	0.00486943	1.99358
SLC34A1	-3.19007	3.698	-4.47096	3.75486e-05	0.00493858	2.00482
PFN3	-2.31617	-0.924912	-4.46237	3.86802e-05	0.00506613	2.09094
OLIG2	-2.13784	-1.61515	-4.45268	3.99976e-05	0.00521685	2.04223
RP11-258O13.1	-1.83961	-2.57436	-4.44317	4.13313e-05	0.00536844	1.95577
RP11-424I3.1	-1.93677	-2.83547	-4.44061	4.1698e-05	0.00539369	1.93557
INSRR	-2.31494	0.568068	-4.42929	4.33573e-05	0.00558525	1.97991
AP000696.2	-1.94352	-1.66655	-4.42564	4.39061e-05	0.00562221	1.95357
PNPLA1	-1.87446	-0.732424	-4.425	4.40035e-05	0.00562221	1.97448
AP000322.53	-1.95083	-1.9345	-4.41659	4.52965e-05	0.00576389	1.91568
RP11-511B23.2	-1.89892	-1.43235	-4.41466	4.55986e-05	0.00577883	1.92778
AZGP1	-2.77481	1.10973	-4.41219	4.59871e-05	0.00579964	1.90386
CA12	-2.6004	5.86648	-4.41127	4.61333e-05	0.00579964	1.76844
DGKB	-1.63088	-0.245986	-4.40817	4.66272e-05	0.00583829	1.92496
CENPN	0.923979	2.68013	4.40583	4.70044e-05	0.0058461	1.89764
NXPH2	-2.34309	-1.21142	-4.40546	4.70632e-05	0.0058461	1.91044
LAMB4	-1.545	0.34619	-4.39626	4.85757e-05	0.00601013	1.8849
ZNF204P	-1.19879	2.71956	-4.39122	4.9424e-05	0.00609102	1.80302
SSTR5-AS1	-2.07618	0.195143	-4.38546	5.04101e-05	0.00618818	1.85042
SLC22A6	-3.63612	2.46736	-4.38352	5.07477e-05	0.00620529	1.7543
CEACAM1	-1.26174	4.35731	-4.37831	5.16621e-05	0.00627588	1.70302
CYP2B6	-2.44671	-0.496977	-4.37719	5.18606e-05	0.00627588	1.82846
MT1E	-1.19694	3.2152	-4.37682	5.19264e-05	0.00627588	1.73672
AC007246.3	-0.671928	2.44791	-4.37312	5.25901e-05	0.00633165	1.76956
ANKRD62P1	-1.99763	-2.68356	-4.36809	5.35045e-05	0.00641706	1.733
SLC22A13	-1.77921	1.38192	-4.35947	5.51074e-05	0.00658407	1.74264
RP11-65J3.2	-1.73106	-2.45382	-4.35639	5.5692e-05	0.00662862	1.70078
CLN6	1.08923	6.41996	4.35265	5.6408e-05	0.00668841	1.60205
RP11-523J2.1	-1.88149	-2.4807	-4.34487	5.79295e-05	0.0068429	1.67081
ZNF540	-0.962294	2.45157	-4.33501	5.99147e-05	0.00705079	1.64023
AC011738.4	-2.00143	-0.752167	-4.33289	6.03487e-05	0.00707526	1.69076
DDX25	-1.83404	-1.25189	-4.33099	6.07418e-05	0.00709477	1.67627
AQP3	-1.66463	3.91615	-4.32989	6.09701e-05	0.00709497	1.55461
AP000355.2	-1.9436	-2.55437	-4.32656	6.16674e-05	0.00714953	1.61533
KBTBD12	-1.59207	0.184601	-4.32368	6.22765e-05	0.00719351	1.66035
RP11-683O4.1	-1.85078	-0.964985	-4.31629	6.38648e-05	0.00734985	1.63691
ERICH4	-1.70817	-1.82137	-4.31395	6.43765e-05	0.00738161	1.60523
SLC36A2	-3.02246	2.18383	-4.31159	6.48964e-05	0.00741118	1.53964
OR2A3P	-1.19774	-0.517683	-4.31064	6.51079e-05	0.00741118	1.62079
DAO	-2.02076	0.397043	-4.30419	6.65527e-05	0.0075168	1.59166
PRDM16	-1.78898	3.31911	-4.30322	6.6773e-05	0.0075168	1.48831
MPPED2	-1.71596	2.38187	-4.30303	6.68171e-05	0.0075168	1.52618
BDNF-AS	-0.823914	2.90661	-4.30162	6.7139e-05	0.0075168	1.51818
EFHD1	-1.26625	5.47637	-4.30065	6.73609e-05	0.0075168	1.42653
RP11-2E11.9	-1.26757	0.613776	-4.30014	6.74766e-05	0.0075168	1.58296
PCAT18	-1.83346	-2.60033	-4.29264	6.92209e-05	0.00766355	1.50776
UBQLN3	-1.12763	-0.214197	-4.29238	6.92836e-05	0.00766355	1.56666
MUC1	-1.99446	4.71226	-4.29016	6.98084e-05	0.00769441	1.40264
PRKAB1	-0.632851	5.8894	-4.28431	7.1209e-05	0.00782125	1.3722
RP11-390M11.1	-2.08312	-2.56392	-4.2805	7.21367e-05	0.00785084	1.48393
RP11-794G24.1	-1.49534	-0.609432	-4.28038	7.21678e-05	0.00785084	1.52899
GCNT4	-1.08177	3.02764	-4.2789	7.25302e-05	0.00785084	1.4335
RASL11B	-1.37253	1.63483	-4.27644	7.31382e-05	0.00785084	1.47864
RHBG	-2.18029	1.9207	-4.27621	7.31967e-05	0.00785084	1.45073
ASXL3	-2.26381	2.07371	-4.27562	7.33426e-05	0.00785084	1.44097
SPON2	1.5693	8.73145	4.27509	7.34754e-05	0.00785084	1.31975
SHISA3	-1.30937	3.05559	-4.27505	7.34848e-05	0.00785084	1.41689
GS1-204I12.3	-1.87132	-2.24134	-4.27395	7.37604e-05	0.00785348	1.4728
FAM107A	-1.06785	3.77461	-4.27111	7.44738e-05	0.00790255	1.37912
RP11-349H17.2	-1.91546	-1.17786	-4.26682	7.55664e-05	0.00796625	1.48377
ARHGAP22	1.17447	4.03119	4.26543	7.59224e-05	0.00796625	1.4085
ADH1C	-1.78701	0.0638039	-4.26506	7.60183e-05	0.00796625	1.47868
CACNA2D3	-1.28967	1.57985	-4.26477	7.6092e-05	0.00796625	1.44687
AC012123.1	-1.6216	-1.32104	-4.25331	7.91079e-05	0.00822802	1.43667
MT1X	-1.43685	3.6465	-4.25248	7.93291e-05	0.00822802	1.31976
TMEM61	-2.02334	-0.793913	-4.25206	7.94414e-05	0.00822802	1.44319
OLIG1	-2.20485	-0.642524	-4.25131	7.96438e-05	0.00822802	1.44102
EEF2K	0.974376	7.12344	4.24906	8.02527e-05	0.00826366	1.25398
RP11-442O1.3	-1.53955	-0.171353	-4.24611	8.10585e-05	0.00831925	1.42452
RP11-438F14.3	-2.31606	-0.725148	-4.24345	8.17922e-05	0.00836713	1.41717
MCCD1	-1.85604	-1.38396	-4.24117	8.24255e-05	0.00838683	1.40252
NR3C2	-0.92186	5.38932	-4.24083	8.25206e-05	0.00838683	1.23936
RP11-42I10.1	1.65758	0.320832	4.2362	8.38224e-05	0.00849156	1.37396
SLC39A5	-1.84868	2.62233	-4.23449	8.43092e-05	0.00851332	1.29544
IL17RB	-1.33129	3.79744	-4.21631	8.96495e-05	0.00902347	1.20029
ENPP6	-2.14959	0.504216	-4.20822	9.21276e-05	0.00924318	1.29003
AC006273.5	-1.29054	0.508526	-4.20718	9.24523e-05	0.00924612	1.29784
SLC5A3	-1.20038	7.47316	-4.20509	9.31052e-05	0.00928175	1.09169
RP11-305L7.7	-1.15492	2.15237	-4.19758	9.54921e-05	0.00948271	1.21523
RAB25	-2.36769	0.387268	-4.19685	9.57268e-05	0.00948271	1.25595
CYP8B1	-1.54579	1.59851	-4.19326	9.68919e-05	0.00956785	1.21676
HMX2	-2.01346	-2.60017	-4.18964	9.80797e-05	0.00965468	1.21312
FREM1	-1.63321	4.87826	-4.1877	9.87203e-05	0.00968367	1.0752
PI4K2A	0.819623	6.3253	4.18688	9.89929e-05	0.00968367	1.06978
UNCX	-2.23205	-2.05625	-4.18533	9.95106e-05	0.00970398	1.22511
PDCL3P4	-0.965759	0.49871	-4.16411	0.000106866	0.0103889	1.16936
CTD-2515H24.4	-1.91364	-0.324748	-4.16167	0.000107745	0.0104419	1.16714
GSTA1	-3.09511	1.01268	-4.16036	0.000108219	0.0104555	1.10796
RP11-357H14.16	-1.1183	3.89805	-4.15822	0.000108998	0.0104909	1.01818
CDCA4	0.797797	2.97601	4.15733	0.000109325	0.0104909	1.10438
WNK3	-0.977266	3.0976	-4.1566	0.000109591	0.0104909	1.04755
TFAP2A	-1.8513	2.10865	-4.15536	0.00011005	0.0105028	1.07062
PRDM7	-1.67504	-1.77196	-4.15356	0.000110716	0.0105342	1.1305
FAM83B	-2.22337	1.37647	-4.15109	0.000111635	0.0105894	1.08042
POU3F4	-2.26999	-1.97465	-4.14638	0.000113413	0.0107256	1.11279
BNIP3P22	-1.77552	-0.138166	-4.13848	0.000116453	0.0109686	1.0948
SEPT7-AS1	-1.02914	1.39339	-4.13707	0.000117001	0.0109686	1.0612
HHIP	-1.32716	2.33327	-4.13699	0.000117034	0.0109686	1.01413
RP13-213K19.1	-2.12329	-0.25048	-4.13569	0.000117544	0.0109835	1.08598
AC009336.19	-1.30687	3.43297	-4.13429	0.000118096	0.0110023	0.956901
CBLC	-1.8181	-0.402838	-4.12697	0.000121023	0.0112415	1.06339
GADL1	-1.85385	-1.15404	-4.12399	0.000122235	0.0113205	1.05532
ESRP1	-2.19998	1.55465	-4.12277	0.000122731	0.0113329	0.986379
RP11-236L14.1	-1.71079	-1.05023	-4.11869	0.000124415	0.0114546	1.03986
RP11-238K6.1	-1.69978	-1.88926	-4.11241	0.000127055	0.0116347	1.00722
RAB6B	1.013	5.79111	4.11227	0.000127114	0.0116347	0.851517
CFAP221	-1.16452	3.01047	-4.10063	0.000132146	0.0120312	0.872443
PWRN1	-2.20981	2.45128	-4.10014	0.000132361	0.0120312	0.875589
RP11-531H8.2	-1.90018	-3.10554	-4.0996	0.0001326	0.0120312	0.928367
NANOGP8	-1.44152	-1.05556	-4.09378	0.000135196	0.0122039	0.964712
COLCA1	-1.1442	3.71324	-4.09334	0.000135395	0.0122039	0.821344
ZNF577	-0.649173	4.03975	-4.09262	0.00013572	0.0122039	0.814731
SLC13A2	-2.75569	1.68184	-4.09162	0.000136172	0.0122039	0.872996
C1orf64	-1.9089	-2.49314	-4.091	0.000136452	0.0122039	0.928828
RP11-323I15.5	-1.14025	0.0118335	-4.08371	0.000139802	0.0124679	0.932282
OR2A13P	-1.54766	-0.981359	-4.07969	0.000141685	0.0125999	0.924088
HPSE2	-1.89358	-0.745207	-4.07806	0.000142456	0.0126326	0.919265
NTRK3-AS1	-1.69609	-1.89042	-4.07442	0.000144188	0.01275	0.895361
RP11-511B23.4	-1.63842	-2.8278	-4.06678	0.000147897	0.0130177	0.839147
HECW1	-1.53062	2.70904	-4.06598	0.000148288	0.0130177	0.771156
SCN7A	-1.97959	1.17779	-4.06563	0.000148462	0.0130177	0.830844
XXyac-YM21GA2.7	-2.08863	-0.0353995	-4.06469	0.000148927	0.0130219	0.867235
RP11-517I3.2	-1.16181	1.49239	-4.063	0.000149765	0.0130588	0.82692
GJA3	-1.75098	-1.36319	-4.05778	0.000152381	0.01325	0.85744
RP11-475A13.2	-1.76876	-2.68306	-4.05126	0.000155709	0.0135018	0.804416
CPNE6	-1.06145	0.835777	-4.04833	0.000157229	0.013596	0.808077
FSIP2	-0.971648	4.35308	-4.04685	0.000158003	0.0136253	0.655683
TNNT2	-1.95924	0.537712	-4.04071	0.000161248	0.0138331	0.780386
FICD	0.721981	4.08791	4.04062	0.000161297	0.0138331	0.688639
RP5-1139B12.4	-1.1218	0.343942	-4.03243	0.00016573	0.0141744	0.772819
RP11-236L14.2	-1.12366	0.716595	-4.03124	0.000166381	0.0141914	0.758974
RP11-545A16.1	-1.62199	-1.63292	-4.02602	0.000169279	0.0143966	0.759571
KCNH6	-1.75486	1.04829	-4.02444	0.000170164	0.0143966	0.715712
RP11-715J22.6	-0.850905	2.09531	-4.02443	0.000170168	0.0143966	0.691395
LINC01020	-1.88483	-2.58878	-4.02303	0.000170957	0.0143997	0.729769
SLC4A2	0.894282	7.48201	4.02274	0.000171124	0.0143997	0.533628
OR2A5	-1.62674	-0.529422	-4.02124	0.000171973	0.0144324	0.749972
MST1L	-1.96268	4.97414	-4.01936	0.000173047	0.0144836	0.542727
ARHGEF38	-2.32037	1.70221	-4.01679	0.000174519	0.0145679	0.651238
TMEM185B	0.503958	5.43481	4.0103	0.000178298	0.0148438	0.534918
NPSR1-AS1	-2.01098	-1.59757	-4.00816	0.00017956	0.0148816	0.711753
RP11-367O10.1	-1.81926	-1.5961	-4.00792	0.000179703	0.0148816	0.709879
LHX1	-2.68569	1.82291	-4.00579	0.000180972	0.0149472	0.605647
LINC00626	-1.72504	-2.73503	-4.0048	0.000181563	0.0149519	0.669502
GATA3	-1.83016	3.38957	-4.00399	0.000182044	0.0149519	0.545807
LIX1	-1.42657	1.51674	-4.0033	0.000182462	0.0149519	0.637977
ITIH5	-1.27971	4.15872	-3.99731	0.000186101	0.0152103	0.504588
NAALADL2	-1.3362	3.18672	-3.99529	0.000187343	0.0152719	0.534962
PM20D1	-1.6579	0.149543	-3.99355	0.000188415	0.015299	0.653997
CA4	-1.80025	0.555357	-3.99317	0.000188654	0.015299	0.638278
RP11-180I4.4	-1.4256	-0.0744001	-3.99058	0.000190271	0.0153903	0.653216
LONP1	1.0203	6.74048	3.98588	0.000193238	0.01559	0.435012
SLC8A1-AS1	-1.04921	2.22708	-3.9814	0.000196103	0.0157805	0.547994
RP11-451B8.1	-1.92354	-2.75696	-3.97674	0.000199133	0.0159832	0.593927
ADRB1	-1.39792	-0.0727563	-3.97289	0.000201666	0.0161452	0.601844
RP11-314N2.2	-1.84574	-2.06502	-3.96882	0.000204381	0.0163208	0.589524
HAO2	-2.89635	2.30846	-3.96702	0.000205589	0.0163755	0.459546
LINC00484	-0.990419	1.8123	-3.96408	0.000207582	0.0164922	0.517681
OR2T29	-2.79	0.860471	-3.95836	0.000211512	0.0167619	0.508676
NIPAL1	-1.11939	1.57092	-3.95685	0.000212567	0.016803	0.503746
C21orf62-AS1	-0.981016	1.22185	-3.95411	0.000214483	0.0169117	0.513713
KIAA0087	-1.48007	0.0356043	-3.94947	0.000217772	0.0171081	0.528461
CFTR	-1.05173	1.40124	-3.94905	0.000218066	0.0171081	0.489867
RP11-295M3.4	-1.26554	2.48157	-3.94535	0.000220727	0.0172643	0.421312
CD276	0.817453	6.01173	3.94453	0.000221316	0.0172643	0.321801
VAT1	1.00192	8.09548	3.94346	0.000222096	0.0172643	0.280055
CTB-139P11.2	-1.07365	1.29877	-3.94323	0.000222263	0.0172643	0.474458
FAM220CP	-1.53355	0.129296	-3.93892	0.000225424	0.0174539	0.494187
MAGEE2	-1.65806	-1.44539	-3.93801	0.000226093	0.0174539	0.507935
NPAP1	-2.16592	1.34973	-3.93763	0.000226377	0.0174539	0.432286
LINC00671	-2.49466	2.5102	-3.93273	0.00023003	0.017692	0.353987
SLC7A1	1.1646	6.79238	3.93031	0.000231857	0.0177887	0.264553
LINC01085	-1.60157	-1.54535	-3.92914	0.000232746	0.0178133	0.48143
OVOL1	-1.98723	0.702286	-3.92407	0.000236629	0.0180031	0.423336
RP11-475O6.1	-1.05964	1.25567	-3.92372	0.000236901	0.0180031	0.419821
MAL	-1.89306	4.22511	-3.92289	0.000237545	0.0180031	0.265813
ENOX1	-1.13697	1.00343	-3.92247	0.000237869	0.0180031	0.423213
CATIP	-1.3214	0.432501	-3.92217	0.000238101	0.0180031	0.439005
ARL4P	-1.6111	-0.733856	-3.91895	0.000240623	0.0181499	0.45166
VTCN1	-1.7475	2.08628	-3.91493	0.000243794	0.0183449	0.335602
SMIM11	-0.673447	2.56415	-3.91355	0.000244899	0.0183838	0.337415
PLA2R1	-0.881984	6.12727	-3.90892	0.000248618	0.0186184	0.188578
CALCR	-1.76915	-0.454904	-3.90113	0.000255013	0.0190464	0.394077
CTD-2331H12.5	-0.91637	1.04214	-3.90048	0.00025555	0.0190464	0.361002
KDF1	-1.26395	1.07095	-3.89864	0.000257092	0.0190963	0.347887
WBP2	0.729002	7.10508	3.89822	0.00025744	0.0190963	0.154875
RP11-571O6.2	-1.91521	-2.54636	-3.89679	0.000258644	0.0191007	0.374101
RP11-205M3.3	-1.84227	-0.443013	-3.89652	0.000258867	0.0191007	0.379591
BMP5	-2.24894	-0.200199	-3.8953	0.000259895	0.0191007	0.364805
RRP1	1.0483	4.61299	3.89525	0.000259939	0.0191007	0.22996
AHNAK2	2.57974	9.01647	3.89143	0.000263195	0.0192916	0.123011
MOGAT2	-1.85635	-2.31448	-3.89075	0.00026377	0.0192916	0.363001
PGAM1P5	-1.41171	1.52178	-3.88972	0.000264658	0.0193114	0.297655
TUBAL3	-1.91776	-2.07512	-3.88802	0.000266127	0.0193734	0.360107
AC080125.1	-1.96051	-2.75616	-3.8845	0.000269189	0.0194998	0.334936
LINC01543	-1.78434	-2.70582	-3.88359	0.000269988	0.0194998	0.3306
SLC5A2	-1.42893	3.35308	-3.88254	0.000270912	0.0194998	0.184332
UPP2	-1.44848	1.46181	-3.88248	0.00027096	0.0194998	0.276582
KLK7	-2.09536	-1.47134	-3.88246	0.000270978	0.0194998	0.348988
RP3-389A20.5	-1.24383	-1.09867	-3.88011	0.000273052	0.019604	0.342247
NTNG1	-1.73014	1.62642	-3.87832	0.000274648	0.0196399	0.252206
SERPINE2	1.19989	7.12003	3.87655	0.000276234	0.0196399	0.0942901
CFAP57	-1.52814	1.21423	-3.876	0.000276722	0.0196399	0.267858
CYP4X1	-1.30862	1.13798	-3.87564	0.000277046	0.0196399	0.275181
TDRD1	-1.70921	-1.47996	-3.87526	0.000277388	0.0196399	0.32812
RP4-734G22.3	-1.15849	3.07754	-3.87493	0.000277684	0.0196399	0.17998
RP11-327J17.7	-1.0749	1.28583	-3.87449	0.000278084	0.0196399	0.271089
SLC8A1	-1.2203	5.89153	-3.87395	0.000278572	0.0196399	0.082697
SLC52A3	-1.61693	1.19402	-3.87196	0.00028038	0.019723	0.255438
OR2A12	-1.46095	-1.01029	-3.86614	0.000285719	0.0200535	0.301886
LPA	-2.49603	-0.103292	-3.86465	0.000287103	0.0201056	0.268543
AP001172.2	-1.12523	0.915833	-3.85956	0.000291875	0.0203941	0.240419
C2orf40	-1.74778	2.02001	-3.85662	0.000294672	0.0204354	0.164157
RP11-274B18.3	-1.49961	-1.35591	-3.85642	0.000294867	0.0204354	0.274357
RP11-617F23.1	-0.84186	4.44941	-3.85634	0.000294937	0.0204354	0.0712022
NEGR1	-1.29596	3.3616	-3.85619	0.000295077	0.0204354	0.105135
SLC1A4	0.690332	4.88916	3.854	0.000297181	0.0205131	0.0812499
RNF150	-1.15559	4.74786	-3.85353	0.000297632	0.0205131	0.0482078
AC004870.4	-1.69728	-1.84453	-3.85265	0.00029848	0.0205131	0.261274
AGR2	-1.70193	-0.791471	-3.8523	0.00029882	0.0205131	0.258551
CNGA1	-1.36254	-0.137892	-3.8497	0.000301344	0.020641	0.241592
CTA-929C8.6	-1.76085	-2.04074	-3.84343	0.00030752	0.0210086	0.233185
CGNL1	-1.50434	6.27181	-3.84256	0.000308382	0.0210086	-0.0214402
FCF1P2	-1.73826	-1.39432	-3.84222	0.000308722	0.0210086	0.234064
SYTL4	-0.875409	3.43159	-3.84052	0.000310424	0.0210785	0.0643645
SUSD4	-1.40033	2.79719	-3.83962	0.000311335	0.0210947	0.0824521
RP3-333A15.2	-1.84941	0.00899913	-3.83855	0.000312412	0.0211219	0.197812
RP11-286N22.16	-1.74108	-2.06376	-3.83632	0.000314668	0.0212285	0.212345
MYL3	-1.58038	0.95101	-3.83521	0.000315794	0.0212587	0.157443
TCF24	-1.55295	-1.79799	-3.83375	0.000317289	0.0213135	0.207384
VPS18	1.16431	6.51533	3.82361	0.000327846	0.0219755	-0.0530243
SETBP1	-0.589516	6.95553	-3.82117	0.000330434	0.0220941	-0.0895789
SLC35C1	0.635649	4.44343	3.82061	0.000331027	0.0220941	0.000191778
OCLN	-1.04642	4.6044	-3.81915	0.000332593	0.0221514	-0.0496842
GRAMD2	-1.07077	2.04961	-3.81627	0.000335693	0.0223104	0.0630491
CTCFL	-1.47731	-3.49101	-3.81495	0.000337123	0.0223579	0.118202
HS6ST2	-1.64166	2.40341	-3.81345	0.000338759	0.022419	0.0166396
CNTN1	-1.7466	3.1958	-3.81201	0.00034033	0.0224754	-0.0297679
KSR2	-1.31745	3.09774	-3.80839	0.000344319	0.022691	-0.0255468
LINC00240	-0.939218	1.05102	-3.80565	0.000347373	0.0228441	0.0811075
PTN	-1.47392	2.20465	-3.80335	0.000349948	0.0229653	0.00274448
AC013275.2	-1.7816	0.616479	-3.80229	0.000351147	0.0229957	0.0705752
NPM1P25	-1.18762	0.128063	-3.80007	0.000353661	0.023112	0.0929747
NR2F2-AS1	-0.804982	4.38768	-3.79907	0.000354797	0.0231379	-0.098064
CTD-3214H19.6	-1.41866	-0.679373	-3.79708	0.000357081	0.0232284	0.100641
HOXD3	-0.988998	2.91411	-3.79657	0.000357668	0.0232284	-0.0413132
RP11-321G12.1	-1.74766	-2.19562	-3.79474	0.000359777	0.0233169	0.0945564
KLK6	-2.1292	-0.937626	-3.79116	0.000363932	0.0235375	0.0820042
RP11-180C16.1	-0.808674	2.70352	-3.79032	0.000364914	0.0235441	-0.0435539
RERGL	-1.7814	-0.0431772	-3.78967	0.000365674	0.0235441	0.0588057
BBC3	1.17658	4.37294	3.78915	0.00036629	0.0235441	-0.0695362
AC068138.1	-1.80149	-2.17591	-3.78658	0.000369325	0.0236669	0.0723688
FECH	-0.762666	4.57977	-3.78525	0.000370909	0.0236669	-0.146028
RP11-480I12.5	-1.33692	-0.264627	-3.78456	0.000371726	0.0236669	0.0565133
LINC01517	-1.75141	-0.722895	-3.78445	0.000371857	0.0236669	0.0621048
DDN	-2.06778	1.46167	-3.78435	0.000371981	0.0236669	-0.028071
PTPRO	-1.12231	3.63808	-3.78144	0.00037547	0.0238163	-0.127538
RPS6KA6	-1.3664	3.03284	-3.78065	0.000376415	0.0238163	-0.107246
THSD4-AS1	-1.56178	-0.352895	-3.78049	0.000376612	0.0238163	0.0449001
MRPL42P4	-1.56932	-3.0258	-3.77937	0.000377962	0.0238535	0.0323169
PDZD3	-1.74351	3.04161	-3.77728	0.000380505	0.0239657	-0.123186
PHLDA3	1.04927	5.11336	3.77647	0.000381496	0.0239799	-0.150301
UNGP1	-1.65306	-1.36211	-3.77171	0.000387355	0.0242518	0.0345739
RP11-253M7.6	-1.22401	0.0169109	-3.77144	0.000387695	0.0242518	0.0136233
CTC-321K16.4	-1.90834	0.309165	-3.77108	0.000388146	0.0242518	-0.0102381
FGF14-IT1	-1.33685	-0.0914482	-3.77007	0.000389399	0.0242816	0.0111195
SLC16A5	-1.19213	3.56039	-3.76832	0.000391584	0.0243693	-0.163614
GPRIN1	1.59343	2.07547	3.76587	0.000394671	0.0244884	-0.0143577
LINC00284	-1.87613	1.15151	-3.76554	0.000395085	0.0244884	-0.0619157
FNDC4	1.50983	2.23708	3.76494	0.000395846	0.0244884	-0.0260505
CDK4	0.802952	5.60183	3.7631	0.00039819	0.0245849	-0.215431
PCDHB1	-1.74563	-0.137374	-3.76227	0.000399244	0.0246015	-0.0158114
MFSD5	0.904286	4.48607	3.76042	0.000401614	0.0246804	-0.175613
REN	-2.92567	1.3024	-3.76004	0.000402101	0.0246804	-0.112238
RP11-290F24.6	-0.960761	-0.0345669	-3.75008	0.000415115	0.0254043	-0.0425525
AIM1	-0.747414	5.82179	-3.74977	0.000415519	0.0254043	-0.284855
SMIM5	-0.782504	4.1591	-3.74776	0.000418201	0.025492	-0.240877
OR2A2	-1.47443	-1.66199	-3.74738	0.000418706	0.025492	-0.0337446
AGPAT3	1.02608	8.68479	3.74686	0.000419397	0.025492	-0.323125
COL6A4P2	-1.6858	-0.462084	-3.74386	0.000423438	0.025657	-0.0584799
SYNM	1.09561	6.02904	3.74363	0.000423751	0.025657	-0.280614
AC005592.3	-1.53488	-2.04933	-3.74299	0.000424619	0.02566	-0.0487433
TRPV6	-1.7654	1.93627	-3.73639	0.00043365	0.0261552	-0.187181
AVPI1	1.47214	3.49884	3.73546	0.000434936	0.0261823	-0.172309
IL1RL1	-1.58824	2.38669	-3.73432	0.000436518	0.0262271	-0.213598
CDH9	-2.07135	-0.875492	-3.73275	0.000438705	0.026288	-0.0850994
RP11-744O11.2	-1.55058	-1.22795	-3.73239	0.00043921	0.026288	-0.076608
GPR123	-1.63928	-1.45104	-3.72983	0.000442812	0.026453	-0.0826646
ARL8A	0.526865	5.35706	3.72793	0.0004455	0.0265628	-0.317634
EVPLL	-1.81141	-1.91867	-3.72455	0.000450321	0.0267993	-0.0973084
RP11-111A21.1	-0.83286	0.480633	-3.7234	0.000451968	0.0268388	-0.132262
PRAP1	-1.81872	0.60849	-3.72289	0.0004527	0.0268388	-0.16042
SCN3A	-1.71217	3.42396	-3.72153	0.000454673	0.0269048	-0.306984
GINS4	1.00298	1.82913	3.71788	0.00045998	0.0271199	-0.157272
CHL1-AS1	-1.50324	-0.928653	-3.71784	0.000460041	0.0271199	-0.120761
EHF	-1.89814	2.78246	-3.71592	0.000462849	0.027197	-0.298348
LHFPL3-AS1	-1.73953	-1.54659	-3.71576	0.000463086	0.027197	-0.121827
RP11-759A24.1	-0.894457	4.0727	-3.71367	0.000466171	0.0273268	-0.342636
TCF21	-2.18909	3.7135	-3.71271	0.000467597	0.0273336	-0.350872
RP5-952N6.1	-1.84779	-0.0550328	-3.71186	0.000468867	0.0273336	-0.165734
SPNS1	1.03254	6.07851	3.7114	0.00046955	0.0273336	-0.378655
PACS1	0.689854	7.3865	3.71069	0.000470614	0.0273336	-0.415103
RP11-627G23.1	-1.94634	3.08936	-3.71066	0.000470651	0.0273336	-0.327918
AGPAT9	-1.12326	3.61194	-3.70781	0.000474933	0.0274512	-0.345067
BRI3	0.739874	6.60849	3.7077	0.000475106	0.0274512	-0.407723
ESPNP	-1.68282	1.08164	-3.70756	0.000475308	0.0274512	-0.22149
PDE1A	-1.56408	3.88161	-3.70369	0.000481186	0.0277245	-0.376665
KCNC4	-0.955444	6.02504	-3.70328	0.000481811	0.0277245	-0.429253
RP11-124A7.1	-1.03108	-0.167308	-3.7015	0.000484541	0.0278305	-0.178102
C2orf54	-2.20231	-0.452975	-3.69958	0.000487507	0.0279145	-0.192449
HOXD10	-1.63517	3.08971	-3.6994	0.000487789	0.0279145	-0.354971
RAB3IL1	0.910551	5.01241	3.69755	0.000490651	0.0279513	-0.383197
NUPR1L	-1.84755	-1.76562	-3.69737	0.000490942	0.0279513	-0.172357
RP11-999E24.3	-1.13924	0.21662	-3.69684	0.000491762	0.0279513	-0.206075
RP11-337C18.8	-1.26091	-0.717029	-3.69669	0.000492003	0.0279513	-0.181445
SUSD2	-1.19519	3.67619	-3.69311	0.000497612	0.0282188	-0.392574
RP11-509A17.3	-1.83155	-1.71047	-3.69009	0.000502391	0.0284383	-0.192645
RP1	-1.65346	1.53817	-3.68782	0.000506025	0.0285923	-0.303254
GATAD2A	0.56058	6.83002	3.68469	0.000511063	0.0288046	-0.482982
RP3-335N17.2	-1.68901	-0.52325	-3.68434	0.000511624	0.0288046	-0.225948
AC083843.1	-1.05885	5.04597	-3.68224	0.000515036	0.0289446	-0.470624
ANGPT1	-1.21744	3.18117	-3.67533	0.000526433	0.0294981	-0.421538
TARID	-1.58198	1.47147	-3.67512	0.000526769	0.0294981	-0.332819
OR2T2	-2.23494	0.816091	-3.67261	0.000530974	0.0296662	-0.320098
ADRM1	0.812297	4.9717	3.67145	0.000532919	0.0296662	-0.461278
IFT88	-0.632078	3.95495	-3.67109	0.00053353	0.0296662	-0.457304
RP11-327J17.2	-0.920843	1.36257	-3.67089	0.000533867	0.0296662	-0.32367
BAX	0.650221	5.15182	3.67051	0.000534509	0.0296662	-0.476105
RP11-66N24.6	-1.64602	-3.04055	-3.66909	0.000536919	0.0297169	-0.264891
ANKRD6	0.741275	5.94702	3.66841	0.000538068	0.0297169	-0.507061
FEN1	0.755342	2.62067	3.66829	0.00053827	0.0297169	-0.345782
THRB	-0.895467	4.17303	-3.66444	0.000544856	0.0299559	-0.491217
ZNF812	-1.43478	-1.17319	-3.66426	0.000545172	0.0299559	-0.266563
RP11-760H22.2	-0.932552	0.158124	-3.66383	0.000545904	0.0299559	-0.293091
SLCO3A1	0.652925	5.74056	3.66353	0.000546428	0.0299559	-0.516938
AC005162.5	-1.34311	-1.50952	-3.66045	0.000551757	0.03015	-0.274078
RASSF9	-1.18546	2.31954	-3.66037	0.000551895	0.03015	-0.415191
RP4-710M3.2	-1.61079	-2.32313	-3.65582	0.000559876	0.0305081	-0.290005
CCDC158	-1.24864	0.484088	-3.65553	0.000560398	0.0305081	-0.3361
CNKSR1	-1.48436	1.08081	-3.65485	0.000561585	0.0305196	-0.367607
KLF8	-0.618669	5.54428	-3.65364	0.000563735	0.0305834	-0.560902
HPCAL4	-1.51101	0.816962	-3.65108	0.000568297	0.0307775	-0.368643
RP11-86K22.1	-1.66246	-1.09308	-3.6492	0.000571681	0.0309073	-0.31125
CXorf22	-1.58204	-0.735068	-3.64704	0.000575586	0.0310391	-0.32389
ATP6V1C2	-1.07624	3.37211	-3.64675	0.000576102	0.0310391	-0.51044
SIAH3	-1.47691	-0.604824	-3.64466	0.000579924	0.031186	-0.331703
RP11-116G8.5	-1.74228	-2.97774	-3.64416	0.000580821	0.031186	-0.329398
ACSF2	-0.896493	4.80096	-3.64346	0.000582107	0.0312015	-0.574233
GRN	1.30782	8.93912	3.63638	0.000595218	0.0318497	-0.651059
CUBN	-2.2914	6.80431	-3.63213	0.000603239	0.0322239	-0.660623
SLC9C1	-1.19243	-1.1665	-3.62939	0.000608453	0.032447	-0.361208
PPP5D1	-0.624054	1.45755	-3.62795	0.000611197	0.0325343	-0.441946
MACC1	-1.66387	4.78878	-3.62745	0.000612168	0.0325343	-0.630758
CEP250	0.682106	5.89257	3.62123	0.000624228	0.033119	-0.644876
COL4A6	-1.43719	1.67709	-3.61971	0.000627215	0.0331901	-0.502751
CENPA	1.91852	-0.915874	3.61947	0.000627689	0.0331901	-0.395692
RP5-1018K9.1	-1.62605	-2.50764	-3.6164	0.000633776	0.0333991	-0.397841
C6orf1	0.675455	3.91951	3.61621	0.000634139	0.0333991	-0.571999
MEST	-0.935649	3.91031	-3.61586	0.000634843	0.0333991	-0.623504
RP11-332J15.3	1.68185	-1.51387	3.61466	0.00063723	0.0334685	-0.415594
RP11-511B23.1	-1.81517	-2.71634	-3.61052	0.000645565	0.0338495	-0.414937
AC141928.1	-1.36746	1.35337	-3.60964	0.000647338	0.0338856	-0.5103
DIRAS3	-1.06716	0.355655	-3.60857	0.000649518	0.033943	-0.459623
SPTSSB	-1.52949	-1.19477	-3.60678	0.000653158	0.0340763	-0.425723
RP11-35J10.7	-1.41431	-2.13631	-3.60517	0.000656461	0.0341579	-0.425896
RP11-155L15.1	-1.43846	-2.32163	-3.60484	0.000657136	0.0341579	-0.42817
RPL34-AS1	-0.962023	-0.637238	-3.60443	0.000657994	0.0341579	-0.437182
C20orf24	0.850056	4.63491	3.60263	0.000661715	0.0341989	-0.644798
MAZ	0.766885	6.789	3.60211	0.000662774	0.0341989	-0.721186
LRTM1	-1.5697	-1.95161	-3.60209	0.000662834	0.0341989	-0.43308
CASZ1	-0.993553	4.73378	-3.60189	0.000663247	0.0341989	-0.694215
SOX2-OT	-1.08485	0.248697	-3.60141	0.000664247	0.0341989	-0.474432
BLOC1S3	0.777256	4.00464	3.59826	0.000670812	0.0344051	-0.624008
VAT1L	-1.57878	-0.159694	-3.59817	0.000671009	0.0344051	-0.479135
RP11-2E11.6	-1.06343	-0.00409657	-3.59791	0.000671549	0.0344051	-0.475288
ORAI1	0.784535	3.44912	3.59386	0.000680116	0.0347704	-0.603465
NPLOC4	0.545735	7.71168	3.59349	0.000680901	0.0347704	-0.766332
FLJ22763	-1.93881	-1.86272	-3.59036	0.000687587	0.0350546	-0.4661
RPS5P2	-0.840453	0.441947	-3.5894	0.000689647	0.0351025	-0.511297
BCAP31	0.762027	6.43095	3.58341	0.000702681	0.0357078	-0.767559
CFAP43	-1.07551	1.59468	-3.58237	0.000704952	0.0357643	-0.593178
CRISPLD1	1.36953	3.16825	3.58141	0.000707073	0.0357643	-0.605177
RP11-522B15.6	-1.27303	-0.387469	-3.58134	0.00070722	0.0357643	-0.511467
FAM65C	-1.14334	5.07447	-3.57899	0.000712426	0.0359694	-0.772809
AEN	0.595336	4.75945	3.57825	0.000714075	0.0359947	-0.729836
ADORA2A-AS1	-0.990331	1.58404	-3.57643	0.000718137	0.0361412	-0.606648
SOX9-AS1	-1.69848	0.193634	-3.57333	0.000725118	0.036434	-0.565119
SCN2A	-1.94091	3.77045	-3.57184	0.000728491	0.0365448	-0.762026
SLC35B2	0.61602	5.12187	3.56981	0.000733106	0.0367165	-0.769293
AC105921.5	-1.72222	-0.484124	-3.56887	0.00073526	0.0367165	-0.55031
OPHN1	-0.622945	4.13181	-3.56879	0.000735434	0.0367165	-0.762705
DPH6	-0.709925	3.57031	-3.56794	0.000737398	0.036756	-0.739415
SLC6A8	1.01755	8.18533	3.56684	0.000739922	0.0368232	-0.846157
SLC15A4	0.748104	6.05498	3.56624	0.000741298	0.0368331	-0.80826
AGXT	-2.02896	0.363314	-3.56359	0.00074744	0.0370794	-0.606276
CAPS2	-0.600416	3.11375	-3.56106	0.000753347	0.0373071	-0.729751
CGN	-1.56932	3.50356	-3.56061	0.000754413	0.0373071	-0.777006
RP11-362F19.1	-1.1101	2.27715	-3.55787	0.000760858	0.0375665	-0.702964
C1orf111	-1.37591	-0.248311	-3.5571	0.00076268	0.0375913	-0.585508
A1CF	-1.65357	2.40507	-3.55661	0.000763854	0.0375913	-0.734263
C19orf83	2.08923	-2.09721	3.55614	0.000764964	0.0375913	-0.581494
AASS	-0.604251	5.44128	-3.55531	0.000766945	0.0376296	-0.844578
MECOM	-1.41092	5.35003	-3.55332	0.000771699	0.0377845	-0.857565
ABCA4	-1.58111	0.828265	-3.55298	0.000772515	0.0377845	-0.649365
APOL2	0.554224	5.41282	3.55186	0.00077521	0.0378236	-0.83285
OR2T35	-1.97788	-1.17096	-3.55164	0.000775733	0.0378236	-0.581148
SLC26A4-AS1	-1.34616	-1.97203	-3.54907	0.000781957	0.0380678	-0.575861
LIMK1	0.740515	5.33841	3.54377	0.000794934	0.0386395	-0.849026
TNFSF15	-1.24813	3.7175	-3.54102	0.000801748	0.0389102	-0.835986
GTF3A	0.557347	5.18939	3.54003	0.000804212	0.0389694	-0.858999
LDLRAD3	0.927137	5.77363	3.53879	0.000807296	0.0390524	-0.875403
CTD-3051D23.4	-1.07299	-0.379707	-3.53799	0.000809317	0.0390524	-0.627877
KLHL14	-1.04007	2.40104	-3.53785	0.000809666	0.0390524	-0.764355
AC007036.4	-0.955752	-0.246672	-3.53388	0.000819684	0.0394747	-0.641509
TACC3	0.727696	4.24916	3.53225	0.000823845	0.0395841	-0.829287
RP5-1024C24.1	-1.62335	-2.81806	-3.532	0.000824484	0.0395841	-0.625906
BHLHE41	0.816516	7.45348	3.53114	0.000826663	0.0396279	-0.939159
PSME2P2	1.17796	-1.03024	3.52885	0.000832559	0.0398495	-0.632761
MAPRE1P3	-1.76748	-1.72951	-3.52601	0.000839917	0.0401404	-0.64023
PAQR5	-1.13831	5.35117	-3.52209	0.000850149	0.040565	-0.944743
RNF152	-1.10933	6.8339	-3.52162	0.000851395	0.040565	-0.975159
ZNRF3-AS1	-0.900766	1.78002	-3.51981	0.000856164	0.0407302	-0.774099
AC073326.3	-1.21817	-1.07237	-3.51909	0.000858073	0.0407591	-0.663485
CHL1	-1.44679	4.21086	-3.51762	0.000861991	0.0408832	-0.927259
RPS6KA4	0.77897	5.1605	3.51597	0.000866394	0.0409569	-0.920501
KIAA2022	-1.31214	2.09488	-3.51589	0.00086661	0.0409569	-0.819511
CSMD3	-1.5964	-1.93011	-3.51546	0.000867772	0.0409569	-0.665895
RP11-141M3.6	-1.21986	-0.028387	-3.51461	0.000870055	0.0409569	-0.708282
TSPAN7	-1.22231	3.41646	-3.51459	0.000870087	0.0409569	-0.898505
RP11-90P13.1	-1.57474	1.45399	-3.51353	0.000872961	0.0410305	-0.791443
RP11-203P23.2	-1.4177	-2.00879	-3.51295	0.000874507	0.0410415	-0.672097
AC002451.3	-1.10785	-0.912332	-3.51014	0.000882132	0.0413374	-0.690399
TMEM82	-1.95725	-0.873064	-3.50861	0.000886305	0.0414709	-0.7075
KIF3C	0.649135	4.49528	3.50311	0.000901485	0.0421182	-0.929795
COX6A1P2	1.12882	1.87826	3.50247	0.000903281	0.0421392	-0.765029
NTRK3	-1.19095	4.54393	-3.50084	0.000907811	0.0422875	-0.982059
A4GNT	-1.23984	0.84711	-3.49966	0.000911134	0.0423793	-0.78967
DDIT3	0.89862	4.83393	3.49805	0.000915675	0.0425272	-0.954057
PDE7B	-0.809603	3.82204	-3.49736	0.000917609	0.0425415	-0.956956
ESPN	-1.60348	2.99973	-3.4968	0.000919182	0.0425415	-0.93317
FAM96B	0.563626	3.6851	3.49646	0.000920159	0.0425415	-0.905753
RP11-883G14.1	-1.6493	-2.09149	-3.49602	0.000921417	0.0425415	-0.717221
RNF183	-1.67689	0.616465	-3.49418	0.000926647	0.0427173	-0.804308
ERP27	-1.20677	1.28756	-3.49359	0.000928331	0.0427173	-0.831779
C2orf71	-1.71117	-1.26625	-3.49311	0.00092971	0.0427173	-0.735121
RP11-736K20.4	-0.664304	3.60597	-3.49277	0.000930684	0.0427173	-0.953604
RP11-295G20.2	1.04407	-0.785741	3.49195	0.000933029	0.0427622	-0.728018
KRT19P2	-1.34228	-0.426717	-3.49002	0.0009386	0.0429369	-0.763058
HIST2H3A	1.82102	1.97258	3.48968	0.000939582	0.0429369	-0.785162
UBE2S	0.727454	3.19061	3.48811	0.00094413	0.0430818	-0.889613
DNAAF5	0.750446	5.62379	3.48677	0.000948033	0.0431895	-1.02183
SLC35E1P1	-0.755408	0.731443	-3.48573	0.000951056	0.0431895	-0.809614
PRICKLE3	0.755671	3.12425	3.4855	0.000951748	0.0431895	-0.892904
FGGY	-0.657927	3.79289	-3.48498	0.000953247	0.0431895	-0.985736
TMEM105	-1.7218	-2.33228	-3.48494	0.000953389	0.0431895	-0.746182
RP1-27K12.2	-2.09949	-1.94305	-3.48345	0.000957761	0.0433248	-0.754788
SLC28A2	-1.42618	-1.18807	-3.48037	0.000966866	0.0436506	-0.768661
RP13-895J2.3	-1.82082	-0.0631039	-3.48007	0.000967751	0.0436506	-0.814126
AGBL4	-1.17937	1.01442	-3.47919	0.000970372	0.0437058	-0.853623
AC026471.6	-1.81286	-0.867416	-3.47707	0.000976735	0.0438837	-0.790559
RP13-33H18.1	-0.923859	1.35763	-3.47694	0.000977125	0.0438837	-0.871408
TEK	-1.12694	3.75689	-3.47533	0.000981945	0.044037	-1.02322
SEPHS2	1.18495	7.88519	3.47423	0.000985288	0.0440972	-1.10604
RAPGEF3	-1.03882	6.24876	-3.47396	0.000986106	0.0440972	-1.1005
ALDH6A1	-1.03337	6.01964	-3.47232	0.000991071	0.044256	-1.10071
XXbac-BPG283O16.9	-0.642227	4.40274	-3.47139	0.000993902	0.0442886	-1.05229
SERPINA4	-1.67478	-0.884712	-3.47107	0.00099487	0.0442886	-0.805135
RP11-161H23.5	1.16938	3.29455	3.47069	0.000996044	0.0442886	-0.930787
OR51M1	-1.2356	-0.660724	-3.46773	0.00100512	0.0446288	-0.812701
VPS26AP1	-1.28209	-0.985114	-3.46688	0.00100776	0.0446827	-0.807472
ABHD17C	-0.575713	3.46426	-3.46576	0.00101122	0.0447727	-1.02063
MTHFD1P1	-0.882767	1.39323	-3.46318	0.00101925	0.0450643	-0.91075
POLR3KP1	-1.58329	-3.20839	-3.46234	0.00102188	0.045117	-0.810949
PROX1	-1.14974	3.66992	-3.46076	0.00102684	0.0451819	-1.05916
FBLN5	-1.1831	6.32528	-3.4605	0.00102768	0.0451819	-1.14172
DNALI1	-0.804456	3.58759	-3.46041	0.00102794	0.0451819	-1.04952
ZNF826P	-1.39761	4.16661	-3.46004	0.00102912	0.0451819	-1.08834
PLCXD3	-1.14059	3.21744	-3.45796	0.00103569	0.0454064	-1.04236
TMPRSS4	-2.17721	2.68605	-3.45704	0.00103862	0.045471	-1.0416
GMNC	-1.63385	-0.0764079	-3.45628	0.00104105	0.0455138	-0.875904
TUBB2A	1.30249	5.51914	3.45474	0.00104595	0.0456643	-1.09577
RP13-143G15.4	-0.79118	2.14812	-3.45325	0.00105074	0.0458096	-0.978899
RP11-413G15.1	-1.41683	-2.04041	-3.45095	0.00105816	0.0460193	-0.835732
PLEKHD1	-1.27791	0.143102	-3.45031	0.00106024	0.0460193	-0.892647
LRRC19	-1.16972	3.45151	-3.44975	0.00106206	0.0460193	-1.08167
MME-AS1	-1.72856	-0.919364	-3.44946	0.001063	0.0460193	-0.863018
ALDOA	0.92703	9.18504	3.44902	0.00106441	0.0460193	-1.19688
FUT6	-2.16536	4.22016	-3.44892	0.00106477	0.0460193	-1.13057
SCAI	-0.56635	4.4656	-3.44859	0.00106584	0.0460193	-1.117
CDH19	-1.63194	-1.56338	-3.44662	0.00107228	0.0462336	-0.853568
CCDC7	-0.639734	3.47451	-3.44574	0.00107515	0.0462934	-1.07965
ERRFI1	-0.910344	5.5073	-3.44527	0.00107669	0.0462964	-1.16393
BDNF	-0.773072	1.72229	-3.44429	0.00107993	0.0463551	-0.977279
RP11-728F11.4	-1.07986	0.830835	-3.44374	0.00108177	0.0463551	-0.93866
C7	-1.87692	7.55871	-3.44351	0.0010825	0.0463551	-1.21099
UG0898H09	-1.74493	-2.12882	-3.44286	0.00108465	0.0463799	-0.857907
APOM	-0.96276	1.31528	-3.44202	0.00108746	0.0463799	-0.9686
OTX1	2.02812	-1.94519	3.44196	0.00108766	0.0463799	-0.871597
RP11-395M19.1	-1.77849	-0.795922	-3.44155	0.00108901	0.0463799	-0.889056
MTURN	-0.96896	6.35296	-3.44021	0.00109348	0.0465035	-1.19804
C9orf69	0.693514	5.04861	3.43979	0.00109488	0.0465035	-1.13397
AMY2B	-0.678318	4.81182	-3.43885	0.00109804	0.0465743	-1.15913
EYA4	-1.58481	2.56768	-3.43357	0.00111587	0.0472667	-1.08681
PXDC1	0.688098	5.56743	3.43167	0.00112235	0.0474771	-1.17736
SLC38A7	0.553822	5.48848	3.4289	0.00113189	0.0476596	-1.18598
ZNF209P	-1.5826	-0.905532	-3.4286	0.00113291	0.0476596	-0.917284
PRELID1P4	-1.10632	-1.11169	-3.42794	0.00113522	0.0476596	-0.90576
NTSR1	-1.46877	0.766816	-3.42723	0.00113768	0.0476596	-0.990557
SLC22A12	-2.33062	3.9292	-3.42693	0.0011387	0.0476596	-1.18531
CCDC171	-0.545376	3.5041	-3.42635	0.00114072	0.0476596	-1.1327
AP001187.9	-1.35623	1.34125	-3.42623	0.00114113	0.0476596	-1.02479
ZNF804B	-1.98225	-0.849464	-3.42615	0.00114141	0.0476596	-0.932402
MYLK3	-1.07597	0.0778965	-3.42601	0.00114191	0.0476596	-0.950076
NRSN2	0.562851	4.62862	3.42574	0.00114283	0.0476596	-1.15873
BYSL	0.60572	2.8341	3.42558	0.00114342	0.0476596	-1.04727
DDC-AS1	-1.70054	-1.50811	-3.42348	0.00115074	0.0479009	-0.917258
NACC1	0.690207	6.18965	3.42086	0.00115996	0.0482207	-1.22688
LIPH	-1.11136	2.01659	-3.42028	0.00116201	0.0482421	-1.07501
FTCD	-1.92385	3.9196	-3.419	0.00116653	0.0483656	-1.20113
SNX8	0.990317	6.03086	3.41488	0.00118129	0.0488127	-1.2334
CTC-527H23.3	1.53269	-1.954	3.41478	0.00118163	0.0488127	-0.937694
RP11-507K2.2	-0.90551	-0.230079	-3.41468	0.001182	0.0488127	-0.965356
RP3-388N13.3	1.53897	-3.08791	3.41336	0.00118673	0.0489436	-0.952736
RP11-279F6.1	-1.3122	1.98932	-3.41263	0.0011894	0.048989	-1.09986
RP11-933H2.4	-0.897738	2.13585	-3.41144	0.00119368	0.0490784	-1.0977
ALDH1A2	-1.45615	3.8275	-3.41116	0.0011947	0.0490784	-1.2133
C21orf62	-1.2064	2.59641	-3.40953	0.00120064	0.0492577	-1.1448
SLC25A51	0.53325	4.38792	3.40839	0.00120483	0.0493238	-1.19526
RP11-9E17.1	-0.95397	3.1913	-3.40823	0.0012054	0.0493238	-1.17845
RP11-336F14.1	-1.89335	-1.73746	-3.40721	0.00120914	0.049412	-0.957717
DPY19L2	-0.940472	4.47453	-3.40589	0.00121399	0.0494851	-1.24476
LINC00310	-1.1267	1.14139	-3.40587	0.00121409	0.0494851	-1.0621
RAB32	1.00446	4.66259	3.40535	0.00121599	0.049498	-1.2044
AC013463.2	-1.77038	3.5716	-3.40477	0.00121815	0.0495191	-1.22498
TMEM232	-0.712916	2.09123	-3.40436	0.00121967	0.0495191	-1.11058
PFKP	0.905426	6.35054	3.39992	0.00123623	0.050082	-1.28722
GBA	0.691971	5.83103	3.39941	0.00123812	0.050082	-1.2765
WT1	-1.7988	1.74277	-3.39936	0.00123833	0.050082	-1.13534
TFAP2A-AS1	-1.37655	-1.0894	-3.39694	0.00124744	0.0503854	-0.992492
TRIM50	-1.62013	0.0556746	-3.39547	0.001253	0.0505448	-1.0455
LSS	0.934705	6.26412	3.39496	0.00125496	0.0505584	-1.29773
CCDC146	-0.73446	2.97985	-3.39366	0.00125991	0.0506928	-1.19824
NHLRC4	-1.15972	1.41739	-3.39292	0.00126274	0.0507416	-1.11307
KRTAP5-8	-1.48758	-1.27004	-3.3919	0.00126665	0.0508034	-1.00265
SLC14A1	-1.18889	2.23309	-3.39167	0.00126753	0.0508034	-1.17022
GFRA1	-1.36664	5.00479	-3.39084	0.00127075	0.0508674	-1.31027
GM2A	0.965863	7.04568	3.38882	0.00127853	0.0510672	-1.33315
RP1-60N8.1	-0.964792	1.9578	-3.3887	0.00127901	0.0510672	-1.15355
CCDC30	-0.744622	4.25416	-3.38468	0.00129467	0.0515296	-1.2918
MRPS6	-0.679639	5.08435	-3.38467	0.00129471	0.0515296	-1.3202
CITF22-49E9.3	1.68562	-0.0836627	3.38446	0.00129552	0.0515296	-1.0092
GSTO2	-1.06354	3.50903	-3.38398	0.0012974	0.0515388	-1.26476
RP4-530I15.6	-1.57865	-1.72022	-3.38354	0.00129914	0.0515423	-1.01648
PKHD1	-1.94998	7.65777	-3.38272	0.00130238	0.0515567	-1.38342
CSNK1D	0.438915	7.70006	3.38261	0.00130279	0.0515567	-1.36937
KLHDC1	-0.695452	2.04798	-3.38153	0.00130709	0.0516614	-1.1677
RP11-356J5.13	-0.845642	-0.0154453	-3.37855	0.0013189	0.0520625	-1.07007
RP11-9H20.2	-0.828052	2.09422	-3.37653	0.001327	0.0522751	-1.18953
RP11-33B1.1	-0.463158	4.19363	-3.37637	0.00132763	0.0522751	-1.30617
HNRNPA3P7	-0.793058	0.0718039	-3.37416	0.00133654	0.0524946	-1.08467
CTA-246H3.11	-0.938744	-0.32372	-3.37376	0.00133817	0.0524946	-1.07173
LINC01537	-1.35747	-0.52139	-3.37374	0.00133823	0.0524946	-1.07157
MAP7D1	0.777637	6.35627	3.37199	0.00134534	0.0527073	-1.36657
RP11-1060G2.2	-1.12001	-0.00353102	-3.37134	0.00134799	0.0527436	-1.09583
C9orf173	-1.02001	0.897008	-3.37093	0.00134964	0.0527436	-1.13911
NCAPH	1.42418	0.333051	3.36954	0.00135532	0.0528997	-1.05815
SYT7	-1.30415	2.17453	-3.36757	0.00136342	0.0531134	-1.23373
NEK3	-0.446132	3.5097	-3.36711	0.00136531	0.0531134	-1.29414
CPEB1	1.1216	5.22787	3.36697	0.00136588	0.0531134	-1.33535
HOXB5	-0.794778	3.53354	-3.36577	0.00137084	0.0532269	-1.30977
MED10	0.427452	3.31452	3.36544	0.0013722	0.0532269	-1.25193
LINC00092	-0.808944	0.528488	-3.36186	0.0013871	0.0537382	-1.13776
ASS1P10	-1.3756	-1.44978	-3.35958	0.00139669	0.0539871	-1.08221
LCN12	-1.06907	3.18069	-3.35951	0.00139698	0.0539871	-1.31222
HOXD11	-1.47377	1.98836	-3.35879	0.00140002	0.0540382	-1.25316
DAGLA	0.870827	4.46905	3.35809	0.00140299	0.054086	-1.32738
PCGF1	0.536887	2.7025	3.3573	0.00140635	0.0541487	-1.23002
SCTR	-1.39106	1.74643	-3.35622	0.00141093	0.0542583	-1.24125
OR7E47P	-1.36936	-0.413876	-3.3557	0.00141313	0.0542763	-1.12652
MTAPP2	-1.11962	-0.0666531	-3.35446	0.00141844	0.0544134	-1.13843
ANPEP	-1.47	5.92026	-3.35073	0.00143446	0.0549606	-1.44501
PLS3-AS1	-1.51024	-0.942387	-3.34942	0.00144011	0.0551097	-1.12475
FSCN1	1.09689	6.0375	3.34882	0.00144273	0.0551426	-1.41654
PPP1R1B	-1.26478	-0.0941914	-3.34745	0.00144869	0.055303	-1.16034
PTP4A3	1.01366	5.6477	3.34684	0.00145134	0.0553364	-1.40953
PPP2R2B	-0.992471	2.17911	-3.34626	0.00145388	0.0553658	-1.2834
LARP1	0.452599	8.4503	3.34526	0.00145825	0.055465	-1.48371
RP11-522L3.9	-1.19197	-1.45729	-3.34474	0.00146053	0.0554841	-1.11824
DCDC1	-1.02848	2.04803	-3.34378	0.00146476	0.055539	-1.28359
RAP2C-AS1	-0.606562	2.39898	-3.34361	0.00146552	0.055539	-1.29247
ZNF214	-0.780488	2.34805	-3.34154	0.00147468	0.0558185	-1.3025
DPY19L3	-0.475594	4.66638	-3.33977	0.00148253	0.0560477	-1.42657
ATP1A1	-0.955396	8.36607	-3.33806	0.00149017	0.0562081	-1.51057
DNAJC25-GNG10	0.894937	2.65237	3.33802	0.00149036	0.0562081	-1.26285
SSC4D	-1.05986	0.667846	-3.33615	0.00149877	0.0564572	-1.22241
RP11-438F14.10	-1.64886	-2.47347	-3.33537	0.00150228	0.0565214	-1.13406
RP11-311F12.1	-1.70434	-1.20484	-3.33402	0.00150837	0.0566118	-1.16059
LRRC37A3	-0.576562	4.7522	-3.33386	0.00150912	0.0566118	-1.44749
LINC00599	-1.37035	-2.08072	-3.33311	0.0015125	0.0566118	-1.14111
DRICH1	-1.25266	-0.157886	-3.33296	0.00151318	0.0566118	-1.19416
AC005083.1	-1.37826	-0.50171	-3.33284	0.00151372	0.0566118	-1.18363
HOXB-AS2	-0.805716	1.87022	-3.32747	0.00153832	0.0574528	-1.30827
RP11-693M3.1	-0.939459	2.81863	-3.32671	0.00154182	0.0574528	-1.37873
SLC29A1	0.914037	6.77768	3.32637	0.0015434	0.0574528	-1.50205
DPF3	-1.08278	1.50984	-3.32627	0.0015439	0.0574528	-1.29873
RASSF10	-1.39907	1.12924	-3.32594	0.00154539	0.0574528	-1.28564
HCAR2	-0.981071	0.307497	-3.32548	0.00154754	0.0574547	-1.23038
THRB-IT1	-1.00272	1.52517	-3.32514	0.00154911	0.0574547	-1.29865
GPR116	-1.02287	6.29617	-3.32342	0.00155713	0.0576509	-1.52418
NPHP3	-0.443986	5.20036	-3.32319	0.00155822	0.0576509	-1.48982
EDAR	-1.03216	0.00817575	-3.32282	0.00155993	0.0576509	-1.22419
RNF144B	-0.760299	5.12955	-3.32243	0.00156177	0.0576509	-1.49587
RP11-522B15.3	-0.782007	3.00415	-3.32194	0.00156404	0.0576667	-1.39798
NAGPA	0.666672	4.6841	3.32069	0.0015699	0.0577949	-1.44753
RP13-204A15.5	-0.846071	1.09698	-3.32042	0.00157121	0.0577949	-1.28308
MCOLN1	0.719623	4.87143	3.31902	0.00157779	0.0579689	-1.46107
OR1F12	-1.40587	-1.93244	-3.31839	0.00158077	0.0580103	-1.18062
HOXD8	-1.1978	3.96519	-3.3174	0.00158549	0.0581154	-1.47339
RP11-7F18.2	-0.796542	-0.0552148	-3.31609	0.00159169	0.0582745	-1.23292
OR2T34	-2.03509	-0.928149	-3.31527	0.00159561	0.0583054	-1.22323
AC097662.2	-0.740885	1.65199	-3.31513	0.00159626	0.0583054	-1.32532
RALGPS1	-0.493777	4.99911	-3.31415	0.00160096	0.0584088	-1.50942
CCM2	0.381058	5.13863	3.31376	0.00160282	0.0584088	-1.49721
TBC1D14	0.603058	7.18955	3.31228	0.00160997	0.0585521	-1.55391
DTYMK	0.571712	3.21509	3.3118	0.00161225	0.0585521	-1.38715
DYRK3	0.905338	3.7104	3.31178	0.00161237	0.0585521	-1.40729
SPATA6L	-0.828908	2.68769	-3.30927	0.00162451	0.0589249	-1.41214
SLC6A18	-2.27097	-0.625024	-3.30858	0.00162787	0.0589701	-1.2605
MAMDC2-AS1	-0.887007	2.08011	-3.30824	0.00162953	0.0589701	-1.37873
ADAM20P1	-0.805833	1.22255	-3.30645	0.00163827	0.0592179	-1.32649
PTGER3	-1.40595	5.78536	-3.30094	0.00166546	0.0601314	-1.57909
LAGE3	1.08144	2.4578	3.2999	0.00167066	0.0602495	-1.35139
ZNF436-AS1	-0.661087	2.76562	-3.29805	0.00167993	0.0604726	-1.44057
RPUSD1	0.711669	3.95343	3.29789	0.00168071	0.0604726	-1.46555
VARS	0.739393	5.59609	3.29716	0.0016844	0.0605358	-1.55181
CCDC176	-0.61469	2.67261	-3.29509	0.00169483	0.0608347	-1.44394
GPRC6A	-1.55548	-2.71894	-3.29474	0.0016966	0.0608347	-1.23615
AC060834.2	-1.66503	-1.50237	-3.29289	0.00170598	0.0611009	-1.25818
FAAH2	-1.16225	1.19527	-3.29233	0.00170883	0.0611333	-1.37458
UBE2I	0.412898	6.21836	3.29175	0.00171182	0.0611701	-1.59058
RPL7P52	-0.763205	0.976817	-3.29126	0.00171431	0.0611732	-1.35219
USF2	0.619796	6.74928	3.29089	0.00171617	0.0611732	-1.60309
C1orf226	-0.818672	3.12681	-3.29031	0.00171915	0.0611732	-1.49409
MPG	1.00205	4.68294	3.2902	0.00171972	0.0611732	-1.52008
MOGAT3	-1.73044	-2.23328	-3.28833	0.00172932	0.0613013	-1.2564
CTB-107G13.1	-1.35083	-2.99231	-3.28765	0.00173285	0.0613013	-1.25411
GABRB3	-1.67692	1.43112	-3.28759	0.00173315	0.0613013	-1.41845
DEPTOR	-0.723787	4.26891	-3.28744	0.00173392	0.0613013	-1.56115
SLC52A2	0.868895	4.43547	3.28735	0.0017344	0.0613013	-1.51841
WBSCR17	-1.43573	1.46048	-3.28722	0.00173507	0.0613013	-1.41264
LINC01158	-1.16054	0.3879	-3.28558	0.00174358	0.0615324	-1.34656
PCAT14	-1.52106	-1.42524	-3.28411	0.00175124	0.0617331	-1.28077
MARK3P1	-0.979303	-0.778693	-3.28302	0.00175691	0.0618632	-1.29421
NOP14	0.484266	4.66426	3.28243	0.00176001	0.0619028	-1.55951
MARS	0.394253	5.82094	3.28015	0.00177197	0.0622493	-1.61224
TRPM6	-1.55178	1.50004	-3.2798	0.00177384	0.0622493	-1.44063
RP11-165F24.5	-1.27862	-1.97345	-3.27928	0.00177658	0.0622756	-1.27902
SLC5A11	-1.66615	-0.673568	-3.278	0.00178336	0.0624101	-1.32618
GNG12-AS1	-0.795986	1.17742	-3.27781	0.0017844	0.0624101	-1.39926
MTND2P23	-1.48565	-1.3041	-3.27365	0.00180657	0.0630396	-1.31068
RP11-390P2.4	-0.810957	-0.0366243	-3.27331	0.00180839	0.0630396	-1.34692
DDC	-1.87531	2.77359	-3.27331	0.00180844	0.0630396	-1.5508
PRELID1	0.661842	5.02122	3.27255	0.00181249	0.0631013	-1.5975
PTDSS2	0.620842	5.31462	3.27214	0.00181472	0.0631013	-1.61169
LINC00271	-0.970635	0.670198	-3.27185	0.00181626	0.0631013	-1.39079
NRXN1	-1.56775	0.14245	-3.27139	0.00181879	0.0631193	-1.37962
EPS8L1	-1.33738	2.8079	-3.27016	0.00182541	0.0632163	-1.54325
RP11-61G19.1	-1.70281	-2.48328	-3.26987	0.00182702	0.0632163	-1.3003
GLYATL1	-1.93875	3.42866	-3.26961	0.00182839	0.0632163	-1.59463
PEG3	-1.12854	3.27602	-3.26938	0.00182966	0.0632163	-1.56968
RP3-368B9.2	-1.58288	-3.08466	-3.26861	0.00183383	0.0632531	-1.30152
NRG3	1.10291	4.17486	3.26781	0.00183821	0.0632531	-1.54369
COL4A3	-0.782039	6.46743	-3.26765	0.00183912	0.0632531	-1.67804
ENOX1-AS1	-1.16832	-0.133025	-3.26764	0.00183917	0.0632531	-1.3668
RP11-759A24.2	-0.830091	2.74738	-3.26733	0.00184083	0.0632531	-1.53069
EPHX4	1.90622	-0.800264	3.26661	0.00184481	0.0633201	-1.30671
NPY1R	-1.34471	4.62026	-3.26605	0.00184785	0.0633552	-1.64314
MGC27382	-1.31842	-0.882165	-3.26486	0.00185436	0.0635089	-1.34448
CHCHD10	0.83934	6.03634	3.26406	0.00185881	0.0635915	-1.65469
MTNR1A	-1.31065	-0.14222	-3.26265	0.00186662	0.0637891	-1.38214
AQP5	-1.70553	-1.65479	-3.26003	0.00188118	0.0642164	-1.33936
OR5BK1P	-0.960398	-0.441492	-3.259	0.00188694	0.0643336	-1.36935
CERS2	0.520839	7.54441	3.25868	0.00188872	0.0643336	-1.70862
RP11-545G3.1	-0.936575	0.264907	-3.2581	0.00189198	0.0643745	-1.40485
TUBA1C	0.884027	5.95963	3.25752	0.00189519	0.064414	-1.66961
RP11-285G1.2	-0.954324	0.132911	-3.2568	0.00189927	0.0644826	-1.40172
GABRP	-1.5884	1.95508	-3.25625	0.00190239	0.0645183	-1.53453
RP11-1109F11.3	-0.747676	2.30552	-3.25557	0.00190623	0.0645786	-1.53017
ESRRG	-1.70203	4.79074	-3.25441	0.00191274	0.0646287	-1.68439
MRPL12	0.927781	4.45082	3.25419	0.001914	0.0646287	-1.60805
UBE2Q1	0.668599	5.33908	3.25394	0.00191546	0.0646287	-1.66211
CAMKK1	1.06441	4.8661	3.25385	0.00191597	0.0646287	-1.62792
RP11-472F14.4	-1.39551	-0.642652	-3.25302	0.00192068	0.0647179	-1.38669
STRA6	-1.26984	2.18824	-3.2524	0.00192417	0.0647373	-1.55024
CIT	-0.786095	5.29823	-3.25219	0.00192539	0.0647373	-1.69273
AGPAT6	0.620087	7.22237	3.25176	0.00192784	0.0647501	-1.72009
FAM13A-AS1	-0.589076	3.79558	-3.25091	0.0019327	0.064844	-1.63364
FBXO10	0.552583	4.81024	3.24719	0.00195412	0.0654923	-1.66015
AC012531.25	-0.61508	4.27552	-3.24574	0.00196249	0.0656171	-1.67094
RP3-467K16.2	-1.55062	-2.18015	-3.24553	0.00196375	0.0656171	-1.36371
C1orf210	-1.64282	1.3221	-3.24525	0.00196539	0.0656171	-1.52445
ITGA9-AS1	-0.708093	3.30086	-3.24494	0.00196719	0.0656171	-1.62371
RPL9P16	-1.31726	-1.63656	-3.24474	0.00196832	0.0656171	-1.37337
CIAPIN1P	-0.948458	-0.51839	-3.24264	0.0019806	0.0659561	-1.40823
RP11-352D13.6	-1.14789	2.94781	-3.24119	0.00198909	0.0661683	-1.62496
DNAJC9-AS1	-0.952154	0.81385	-3.24044	0.00199355	0.0662464	-1.48129
BDP1P	-1.92131	-2.04203	-3.23783	0.00200899	0.0666886	-1.39072
ERBB4	-1.62711	4.86128	-3.23712	0.00201321	0.0667579	-1.73226
OR2A25	-1.49502	-2.53117	-3.23655	0.00201659	0.0667609	-1.38255
CD8BP	-1.62528	-2.36205	-3.23638	0.00201756	0.0667609	-1.38547
RP11-284B18.3	-0.885144	-0.382463	-3.23096	0.00205014	0.0677097	-1.44412
LNX1	-0.816965	3.00749	-3.23089	0.00205056	0.0677097	-1.647
ZNF259P1	-0.897931	0.832795	-3.22981	0.00205713	0.0678408	-1.50921
ZMAT1	-0.670849	5.51849	-3.22952	0.00205887	0.0678408	-1.75905
LINC01182	-1.25834	-1.36802	-3.22841	0.0020656	0.0679911	-1.42124
MAGI2	-0.666409	5.48807	-3.22193	0.00210549	0.0692312	-1.77805
SIM1	-1.48824	4.88025	-3.2203	0.00211558	0.0694858	-1.7772
RP11-632P5.1	-1.38577	-2.06057	-3.21965	0.00211964	0.0694858	-1.42949
IPCEF1	-0.707959	3.05663	-3.21961	0.00211989	0.0694858	-1.67479
RPS2	0.685	8.32443	3.21865	0.00212591	0.0695572	-1.82797
SDF2L1	0.838916	2.76775	3.21833	0.0021279	0.0695572	-1.598
TRIO	0.521786	8.08826	3.2182	0.00212874	0.0695572	-1.82727
RP5-1159O4.2	-1.04306	0.725959	-3.21733	0.00213417	0.0696024	-1.54174
LRRIQ1	-0.953843	1.91263	-3.21677	0.00213772	0.0696024	-1.61472
RP11-311D14.1	-1.74506	-1.72346	-3.21654	0.00213919	0.0696024	-1.44918
IHH	-1.27046	-0.133182	-3.21597	0.00214279	0.0696024	-1.50297
ZNF763	-0.66657	2.29929	-3.2158	0.00214386	0.0696024	-1.63128
RP11-442O1.4	-1.43082	-1.16406	-3.21572	0.00214435	0.0696024	-1.4631
ACBD3	0.622555	5.90276	3.21551	0.00214568	0.0696024	-1.78577
RP11-355F16.1	-1.06459	0.527575	-3.21416	0.00215419	0.069806	-1.53948
CCDC178	-1.58364	-0.0366686	-3.2136	0.00215778	0.0698501	-1.52366
TMEM252	-1.66298	2.43702	-3.21156	0.00217078	0.0701981	-1.68883
DEXI	0.863727	6.71349	3.2107	0.00217622	0.0703017	-1.81634
CYP4F12	-1.36708	0.765957	-3.21	0.00218076	0.070308	-1.57394
SLC44A4	-1.71341	2.1046	-3.20997	0.00218091	0.070308	-1.67143
HIST3H2A	1.34375	2.53079	3.20777	0.0021951	0.0706218	-1.59177
LINC00222	-1.04262	-0.00551907	-3.20776	0.00219516	0.0706218	-1.52532
TMPRSS3	-1.36014	0.347074	-3.20678	0.00220145	0.0707065	-1.55558
RP11-327J17.9	-1.21519	1.04332	-3.20654	0.00220302	0.0707065	-1.5956
SLC23A3	-0.955888	4.03405	-3.2063	0.00220457	0.0707065	-1.77386
SOCS1	1.17031	3.71168	3.20584	0.00220755	0.0707298	-1.67457
PSMB10	0.749176	4.35871	3.20537	0.00221062	0.0707557	-1.73994
LHFPL3-AS2	-1.66997	3.3596	-3.20401	0.0022195	0.0709673	-1.763
S100A14	-1.52602	0.136317	-3.20327	0.0022243	0.0710042	-1.55819
TNFRSF10B	0.453427	6.74229	3.20303	0.0022259	0.0710042	-1.84448
SLC5A7	-1.51262	-1.63942	-3.20279	0.00222746	0.0710042	-1.48335
SRRM3	1.56553	1.77611	3.20198	0.00223275	0.0711004	-1.55183
OVOL2	-1.39404	-0.304313	-3.20031	0.00224375	0.0713781	-1.53786
LINC00939	-1.53332	-0.172211	-3.19923	0.00225085	0.0714636	-1.55374
PODXL	-1.00077	6.94085	-3.19921	0.002251	0.0714636	-1.87436
SMOX	0.854723	3.48757	3.19612	0.00227149	0.0720409	-1.70225
CTB-12A17.2	-1.16029	0.527287	-3.19328	0.0022905	0.0725704	-1.59463
LOC100421166	-1.1096	1.22718	-3.18806	0.00232582	0.0736148	-1.65132
XPO6	0.357223	6.38082	3.18756	0.00232924	0.0736487	-1.87886
CBX8	0.750989	2.38875	3.187	0.00233303	0.0736918	-1.65699
METTL20	-0.504322	3.39591	-3.18667	0.00233531	0.0736918	-1.77872
CCDC129	-1.24915	-1.36983	-3.18584	0.00234096	0.0737957	-1.5279
AC090044.2	-1.41325	-1.39781	-3.18423	0.00235201	0.0740693	-1.53384
ZNF471	-0.6592	4.17928	-3.18332	0.0023583	0.0741927	-1.83607
EFNA3	1.1679	-0.202796	3.18217	0.00236626	0.0743685	-1.52822
PKMYT1	1.65818	0.766147	3.18059	0.00237723	0.0746384	-1.55256
CHAD	-0.936541	2.40399	-3.18	0.00238133	0.0746838	-1.74411
IMMP2L	-0.410586	3.37655	-3.1797	0.00238345	0.0746838	-1.79112
EIF4EBP1	0.841298	2.93617	3.17765	0.00239776	0.0749862	-1.71626
CDCA5	1.37427	0.781373	3.17763	0.00239789	0.0749862	-1.57133
AADACL4	-1.48266	-2.64153	-3.17718	0.00240104	0.0750096	-1.52898
IRX6	1.16298	5.73748	3.17648	0.002406	0.0750899	-1.8715
CTD-3105H18.8	-1.15604	-1.13173	-3.17581	0.00241068	0.0751607	-1.5596
C11orf63	-0.888898	2.77073	-3.17532	0.00241418	0.075195	-1.78158
PGAM5	0.516363	4.63063	3.17485	0.00241746	0.0752225	-1.84438
UHRF2P1	-0.945375	3.02164	-3.17311	0.00242976	0.0755302	-1.80641
DPPA2P4	-1.36096	-3.37992	-3.17273	0.00243252	0.0755408	-1.53759
CMTM4	-0.605909	6.44834	-3.16921	0.00245764	0.0762028	-1.94222
TDGF1	-1.84744	-0.607454	-3.16906	0.0024587	0.0762028	-1.61628
RP11-132E11.2	-1.56062	-3.3065	-3.16698	0.00247365	0.076519	-1.55169
RP11-334L9.1	-1.40498	-2.53054	-3.16696	0.0024738	0.076519	-1.5547
SSNA1	0.756095	4.12417	3.16618	0.00247946	0.0765459	-1.82758
RP11-1114A5.5	-0.820883	0.863771	-3.16617	0.00247956	0.0765459	-1.6771
LINC00948	-1.46022	-2.91038	-3.16488	0.00248889	0.0767583	-1.55765
YKT6	0.472668	5.555	3.16356	0.00249846	0.0769775	-1.91762
MYH8	-1.68072	-2.1215	-3.1625	0.00250619	0.0771164	-1.5747
TOMM34	0.547257	4.30767	3.16223	0.00250817	0.0771164	-1.86267
SRD5A3	0.704902	3.10428	3.16189	0.00251068	0.0771164	-1.77438
C12orf60	-0.657838	0.95231	-3.1616	0.00251282	0.0771164	-1.68779
C11orf84	0.494593	3.64312	3.16004	0.00252424	0.0773911	-1.82464
TMEM132A	1.11279	4.54209	3.15902	0.00253176	0.0775457	-1.85866
NOC4L	0.62257	3.04359	3.15778	0.00254095	0.0777512	-1.78266
PDE8B	-0.625438	3.46091	-3.15719	0.00254534	0.0778095	-1.86493
ZNRF3-IT1	-1.18785	0.391682	-3.15481	0.00256304	0.078274	-1.6876
POLR3K	0.762849	2.43014	3.15403	0.00256888	0.0783758	-1.74745
NIPSNAP3B	-0.535672	3.01012	-3.15329	0.00257437	0.0784669	-1.84194
PDGFRA	-1.17693	5.64223	-3.14988	0.00260008	0.0790335	-1.98237
AIMP1P1	-1.00961	-0.925229	-3.14986	0.00260021	0.0790335	-1.63082
LRP8	0.925237	3.20237	3.14952	0.00260279	0.0790335	-1.8042
MARVELD2	-0.984069	3.68143	-3.14949	0.00260306	0.0790335	-1.91057
IGF2BP2-AS1	-1.10247	0.150187	-3.14756	0.00261767	0.0794001	-1.69019
EPB41L4B	-1.04883	2.00198	-3.14657	0.00262525	0.0795529	-1.80941
AC092162.1	-1.1509	0.402517	-3.14567	0.00263208	0.0796189	-1.71188
FAM50A	0.607922	4.66272	3.14514	0.00263616	0.0796189	-1.92299
GRAMD1C	-1.07748	3.98747	-3.14505	0.00263689	0.0796189	-1.93862
PNMT	-1.10648	-1.59042	-3.14488	0.00263816	0.0796189	-1.62172
AC007277.3	-1.35316	-2.84586	-3.14462	0.00264014	0.0796189	-1.60698
TACSTD2	-1.75733	4.35009	-3.14292	0.00265322	0.0799363	-1.97014
RP11-517I3.1	-0.793234	1.00107	-3.14084	0.00266934	0.0803446	-1.7498
TIGD4	-0.884187	0.0216515	-3.13993	0.00267637	0.0804789	-1.69846
SMIM22	-1.25755	-1.17375	-3.13861	0.00268671	0.0805606	-1.65393
RNF212B	-1.6124	-1.84495	-3.13858	0.00268689	0.0805606	-1.64002
C9orf173-AS1	-0.956657	1.60071	-3.13846	0.00268782	0.0805606	-1.79787
ABCA6	-0.987176	4.46758	-3.13826	0.00268938	0.0805606	-1.9754
WDR62	1.24419	1.80536	3.13615	0.00270592	0.0808606	-1.73278
RP11-386I14.3	-1.06416	-1.20418	-3.13612	0.00270613	0.0808606	-1.65541
DLG2	-0.742446	3.09979	-3.13599	0.00270715	0.0808606	-1.90209
E2F6	0.471353	3.84151	3.13525	0.002713	0.0809581	-1.90485
KIF5A	1.23217	1.98112	3.13469	0.00271744	0.0810134	-1.74933
RANP4	-1.06611	-0.558768	-3.13382	0.00272432	0.0811413	-1.68805
GLIPR2	0.797969	4.01745	3.13339	0.00272772	0.0811653	-1.90962
HM13	0.430977	6.76248	3.13299	0.00273085	0.0811811	-2.03264
PAQR7	-0.659377	4.75452	-3.13136	0.00274381	0.0814635	-1.99748
RNPEP	0.556058	5.65145	3.13114	0.00274555	0.0814635	-2.00425
OR2F1	-1.40549	-2.55765	-3.12956	0.00275816	0.08176	-1.64602
SLC10A5	-0.794916	1.06927	-3.12897	0.00276289	0.0817761	-1.78508
FBXW5	0.753485	6.5	3.12866	0.00276539	0.0817761	-2.03262
RP11-550I24.3	-1.12257	-1.60027	-3.12851	0.00276654	0.0817761	-1.66259
FOXRED2	0.780954	5.47882	3.12796	0.00277099	0.0818305	-2.00165
MAGI1-AS1	-0.782306	0.607391	-3.12722	0.0027769	0.0818341	-1.75958
SHMT2	0.760922	5.41552	3.12712	0.00277771	0.0818341	-2.00271
BAK1	0.637442	4.086	3.12697	0.00277896	0.0818341	-1.93874
WT1-AS	-1.80032	0.0889476	-3.12537	0.00279182	0.0821086	-1.76396
TEN1	0.682053	2.56649	3.12516	0.00279352	0.0821086	-1.83495
PALM2-AKAP2	1.02229	5.09215	3.12463	0.00279786	0.0821589	-1.98903
ZNF737	-0.540781	5.36313	-3.12423	0.00280108	0.0821765	-2.03385
SIRPAP1	0.955411	0.373201	3.12376	0.00280488	0.0822109	-1.70049
RP11-354K4.1	-1.37875	-2.51839	-3.12289	0.00281199	0.0823422	-1.66226
PLEKHG7	-0.954752	-0.0557195	-3.12183	0.00282063	0.0824555	-1.74134
FAM83F	-1.86545	3.77042	-3.12165	0.0028221	0.0824555	-2.0039
RP11-25O3.1	-1.31232	-3.14133	-3.12107	0.00282687	0.0824555	-1.66287
RP11-207C16.4	-0.893959	-0.586074	-3.12102	0.00282721	0.0824555	-1.71486
AC064875.2	-1.1472	-0.55612	-3.12075	0.00282947	0.0824555	-1.72404
FAM50B	0.687856	3.27059	3.12048	0.00283167	0.0824555	-1.89492
RP11-165F24.2	-1.2303	-0.454021	-3.12014	0.00283449	0.0824609	-1.73234
DHX37	0.55771	4.49741	3.11891	0.00284456	0.082677	-1.98545
HLA-A	1.01566	8.32317	3.11756	0.00285573	0.0829247	-2.09598
EIF3C	0.654806	7.24336	3.11715	0.00285906	0.0829447	-2.08208
KCTD5	0.409232	4.05934	3.11664	0.00286326	0.0829894	-1.97154
AQP1	-1.16073	6.96019	-3.11594	0.00286911	0.0830821	-2.09866
RP1-168L15.6	-0.930201	0.378923	-3.11553	0.00287254	0.0831045	-1.78182
BBOX1	-2.05172	2.95791	-3.11493	0.00287753	0.083172	-1.9873
AXIN1	0.675465	5.92906	3.11397	0.00288553	0.0833263	-2.05587
PRKCQ	-0.877065	2.62388	-3.11266	0.00289648	0.0834897	-1.9353
C4orf48	1.31513	1.93568	3.11265	0.00289652	0.0834897	-1.79847
FIGF	-0.993297	0.296048	-3.11037	0.00291569	0.0839175	-1.79199
RP11-310P5.2	-1.55162	-3.06655	-3.11011	0.00291784	0.0839175	-1.69004
RNF212	-1.13466	1.64435	-3.10993	0.00291941	0.0839175	-1.88237
SLC16A12	-1.57591	5.1266	-3.10909	0.00292643	0.0840422	-2.0815
PCP2	-1.32389	-1.13227	-3.10862	0.00293046	0.0840632	-1.73164
GOLGA3	0.504381	7.53099	3.1081	0.00293487	0.0840632	-2.11279
TUSC7	-1.2293	-1.1226	-3.10806	0.00293522	0.0840632	-1.73152
MAPKAPK2	0.478648	6.77964	3.10737	0.00294108	0.0841354	-2.09975
RP11-567M16.6	-0.457469	2.3533	-3.10689	0.00294509	0.0841354	-1.91377
RP11-849I19.1	-1.87996	-1.25143	-3.10653	0.00294816	0.0841354	-1.745
C1QTNF9B-AS1	1.37855	-0.332771	3.10649	0.00294849	0.0841354	-1.71045
ORC6	0.987162	1.73295	3.10517	0.00295978	0.0843593	-1.81867
HELZ2	0.783754	6.38869	3.10494	0.00296172	0.0843593	-2.09193
C19orf24	0.762868	4.27028	3.10462	0.00296452	0.0843622	-2.00082
PROM1	-1.59326	4.63104	-3.10298	0.00297853	0.0846838	-2.08303
RP11-588H23.3	-0.90345	3.13715	-3.10074	0.00299789	0.0851571	-2.00138
AC004947.2	-1.59239	-1.21682	-3.09993	0.00300488	0.0852782	-1.75707
LINC01137	0.602123	1.85395	3.09958	0.00300792	0.085285	-1.85673
CTC-260E6.3	-0.682853	0.749306	-3.09927	0.00301057	0.085285	-1.83584
PLCZ1	-1.40667	-1.67836	-3.09851	0.00301718	0.0853492	-1.73991
OR2T7	-1.385	-2.91509	-3.09838	0.00301829	0.0853492	-1.71854
EFHD2	0.603092	5.38912	3.09627	0.00303673	0.0857144	-2.08615
NUDT1	0.782033	1.55564	3.09572	0.00304157	0.0857144	-1.84095
MAGI2-AS3	-0.646875	5.75375	-3.09552	0.00304331	0.0857144	-2.12274
CLIP4	0.617773	6.10499	3.09551	0.00304342	0.0857144	-2.11122
VWA3A	-1.45148	-1.54607	-3.09534	0.0030449	0.0857144	-1.75281
TMEM8A	0.9124	6.65976	3.09322	0.00306354	0.0861617	-2.12791
MPP7	-0.910691	3.5116	-3.09229	0.00307174	0.0863078	-2.05021
RP11-65E22.2	-1.25447	-2.19263	-3.09201	0.00307425	0.0863078	-1.74134
RP11-1260E13.2	-0.975695	0.00698386	-3.09168	0.00307715	0.0863119	-1.82107
TJP3	-1.30898	1.69899	-3.09076	0.00308529	0.0863131	-1.94216
TFPT	0.788953	2.40888	3.09069	0.00308592	0.0863131	-1.90791
RP11-33E12.2	-0.737966	1.50332	-3.09056	0.00308709	0.0863131	-1.91016
SLC35A2	0.498428	4.0293	3.09028	0.00308959	0.0863131	-2.03515
KB-208E9.1	-1.00695	-0.207076	-3.08969	0.0030948	0.0863131	-1.8162
COPRS	0.744059	3.74407	3.08968	0.00309493	0.0863131	-2.0062
CTC-321K16.1	-1.49182	-1.18352	-3.0895	0.0030965	0.0863131	-1.78126
SLC35E4	1.18855	2.78058	3.08861	0.00310448	0.0863784	-1.92147
SCD5	-1.07442	4.7325	-3.08846	0.00310576	0.0863784	-2.11674
LZTS2	0.652364	6.83901	3.08831	0.00310712	0.0863784	-2.149
CSMD1	-1.16429	1.97281	-3.0864	0.00312424	0.0867772	-1.96822
BCAS1	-1.3248	-0.0455382	-3.08605	0.00312741	0.0867883	-1.8439
PTCH1	-0.518955	5.30832	-3.08474	0.00313919	0.087012	-2.1357
GPX1	0.696249	6.99297	3.08427	0.00314344	0.087012	-2.16305
DNASE1	-0.498908	6.00707	-3.08395	0.00314633	0.087012	-2.15674
AC005786.7	-2.00324	-0.247748	-3.08392	0.00314659	0.087012	-1.85366
GOLGA2P5	-0.811377	4.83092	-3.08264	0.00315826	0.0872577	-2.13199
AC009166.7	-1.0465	1.94788	-3.08158	0.00316786	0.0874457	-1.97486
AC002366.3	-0.718854	0.705243	-3.08018	0.00318061	0.0877203	-1.88274
VAC14	0.609246	6.30616	3.07924	0.00318923	0.0878807	-2.16077
CSK	0.688867	5.81046	3.07829	0.00319795	0.0880435	-2.14497
RP11-337N6.1	-1.18166	0.157334	-3.07675	0.00321214	0.0883564	-1.8722
RP11-348J24.2	-1.40736	-1.37007	-3.07582	0.00322075	0.0885154	-1.8066
ART4	-1.13005	2.5944	-3.07517	0.00322672	0.0886019	-2.03947
EFR3B	1.24832	5.17373	3.07409	0.00323671	0.0887983	-2.11433
SHANK2-AS3	-0.94649	0.856572	-3.07368	0.00324058	0.0888266	-1.91765
GPC3	-1.44569	3.08657	-3.07277	0.00324906	0.0889812	-2.09055
PRR11	0.98172	0.950724	3.07212	0.00325509	0.0889993	-1.85964
KCNQ1OT1	-0.713037	8.62013	-3.07208	0.00325541	0.0889993	-2.23028
RP11-44F14.10	-1.4272	-2.2625	-3.07104	0.0032652	0.0891418	-1.79324
DHCR7	0.679362	3.86738	3.07092	0.00326632	0.0891418	-2.06754
LINC00924	-1.20132	2.20809	-3.06982	0.00327661	0.0893447	-2.02887
BRINP3	-1.59271	-1.374	-3.06773	0.00329631	0.0897046	-1.83098
CNGB1	1.43256	-2.6056	3.06763	0.00329723	0.0897046	-1.789
RP11-404P21.1	-1.3912	-2.08224	-3.06751	0.00329841	0.0897046	-1.80427
LINC00844	-1.55432	-2.19376	-3.06682	0.00330496	0.0898047	-1.80673
CDC25B	0.640421	5.831	3.06575	0.00331507	0.0900013	-2.18066
RP11-454F8.2	-0.595516	2.45074	-3.06532	0.00331914	0.0900339	-2.03526
MIR99AHG	-1.02924	4.09074	-3.06466	0.00332549	0.0901279	-2.1536
SSTR1	-1.15953	0.693859	-3.06399	0.00333183	0.0902216	-1.93905
C9orf40	0.707926	2.13571	3.06138	0.00335679	0.0907672	-1.96705
CTC-236F12.4	-0.899331	-0.773834	-3.06128	0.00335777	0.0907672	-1.85446
FAAHP1	-1.13593	-0.842339	-3.0608	0.00336237	0.090802	-1.85892
IP6K3	1.2763	3.86668	3.06055	0.00336486	0.090802	-2.06615
RALGDS	0.700717	6.37022	3.05935	0.00337636	0.0908995	-2.21235
DDX3P1	-0.913168	2.75123	-3.0593	0.00337684	0.0908995	-2.08537
ACY3	-1.15725	2.24577	-3.05917	0.00337813	0.0908995	-2.05679
GTSE1	1.51851	1.01532	3.05847	0.0033849	0.0908995	-1.87643
SPOCK2	-0.994979	5.25904	-3.05843	0.00338525	0.0908995	-2.21144
RP11-20I20.2	-1.26409	-1.71068	-3.05827	0.00338684	0.0908995	-1.83426
SORL1	-0.701623	7.13596	-3.05807	0.0033888	0.0908995	-2.2498
WDR66	-0.678784	4.01319	-3.05663	0.00340279	0.0911964	-2.16052
CCDC86	0.527269	3.40374	3.05537	0.00341507	0.0914473	-2.07977
RP11-420L9.5	1.00902	4.38183	3.05501	0.00341856	0.0914491	-2.12243
LINC01135	-1.18256	-0.988552	-3.05457	0.00342287	0.0914491	-1.86921
KHSRP	0.504465	6.72365	3.05427	0.00342581	0.0914491	-2.23763
CASC19	-0.947102	3.25273	-3.05417	0.00342682	0.0914491	-2.13322
FAM53B	0.535523	6.78693	3.05337	0.00343465	0.0915184	-2.24113
ABCD1	0.663131	5.20299	3.05305	0.00343777	0.0915184	-2.18836
HSPB2	0.966604	3.68047	3.05301	0.00343819	0.0915184	-2.08445
RP5-1112D6.7	-0.724575	3.02325	-3.05189	0.00344915	0.0917322	-2.11603
SQSTM1	0.906543	9.0796	3.05106	0.00345737	0.0918727	-2.28112
COX5A	0.680011	5.42213	3.04965	0.00347132	0.0921652	-2.20796
AC092535.3	-1.10212	1.96463	-3.04883	0.00347944	0.0923026	-2.06103
PPFIA4	1.51367	5.10615	3.04801	0.00348761	0.092441	-2.16756
MAATS1	-0.887807	3.44992	-3.04738	0.0034939	0.0925292	-2.15961
RP11-485M7.3	-2.82695	-2.12381	-3.04658	0.00350193	0.0926058	-1.88453
RP11-175P13.3	-0.709043	1.31229	-3.0465	0.00350271	0.0926058	-2.00642
OXGR1	-1.28323	-0.646727	-3.04575	0.00351019	0.0927253	-1.91054
PLCH2	-1.16418	3.98248	-3.04438	0.00352399	0.0930037	-2.20215
RP1-228P16.8	1.21979	-1.94779	3.04411	0.00352667	0.0930037	-1.84527
RP11-797H7.1	-0.627783	2.24353	-3.0435	0.00353282	0.0930875	-2.07703
GSG2	1.12731	0.568479	3.0419	0.00354901	0.0934355	-1.90772
C6orf201	-0.776084	0.836338	-3.0402	0.00356627	0.0938109	-1.99463
RP1-80N2.3	-0.899909	0.996631	-3.03944	0.00357402	0.0939358	-2.00912
EIF4EP1	-0.738756	0.592974	-3.03795	0.0035892	0.0942557	-1.98442
PAK6	-1.00742	1.99927	-3.03692	0.00359978	0.0943558	-2.08997
SPATA6	-0.487592	4.36888	-3.0366	0.00360301	0.0943558	-2.22651
HMGXB3	0.375314	6.24564	3.03584	0.0036108	0.0943558	-2.2757
TOM1	0.60493	6.267	3.0357	0.00361232	0.0943558	-2.27308
SHARPIN	0.523733	4.83814	3.03548	0.0036145	0.0943558	-2.22179
P4HB	0.846285	8.28975	3.03539	0.00361543	0.0943558	-2.31273
PRSS22	-1.74209	-0.182173	-3.03505	0.00361896	0.0943558	-1.97517
HOXB-AS3	-0.803025	2.35941	-3.03495	0.00361998	0.0943558	-2.11245
ADRA2B	-1.06794	1.77049	-3.03494	0.00362014	0.0943558	-2.08194
C12orf49	0.991875	7.82337	3.03395	0.00363034	0.0944791	-2.30679
WDFY2	-0.457663	5.94104	-3.03378	0.00363208	0.0944791	-2.28608
ERVH48-1	-0.660061	2.62684	-3.0336	0.00363393	0.0944791	-2.13091
ZNF350-AS1	-0.993635	-0.175909	-3.03068	0.00366435	0.0951909	-1.96426
AKIRIN1P1	-1.46831	-2.75001	-3.03019	0.00366942	0.0952437	-1.88357
KLF9	-0.515836	6.26239	-3.02962	0.00367541	0.0953002	-2.30489
LMNB2	0.675327	5.25966	3.0294	0.00367769	0.0953002	-2.25364
RP11-90E5.1	-1.14576	-1.45833	-3.02775	0.00369496	0.0956474	-1.91503
NOS1AP	-0.841519	3.14272	-3.02734	0.00369929	0.0956474	-2.18938
CFAP69	-0.538555	3.44906	-3.02725	0.00370025	0.0956474	-2.20062
STK32A	-1.44675	1.83057	-3.02657	0.00370736	0.0957521	-2.12385
TYRP1	-1.88472	0.324533	-3.02439	0.00373043	0.0962684	-2.03877
CSTB	0.8314	5.76709	3.02359	0.0037389	0.0963793	-2.28472
RP3-416H24.1	-1.3993	0.515155	-3.0232	0.00374305	0.0963793	-2.03786
TMEM127	0.430467	6.99316	3.02305	0.00374468	0.0963793	-2.32605
CLDN10	-1.61737	3.36033	-3.02242	0.00375138	0.0963793	-2.23933
KTI12	0.636704	2.37435	3.02219	0.00375388	0.0963793	-2.08821
NEK5	-0.577281	2.32539	-3.02209	0.00375493	0.0963793	-2.13573
CHL1-AS2	-1.48717	-2.08109	-3.02186	0.00375742	0.0963793	-1.91618
ZMIZ1-AS1	1.25794	2.76066	3.02167	0.00375936	0.0963793	-2.08907
ZNF891	-0.451316	5.34657	-3.02097	0.00376692	0.0964941	-2.30202
SCYL1	0.515611	5.73848	3.02002	0.00377702	0.0966738	-2.29915
RP4-587D13.1	-1.26429	-2.54958	-3.01946	0.0037831	0.0967502	-1.90967
RP11-887P2.5	-0.635036	2.80669	-3.01917	0.00378619	0.0967502	-2.18078
SLC47A2	-1.94195	2.1943	-3.0183	0.00379562	0.096912	-2.18682
MDH1B	-0.775374	1.17342	-3.01759	0.00380324	0.0970274	-2.07366
PRKAR1AP	-0.689385	-0.274562	-3.01558	0.00382501	0.0975035	-1.98868
AC024592.9	-1.45664	-2.92622	-3.01528	0.00382819	0.0975053	-1.91698
CKAP2L	1.72411	0.447528	3.0144	0.00383784	0.0976715	-1.95325
HIF3A	-0.997679	3.0536	-3.01394	0.00384279	0.0977181	-2.22471
OR10AB1P	-1.13109	-0.990878	-3.01358	0.00384675	0.0977393	-1.96934
ASPDH	-1.05245	0.969902	-3.01254	0.00385812	0.0979487	-2.08132
HMGCLL1	-1.49446	0.122829	-3.01222	0.00386158	0.0979571	-2.04514
MSANTD3	0.544534	4.55197	3.01163	0.00386813	0.098017	-2.26887
SCARB1	1.26717	7.27123	3.01121	0.00387272	0.098017	-2.35101
ANKRD13A	-0.32571	5.59462	-3.01098	0.00387523	0.098017	-2.3331
DRD5	-1.15062	-1.15862	-3.0106	0.00387943	0.098017	-1.96728
IGFBP5	-1.18131	8.96083	-3.01054	0.00388003	0.098017	-2.39434
MAPK3	0.588504	5.59532	3.0103	0.00388273	0.098017	-2.31756
DGKD	0.498172	5.44916	3.00848	0.00390274	0.0983385	-2.31935
RP11-494K3.2	-1.30221	1.54749	-3.00834	0.0039043	0.0983385	-2.14146
RP11-20I20.1	-1.27901	-1.34233	-3.00829	0.00390489	0.0983385	-1.97036
ST6GALNAC3	-0.941934	2.01152	-3.00714	0.00391761	0.0985796	-2.16763
RP11-734K2.4	-0.577244	3.96853	-3.00578	0.00393275	0.0988809	-2.28806
AMER1	-0.46897	4.36201	-3.00472	0.00394454	0.0990979	-2.30644
ABR	0.793386	8.92321	3.00435	0.0039487	0.0991227	-2.4013
FRMD8	0.530617	5.07063	3.00329	0.00396063	0.0992304	-2.316
CASC18	-1.09583	-1.27424	-3.00299	0.00396402	0.0992304	-1.98095
AGMAT	-1.472	3.9337	-3.00288	0.00396521	0.0992304	-2.312
TMEM30B	-1.03264	3.15121	-3.00245	0.00397005	0.0992304	-2.26223
SHH	-1.31265	1.41634	-3.00232	0.00397154	0.0992304	-2.14862
SPHK1	1.25456	3.54144	3.00203	0.0039747	0.0992304	-2.18976
NUGGC	-0.967759	0.495149	-3.00199	0.00397517	0.0992304	-2.07442
PWAR5	-2.17584	1.71846	-3.00147	0.00398105	0.0992977	-2.20872
ZNF559	-0.543802	4.78085	-3.00108	0.00398551	0.0993299	-2.33681
USB1	0.625054	5.35907	3.00013	0.00399617	0.0995164	-2.33243
UST	0.615269	4.45075	2.99958	0.00400245	0.0995271	-2.28986
HIST1H2AK	1.17875	-0.0718733	2.99941	0.0040043	0.0995271	-1.98048
RP11-6K23.1	-1.3999	-2.34288	-2.99872	0.00401212	0.0995271	-1.96345
PAIP1P1	-0.928549	-0.178292	-2.99862	0.00401333	0.0995271	-2.04187
CTC-457E21.1	-1.43938	-0.244155	-2.99858	0.00401379	0.0995271	-2.05492
HS3ST3B1	-0.805801	2.37846	-2.99819	0.00401821	0.0995271	-2.20858
C15orf59-AS1	-1.36555	-2.52967	-2.99813	0.00401886	0.0995271	-1.9618
MAL2	-1.5205	3.87501	-2.99758	0.0040251	0.099603	-2.32676
N6AMT1	-0.544173	4.10295	-2.99664	0.00403587	0.0997906	-2.31846
PRKAR1B	0.801147	5.06111	2.99593	0.00404398	0.0998474	-2.32504
PARVB	0.607458	4.20127	2.99588	0.00404455	0.0998474	-2.28557
AC091814.2	-1.43085	-2.75907	-2.99376	0.00406883	0.100368	-1.96927
SPEF2	-0.782993	4.43814	-2.99331	0.00407402	0.100417	-2.3475
MLLT4-AS1	-0.748018	1.5659	-2.99284	0.00407947	0.100418	-2.16054
PADI2	-1.27202	3.32992	-2.99275	0.00408048	0.100418	-2.30479
FN3K	0.878923	6.71416	2.99193	0.00408997	0.100572	-2.39258
RP11-6O2.4	1.87551	1.49785	2.99117	0.00409872	0.100669	-2.06137
MYCN	-1.52897	0.0873149	-2.99103	0.00410034	0.100669	-2.09311
SLC25A19	0.516112	2.93779	2.99066	0.00410462	0.100685	-2.21178
RPP25	1.26152	5.23123	2.99041	0.00410756	0.100685	-2.33448
AFAP1L2	-0.915604	4.0995	-2.99014	0.00411065	0.100685	-2.34305
RP11-18M17.1	-1.18986	-1.92016	-2.98972	0.00411555	0.100726	-1.99219
SBNO2	0.972553	6.9683	2.9891	0.0041228	0.100802	-2.40468
FADD	0.694769	3.97461	2.98864	0.00412806	0.100802	-2.28474
STK32B	-0.781038	3.82627	-2.98862	0.0041283	0.100802	-2.32894
ZNF775	0.685807	2.86845	2.98732	0.00414346	0.101093	-2.20513
ARHGAP24	-0.809401	5.88111	-2.98671	0.0041506	0.101189	-2.41077
ITGA2	-0.831385	5.05152	-2.98607	0.00415822	0.101261	-2.3896
STARD13-AS	-0.63829	3.61651	-2.98591	0.00416005	0.101261	-2.32053
HOXC-AS3	-1.49095	0.759883	-2.98562	0.00416345	0.101265	-2.15035
NOL4L	0.403877	6.30744	2.98462	0.00417517	0.101458	-2.40895
GPR146	0.737532	3.6447	2.98439	0.00417786	0.101458	-2.26908
H2AFX	0.850356	4.04153	2.98378	0.00418514	0.101556	-2.28945
STAP1	-1.26775	-0.49477	-2.98244	0.00420093	0.101813	-2.07475
CHCHD3P2	-1.17199	-2.07896	-2.98233	0.00420225	0.101813	-2.00549
PPP4C	0.496039	4.86272	2.98104	0.00421762	0.102107	-2.36475
ZBTB16	-1.15782	4.81299	-2.97931	0.00423815	0.102524	-2.40354
GPRIN2	-1.48018	0.941541	-2.97874	0.00424501	0.102561	-2.17895
ACP5	1.35077	7.86914	2.97864	0.0042462	0.102561	-2.4461
SLITRK2	-1.47766	1.44962	-2.97774	0.00425704	0.102743	-2.21716
AURKA	1.00402	1.68084	2.97746	0.00426041	0.102745	-2.13924
MCM2	0.847238	3.16075	2.97691	0.00426694	0.102824	-2.24973
PRODH2	-1.51461	3.69781	-2.97604	0.00427743	0.102925	-2.37275
PGLS	0.594594	4.86377	2.9758	0.00428029	0.102925	-2.375
CPEB2-AS1	-0.862458	0.126734	-2.97574	0.004281	0.102925	-2.11414
RP11-354K4.2	-1.38353	-2.38405	-2.97513	0.00428844	0.103025	-2.01922
RP11-131K5.2	-0.801525	-0.860856	-2.97429	0.00429854	0.103188	-2.06101
FAM47E	-0.733927	2.79148	-2.97377	0.00430481	0.103259	-2.29667
TPTEP1	-1.29894	3.1608	-2.97255	0.00431969	0.103537	-2.34738
RP11-174O3.1	1.23164	-2.33421	2.97115	0.00433677	0.103827	-2.01409
ARHGEF16	-1.13704	3.02915	-2.97101	0.00433843	0.103827	-2.33574
LINC01561	-1.23544	-1.26783	-2.97062	0.00434315	0.103861	-2.06374
ALDH7A1	-0.455721	5.55212	-2.96969	0.00435458	0.104054	-2.43994
CCIN	1.27186	-2.26469	2.96934	0.0043588	0.104076	-2.01841
RP11-89N17.4	-0.825193	0.591456	-2.96888	0.00436446	0.104117	-2.16011
RP11-25G10.2	-0.897387	-0.0235695	-2.96866	0.00436718	0.104117	-2.12454
RP11-479O17.10	-1.04243	-0.599272	-2.96728	0.0043842	0.104443	-2.09855
C12orf76	-0.411921	3.61013	-2.96614	0.00439831	0.1047	-2.36334
VWA2	-0.94907	2.0577	-2.96534	0.00440815	0.104742	-2.27403
ORAI3	0.559636	4.80456	2.96515	0.00441048	0.104742	-2.39975
KCNE1	-1.27956	0.803224	-2.96462	0.00441714	0.104742	-2.19775
RPL39L	1.05227	0.0439792	2.96442	0.00441962	0.104742	-2.07324
AE000661.37	-1.18274	-1.63432	-2.96439	0.00441997	0.104742	-2.06258
NAALAD2	-0.786418	1.93301	-2.96437	0.00442015	0.104742	-2.2618
SLC38A6	0.647102	4.78393	2.96228	0.00444627	0.105281	-2.40331
PAQR4	1.12286	2.50889	2.96141	0.00445715	0.105285	-2.22603
PCDH15	-1.38335	-0.804448	-2.9611	0.004461	0.105285	-2.11334
CERKL	-1.29279	1.1265	-2.96089	0.00446362	0.105285	-2.23022
CTD-2008P7.10	-1.2421	-1.47009	-2.96084	0.00446422	0.105285	-2.07727
PPP1R37	0.875093	6.84902	2.96066	0.00446651	0.105285	-2.4761
GDF7	-0.728672	4.91005	-2.96051	0.00446842	0.105285	-2.44745
ENPP7P10	-0.713355	0.274617	-2.96025	0.00447159	0.105285	-2.1556
CAMSAP1	0.427296	5.96636	2.96003	0.00447446	0.105285	-2.46156
RP11-326K13.4	1.24533	0.262608	2.95985	0.00447671	0.105285	-2.08758
TUBB8P7	-1.41422	-2.33053	-2.95953	0.00448075	0.105301	-2.05739
RP11-210M15.2	-1.05563	3.76908	-2.95889	0.00448869	0.105409	-2.41004
IQCH	-0.575489	2.2505	-2.95798	0.00450029	0.105431	-2.29269
AP2S1	0.660214	4.67674	2.95797	0.00450041	0.105431	-2.40888
SHISA5	0.578673	6.63948	2.95796	0.00450054	0.105431	-2.48363
AC104651.3	-0.839881	-0.526927	-2.95775	0.00450311	0.105431	-2.11953
WBP2NL	-0.809572	1.57304	-2.95702	0.00451239	0.105522	-2.25409
ASPG	-1.4751	2.58852	-2.95691	0.00451377	0.105522	-2.35112
KCNA4	-1.29395	-1.64529	-2.95653	0.00451863	0.105557	-2.08274
EIF5A2P1	-0.814852	-0.547627	-2.95547	0.00453199	0.105775	-2.12385
PRTG	-0.754459	3.29258	-2.95526	0.00453472	0.105775	-2.38145
RP11-592N21.2	-1.17279	-0.749131	-2.95458	0.00454335	0.105898	-2.12426
PLA2G16	0.803279	6.35052	2.95402	0.00455048	0.105985	-2.48226
LINC01565	-1.23272	-2.53786	-2.95354	0.00455668	0.10605	-2.06476
SYTL2	-0.787188	6.40874	-2.95277	0.00456653	0.106201	-2.50903
LINC00476	-0.513903	3.37856	-2.95181	0.00457883	0.106331	-2.38352
RPL21P32	-0.950688	-0.172696	-2.95137	0.00458445	0.106331	-2.15966
CLDN10-AS1	-1.33483	0.273551	-2.9509	0.00459047	0.106331	-2.20005
NME5	-0.744409	1.70373	-2.95081	0.00459165	0.106331	-2.27683
FMO5	-0.544908	3.54417	-2.95075	0.00459242	0.106331	-2.40341
WIPI1	0.456271	4.92457	2.95074	0.0045925	0.106331	-2.4462
TIMM50	0.492445	5.05609	2.94957	0.00460757	0.106529	-2.45217
CHMP1B2P	-1.24446	1.17697	-2.94955	0.00460787	0.106529	-2.26322
ALPI	-1.72729	-2.45753	-2.94908	0.00461394	0.10657	-2.0848
AC069363.1	-1.87652	-1.40062	-2.94889	0.00461645	0.10657	-2.1262
SVIP	-0.588876	3.88785	-2.94849	0.00462155	0.106609	-2.43097
RITA1	0.543752	3.83892	2.94817	0.00462579	0.106628	-2.38448
RP11-539G18.3	-0.804369	0.187015	-2.94692	0.00464191	0.106793	-2.18618
RP11-465B22.8	-1.36709	1.38781	-2.94685	0.00464293	0.106793	-2.28525
RP1-187B23.1	-0.981073	2.19304	-2.94683	0.00464319	0.106793	-2.32943
E2F1	1.03755	1.60709	2.94601	0.00465379	0.106908	-2.209
ANAPC11	0.563959	4.19348	2.94592	0.004655	0.106908	-2.41264
RP11-568K15.2	-1.245	-3.14459	-2.9431	0.00469189	0.10761	-2.08275
SLC26A9	-1.57451	1.26904	-2.94306	0.00469243	0.10761	-2.29654
LHFPL3	-1.40739	0.00529563	-2.94195	0.00470705	0.107866	-2.20869
EHD3	-0.569435	4.76867	-2.94008	0.00473163	0.108285	-2.49128
MTX1	0.474277	4.41538	2.93959	0.0047381	0.108285	-2.44469
MAF1	0.520848	5.69617	2.93953	0.00473897	0.108285	-2.50297
RP5-916O11.3	0.815993	2.75077	2.93914	0.0047441	0.108285	-2.31386
ZFP14	-0.401135	4.47105	-2.93908	0.00474496	0.108285	-2.47759
RP11-635O16.1	-2.11608	-2.27273	-2.93884	0.00474814	0.108285	-2.12089
PP7080	-0.627201	4.59429	-2.93873	0.00474955	0.108285	-2.48828
SRXN1	0.734671	4.61952	2.9378	0.004762	0.108484	-2.45432
AP000280.66	-1.6211	-1.95464	-2.93755	0.00476523	0.108484	-2.12367
LINC01266	-1.27663	1.30349	-2.93609	0.00478478	0.10885	-2.30424
UBC	0.490938	8.67043	2.93559	0.00479141	0.108922	-2.57675
KB-1572G7.3	-1.11021	-0.873325	-2.93525	0.00479594	0.108946	-2.16293
ADAM20	-0.699617	1.7341	-2.93473	0.004803	0.109027	-2.31476
ENPP7P8	-0.892311	-0.742829	-2.93376	0.00481605	0.109189	-2.16694
HAGHL	1.13137	5.32911	2.93368	0.00481711	0.109189	-2.48493
LINC01482	-1.07908	-0.596343	-2.9332	0.00482358	0.109256	-2.18215
GAB1	-0.41167	5.60593	-2.93242	0.004834	0.109378	-2.53607
GSR	0.549401	6.25302	2.93228	0.00483593	0.109378	-2.53836
PIH1D2	-0.802768	0.931377	-2.93144	0.00484725	0.109497	-2.27471
HOXB3	-0.723389	5.6971	-2.93137	0.00484818	0.109497	-2.54609
C8G	1.31192	-0.880647	2.93086	0.00485522	0.109569	-2.12104
EME1	0.862414	0.104241	2.93062	0.00485838	0.109569	-2.16491
RPL9P2	-0.749724	-1.0533	-2.92923	0.00487723	0.109915	-2.15848
E2F7	1.43728	0.0797485	2.92867	0.00488496	0.11001	-2.15058
MTND5P16	-1.13953	-0.962912	-2.92783	0.00489636	0.110188	-2.17764
EPN3	-0.910903	1.98649	-2.9256	0.00492699	0.110726	-2.36509
TMEM51-AS1	-0.798235	3.79664	-2.92536	0.00493024	0.110726	-2.48789
2021-03-10	-1.35373	-1.87231	-2.92531	0.0049309	0.110726	-2.14924
HSPD1P11	-0.888001	2.22529	-2.92478	0.00493817	0.11081	-2.38651
CDIP1	0.500746	6.16128	2.92322	0.0049597	0.111213	-2.55966
SORBS2	-0.665882	6.29494	-2.92284	0.00496501	0.111253	-2.58081
CNPPD1	0.628795	7.10698	2.92147	0.00498393	0.111492	-2.58573
GRAMD4	0.798023	5.80082	2.92146	0.00498417	0.111492	-2.54572
SLC35E1	0.456228	6.19576	2.9213	0.00498639	0.111492	-2.5657
CTD-2184D3.1	1.72239	-1.41157	2.92075	0.004994	0.111582	-2.13453
NR1I3	-0.822453	0.565294	-2.9201	0.00500306	0.111705	-2.27632
CTC-277H1.7	-0.801436	0.294861	-2.91861	0.00502388	0.11209	-2.26219
FAM111A	-0.383419	6.2317	-2.91747	0.00503976	0.112364	-2.58929
LINC01091	-0.881361	0.769759	-2.91602	0.00506025	0.112701	-2.30431
C20orf27	0.656415	4.02436	2.91589	0.00506206	0.112701	-2.47124
RALYL	-1.86366	1.55795	-2.91549	0.0050677	0.112747	-2.39562
NPR3	-1.37377	5.55996	-2.91387	0.0050906	0.113175	-2.59455
FAM184A	-0.858919	2.84338	-2.91296	0.00510351	0.113382	-2.45785
CTSD	0.833974	10.5883	2.91161	0.00512265	0.113633	-2.64993
GTF3C1	0.438588	6.93512	2.91154	0.00512361	0.113633	-2.60947
PQLC2	0.750879	3.97	2.91125	0.0051278	0.113633	-2.47388
OAZ1	0.536132	7.69714	2.91114	0.00512933	0.113633	-2.62431
RP11-506O24.2	-0.969592	0.741629	-2.90987	0.00514753	0.113898	-2.32034
RP11-232L2.1	-1.36649	-2.48279	-2.90971	0.00514976	0.113898	-2.16968
CLCN7	0.710704	7.90105	2.90954	0.00515221	0.113898	-2.62982
GRIA3	-1.20827	0.142464	-2.90832	0.00516971	0.114063	-2.29171
TMEM147	0.483759	4.76537	2.90827	0.0051705	0.114063	-2.54484
RAB7A	0.711062	7.74118	2.90826	0.0051706	0.114063	-2.63087
CTC-360J11.4	-0.973326	-0.701317	-2.90787	0.00517619	0.114067	-2.23377
NAPA	0.851977	7.09507	2.90774	0.00517808	0.114067	-2.61739
RP11-86K22.2	-1.36864	-2.45052	-2.90684	0.00519109	0.114273	-2.17717
VWC2L	-1.10444	-0.318268	-2.90597	0.00520359	0.114399	-2.26484
SPTBN2	-1.27044	5.55003	-2.90568	0.00520774	0.114399	-2.61346
TRAPPC6A	0.716076	3.23111	2.90551	0.00521019	0.114399	-2.43859
SCML2P2	-0.804244	-0.307785	-2.90543	0.00521141	0.114399	-2.25814
ATOH8	-0.906271	3.87253	-2.90516	0.00521528	0.114404	-2.54604
RP11-190A12.7	-0.535962	3.5831	-2.90468	0.0052222	0.114471	-2.51878
RP11-95H11.1	-0.871568	-0.0595277	-2.90445	0.00522566	0.114471	-2.27598
ZNF571	-0.51815	3.14748	-2.90237	0.00525592	0.11498	-2.49656
RP11-320P11.1	-0.725532	1.12999	-2.90234	0.00525626	0.11498	-2.35473
AC006994.3	-1.15687	-0.041567	-2.9016	0.00526718	0.115139	-2.29513
ALDH3A2	-0.619088	5.73633	-2.90101	0.00527574	0.115245	-2.62222
RP11-677M14.3	-0.614407	1.16216	-2.90074	0.00527972	0.115252	-2.35558
RP11-267M23.4	-0.842533	-0.907729	-2.89778	0.00532321	0.116056	-2.24428
SLC25A48	-1.57773	1.56589	-2.89773	0.00532397	0.116056	-2.42872
DPP9	0.551301	6.03549	2.8969	0.00533618	0.116241	-2.62118
RP5-916O11.1	0.893709	0.0497713	2.89543	0.00535799	0.116611	-2.24456
AP3D1	0.501297	7.60664	2.89526	0.0053606	0.116611	-2.66301
ATP6V0C	0.448285	7.19983	2.89461	0.00537015	0.116737	-2.65757
LBX2	0.878257	0.998788	2.89383	0.00538188	0.116853	-2.3015
GLTP	-0.353364	4.40283	-2.8937	0.00538375	0.116853	-2.58805
ZFYVE26	0.486936	7.12481	2.89351	0.00538666	0.116853	-2.658
RP11-254A24.2	-1.27059	-1.66946	-2.89218	0.00540646	0.117201	-2.23356
ZNF350	-0.577789	3.49896	-2.89163	0.00541479	0.1173	-2.55015
NPY5R	-1.11992	1.2721	-2.89123	0.00542067	0.117347	-2.4071
GS1-259H13.2	-1.1406	-1.35717	-2.89019	0.00543633	0.117604	-2.24729
PAXBP1-AS1	-0.417911	2.7961	-2.88951	0.00544655	0.117744	-2.49479
C8orf4	-1.13677	3.87093	-2.88883	0.00545681	0.117877	-2.59363
USP53	-0.747948	6.2203	-2.88861	0.00546022	0.117877	-2.66677
KXD1	0.3746	5.27612	2.88694	0.00548543	0.118285	-2.62268
TTLL10-AS1	-1.53633	-1.73871	-2.88686	0.00548669	0.118285	-2.24901
RAI1	0.66043	7.35225	2.88653	0.00549174	0.118312	-2.67802
RP11-231E6.1	-1.66251	1.89036	-2.8857	0.00550442	0.118504	-2.48651
DCLK3	1.55715	-2.06956	2.88516	0.0055125	0.118596	-2.21109
CCNG2	-0.537762	5.46995	-2.88435	0.00552489	0.118724	-2.65374
SLC9A3R1	0.808641	7.19636	2.88428	0.005526	0.118724	-2.67859
KB-1471A8.1	-1.13312	0.606093	-2.88342	0.00553915	0.118925	-2.37823
WIPI2	0.463903	6.58788	2.88245	0.00555406	0.118979	-2.67389
RP1-102E24.8	-0.764601	-0.280836	-2.88241	0.00555458	0.118979	-2.31312
GRAMD3	-0.401453	4.78391	-2.88215	0.00555864	0.118979	-2.6342
AC006116.17	-0.682931	0.378972	-2.8821	0.00555939	0.118979	-2.35193
GYS1	0.518801	5.63664	2.88202	0.00556069	0.118979	-2.64616
OR52B5P	-0.712885	0.868723	-2.88169	0.00556572	0.119005	-2.38713
CUTA	0.760957	5.71144	2.88116	0.0055739	0.119099	-2.64547
GIPC1	0.63778	6.10357	2.88066	0.00558159	0.119128	-2.66207
RP11-503C24.4	-1.31401	-2.94252	-2.88058	0.00558286	0.119128	-2.22887
HOXD4	-0.678854	2.87859	-2.87952	0.00559922	0.119233	-2.53823
AC083843.4	-0.863411	1.81292	-2.87939	0.00560128	0.119233	-2.4668
FMO4	-0.793507	4.05181	-2.87927	0.00560302	0.119233	-2.61825
DICER1-AS1	-0.498773	3.04046	-2.87905	0.00560652	0.119233	-2.54161
RP11-61L19.2	-1.36568	-2.68802	-2.87884	0.00560969	0.119233	-2.23653
ECI1	0.526759	5.15364	2.87878	0.00561063	0.119233	-2.63463
PRR36	-0.95738	2.34731	-2.87851	0.00561488	0.119242	-2.51036
RP11-528M18.2	-1.47718	0.430738	-2.87771	0.00562719	0.119352	-2.3939
RP11-517P14.7	-0.997842	-1.68975	-2.87768	0.00562771	0.119352	-2.25951
NAP1L2	-1.01291	1.9303	-2.87744	0.00563151	0.119352	-2.48568
SPATA17	-0.872523	0.277398	-2.87541	0.0056631	0.11962	-2.36995
TSTA3	0.476583	4.11282	2.87531	0.00566473	0.11962	-2.58715
ZNF833P	-0.848606	0.4145	-2.87483	0.00567222	0.11962	-2.37928
COBLL1	-0.769232	8.06691	-2.87475	0.00567339	0.11962	-2.73101
CYC1	0.622294	5.81788	2.8747	0.00567415	0.11962	-2.66802
OSBPL3	-0.651585	5.20964	-2.87446	0.00567799	0.11962	-2.67395
HOXC5	-0.859349	2.55873	-2.8743	0.00568051	0.11962	-2.53286
CTD-2104P17.2	-1.00739	-0.998535	-2.87415	0.00568288	0.11962	-2.29977
RP11-121M22.1	-0.919624	-0.032823	-2.87398	0.0056855	0.11962	-2.35178
RP5-943J3.2	-0.722669	-1.01997	-2.87386	0.00568742	0.11962	-2.29063
C1orf145	-0.647815	1.2568	-2.87358	0.00569171	0.11962	-2.42992
SV2B	1.45762	7.10444	2.87351	0.00569292	0.11962	-2.6942
RP11-458D21.1	-0.667101	0.696929	-2.87345	0.00569381	0.11962	-2.39303
CARF	-0.404142	4.51575	-2.87211	0.00571496	0.119983	-2.64816
CDC45	1.30381	-0.669414	2.87176	0.00572044	0.120018	-2.26236
BCKDK	0.486736	5.32658	2.87146	0.00572513	0.120036	-2.66171
RBP5	-0.871199	4.82103	-2.86969	0.00575314	0.120505	-2.67521
ARSDP1	-1.42747	-3.24566	-2.86954	0.00575554	0.120505	-2.25113
RPS23P5	-1.36474	-3.07324	-2.86921	0.00576082	0.120505	-2.25354
DACH2	-1.78669	-0.753464	-2.86908	0.00576289	0.120505	-2.3483
LPCAT1	0.739611	6.15059	2.86774	0.00578423	0.12087	-2.69384
SRRM4	-1.13744	-1.14318	-2.8668	0.00579912	0.121101	-2.31314
GS1-204I12.4	-1.25439	-1.80096	-2.86641	0.00580548	0.121121	-2.28731
SPTBN4	1.36721	3.88991	2.86605	0.00581126	0.121121	-2.54948
DNM3	-0.587912	3.82607	-2.86602	0.00581172	0.121121	-2.63269
RP11-686D22.8	-0.789799	1.09913	-2.86572	0.00581644	0.121139	-2.44603
PSMG1	0.746768	3.74949	2.86536	0.00582218	0.121178	-2.57377
KIF26B	0.964974	6.53435	2.86483	0.0058307	0.121248	-2.70835
MST1P2	-1.16733	2.70856	-2.86467	0.00583327	0.121248	-2.57824
REEP4	0.726066	3.54532	2.86332	0.005855	0.121599	-2.56446
CCSER1	-0.897088	4.57717	-2.86314	0.00585797	0.121599	-2.68335
MYCNOS	-1.25721	-3.42087	-2.86228	0.00587184	0.121729	-2.26522
MME	-1.53499	5.72535	-2.86227	0.005872	0.121729	-2.72907
PCDHB17P	-1.0273	-0.549686	-2.86196	0.00587701	0.121753	-2.35401
CEL	-1.07261	1.42208	-2.86115	0.00589006	0.121942	-2.48591
RP11-494M8.4	-1.28067	-2.49446	-2.8591	0.00592347	0.122498	-2.28487
ST6GALNAC4	0.640587	3.72447	2.85902	0.00592472	0.122498	-2.591
AS3MT	0.995341	5.0899	2.85877	0.00592884	0.122502	-2.66454
RP1-21O18.3	-0.778404	1.08394	-2.85851	0.00593308	0.122509	-2.4605
SPAG7	0.430144	4.2787	2.85777	0.00594524	0.122679	-2.64355
AC012370.3	-0.804273	-0.839778	-2.85734	0.00595226	0.122743	-2.34127
SIRPA	0.566956	7.65417	2.85689	0.00595957	0.122813	-2.75928
RP11-1055B8.4	-0.941616	2.93277	-2.85658	0.00596466	0.122837	-2.60625
SAYSD1	0.507656	3.54608	2.85622	0.00597061	0.122848	-2.59455
DEPDC7	-0.907138	1.04924	-2.85607	0.00597304	0.122848	-2.47134
F8A3	1.09546	3.23755	2.85427	0.00600273	0.123377	-2.54143
RPL13AP17	-1.02426	-1.31135	-2.85351	0.00601526	0.123554	-2.33275
CACNA2D3-AS1	-1.26031	-1.78636	-2.85291	0.00602518	0.123676	-2.32039
SRGAP3-AS3	-0.954141	-0.786257	-2.85196	0.00604081	0.123916	-2.36138
RP11-61L19.1	-0.739602	1.95902	-2.85067	0.00606234	0.124276	-2.54368
CFAP44	-0.546782	4.12796	-2.85025	0.00606933	0.124321	-2.68799
RP4-583P15.10	-1.37829	-2.08769	-2.84987	0.00607573	0.124321	-2.31903
NHS	-0.638822	5.72124	-2.84941	0.00608339	0.124321	-2.75005
FLJ21408	-0.793433	0.414269	-2.84911	0.00608835	0.124321	-2.43966
BPI	-1.30857	-2.25363	-2.84908	0.00608892	0.124321	-2.31457
DYSF	0.811383	6.06089	2.84884	0.00609289	0.124321	-2.73659
FMO2	-1.17069	3.79653	-2.84872	0.00609481	0.124321	-2.69031
OSTM1	0.685668	5.53512	2.84863	0.00609629	0.124321	-2.72107
CLCN5	-0.896907	7.02191	-2.84838	0.0061005	0.124326	-2.78392
RN7SL359P	-1.11797	-0.987114	-2.84759	0.00611387	0.124493	-2.36469
USP44	-0.995553	0.4883	-2.84722	0.00611996	0.124493	-2.45336
ABCA10	-0.849942	3.06654	-2.84718	0.00612067	0.124493	-2.63761
CTD-2313J17.5	-0.695382	0.249453	-2.84659	0.00613065	0.124565	-2.43006
BSPRY	-1.3296	1.60176	-2.8463	0.00613552	0.124565	-2.55005
AC006427.2	-1.12002	-1.30912	-2.84626	0.00613612	0.124565	-2.35229
AC006042.8	-0.66154	1.05791	-2.84597	0.00614099	0.124583	-2.48542
ACADS	0.723232	4.7734	2.84479	0.00616096	0.124907	-2.69528
CASC1	-0.965294	0.70892	-2.84454	0.00616522	0.124912	-2.47585
RP11-478J18.2	-1.09826	-0.898239	-2.84386	0.00617667	0.125031	-2.37796
SYNE2	-0.632029	9.36886	-2.84372	0.00617907	0.125031	-2.81803
ARMC6	0.567938	4.32748	2.84263	0.00619753	0.125124	-2.67924
RP4-784A16.2	1.28462	-2.06936	2.84217	0.00620532	0.125124	-2.30888
BDKRB2	-0.904526	3.86408	-2.84198	0.00620869	0.125124	-2.70259
BACE2	0.875359	7.96043	2.84186	0.00621064	0.125124	-2.79804
ZNF709	-0.704558	3.11955	-2.84156	0.00621581	0.125124	-2.65176
RFX3	-0.489106	4.60197	-2.84155	0.00621589	0.125124	-2.73006
RGS7BP	-1.18189	2.14545	-2.84151	0.00621663	0.125124	-2.59767
RDH8	-2.58274	0.627759	-2.84145	0.00621765	0.125124	-2.53283
CTD-2024F21.1	-0.968272	-0.247617	-2.84133	0.00621964	0.125124	-2.41945
TMEM184B	0.517352	6.57483	2.84098	0.00622562	0.125164	-2.77616
FAM204CP	-0.83274	-0.390274	-2.83801	0.00627657	0.126108	-2.41614
CENPH	0.802914	0.299618	2.83734	0.00628807	0.126258	-2.39816
RP11-1074O12.1	-0.829297	0.976646	-2.83673	0.00629861	0.126388	-2.50768
RP11-981G7.6	-0.781293	2.28072	-2.83609	0.00630963	0.126466	-2.60466
BAIAP3	-0.850797	2.87112	-2.83604	0.00631056	0.126466	-2.65105
RRAGD	0.893817	8.10896	2.83576	0.0063153	0.12648	-2.81558
ARHGDIA	0.605048	7.55707	2.835	0.00632848	0.126663	-2.81113
CDC6	0.953461	1.12184	2.83381	0.00634913	0.126995	-2.45323
MAN1B1-AS1	0.786868	1.37242	2.83342	0.00635596	0.12705	-2.47465
RP11-295I5.3	-0.727274	-0.572935	-2.83278	0.00636706	0.127116	-2.41212
RP11-346C20.3	-0.796299	0.847544	-2.83254	0.0063713	0.127116	-2.50753
RP13-15M17.1	-0.931163	-0.317044	-2.83253	0.00637146	0.127116	-2.43345
BOLA3	0.687378	3.0781	2.83179	0.00638439	0.127244	-2.60927
SNRK-AS1	-0.691378	2.18036	-2.83169	0.00638597	0.127244	-2.60429
LRRTM3	-1.14024	-0.252607	-2.8311	0.00639628	0.127294	-2.44838
LINC01473	-0.583775	1.38713	-2.83033	0.00640993	0.127294	-2.54361
FASN	0.717259	6.77131	2.83031	0.00641014	0.127294	-2.80436
BNIP3P32	-1.33048	-2.7114	-2.83007	0.00641448	0.127294	-2.34692
NDFIP1P1	-1.35774	-2.81045	-2.83006	0.00641453	0.127294	-2.3459
TAS2R10	-1.07821	-1.00462	-2.83003	0.00641514	0.127294	-2.40493
ZNF33B	-0.784608	5.58856	-2.82979	0.00641935	0.127294	-2.79822
SIM2	-1.22157	5.0657	-2.82969	0.00642103	0.127294	-2.78759
DNAJC19	-0.557401	3.78164	-2.82913	0.00643083	0.127408	-2.72098
WNT9B	-1.47277	1.62318	-2.82879	0.00643695	0.127448	-2.59672
ENDOG	0.82105	3.02498	2.82829	0.0064457	0.127541	-2.60312
RP11-366L20.2	-1.16715	1.30904	-2.82754	0.00645889	0.127721	-2.56685
KCNJ15	-1.47545	6.34814	-2.8268	0.00647207	0.127901	-2.82982
AGAP3	0.541955	6.01618	2.8261	0.00648437	0.128063	-2.79622
RP11-212D19.5	-0.757577	0.0701263	-2.82571	0.00649125	0.128094	-2.46823
RP11-121C2.2	-0.596272	2.60303	-2.82555	0.00649413	0.128094	-2.64661
THSD7B	-1.14404	2.48583	-2.82525	0.00649942	0.128118	-2.65918
EMC6	0.654512	2.91555	2.82478	0.00650783	0.128155	-2.61475
FAM163A	1.25847	-1.57171	2.82465	0.00651008	0.128155	-2.35412
CARS2	0.38897	5.90452	2.82446	0.00651357	0.128155	-2.80009
MRPS16	0.374428	5.68783	2.82404	0.00652101	0.128156	-2.79446
EFCAB6	-0.642275	2.99189	-2.82372	0.00652667	0.128156	-2.68124
KIAA0930	0.707475	6.4102	2.82368	0.00652733	0.128156	-2.81145
RP11-529K1.4	-1.19245	-3.93203	-2.82353	0.00653003	0.128156	-2.34783
MAPK10	-0.609431	6.36142	-2.82281	0.00654299	0.12833	-2.83157
NTN4	-0.947698	5.82441	-2.82196	0.00655816	0.128547	-2.82438
RP11-111F5.5	-0.732513	0.995419	-2.82087	0.00657769	0.128809	-2.545
NUP62CL	-0.946596	0.657636	-2.82071	0.00658055	0.128809	-2.53027
SCD	1.12866	7.2246	2.82053	0.00658385	0.128809	-2.83333
ANKRD22	-0.988675	0.141801	-2.81955	0.0066014	0.12904	-2.49792
PKM	0.652877	9.15058	2.8192	0.00660778	0.12904	-2.87198
DDX50P1	-0.439001	2.18943	-2.81918	0.00660801	0.12904	-2.62413
TET1	-0.581044	4.05023	-2.8186	0.00661858	0.129165	-2.76014
NR1D1	0.900666	5.24928	2.81793	0.00663072	0.129322	-2.77908
L1CAM	-1.47793	4.02252	-2.81636	0.00665914	0.129793	-2.78611
ARHGAP32	-0.495154	6.01598	-2.81614	0.00666316	0.129793	-2.83821
RAP2B	0.520239	6.38963	2.81559	0.00667318	0.129907	-2.8333
MGAT4A	-0.483642	6.20661	-2.815	0.00668383	0.130034	-2.84549
SFXN2	-0.64574	4.92336	-2.81362	0.00670901	0.130405	-2.81304
RP11-477H21.2	-1.01145	1.49762	-2.8135	0.00671126	0.130405	-2.6106
THEM6	0.706664	4.82541	2.81255	0.00672859	0.130661	-2.77576
RP11-303E16.3	1.03912	-1.63803	2.81149	0.00674804	0.130957	-2.38414
RP11-752D24.2	-0.618938	1.6814	-2.81095	0.00675798	0.131069	-2.61303
LRRC37A6P	-0.797924	2.02832	-2.81012	0.00677322	0.131283	-2.64827
RP11-616M17.1	-0.706561	-0.768971	-2.8093	0.00678841	0.131423	-2.45479
PABPC1P7	-0.715879	-0.600175	-2.80928	0.00678885	0.131423	-2.46414
SMIM2-AS1	-1.21977	1.54772	-2.80881	0.00679756	0.131511	-2.63055
FAM91A3P	-0.636515	0.55726	-2.80834	0.0068062	0.131596	-2.53903
RP11-372K14.2	-0.787456	0.339247	-2.80793	0.00681377	0.131661	-2.53146
RP11-484D2.3	-0.597713	0.456238	-2.80767	0.00681861	0.131674	-2.533
CDC25C	1.44689	-1.84716	2.80694	0.00683214	0.131853	-2.38911
BIRC7	2.03422	5.60713	2.8062	0.00684602	0.13204	-2.78104
SAE1	0.601818	4.96832	2.80579	0.00685361	0.132105	-2.80616
IGSF9	-1.38264	-0.159888	-2.80517	0.00686522	0.132247	-2.52353
EIF3B	0.60429	6.61053	2.80476	0.0068729	0.132314	-2.86378
RP11-16N11.2	-0.653173	0.421044	-2.80435	0.00688045	0.132358	-2.53865
ADIRF	-1.01121	3.27298	-2.80404	0.00688627	0.132358	-2.76458
VSX1	1.43965	-2.02551	2.80377	0.00689137	0.132358	-2.39417
FAM102A	0.911614	7.66416	2.80373	0.00689213	0.132358	-2.88605
RPUSD2	0.549483	2.46356	2.80198	0.0069249	0.132906	-2.6423
YDJC	0.750914	3.63103	2.80106	0.00694229	0.133158	-2.72092
MAGI2-AS1	-0.825238	-0.905689	-2.80043	0.00695423	0.133306	-2.47037
RP11-57B24.1	-1.04935	-1.02711	-2.79987	0.00696484	0.133427	-2.47237
NPC1	0.64914	6.93407	2.79941	0.00697352	0.133476	-2.88548
TSPAN10	1.81986	6.58323	2.79928	0.0069759	0.133476	-2.85246
FBXL18	0.522371	5.3977	2.7983	0.00699461	0.133682	-2.84289
LGI2	-0.983374	2.30398	-2.79827	0.00699521	0.133682	-2.70561
MRPL23-AS1	-0.900419	0.284026	-2.79786	0.00700303	0.13375	-2.55284
CTSLP1	-1.29665	-2.28322	-2.79534	0.00705108	0.134585	-2.43535
ANKAR	-0.415099	3.29038	-2.79439	0.00706917	0.134848	-2.76719
CISH	-0.667538	5.07496	-2.79405	0.0070758	0.134893	-2.86749
FAM227B	-0.588572	2.21141	-2.79328	0.00709056	0.135072	-2.69503
AC002539.1	-1.12723	-1.20921	-2.79311	0.00709385	0.135072	-2.48066
COPE	0.53658	5.62677	2.79195	0.00711615	0.135343	-2.8678
RP11-134D3.1	-1.21188	-2.05385	-2.79192	0.00711673	0.135343	-2.44813
ADH1B	-1.47588	5.03953	-2.79077	0.00713905	0.135649	-2.88739
P2RX6	-1.07005	-0.242472	-2.79034	0.0071473	0.135649	-2.54264
RAB26	0.754297	1.42512	2.79033	0.00714759	0.135649	-2.58295
RP11-697K23.3	-1.10262	-1.92096	-2.79019	0.00715016	0.135649	-2.45473
CHDH	-0.982116	5.56086	-2.78964	0.00716085	0.135726	-2.89702
PGP	0.606194	4.5091	2.78942	0.0071652	0.135726	-2.81713
RELL1	0.562072	5.91413	2.78932	0.00716718	0.135726	-2.88292
CTD-2184D3.3	1.38255	-2.92127	2.78876	0.00717811	0.135797	-2.42096
ZNF667	-0.801107	3.07134	-2.78866	0.00717988	0.135797	-2.77838
RP3-331H24.6	-0.88682	6.66567	-2.78846	0.00718394	0.135797	-2.92466
FIBP	0.489015	4.48315	2.78807	0.00719144	0.135856	-2.82586
CTNNA3	-1.03363	-0.357624	-2.78774	0.00719787	0.135866	-2.54303
PSMG3	0.524139	3.28279	2.7876	0.00720066	0.135866	-2.73906
MACROD2-AS1	-0.806829	-0.223776	-2.78696	0.00721321	0.136021	-2.54387
ZNF83	-0.458241	6.66278	-2.78658	0.00722063	0.136079	-2.92484
PROSER2-AS1	-0.897646	0.5832	-2.78552	0.00724138	0.136388	-2.60217
TMEM11	0.558021	3.99658	2.78421	0.00726714	0.136791	-2.79994
FAM151A	-1.46154	3.2628	-2.78323	0.00728638	0.136962	-2.82786
HIST1H2AI	1.43504	1.16468	2.78294	0.00729208	0.136962	-2.55354
BRAF	-0.364254	6.81317	-2.78286	0.00729359	0.136962	-2.93551
LINC00472	-0.771646	8.99107	-2.78286	0.00729374	0.136962	-2.9659
CTB-47B11.3	-0.706713	2.4007	-2.78182	0.00731418	0.137219	-2.73938
ADH1A	-1.2082	-1.79355	-2.78172	0.0073162	0.137219	-2.48158
TMC4	-1.02889	3.14785	-2.78077	0.00733498	0.13744	-2.81186
ALG1	0.500719	4.18872	2.78063	0.0073379	0.13744	-2.82353
MRPS34	0.651096	4.51845	2.78046	0.00734115	0.13744	-2.83731
PLEKHO2	0.559566	6.34068	2.77909	0.00736843	0.137816	-2.92094
ZNF777	0.48988	4.12372	2.77901	0.00737001	0.137816	-2.82268
RP11-333E1.2	-0.950016	-0.987182	-2.77799	0.00739036	0.138056	-2.52158
RALY	0.34967	6.14347	2.77777	0.00739476	0.138056	-2.92171
WHAMM	0.533988	5.01891	2.77765	0.00739719	0.138056	-2.87501
PALM3	-1.41275	2.73518	-2.77733	0.00740372	0.138056	-2.80218
RP11-39M21.2	-0.73364	1.1208	-2.77727	0.0074049	0.138056	-2.65757
LINC01127	-1.02949	-1.38577	-2.77654	0.00741938	0.138122	-2.50641
RP11-480I12.7	-1.00395	-0.447067	-2.7764	0.00742228	0.138122	-2.56219
LINC00087	-0.844774	1.60226	-2.77612	0.00742799	0.138122	-2.69752
RP11-1020A11.1	-0.802576	-0.379647	-2.77607	0.00742897	0.138122	-2.55833
KATNBL1P2	-1.03512	-0.773076	-2.77599	0.00743053	0.138122	-2.5427
RPL17P50	-0.745783	-0.586559	-2.77557	0.00743891	0.138196	-2.54494
CILP2	2.29135	0.670199	2.77477	0.00745498	0.138326	-2.50849
GPR182	-0.655843	1.2058	-2.77452	0.00746012	0.138326	-2.6661
OLFM4	-1.44695	-1.64479	-2.77436	0.00746334	0.138326	-2.51156
RP11-253M7.1	-0.842468	1.97168	-2.77435	0.0074636	0.138326	-2.72995
ARL17B	-0.458341	3.88369	-2.77253	0.00750037	0.138814	-2.86005
RP4-798P15.3	-0.712883	4.24833	-2.77239	0.00750315	0.138814	-2.88846
RP11-348N5.9	-0.826724	0.606335	-2.77234	0.00750413	0.138814	-2.63635
RP11-63A11.1	-1.42752	-2.67433	-2.77216	0.0075077	0.138814	-2.47915
RPL5P30	-0.638877	0.994179	-2.77195	0.00751211	0.138814	-2.65465
ILDR1	-1.10915	2.45506	-2.77095	0.00753238	0.139041	-2.7867
KANTR	-0.428473	4.66621	-2.77091	0.00753327	0.139041	-2.90323
IRGM	-1.29488	-2.05096	-2.7691	0.00757009	0.139639	-2.50135
FAM134A	0.461602	6.95885	2.76881	0.00757602	0.139666	-2.9626
C10orf71	-1.3162	-2.56735	-2.76825	0.00758743	0.139733	-2.48847
RP11-475O23.3	-1.1942	-1.65811	-2.76819	0.00758872	0.139733	-2.51795
RFX3-AS1	-0.715453	0.994505	-2.76798	0.00759304	0.139733	-2.6684
TBRG4	0.444275	5.02029	2.76705	0.00761208	0.14	-2.90584
OR1C1	-1.17195	-2.55642	-2.76633	0.00762697	0.140135	-2.49124
BRAFP1	-0.936823	0.29219	-2.76619	0.00762978	0.140135	-2.62931
MYH1	-1.44275	-2.43327	-2.76584	0.00763695	0.140135	-2.50005
NPHS1	-1.75352	2.30582	-2.76583	0.00763729	0.140135	-2.81152
HIPK1-AS1	-0.725427	-0.527694	-2.76535	0.00764709	0.140175	-2.57036
FOXK1	0.553336	7.91973	2.76513	0.0076516	0.140175	-2.98875
AP000711.1	-1.09922	0.231509	-2.76507	0.00765291	0.140175	-2.63648
RP11-408H1.3	-0.886463	0.484058	-2.76378	0.00767957	0.140506	-2.64916
DCSTAMP	-1.30841	-1.22303	-2.76372	0.00768069	0.140506	-2.5519
NSUN7	-0.690512	3.21439	-2.76354	0.00768446	0.140506	-2.84588
AC002306.1	-0.921301	-1.23763	-2.76322	0.00769114	0.140546	-2.54069
TMPRSS4-AS1	-1.22848	-0.898897	-2.76263	0.00770334	0.140687	-2.57098
FXYD3	-1.38441	-0.950235	-2.76163	0.00772419	0.140986	-2.57584
RP11-319G9.3	-0.643573	2.56775	-2.7603	0.0077519	0.141409	-2.80415
RP11-326I19.2	-1.03477	-1.68193	-2.75926	0.0077737	0.141724	-2.5321
C2orf81	-1.03966	-0.910243	-2.75886	0.00778212	0.141795	-2.57247
FOXI2	-1.50731	0.256907	-2.75823	0.00779519	0.14195	-2.66549
CTD-2008L17.2	-1.43154	-1.96787	-2.7569	0.00782323	0.142378	-2.53642
AP000695.4	1.59232	0.46451	2.75629	0.0078361	0.142451	-2.56293
PTGES2	0.530363	5.17208	2.75612	0.00783975	0.142451	-2.93604
COL26A1	-1.43314	-0.154579	-2.75595	0.00784333	0.142451	-2.64048
WFDC2	-1.4942	3.22205	-2.75549	0.00785302	0.142451	-2.89154
AC007036.5	-1.29327	-1.08451	-2.75545	0.00785373	0.142451	-2.58133
CLSPN	1.11152	1.58107	2.75536	0.00785573	0.142451	-2.66087
BCAS2P2	-0.805108	0.366096	-2.7552	0.00785906	0.142451	-2.65699
FGF14-AS2	-0.842548	1.07187	-2.75465	0.00787083	0.142501	-2.71056
AC009542.2	-0.723151	2.22255	-2.75464	0.00787095	0.142501	-2.79294
TTLL10	-1.14285	-1.60055	-2.75417	0.00788086	0.142598	-2.55004
PGF	0.925335	3.34397	2.75246	0.00791715	0.143172	-2.80732
CPB2-AS1	-1.08464	-1.73613	-2.75158	0.00793599	0.14343	-2.54922
DPP7	0.764688	6.61607	2.74958	0.00797881	0.144034	-2.99632
RP11-202G11.2	-1.32686	-3.01639	-2.74942	0.00798213	0.144034	-2.52222
DPP3	0.522608	4.37036	2.74924	0.00798612	0.144034	-2.91084
RHEB	0.535677	5.71055	2.74911	0.00798887	0.144034	-2.9742
NR2F1-AS1	-0.744913	3.42661	-2.74864	0.00799899	0.144034	-2.89784
PLEKHF1	0.726119	2.66171	2.74864	0.00799903	0.144034	-2.77201
GAS2L1P2	-1.28191	-1.21702	-2.74852	0.00800161	0.144034	-2.58644
ECHDC2	-0.458899	6.95376	-2.74821	0.00800814	0.144068	-3.0235
CLTA	0.647671	5.96401	2.74765	0.0080203	0.144085	-2.98322
RP11-320H14.1	-1.33018	-2.84476	-2.74733	0.00802716	0.144085	-2.52977
PTPRB	-0.830815	5.9923	-2.74733	0.00802716	0.144085	-3.0093
TPTE2P5	-0.685231	1.12893	-2.74732	0.00802746	0.144085	-2.72547
RP5-881L22.6	-1.43605	-2.68952	-2.74656	0.0080439	0.144264	-2.536
RP11-736K20.5	-0.721346	2.32676	-2.74643	0.00804667	0.144264	-2.82242
C14orf37	-0.639908	4.24312	-2.74586	0.00805898	0.144374	-2.9507
HOXB6	-0.746975	4.31648	-2.74572	0.00806205	0.144374	-2.95496
MTND2P5	-1.24515	-1.41021	-2.74492	0.00807926	0.1446	-2.58284
LINC00961	-0.77678	1.24607	-2.7441	0.00809718	0.144838	-2.74363
CCAT2	-0.957979	-0.763988	-2.74331	0.00811442	0.145063	-2.61483
TEDDM1	-0.786338	-0.474311	-2.7419	0.00814517	0.145508	-2.63049
SGOL1	0.779114	0.289971	2.74114	0.00816161	0.145508	-2.62387
G0S2	1.2627	5.77636	2.74106	0.00816357	0.145508	-2.97783
C15orf56	-1.01038	-0.465667	-2.74096	0.00816576	0.145508	-2.64102
LIPG	-0.909055	2.6346	-2.74083	0.00816858	0.145508	-2.86565
TOR3A	0.75056	4.7791	2.74043	0.00817724	0.145508	-2.94758
RP11-359J14.2	-0.563184	0.877729	-2.7404	0.00817794	0.145508	-2.71766
HOXD9	-0.762607	3.79515	-2.74036	0.00817877	0.145508	-2.94108
KCNK10	-1.28131	-0.447471	-2.74025	0.00818112	0.145508	-2.65368
AC005013.5	-0.972924	-1.3628	-2.73848	0.0082201	0.146066	-2.59169
ENPP7P4	-0.519587	0.92068	-2.73824	0.00822554	0.146066	-2.72526
ADTRP	-1.17296	-0.107353	-2.73819	0.00822652	0.146066	-2.67784
FUCA1P1	-1.19527	-2.6165	-2.73773	0.00823674	0.146165	-2.55391
LRP1B	-1.3135	1.8166	-2.73708	0.00825104	0.146336	-2.82729
ITPR1	-0.483665	7.20763	-2.73632	0.00826798	0.146553	-3.05709
ZNF622	0.585198	3.45385	2.73524	0.00829187	0.146893	-2.87428
CYB561A3	0.664841	6.00559	2.73497	0.00829779	0.146915	-3.0143
CAPN8	-1.35955	0.866265	-2.73423	0.00831432	0.147124	-2.76275
FAR2P1	-1.27548	-2.68782	-2.7336	0.00832843	0.147214	-2.56268
AZGP1P1	-1.42486	-2.8525	-2.73358	0.00832879	0.147214	-2.56111
CTC-513N18.6	-1.05475	-1.02003	-2.73333	0.00833444	0.147231	-2.62535
GMEB2	0.423542	4.51214	2.73275	0.00834735	0.147376	-2.96112
RP3-407E4.3	-1.36477	-1.42505	-2.73249	0.00835311	0.147394	-2.61513
RP4-682E18.1	1.64348	-3.01589	2.73207	0.0083626	0.147401	-2.54302
NFASC	-1.12457	7.3151	-2.73205	0.0083629	0.147401	-3.07413
OR51I2	-0.9567	-0.700448	-2.73133	0.00837918	0.147605	-2.64677
RP1-145M24.1	-0.716435	1.5336	-2.73086	0.00838965	0.147706	-2.79631
GPC5	-1.55434	0.330422	-2.72936	0.00842347	0.148218	-2.7433
ATP5F1P1	-0.819135	-0.767269	-2.7284	0.00844521	0.148517	-2.64333
ADH4	-1.14762	-1.59885	-2.72761	0.00846299	0.148655	-2.61012
ZNF79	0.403275	2.99977	2.72748	0.00846586	0.148655	-2.86443
AC007461.2	-1.2484	-1.5244	-2.72742	0.00846729	0.148655	-2.61772
SURF4	0.41913	6.97202	2.72661	0.00848568	0.148778	-3.06565
PAH	-2.37883	6.69594	-2.72632	0.00849233	0.148778	-3.0864
NDUFS8	0.459974	5.58882	2.72609	0.00849738	0.148778	-3.02704
RP11-696N14.1	-0.78109	1.31416	-2.726	0.00849945	0.148778	-2.79371
SYNE1	-0.590431	9.03435	-2.72546	0.00851176	0.148778	-3.10468
TMEM92	1.93836	-0.633658	2.72529	0.00851564	0.148778	-2.5853
FAM162B	-0.9925	-0.399612	-2.72519	0.00851803	0.148778	-2.6819
RRP12	0.607388	4.62113	2.72514	0.00851912	0.148778	-2.97802
ROS1	-1.69513	-0.915596	-2.72504	0.00852142	0.148778	-2.66986
NUP62	0.342113	5.84179	2.72488	0.00852492	0.148778	-3.0404
GADD45GIP1	0.643635	4.04001	2.72475	0.00852802	0.148778	-2.93925
CTD-3193O13.1	-1.02278	-0.64583	-2.7246	0.00853133	0.148778	-2.66617
TMEM240	0.921442	1.64456	2.7242	0.0085405	0.148855	-2.74123
RP11-670E13.6	1.46435	-2.04979	2.72376	0.00855054	0.148947	-2.56931
FAM169A	-1.03718	2.10253	-2.72337	0.00855943	0.149019	-2.87222
RP11-624M8.1	-1.32008	-0.496359	-2.72292	0.00856968	0.149028	-2.6916
HIST1H3D	1.11612	1.45155	2.72269	0.00857505	0.149028	-2.72859
NSUN6	-0.336273	3.18276	-2.72239	0.00858189	0.149028	-2.92701
LIF	1.2552	5.09898	2.72229	0.00858426	0.149028	-2.98866
FCF1P5	-0.687239	0.736748	-2.72219	0.00858662	0.149028	-2.75606
MRPL41	0.713572	4.86475	2.7221	0.00858852	0.149028	-2.99532
SLC22A24	-1.25153	0.450921	-2.72186	0.00859415	0.149043	-2.75758
MAPK15	-0.962708	2.04829	-2.72114	0.00861054	0.149215	-2.86617
ASIC2	-1.23504	0.121867	-2.72101	0.00861362	0.149215	-2.73338
SSR1P1	-1.18229	-3.58665	-2.71988	0.00863968	0.149558	-2.57853
RP11-440D17.4	-0.964147	-1.12763	-2.71974	0.00864293	0.149558	-2.64806
APCDD1L	-0.774242	1.58643	-2.7193	0.00865316	0.149652	-2.82856
CDC25A	0.720281	1.0386	2.71859	0.00866938	0.149819	-2.72513
CTD-2619J13.17	-0.444239	2.80534	-2.71803	0.00868235	0.149819	-2.91136
BRMS1	0.526014	3.76231	2.71769	0.00869027	0.149819	-2.94381
ZNF700	-0.435531	4.47046	-2.71747	0.00869536	0.149819	-3.02383
TRIM63	1.93017	6.71224	2.71732	0.00869891	0.149819	-3.05364
CNTN4-AS1	-1.22842	-1.72143	-2.71713	0.00870329	0.149819	-2.63068
RP11-930P14.2	0.773278	0.338727	2.71706	0.00870499	0.149819	-2.67912
NPW	2.27634	0.678678	2.71692	0.00870816	0.149819	-2.64059
ACY1	-0.82446	4.90683	-2.71676	0.00871183	0.149819	-3.05165
SLC9B2	0.722799	3.29103	2.71665	0.00871454	0.149819	-2.89963
EIF4G1	0.456407	8.1055	2.71661	0.00871544	0.149819	-3.11011
CH17-140K24.6	-1.19357	-2.08072	-2.71605	0.00872852	0.149926	-2.6175
HIST1H3J	1.33929	-0.216119	2.71558	0.00873937	0.149926	-2.63143
GAPDHP29	-1.43739	0.382777	-2.71531	0.00874565	0.149926	-2.77351
RP11-148K1.12	0.696035	2.13458	2.71503	0.00875231	0.149926	-2.8134
ALG3	0.449756	3.94271	2.71487	0.00875603	0.149926	-2.96719
DMRT3	1.43984	-3.02883	2.71469	0.00876023	0.149926	-2.58066
DNASE1L3	-1.07342	1.89715	-2.71467	0.00876053	0.149926	-2.87862
OTUB1	0.417624	5.43768	2.71466	0.00876082	0.149926	-3.04879
RP11-141M1.1	-0.805278	-0.0668222	-2.71448	0.00876509	0.149926	-2.72244
PLXNA1	0.503483	6.87506	2.71428	0.00876983	0.149926	-3.09159
RP4-717I23.3	-0.558654	5.11835	-2.71408	0.00877438	0.149926	-3.06084
RNF187	0.745551	6.86757	2.71319	0.0087952	0.1502	-3.08973
DDX17	-0.430649	10.1411	-2.71259	0.00880927	0.150349	-3.14052
AC021218.2	-1.47945	-0.416653	-2.71241	0.00881357	0.150349	-2.72916
FAM195B	0.618457	5.46986	2.71199	0.00882341	0.150435	-3.05218
CDK5	0.817298	2.60747	2.7114	0.00883728	0.150529	-2.85392
RP5-856G1.2	-1.62658	0.286777	-2.71135	0.0088385	0.150529	-2.78522
RP11-350A1.1	-1.62299	-0.594204	-2.7101	0.00886802	0.150949	-2.72443
RP3-388M5.8	-0.796895	-0.733156	-2.70874	0.00890012	0.151381	-2.69077
HMGA1	0.690684	5.11366	2.70862	0.00890306	0.151381	-3.04315
GLCE	-0.578185	4.52986	-2.70828	0.00891119	0.151413	-3.05161
HTRA3	1.38531	2.51688	2.70813	0.00891464	0.151413	-2.82735
AIF1L	-1.1032	7.12631	-2.70775	0.00892364	0.151484	-3.12935
PBX1	-0.713285	6.97651	-2.70723	0.00893603	0.151533	-3.12498
AC104655.2	0.976159	-1.67414	2.70723	0.00893617	0.151533	-2.61476
DLGAP4	0.411171	6.94415	2.70658	0.00895154	0.151699	-3.11275
SP4	-0.44964	3.70771	-2.70641	0.00895568	0.151699	-3.00883
CCRN4L	0.743529	3.79186	2.70594	0.00896683	0.151735	-2.95891
TRIM7	-0.632871	1.62778	-2.70554	0.00897642	0.151735	-2.85587
SACS	0.574122	6.12332	2.70543	0.00897896	0.151735	-3.09106
CREB3L1	1.36227	5.2502	2.70521	0.0089844	0.151735	-3.03416
ANXA3	-1.08735	2.10747	-2.70518	0.00898494	0.151735	-2.91847
GCM1	-1.41797	-1.98721	-2.7051	0.00898691	0.151735	-2.65216
CDCA2	1.59945	0.887976	2.70444	0.00900277	0.151869	-2.7118
GPI	0.525801	8.26928	2.70436	0.00900454	0.151869	-3.14109
WDR11-AS1	-0.687904	0.164246	-2.70317	0.0090331	0.152061	-2.75812
MAP1S	0.634981	5.3737	2.70282	0.00904155	0.152061	-3.06859
SLC5A6	0.477418	4.38437	2.70275	0.00904322	0.152061	-3.02465
HPS1	0.525845	6.10655	2.70252	0.00904894	0.152061	-3.09866
TGFA	-0.642692	3.46004	-2.70251	0.00904914	0.152061	-3.00743
RP11-88I18.2	-0.771118	2.72858	-2.70248	0.00904986	0.152061	-2.95754
CEP70	-0.496656	3.68643	-2.70248	0.0090499	0.152061	-3.01909
STRA13	0.507375	3.29602	2.70186	0.00906484	0.152138	-2.94602
MEIS2	-0.88527	4.92362	-2.70174	0.00906753	0.152138	-3.08736
SLC7A11	1.51693	2.65963	2.70148	0.00907388	0.152138	-2.84791
RP11-478K15.6	-1.31283	0.974437	-2.70148	0.00907396	0.152138	-2.8449
SUV39H1	0.971772	3.50067	2.70071	0.00909238	0.152349	-2.94154
SLC39A14	0.658644	6.15681	2.70055	0.00909625	0.152349	-3.10316
RP3-525L6.2	-0.736409	-0.261042	-2.69992	0.00911172	0.152453	-2.73882
HOXB4	-0.606372	3.83707	-2.69975	0.00911564	0.152453	-3.03612
RP11-737O24.3	-0.631375	1.51182	-2.69954	0.00912087	0.152453	-2.86528
ETNK2	-0.529022	3.7666	-2.69851	0.00914575	0.152453	-3.03337
RP11-283G6.3	0.968529	0.841007	2.69849	0.00914637	0.152453	-2.74229
ABCA9	-0.941343	3.21258	-2.69835	0.00914968	0.152453	-3.01157
MGC15885	-0.649262	-0.252747	-2.69834	0.00915006	0.152453	-2.74002
MOK	-0.468994	4.72871	-2.69808	0.00915626	0.152453	-3.08042
MPO	1.46753	-0.818585	2.69806	0.00915685	0.152453	-2.64642
TRIM31	1.50227	-2.77784	2.69798	0.00915877	0.152453	-2.61776
EMC8	0.311274	4.12187	2.69793	0.00915989	0.152453	-3.02496
RBM17P4	-0.722612	0.358437	-2.69789	0.0091609	0.152453	-2.78591
PPEF1	2.3131	-0.799743	2.69649	0.00919513	0.152941	-2.64239
CTD-2006C1.6	-1.19534	-1.2973	-2.69599	0.00920718	0.15306	-2.6986
RP11-438B23.2	-1.35579	-2.43608	-2.69551	0.00921912	0.153177	-2.65476
CTAGE6	-1.41135	-1.39557	-2.69506	0.00923014	0.153186	-2.70262
FZD9	1.36316	-1.0421	2.69494	0.00923293	0.153186	-2.65024
NUDT19	0.402519	4.09398	2.69455	0.00924258	0.153186	-3.02673
AC078842.4	-1.18358	-1.34639	-2.69431	0.0092484	0.153186	-2.69957
FTX	-0.483839	8.22766	-2.69417	0.00925196	0.153186	-3.17201
XXYLT1	0.375413	3.57632	2.69411	0.00925337	0.153186	-2.98954
AC007364.1	-1.11397	-0.732206	-2.69409	0.00925391	0.153186	-2.73402
RN7SKP198	-1.21137	-2.68746	-2.69297	0.00928146	0.15334	-2.65038
HYOU1	0.484772	6.62404	2.69295	0.00928197	0.15334	-3.13697
GPR157	1.05544	5.65344	2.69262	0.00929004	0.15334	-3.09187
RP5-921G16.1	-2.05046	-0.31802	-2.69236	0.00929637	0.15334	-2.79888
MKRN5P	-0.753826	2.2249	-2.69184	0.00930922	0.15334	-2.94266
RNFT2	0.943359	4.12874	2.69167	0.00931342	0.15334	-3.0075
RP11-83B20.4	1.01808	-1.06206	2.69165	0.00931399	0.15334	-2.66063
RP11-615I2.3	-1.23361	-2.25921	-2.69163	0.00931443	0.15334	-2.66549
CCL16	-1.12662	-1.94363	-2.69159	0.0093154	0.15334	-2.67473
RNFT1P2	-1.15719	-1.47667	-2.69158	0.00931577	0.15334	-2.69852
GALR1	-1.35936	-0.930303	-2.69153	0.00931706	0.15334	-2.73565
CALM3	0.382292	7.27108	2.69084	0.009334	0.153481	-3.15746
AC010148.1	-1.31999	-0.55401	-2.69078	0.00933545	0.153481	-2.76004
RP11-675F6.3	-1.23901	-1.64337	-2.69052	0.00934204	0.153509	-2.69366
SLC35B1	0.358818	4.27047	2.69028	0.00934788	0.153524	-3.05054
RP5-1112D6.8	-0.510473	4.4232	-2.68999	0.00935518	0.153563	-3.08606
ZNF483	-0.596224	4.0755	-2.68918	0.00937529	0.153756	-3.07454
CCDC186	-0.528045	5.14095	-2.68882	0.00938417	0.153756	-3.12122
MFAP3L	-0.75486	5.4665	-2.68854	0.00939119	0.153756	-3.13507
FERMT1	-0.853828	1.67712	-2.68844	0.00939354	0.153756	-2.91229
CHKA	0.498696	5.71825	2.6883	0.00939725	0.153756	-3.11998
PTPN4	-0.404334	5.48276	-2.68814	0.0094012	0.153756	-3.13081
PRKCA-AS1	-0.556033	2.28218	-2.68813	0.00940128	0.153756	-2.94665
STPG2-AS1	-1.06673	-0.183318	-2.68765	0.00941334	0.153873	-2.78393
CTDNEP1	0.457421	5.87207	2.68734	0.00942099	0.153917	-3.12786
SMG5	0.479213	6.87615	2.68689	0.00943245	0.154024	-3.15726
LENEP	-0.797173	-0.905473	-2.68654	0.00944108	0.154085	-2.7278
AVPR2	-0.789198	1.09073	-2.68575	0.0094609	0.154166	-2.86911
HMOX1	1.07011	6.5131	2.68572	0.00946172	0.154166	-3.14146
RP11-358B23.6	-0.568114	1.7326	-2.6856	0.00946464	0.154166	-2.90828
AC002064.5	-1.23294	-2.6056	-2.68547	0.00946791	0.154166	-2.669
KIAA1328	-0.365962	4.19128	-2.68508	0.00947764	0.154166	-3.08278
CAB39L	-0.522612	3.79236	-2.68504	0.00947877	0.154166	-3.06544
OR10A5	-1.19339	-1.89228	-2.68497	0.00948056	0.154166	-2.69381
TREH	-0.681753	1.92284	-2.68451	0.00949196	0.154272	-2.93117
MESTIT1	-0.920567	0.365533	-2.6841	0.00950242	0.154361	-2.82567
RP11-989F5.4	1.19331	-2.9727	2.68346	0.00951841	0.154505	-2.64853
HTR1DP1	-0.557406	0.632691	-2.68335	0.00952112	0.154505	-2.83247
NPR2	0.458016	4.57001	2.68273	0.00953691	0.154681	-3.08303
TFEC	-0.897661	4.80068	-2.68249	0.00954286	0.154697	-3.1301
SALL3	-2.0351	1.34011	-2.68214	0.00955183	0.154707	-2.94528
TOLLIP	0.758315	6.87712	2.68203	0.00955455	0.154707	-3.16472
SRM	0.534136	4.35299	2.68188	0.00955829	0.154707	-3.07006
CDT1	1.00097	2.09444	2.68149	0.00956831	0.154789	-2.87459
RSPH1	-0.985686	0.27833	-2.68048	0.00959378	0.155121	-2.83124
PTCSC3	-1.47271	-2.45353	-2.68025	0.00959963	0.155135	-2.68916
FDXR	0.661576	3.51591	2.67996	0.0096071	0.155176	-3.00474
SYT17	-0.830749	2.67638	-2.67899	0.00963191	0.155467	-3.01026
RP11-1069G10.1	-0.765237	3.41227	-2.67886	0.00963503	0.155467	-3.06332
LINC01159	-0.981372	2.47587	-2.67852	0.00964372	0.155527	-2.99816
TRIM47	0.745459	4.88237	2.67828	0.00965002	0.155548	-3.09893
SCML1	-0.613095	3.56831	-2.67782	0.00966169	0.155656	-3.07148
BAIAP2L1	0.563714	4.66283	2.67752	0.00966939	0.155671	-3.09671
CTC-439O9.1	-0.996977	-0.301296	-2.67711	0.00967973	0.155671	-2.79764
OSBPL1A	0.490272	6.19278	2.67696	0.00968361	0.155671	-3.16206
CHMP4B	0.495856	5.494	2.67688	0.0096856	0.155671	-3.13879
PSAP	0.809393	11.0292	2.67674	0.00968941	0.155671	-3.22647
SORBS3	0.586801	7.17327	2.67655	0.00969423	0.155671	-3.18622
POM121L1P	-1.3703	-1.87569	-2.67642	0.00969745	0.155671	-2.71886
LOXL4	1.22915	4.74736	2.67527	0.00972695	0.15605	-3.08053
POU3F1	1.79168	-0.339993	2.6748	0.00973926	0.15605	-2.70608
PDE1C	-0.800673	3.57782	-2.67474	0.00974063	0.15605	-3.08445
CHPF2	0.543078	6.31673	2.67472	0.00974125	0.15605	-3.16985
H2BFS	0.991783	-1.73662	2.67434	0.00975096	0.15605	-2.68456
CH507-42P11.1	0.991783	-1.73662	2.67434	0.00975096	0.15605	-2.68456
CRABP1	-1.56519	-1.54671	-2.67351	0.00977228	0.156312	-2.74889
BTN1A1	-0.959337	-1.03845	-2.67257	0.00979669	0.156544	-2.7574
RP11-264L1.2	-0.506127	3.24118	-2.67257	0.0097968	0.156544	-3.05556
RP11-242C19.2	-0.870398	-0.57479	-2.6711	0.00983479	0.157071	-2.78717
KLHL2P1	1.09449	-1.66142	2.67039	0.00985323	0.157285	-2.69359
IRAK1	0.613099	6.01272	2.67012	0.00986043	0.15732	-3.17118
KRT15	-1.38378	-1.40931	-2.66918	0.00988478	0.157628	-2.75801
HIPK2	-0.451755	8.56546	-2.66802	0.00991505	0.157954	-3.23716
FDPSP2	-1.6785	-1.84094	-2.66801	0.00991532	0.157954	-2.74794
SLC25A21-AS1	-0.845931	1.07593	-2.66749	0.00992914	0.158093	-2.91289
MYO3A	-0.970909	0.253432	-2.66728	0.0099344	0.158097	-2.8574
MBOAT2	-0.672873	4.49456	-2.66681	0.00994677	0.158213	-3.15104
PKNOX2	-0.885736	2.49743	-2.66601	0.00996784	0.158468	-3.02575
GALNT3	-0.721957	2.61993	-2.66579	0.00997368	0.15848	-3.03311
RP11-20I20.4	0.930299	3.98041	2.66549	0.00998163	0.158526	-3.06056
DGCR14	0.42515	3.62599	2.66494	0.00999596	0.158673	-3.06048
AHSG	-1.2505	-3.06581	-2.66453	0.010007	0.158768	-2.70574
RP11-263K4.1	-0.858061	-0.604905	-2.664	0.0100209	0.15886	-2.80047
TSR3	0.661233	4.18998	2.66371	0.0100286	0.15886	-3.09134
RP11-14I17.1	-0.808239	-0.48847	-2.66364	0.0100303	0.15886	-2.80829
TRPC7	-1.22061	-1.30701	-2.66354	0.0100331	0.15886	-2.77285
MOB3B	-0.643107	4.97023	-2.66298	0.0100479	0.158971	-3.17744
RP11-484O2.1	-1.2233	-0.933712	-2.66289	0.0100503	0.158971	-2.79519
TMTC1	-0.852582	5.75981	-2.66164	0.0100833	0.159413	-3.20802
CTD-2034I21.1	-1.3621	-2.15224	-2.66142	0.0100893	0.159427	-2.74023
EDNRB	-0.786996	4.5302	-2.66072	0.0101079	0.159641	-3.16943
SLMO1	0.675494	2.15576	2.66016	0.0101228	0.159716	-2.94129
RP11-423P10.2	-0.639462	2.82001	-2.65957	0.0101385	0.159716	-3.06066
FTCD-AS1	-1.29955	-0.678233	-2.65934	0.0101447	0.159716	-2.82147
ACP6	-0.469958	5.28713	-2.65932	0.0101453	0.159716	-3.19424
HIST1H2AG	1.01953	2.26778	2.65918	0.010149	0.159716	-2.93889
LINC01359	-0.550785	3.96723	-2.65887	0.0101573	0.159716	-3.13711
RP1-78B3.1	-0.505976	3.5725	-2.65833	0.0101718	0.159716	-3.11338
INTS5	0.408567	4.47473	2.6583	0.0101725	0.159716	-3.13595
RP11-203H2.1	-1.31857	-1.30006	-2.65785	0.0101846	0.159716	-2.7845
DCC	-1.05818	0.447348	-2.65785	0.0101847	0.159716	-2.89462
FAM45B	0.590376	0.732134	2.65756	0.0101925	0.159716	-2.84956
TAS2R4	-0.516021	2.45102	-2.65748	0.0101946	0.159716	-3.02845
SACS-AS1	1.13503	-0.239418	2.65738	0.0101973	0.159716	-2.76319
PABPC4	0.440523	6.82644	2.65736	0.0101978	0.159716	-3.22585
RP11-197N18.7	-0.5656	1.86757	-2.65734	0.0101984	0.159716	-2.98367
ADRA2C	-0.938512	2.25096	-2.65727	0.0102003	0.159716	-3.02854
TTTY9B	-1.41989	-3.34397	-2.65715	0.0102033	0.159716	-2.71844
[truncated: 29,304 more rows]

## Sheet: NMF_Cluster_3_DEGenes
GeneSymbol	logFC	AveExpr	t	P.Value	adj.P.Val	B
AK5	-4.68392	2.5895	-15.4769	4.33901e-22	1.35824e-17	39.6445
ARPP21	-5.70725	0.870543	-13.8023	7.71621e-20	1.2077e-15	34.5329
GABRQ	-6.17976	0.442047	-13.399	2.83306e-19	2.95611e-15	33.2441
LINC01105	-5.88811	-2.3553	-13.0966	7.61389e-19	5.95844e-15	31.7999
C4orf50	-4.45681	1.99799	-12.6889	2.94158e-18	1.8416e-14	31.125
DMRT1	-4.39651	-2.91617	-11.8275	5.48667e-17	2.86249e-13	27.5161
RPS4XP21	-4.14895	-3.02983	-11.6581	9.86112e-17	4.40975e-13	26.9165
RP11-343J3.2	-4.2208	-2.3261	-11.5194	1.59873e-16	6.25561e-13	26.6586
ARPP21-AS1	-3.52581	-3.24037	-11.1057	6.84512e-16	2.38081e-12	24.9958
CTC-830E23.1	-3.13043	-3.52484	-11.0707	7.75036e-16	2.42609e-12	24.6955
LUZP2	-6.34692	0.635133	-10.9298	1.2786e-15	3.63855e-12	25.2044
RP11-343B22.2	-4.89625	-1.93912	-10.7743	2.22805e-15	5.81204e-12	24.3573
RP11-375A5.1	-3.1555	-3.28779	-10.7249	2.65968e-15	6.4043e-12	23.6791
NPBWR2	-4.25742	-2.24146	-10.2617	1.41846e-14	3.17157e-11	22.5228
HTR3A	-4.65774	-1.85349	-10.0862	2.69166e-14	5.61714e-11	22.0092
ITIH1	-5.83139	-0.857994	-9.92781	4.81275e-14	9.41584e-11	21.6139
CPA6	-4.95782	0.394178	-9.79694	7.7938e-14	1.43511e-10	21.2089
ANK1	-3.54449	2.97135	-9.62841	1.45367e-13	2.49659e-10	20.6531
SPOCK3	-6.20499	-0.748577	-9.6172	1.51536e-13	2.49659e-10	20.5273
ZNF705D	-4.89612	-0.827035	-9.47986	2.52411e-13	3.9506e-10	20.0003
ZNF705A	-3.98403	-2.38904	-9.24125	6.15086e-13	8.78945e-10	18.9563
RP11-396J6.1	-4.68772	-1.81187	-9.24011	6.1773e-13	8.78945e-10	19.0599
RPL5P21	-3.15567	-3.46948	-9.07002	1.16923e-12	1.59132e-09	18.1049
MYT1	-5.04169	-0.0855906	-8.97076	1.69865e-12	2.20571e-09	18.2223
RP11-930P14.1	-3.78588	-1.65353	-8.96111	1.76158e-12	2.20571e-09	18.036
GRIA4	-4.29499	0.189022	-8.89869	2.22895e-12	2.68357e-09	17.955
CCDC162P	-2.74889	1.74925	-8.79512	3.29584e-12	3.8211e-09	17.6016
DCHS2	-3.279	3.73084	-8.74971	3.91347e-12	4.37512e-09	17.4292
LCN10	-3.57866	1.47506	-8.66684	5.35609e-12	5.78144e-09	17.1291
RNF165	-2.71666	2.81428	-8.62997	6.15959e-12	6.42712e-09	16.9935
RP11-556G22.1	-3.67129	-1.97654	-8.54189	8.60491e-12	8.3191e-09	16.5028
ZNF705C	-3.4418	-2.87148	-8.53791	8.73589e-12	8.3191e-09	16.3721
NEURL1	-3.25461	2.9813	-8.53688	8.7701e-12	8.3191e-09	16.646
RP11-308N19.1	-4.25962	0.270529	-8.49903	1.01266e-11	9.32336e-09	16.4973
RP11-527H14.4	-4.14237	-1.82152	-8.47568	1.1067e-11	9.89796e-09	16.3075
PRRT4	-3.29668	-1.50556	-8.43736	1.28036e-11	1.11293e-08	16.1525
KCNIP4-IT1	-3.58516	1.14827	-8.43024	1.31548e-11	1.11293e-08	16.2542
RP11-193H5.1	-3.84062	-2.69432	-8.27574	2.36993e-11	1.95226e-08	15.4954
COL28A1	-3.16927	3.12453	-8.16895	3.56256e-11	2.85946e-08	15.274
RP11-540H22.2	-3.14621	-2.89194	-8.13592	4.04166e-11	3.1629e-08	14.9297
IGDCC3	-3.26798	0.0356594	-8.04642	5.69083e-11	4.34488e-08	14.8178
KRT85	-3.2425	-3.11922	-7.98722	7.13763e-11	5.31114e-08	14.3778
RP11-1157N2__B.2	-3.58663	-2.42523	-7.9815	7.29576e-11	5.31114e-08	14.45
RP11-598O12.1	-2.83297	-1.27699	-7.95829	7.97367e-11	5.67272e-08	14.4164
ATOH1	-2.67039	-3.39801	-7.91922	9.26059e-11	6.44187e-08	14.0378
RP11-556G22.2	-3.31916	-2.05016	-7.90152	9.91033e-11	6.74398e-08	14.1776
RP3-525N10.2	-2.76083	0.612644	-7.88545	1.05395e-10	7.01954e-08	14.2312
TMEM53	-1.58595	3.58931	-7.85633	1.17839e-10	7.68484e-08	14.1065
TUB	-1.84448	5.8546	-7.84897	1.21208e-10	7.74324e-08	14.044
PKIB	-3.20095	1.74137	-7.84146	1.24748e-10	7.81e-08	14.0674
KLF14	-3.65698	-1.80725	-7.82994	1.30384e-10	8.00275e-08	13.9483
RP11-308N19.3	-3.35642	-2.81933	-7.77904	1.58479e-10	9.54013e-08	13.6783
RP11-63I8.1	-2.93537	-1.16174	-7.74643	1.79597e-10	1.0433e-07	13.6576
NKX2-8	-3.61262	-2.25026	-7.74588	1.79978e-10	1.0433e-07	13.6216
JAKMIP3	-3.04393	1.94827	-7.66787	2.42777e-10	1.38175e-07	13.4182
RP1-177I10.1	-2.89732	-3.28857	-7.65173	2.58297e-10	1.44384e-07	13.1367
LINC01163	-4.17547	-1.86147	-7.60913	3.04185e-10	1.67051e-07	13.1606
CCDC136	-3.45086	3.90934	-7.53306	4.07367e-10	2.19859e-07	12.8734
NEK4P2	-3.58558	-2.03811	-7.52251	4.24222e-10	2.25075e-07	12.8176
RP11-556G22.3	-3.49388	-1.9053	-7.50218	4.58661e-10	2.39291e-07	12.7485
LINC00940	-3.55	-1.38359	-7.49317	4.74816e-10	2.43659e-07	12.7431
ANKRD30B	-5.77633	2.07941	-7.43511	5.93446e-10	2.99623e-07	12.5305
CACNA1S	-3.12572	-1.17017	-7.41189	6.4883e-10	3.22386e-07	12.4411
RP11-259O2.1	-4.30513	-0.0612034	-7.37789	7.39357e-10	3.61626e-07	12.3511
NPM1P5	-2.87429	-1.789	-7.31949	9.25338e-10	4.42463e-07	12.0712
PDPN	-2.50492	2.27767	-7.31737	9.32899e-10	4.42463e-07	12.1062
RP11-527H14.6	-3.17253	-2.86686	-7.30183	9.90294e-10	4.62674e-07	11.9486
RP11-219A15.1	-3.75758	-2.34636	-7.28894	1.04058e-09	4.79018e-07	11.9611
AC104777.3	-3.57573	-1.98665	-7.26029	1.16164e-09	5.26997e-07	11.8673
AP000641.1	-3.35405	-2.75012	-7.24255	1.24359e-09	5.56118e-07	11.7576
KLHL32	-2.05223	0.992131	-7.23297	1.29021e-09	5.68838e-07	11.8139
ABCC13	-4.81562	-0.468426	-7.22033	1.35439e-09	5.88841e-07	11.7674
OVGP1	-2.58965	2.70909	-7.21402	1.38763e-09	5.95028e-07	11.707
RP11-123K19.1	-3.21003	-1.65025	-7.20025	1.46306e-09	6.18892e-07	11.6529
AGAP1	-1.33349	6.8551	-7.15345	1.75119e-09	7.30901e-07	11.4118
SLC46A2	-2.54035	2.29462	-7.13796	1.85852e-09	7.51219e-07	11.431
PCP4	-4.29726	0.521564	-7.13621	1.8711e-09	7.51219e-07	11.4491
RP11-95G17.2	-3.04491	-1.95721	-7.13435	1.88447e-09	7.51219e-07	11.3957
CDH24	-2.08297	4.20582	-7.13278	1.89587e-09	7.51219e-07	11.3704
RP11-707A18.1	-3.86466	-0.321259	-7.09716	2.17387e-09	8.50609e-07	11.3116
CNKSR2	-3.4877	3.41886	-7.0854	2.27432e-09	8.78927e-07	11.1998
RPRM	-3.48847	1.0979	-7.06096	2.49811e-09	9.47024e-07	11.1615
NALCN-AS1	-2.73862	-2.3464	-7.05961	2.51104e-09	9.47024e-07	11.0984
EIF4BP2	-2.23654	0.0400175	-7.0217	2.90456e-09	1.07138e-06	11.0319
MCF2	-2.80311	0.99903	-7.02128	2.90923e-09	1.07138e-06	11.0248
AC012501.1	-2.92086	-3.64991	-7.01244	3.00961e-09	1.09546e-06	10.8329
DENND1A	-1.03839	6.02708	-7.0001	3.15561e-09	1.1354e-06	10.8473
ZNF705G	-2.79528	-3.02739	-6.97642	3.45588e-09	1.22931e-06	10.7441
RP11-179B15.6	-2.6559	-3.21253	-6.96649	3.59012e-09	1.26271e-06	10.693
ZIC5	-3.86764	-1.95469	-6.92942	4.13904e-09	1.43408e-06	10.6711
CPN2	-5.27234	1.58173	-6.92754	4.16896e-09	1.43408e-06	10.6427
AC110781.3	-2.00512	2.97219	-6.8988	4.65494e-09	1.58384e-06	10.5293
SPERT	-2.56005	-2.79966	-6.875	5.09995e-09	1.7166e-06	10.3922
EIF4A2P1	-2.68926	-2.00132	-6.86933	5.21198e-09	1.71726e-06	10.4226
DCAF12L1	-3.56003	0.595885	-6.86738	5.2512e-09	1.71726e-06	10.455
DHX58	-1.72845	4.51453	-6.86662	5.26649e-09	1.71726e-06	10.3687
NPTX2	-4.27943	1.06751	-6.84124	5.80472e-09	1.86081e-06	10.3394
AP001505.10	-2.20454	-0.19732	-6.83808	5.87553e-09	1.86081e-06	10.354
RP11-344F13.1	-2.5941	-1.77452	-6.83766	5.88508e-09	1.86081e-06	10.3176
FAM135B	-2.9188	2.27831	-6.82085	6.27679e-09	1.96482e-06	10.2428
RP11-526A4.1	-2.69627	-3.07392	-6.81489	6.42187e-09	1.99034e-06	10.1644
PKDREJ	-2.02314	2.90846	-6.80351	6.70809e-09	2.03218e-06	10.1709
RP11-283C24.1	-3.10811	-3.24635	-6.80149	6.76027e-09	2.03218e-06	10.1224
POPDC3	-3.52957	-0.476869	-6.79983	6.80338e-09	2.03218e-06	10.2157
SYTL5	-3.48757	1.74675	-6.79829	6.84379e-09	2.03218e-06	10.1696
ZYG11AP1	-3.81343	-1.63736	-6.79552	6.91681e-09	2.03218e-06	10.1898
FAM207A	-1.87982	3.01027	-6.79441	6.94639e-09	2.03218e-06	10.1369
CTD-2572N17.1	-3.13672	-2.34258	-6.77488	7.48625e-09	2.16983e-06	10.0825
AC104777.4	-3.62899	-1.54838	-6.77076	7.60526e-09	2.18411e-06	10.0993
PPEF1	-3.62855	-0.799743	-6.73464	8.73391e-09	2.48543e-06	9.97561
SLC38A8	-5.6524	1.13368	-6.68627	1.0511e-08	2.96419e-06	9.75206
RP11-36B6.1	-2.8745	-2.53055	-6.67363	1.10321e-08	3.08338e-06	9.70273
AC013410.1	-3.50698	-1.63607	-6.66686	1.13214e-08	3.13624e-06	9.71781
CYP2U1	-1.58516	4.81145	-6.65149	1.20074e-08	3.29708e-06	9.55704
RP11-259O2.2	-3.72813	-1.58327	-6.62812	1.31306e-08	3.57415e-06	9.58067
NEBL	-2.18442	5.36049	-6.61546	1.37819e-08	3.71908e-06	9.4049
AC016712.1	-2.77354	-0.191589	-6.60781	1.41908e-08	3.78363e-06	9.51064
AC016831.6	-2.69819	-2.34154	-6.60649	1.42628e-08	3.78363e-06	9.46363
HMGB3P9	-1.65003	1.56505	-6.60354	1.4425e-08	3.79449e-06	9.47406
AC007563.1	-3.20845	-1.50009	-6.59759	1.47565e-08	3.84935e-06	9.46633
DFNB31	-1.73275	5.41438	-6.58994	1.51945e-08	3.93085e-06	9.31236
SARDH	-2.20409	4.54104	-6.58735	1.53458e-08	3.93747e-06	9.31693
SLC18A2	-2.45648	1.35482	-6.58218	1.56521e-08	3.95309e-06	9.38964
NIM1K	-2.24138	1.53836	-6.58107	1.57187e-08	3.95309e-06	9.38177
CASC6	-3.30169	-2.94144	-6.57843	1.58781e-08	3.95309e-06	9.35667
AQP12B	-3.08418	-2.16304	-6.57642	1.60007e-08	3.95309e-06	9.36996
SLC4A10	-3.5841	1.24514	-6.57581	1.60382e-08	3.95309e-06	9.35582
ERVFRD-1	-2.9018	3.41242	-6.57078	1.63495e-08	3.9758e-06	9.27958
AC090505.5	-2.71962	-3.28297	-6.57022	1.63843e-08	3.9758e-06	9.27764
AC104777.2	-4.02026	-0.0948712	-6.56009	1.7031e-08	4.10092e-06	9.32755
DMBX1	-4.99459	1.01036	-6.52372	1.95694e-08	4.6762e-06	9.15538
FBXO40	-3.58758	-1.02674	-6.51651	2.0116e-08	4.77038e-06	9.17767
RP11-342F21.1	-3.8609	-1.68454	-6.49853	2.15453e-08	5.07093e-06	9.10949
GPM6A	-2.84456	2.02787	-6.4883	2.24038e-08	5.23363e-06	9.01469
STARD10	-1.46848	4.20297	-6.46588	2.44042e-08	5.65871e-06	8.88033
AC104777.1	-3.21225	-1.76426	-6.44292	2.66382e-08	6.13128e-06	8.90073
SGTB	-1.45806	4.29077	-6.43532	2.74217e-08	6.26557e-06	8.76139
NCKAP5	-1.77308	4.51536	-6.42703	2.83023e-08	6.4199e-06	8.72459
C17orf102	-2.76233	-0.792184	-6.42216	2.88327e-08	6.49317e-06	8.83392
RP11-259O2.3	-2.47742	-3.51948	-6.40961	3.02455e-08	6.76268e-06	8.68683
RP11-138I17.1	-3.99846	-2.09777	-6.40101	3.12532e-08	6.93843e-06	8.75299
ASB18	-2.90037	-0.578212	-6.39522	3.19514e-08	7.04347e-06	8.73553
NPC1L1	-3.71023	1.56001	-6.37856	3.40443e-08	7.45237e-06	8.61173
TRIP13	-1.9648	1.09773	-6.37279	3.48007e-08	7.56504e-06	8.6341
PTCHD3P3	-2.6085	-2.77885	-6.36068	3.64445e-08	7.86773e-06	8.56283
AP006547.3	-3.62592	-1.51948	-6.35413	3.73643e-08	7.97239e-06	8.5863
DLG5	-1.31371	6.94146	-6.35361	3.74386e-08	7.97239e-06	8.40865
TXLNB	-2.53689	2.05013	-6.33655	3.99504e-08	8.44979e-06	8.45878
RP1-92C4.1	-3.08912	-3.37427	-6.32011	4.25289e-08	8.93186e-06	8.40911
ARHGAP36	-3.21496	-2.72895	-6.31844	4.28003e-08	8.93186e-06	8.42964
CRB2	-2.41191	3.54729	-6.31567	4.32535e-08	8.96665e-06	8.3263
BCAS4	-1.41968	4.08124	-6.30158	4.56362e-08	9.39835e-06	8.27177
DUXAP6	-2.75359	-3.09312	-6.2937	4.70234e-08	9.62074e-06	8.31581
RP11-491F9.3	-2.62158	-2.40074	-6.29126	4.74624e-08	9.6475e-06	8.33412
RP11-876N24.3	-4.19422	-2.72227	-6.28391	4.88077e-08	9.8137e-06	8.3238
AC068491.2	-1.75936	1.37065	-6.2822	4.91261e-08	9.8137e-06	8.29765
RP11-861E23.2	-2.36372	-3.63824	-6.28078	4.93915e-08	9.8137e-06	8.2221
RP11-556N21.1	-3.78217	-0.702641	-6.28002	4.95341e-08	9.8137e-06	8.31445
RP11-890B15.2	-2.7113	-1.29448	-6.24335	5.69413e-08	1.12041e-05	8.18345
ZDHHC11B	-1.94852	3.60919	-6.24184	5.72679e-08	1.12041e-05	8.06144
RP11-294N21.3	-2.72237	-1.58369	-6.23691	5.83512e-08	1.13451e-05	8.15792
CASC9	-3.37218	-1.39946	-6.22556	6.09216e-08	1.17718e-05	8.12107
STK25P1	-2.44241	-2.40342	-6.22328	6.14512e-08	1.18013e-05	8.08209
LINC01505	-2.46891	-3.25181	-6.21806	6.26811e-08	1.19641e-05	8.02837
IL31RA	-2.5449	-0.424048	-6.20755	6.52301e-08	1.23751e-05	8.05339
RP13-39P12.3	-1.72933	2.64118	-6.1848	7.11106e-08	1.34095e-05	7.89212
RPS23P4	-2.75716	-3.5572	-6.17182	7.46986e-08	1.39251e-05	7.86277
LGI3	-4.49106	3.46252	-6.1717	7.47346e-08	1.39251e-05	7.77971
RP11-806K15.1	-2.52676	-2.66978	-6.16735	7.59775e-08	1.40729e-05	7.88008
EVI5	-1.32633	5.62979	-6.15106	8.08147e-08	1.48808e-05	7.67942
AL121578.2	-3.00937	-2.33915	-6.12182	9.02829e-08	1.6527e-05	7.73699
CACNA2D1	1.45827	4.61794	6.11915	9.11992e-08	1.65977e-05	7.64437
ZNF705B	-2.88726	-3.26563	-6.10454	9.63872e-08	1.73921e-05	7.64372
COL6A4P1	-2.17919	-1.25138	-6.10375	9.6675e-08	1.73921e-05	7.68009
ASCL1	-3.10844	-1.85301	-6.09421	1.00231e-07	1.79287e-05	7.64532
RP11-575M22.1	-1.79339	0.774387	-6.08114	1.05312e-07	1.87305e-05	7.5796
APH1B	1.49306	3.98043	6.06407	1.12332e-07	1.98663e-05	7.47442
PF4V1	-2.65586	-1.29769	-6.05589	1.15863e-07	2.03756e-05	7.51019
AC113607.2	-2.47006	-3.13659	-6.04585	1.20345e-07	2.10455e-05	7.43017
RP11-624L4.2	-2.36567	-2.25347	-6.03456	1.25588e-07	2.18404e-05	7.41941
DCBLD1	-0.975355	4.33923	-6.03284	1.26408e-07	2.18616e-05	7.27999
SHC3	-1.69623	2.78042	-6.02887	1.28318e-07	2.207e-05	7.31052
RP11-119H12.5	-2.30817	-1.97396	-6.02549	1.29967e-07	2.22315e-05	7.3915
AC000089.3	-1.69008	0.485283	-6.00796	1.38861e-07	2.36237e-05	7.32397
BEND3P2	-3.17926	-1.60142	-6.00275	1.41615e-07	2.39621e-05	7.32006
RP11-216L13.16	-3.13623	-3.1704	-5.996	1.45272e-07	2.44486e-05	7.26815
RP11-236J17.7	-2.69075	0.296663	-5.97028	1.60073e-07	2.67955e-05	7.17581
RP11-397G17.1	-4.09134	0.329846	-5.96559	1.62925e-07	2.71279e-05	7.13821
LMX1B	-3.65846	2.755	-5.96371	1.64084e-07	2.71762e-05	7.04415
LINC00323	-2.69031	0.320704	-5.93787	1.80865e-07	2.96547e-05	7.06172
CARHSP1	-0.826167	5.85798	-5.93776	1.80943e-07	2.96547e-05	6.8925
CR392000.1	-3.27143	-2.41122	-5.93575	1.82321e-07	2.9725e-05	7.07612
RPL7P28	-2.38915	-2.03082	-5.9325	1.84561e-07	2.99343e-05	7.06322
C3orf22	-2.28901	-0.745958	-5.93101	1.85604e-07	2.99483e-05	7.06122
CTD-2046I8.1	-2.71017	-3.53813	-5.91024	2.00696e-07	3.21299e-05	6.94666
RP11-119H12.6	-2.26149	-1.43508	-5.90961	2.01178e-07	3.21299e-05	6.98686
TSPAN11	-1.71648	3.60312	-5.9046	2.05005e-07	3.2575e-05	6.82194
DTNBP1	-0.8479	4.0358	-5.9026	2.06554e-07	3.26554e-05	6.81554
SOX11	-4.16017	3.32043	-5.89998	2.08597e-07	3.26924e-05	6.78459
AC104809.2	-3.22116	-0.686552	-5.89962	2.08877e-07	3.26924e-05	6.94102
FBXO2	-2.33506	1.5233	-5.89821	2.09993e-07	3.27035e-05	6.87664
MLPH	3.4155	5.89679	5.88889	2.17479e-07	3.37018e-05	6.8147
CDKN1C	-2.20562	4.20501	-5.86057	2.41914e-07	3.73036e-05	6.63065
SNTG2	-2.48085	-0.64089	-5.85688	2.45287e-07	3.76373e-05	6.7923
RIMS1	-2.54068	-0.726458	-5.85558	2.46494e-07	3.76373e-05	6.79106
FAM171B	-1.44723	4.35854	-5.85429	2.47685e-07	3.76373e-05	6.61751
FAF1	-0.949966	5.51923	-5.85026	2.51471e-07	3.8028e-05	6.57845
RP11-650J17.1	-2.21507	1.4094	-5.84785	2.5375e-07	3.81882e-05	6.70297
RP11-140A10.3	-2.56649	-3.44676	-5.83472	2.66579e-07	3.99268e-05	6.68466
RP11-148B18.3	-2.16679	-2.09906	-5.83188	2.6943e-07	4.01617e-05	6.70508
SDCCAG3	-1.0765	4.94284	-5.82546	2.7601e-07	4.09476e-05	6.49882
AC116614.1	-2.53074	-1.65502	-5.82085	2.80824e-07	4.14653e-05	6.67206
NCKAP5-IT1	-2.14139	-0.917996	-5.81873	2.83068e-07	4.16004e-05	6.66335
NRBF2P1	-2.93597	-1.77014	-5.80043	3.03177e-07	4.43474e-05	6.59977
POU4F1	-2.80788	-2.38241	-5.79731	3.06744e-07	4.46605e-05	6.58441
CDH1	3.3492	6.72853	5.79377	3.10836e-07	4.50468e-05	6.4258
RP11-339F13.2	-2.8536	-2.1105	-5.78858	3.16944e-07	4.57202e-05	6.55651
TTLL2	-2.31708	-0.661795	-5.78123	3.25794e-07	4.67814e-05	6.52517
RDH12	-3.32825	1.31183	-5.77715	3.30812e-07	4.72849e-05	6.42606
TOX2	-2.12153	2.17306	-5.77349	3.35382e-07	4.77202e-05	6.40034
AC016909.1	-1.75935	0.822916	-5.77175	3.37571e-07	4.78144e-05	6.45934
UCK1	-1.29521	5.13266	-5.7597	3.53155e-07	4.97964e-05	6.24908
RP11-82L18.2	-1.97722	-0.351548	-5.74676	3.7068e-07	5.20331e-05	6.40123
IQSEC1	-1.04306	7.63873	-5.73984	3.80405e-07	5.31599e-05	6.13431
CXorf57	-1.96792	2.88405	-5.72975	3.95036e-07	5.47299e-05	6.2137
KY	-1.68388	2.23788	-5.72968	3.95136e-07	5.47299e-05	6.24783
SERGEF	-0.91992	3.22608	-5.71061	4.24334e-07	5.85151e-05	6.15025
PRDM12	-2.63289	-2.18775	-5.70685	4.30339e-07	5.90829e-05	6.26829
CTD-2550O8.7	-2.24628	-2.92743	-5.69853	4.43929e-07	6.06826e-05	6.22027
TPTE2P6	-2.81318	-0.368113	-5.69662	4.47105e-07	6.07364e-05	6.21296
PMEL	-4.64617	3.29543	-5.69596	4.48203e-07	6.07364e-05	6.04029
AC005537.2	-2.64444	-1.75316	-5.68095	4.74047e-07	6.39616e-05	6.17796
KRT9	-2.49444	-3.07026	-5.67435	4.85873e-07	6.52758e-05	6.13545
HES6	-2.25962	1.98616	-5.67227	4.89649e-07	6.55021e-05	6.03391
ZNF804A	-2.20105	0.635035	-5.66439	5.04269e-07	6.71707e-05	6.07264
SYT14	4.48435	3.69459	5.6527	5.26734e-07	6.98659e-05	6.06982
MED15P5	-2.58809	-2.87351	-5.64424	5.43597e-07	7.17984e-05	6.03929
NPM1P11	-2.51051	-1.95538	-5.63777	5.56875e-07	7.29871e-05	6.0261
ANKRD30BP1	-3.09967	-2.54639	-5.63758	5.5726e-07	7.29871e-05	6.02434
LRRC14B	-2.31291	0.801533	-5.63513	5.62384e-07	7.32648e-05	5.95915
RP11-21A7A.2	-2.4055	-0.913983	-5.63433	5.64062e-07	7.32648e-05	6.00661
RRP15	-2.05997	4.56799	-5.63279	5.67309e-07	7.33822e-05	5.79484
ALDH5A1	-1.24328	5.87477	-5.63049	5.7219e-07	7.37089e-05	5.76504
RP11-355N15.1	-1.86632	1.96545	-5.62781	5.77929e-07	7.41431e-05	5.88421
BEND3	-1.21213	3.53556	-5.62383	5.86544e-07	7.49412e-05	5.81887
AC104772.1	-2.69398	-1.67628	-5.61744	6.00677e-07	7.64349e-05	5.95453
LYSMD4	-1.11039	4.19967	-5.61398	6.08467e-07	7.71127e-05	5.75306
GNB1L	-1.92301	3.32469	-5.61225	6.12399e-07	7.7298e-05	5.76713
CPNE4	-2.47339	0.0181975	-5.60617	6.26416e-07	7.87176e-05	5.88307
C10orf113	-1.98333	-0.779393	-5.6052	6.28675e-07	7.87176e-05	5.90701
MYT1L	-2.56608	-1.49337	-5.60193	6.36373e-07	7.9364e-05	5.89882
TUB-AS1	-2.73139	1.02124	-5.5956	6.51528e-07	8.09316e-05	5.79563
OPCML-IT1	-2.62098	-3.55966	-5.59012	6.64939e-07	8.22711e-05	5.83431
SCDP1	-2.52324	-1.93777	-5.58177	6.85921e-07	8.4533e-05	5.83034
2021-03-03	-1.35983	2.2939	-5.57831	6.94804e-07	8.5292e-05	5.7079
RP11-117L5.3	-3.46633	0.57582	-5.57457	7.04531e-07	8.61482e-05	5.72606
RAET1E	-1.83706	1.06984	-5.57073	7.14641e-07	8.70444e-05	5.72495
KPNA7	-2.10188	-2.05377	-5.55514	7.57247e-07	9.18763e-05	5.7357
UBE2QL1	-2.61622	2.84432	-5.55256	7.64532e-07	9.21539e-05	5.56043
LECT2	-2.20014	-1.28499	-5.55225	7.65422e-07	9.21539e-05	5.72491
RP11-568J23.8	-2.02652	-1.44857	-5.54431	7.88323e-07	9.45474e-05	5.69903
LCE1E	-3.45685	-2.59228	-5.53648	8.11541e-07	9.69606e-05	5.67226
AC079135.1	-2.02767	-3.42536	-5.53141	8.2697e-07	9.84283e-05	5.62461
AC145676.2	-1.27634	3.43544	-5.52606	8.43537e-07	0.00010002	5.46415
RP11-286E11.2	-1.77796	0.678824	-5.51872	8.66792e-07	0.000102389	5.55635
NELFA	-0.987946	5.04817	-5.51359	8.83438e-07	0.000103963	5.36543
AF003626.1	-2.32181	-3.67232	-5.51059	8.9333e-07	0.000104734	5.55394
KCNJ3	-1.96167	3.98371	-5.50211	9.21832e-07	0.000107672	5.34078
STK39	-0.928569	4.70058	-5.48482	9.82765e-07	0.000114362	5.27693
DPYSL4	-2.06884	0.654078	-5.48072	9.97817e-07	0.000115684	5.42209
RP11-351I21.6	-2.16333	0.77584	-5.47888	1.00463e-06	0.000116044	5.4065
RP11-378I6.2	-2.34129	-2.7629	-5.4572	1.0885e-06	0.000125269	5.39155
SFTPC	-2.69314	-2.16781	-5.45588	1.09383e-06	0.000125422	5.3921
CNTFR	-2.70046	2.02272	-5.44448	1.14086e-06	0.000130337	5.20619
TLL2	-1.94914	0.139018	-5.44218	1.15062e-06	0.000130959	5.30492
RAMP1	-2.39874	2.10433	-5.44123	1.15467e-06	0.000130959	5.20347
KCNH2	-2.52878	2.49514	-5.43889	1.16468e-06	0.000131617	5.16865
AL121578.5	-2.48589	-2.86981	-5.43476	1.1826e-06	0.000133161	5.31442
RP11-807H7.2	-2.38619	-2.57971	-5.42998	1.20366e-06	0.000135047	5.30023
AC007557.4	-2.42442	-3.26479	-5.42795	1.21271e-06	0.000135576	5.28403
RP11-119H12.4	-1.84999	0.186977	-5.42609	1.22107e-06	0.000136025	5.25219
ATP6V0CP2	-2.01494	-3.92005	-5.4215	1.24192e-06	0.000137857	5.2408
TOR3A	-1.30314	4.7791	-5.41411	1.27625e-06	0.000141168	5.01377
AMZ1	-2.13049	3.5658	-5.40825	1.3041e-06	0.000143741	5.0244
HIGD1AP6	-2.4836	-3.18926	-5.3928	1.38055e-06	0.000151633	5.16673
ARGFX	-2.33166	-3.08493	-5.38965	1.3967e-06	0.00015287	5.15504
MOGAT1	-2.54659	0.748387	-5.37864	1.45449e-06	0.00015864	5.04545
UBR5	-0.73188	7.69262	-5.37506	1.47377e-06	0.000160186	4.8169
TPPP	-1.55562	5.7298	-5.36498	1.52947e-06	0.000165665	4.80894
ALX4	-1.82154	1.1658	-5.34431	1.65031e-06	0.000178136	4.92233
CCDC144A	-2.76918	3.9201	-5.34183	1.66543e-06	0.000179151	4.7601
FBXL21	-2.33184	1.52576	-5.33901	1.68273e-06	0.000180393	4.86397
MAP1A	1.92408	5.93763	5.33016	1.73835e-06	0.000185397	4.75342
ZNF705E	-1.722	-0.175292	-5.32971	1.74126e-06	0.000185397	4.92559
TSPEAR	-2.52496	-0.216297	-5.32321	1.7833e-06	0.00018923	4.89102
RP11-117L5.4	-2.83302	-1.84684	-5.32095	1.79817e-06	0.000190163	4.92142
USP32P1	-2.82246	2.91471	-5.31856	1.81403e-06	0.000191194	4.7163
HSPD1P10	-2.05271	-3.43288	-5.316	1.83114e-06	0.000192349	4.89304
ARHGAP20	-1.66736	2.55841	-5.30002	1.94176e-06	0.000203288	4.69249
AC016831.3	-2.18968	-3.39599	-5.28427	2.05717e-06	0.000214652	4.7896
IL17D	-1.55269	0.948547	-5.28054	2.08549e-06	0.000216884	4.7174
INPP5A	-0.784371	4.74888	-5.27365	2.13875e-06	0.000221686	4.51996
RP11-447H19.1	-1.93581	-1.28434	-5.26112	2.23919e-06	0.000231331	4.7153
RP11-25H12.1	-3.03628	-1.75556	-5.25537	2.28675e-06	0.000235468	4.69079
CHST6	-2.93711	2.56568	-5.252	2.31516e-06	0.00023716	4.48861
LPA	-3.38203	-0.103292	-5.25162	2.31834e-06	0.00023716	4.61963
ELDR	-3.08247	-1.95176	-5.23507	2.46297e-06	0.000251135	4.62372
GLIS1	-2.00017	4.79607	-5.2307	2.50266e-06	0.000254353	4.35011
ZDHHC11	-1.64105	4.05065	-5.22786	2.52876e-06	0.000256174	4.36776
LINC00163	-2.10385	-1.88254	-5.2216	2.58721e-06	0.00026125	4.58478
ENPP7	-3.10857	-0.0642795	-5.21732	2.62794e-06	0.000264509	4.50264
PLOD2	2.15541	5.68126	5.21581	2.64251e-06	0.000265123	4.36916
JPH1	-1.80106	2.10268	-5.21174	2.68204e-06	0.00026823	4.40073
RP11-6O2.2	-2.42496	0.43304	-5.19672	2.83306e-06	0.000282431	4.42037
RPL23AP69	-2.20678	-3.14623	-5.19233	2.87888e-06	0.000286088	4.48271
RN7SKP154	-2.01008	-1.79345	-5.18601	2.94594e-06	0.000291825	4.46325
TANGO2	-1.65489	6.75834	-5.18403	2.9673e-06	0.000293014	4.14219
PRR5	-1.50641	5.63478	-5.18246	2.98424e-06	0.00029376	4.16282
CDHR1	-3.02741	2.68724	-5.17939	3.0179e-06	0.000295919	4.23371
BAIAP2L2	3.13605	4.89704	5.17873	3.02508e-06	0.000295919	4.32079
LBH	-1.16168	6.50167	-5.17281	3.09101e-06	0.000301427	4.11312
DEFB109P1	-2.23023	-2.71478	-5.17066	3.11541e-06	0.000302862	4.41396
RP11-193H5.2	-2.29289	-3.16585	-5.16846	3.14042e-06	0.000304349	4.4032
GUCY1B2	-3.24243	-0.716034	-5.16594	3.16931e-06	0.000306201	4.35273
B4GALNT3	-2.10431	3.05491	-5.1609	3.22799e-06	0.00031091	4.16547
C19orf12	-1.43441	6.00949	-5.15624	3.28323e-06	0.000315261	4.06188
RP11-123K19.2	-2.23785	-2.78664	-5.15465	3.30223e-06	0.000316115	4.35961
RP5-963E22.4	-3.31774	-1.64827	-5.15009	3.35747e-06	0.000320423	4.32184
DNAJC13	-1.04468	6.96903	-5.14716	3.39349e-06	0.000322877	4.01498
PRR18	-1.96362	-1.08598	-5.14619	3.40551e-06	0.000323038	4.31628
AC003984.1	-2.3931	-0.538489	-5.1425	3.45145e-06	0.000326407	4.27979
CDH7	-4.54025	0.342346	-5.13946	3.48983e-06	0.000327644	4.17454
RP11-355N15.3	-2.0512	0.457302	-5.13855	3.50142e-06	0.000327644	4.22964
AC009404.2	-1.04627	2.0093	-5.13847	3.50237e-06	0.000327644	4.17915
RP11-650J17.2	-2.45215	-1.69308	-5.13816	3.50639e-06	0.000327644	4.29428
TRAF6P1	-2.092	-2.99135	-5.12677	3.65447e-06	0.000340464	4.26346
GRIP2	-1.63488	3.64254	-5.12495	3.67876e-06	0.00034171	4.0235
RP11-28A22.2	-2.23938	-2.17471	-5.12311	3.70343e-06	0.000342983	4.25142
RP11-19C24.1	-2.52393	-3.13963	-5.11782	3.77513e-06	0.000348592	4.23468
GLI3	-1.14685	4.6191	-5.1141	3.82645e-06	0.000352292	3.95482
KCNK9	-3.76006	1.35478	-5.11188	3.85743e-06	0.000354103	4.04871
RP11-378I6.3	-2.38676	-2.69766	-5.09909	4.0406e-06	0.000369833	4.17224
GPR126	-1.61563	5.93245	-5.08821	4.20322e-06	0.000383154	3.82214
IL17RD	-1.24428	6.26208	-5.08772	4.21062e-06	0.000383154	3.81506
CADPS	-2.02022	1.73975	-5.08232	4.29378e-06	0.000389589	3.96613
BAI3	-1.85262	1.95163	-5.08033	4.32489e-06	0.000391278	3.95233
CNTFR-AS1	-2.12653	-2.70616	-5.07046	4.48223e-06	0.000404343	4.07588
PES1P1	-2.26536	-3.72436	-5.06867	4.51128e-06	0.000405795	4.06263
KCNQ4	-1.87707	3.8435	-5.06274	4.60926e-06	0.00041342	3.7917
CR2	-2.96089	1.08383	-5.05675	4.71012e-06	0.00042126	3.88758
NPM1P30	-2.07604	-0.8662	-5.05506	4.7391e-06	0.000422644	3.99701
GGACT	-1.73447	4.24963	-5.04391	4.93389e-06	0.000437993	3.70792
B3GNT9	1.22043	4.44498	5.04361	4.9392e-06	0.000437993	3.78473
KIF28P	-1.91968	-0.866774	-5.04162	4.9749e-06	0.000439913	3.95342
AGAP1-IT1	-0.970057	2.02442	-5.03284	5.13517e-06	0.000452806	3.81364
DRAXIN	-1.65938	-0.157071	-5.03088	5.1716e-06	0.000454737	3.8972
ANKRD46	-0.819876	4.3082	-5.02456	5.29106e-06	0.000463581	3.66038
RP11-351I21.7	-1.83679	0.251697	-5.024	5.30179e-06	0.000463581	3.84905
CLIC4P3	-1.91419	-3.2677	-5.01489	5.47895e-06	0.000477737	3.88624
RP11-418J17.3	-1.81869	-0.80694	-5.01071	5.56216e-06	0.000482457	3.84978
BVES-AS1	-2.10868	-2.13912	-5.01062	5.56391e-06	0.000482457	3.87196
AC113607.3	-2.39577	-2.91131	-5.009	5.5964e-06	0.000483934	3.87006
LCE1C	-2.22474	-3.32988	-5.00637	5.64983e-06	0.000487208	3.85876
AC012501.3	-2.94112	-0.508221	-5.00428	5.69262e-06	0.000489549	3.79187
CPEB4	-0.794036	7.61048	-5.00062	5.76809e-06	0.000494681	3.49203
GPR62	-1.5291	0.0436149	-4.99619	5.86091e-06	0.000501268	3.77145
UNC93A	-2.45025	-2.76554	-4.99484	5.88946e-06	0.000502338	3.82215
ZNF778	-0.734246	4.70099	-4.99366	5.91466e-06	0.000503115	3.53876
RP4-593M8.1	-1.92953	-1.37427	-4.99069	5.97815e-06	0.000507069	3.79313
RP11-378I6.1	-2.52314	-1.27458	-4.98998	5.99354e-06	0.000507069	3.7795
MAPK4	-2.45078	3.56315	-4.98091	6.19243e-06	0.000522484	3.50714
TMEM192	-0.990177	5.60748	-4.97132	6.4098e-06	0.000539371	3.4273
LONRF2P1	-2.32951	-2.78131	-4.965	6.55712e-06	0.000550288	3.72316
RN7SKP77	-1.8131	-3.84891	-4.96404	6.57989e-06	0.000550723	3.71265
KRT84	-2.52492	-2.90311	-4.9546	6.80693e-06	0.000568206	3.68781
KIAA1211	-1.44843	3.72938	-4.95117	6.89115e-06	0.000573707	3.41316
RP11-1109M24.15	-2.30443	-3.71551	-4.9494	6.93525e-06	0.000575846	3.668
RP11-574O16.1	-2.23733	-3.02898	-4.94655	7.00641e-06	0.000578924	3.66204
VWCE	-2.11186	3.67859	-4.94644	7.00931e-06	0.000578924	3.38752
RNASEH1P2	-2.00508	-2.31501	-4.94318	7.09166e-06	0.000584185	3.64859
CTD-2281E23.1	-3.29321	-0.525982	-4.93761	7.23503e-06	0.000594431	3.55798
FSD2	-1.88447	2.37504	-4.93021	7.42969e-06	0.000608826	3.40106
CKMT1A	2.99502	-0.22005	4.92836	7.47913e-06	0.000611277	3.60047
RP11-155D18.13	-1.96567	-0.0297227	-4.92682	7.5204e-06	0.00061305	3.52625
CTB-49A3.4	-2.76359	-1.87617	-4.92434	7.58767e-06	0.000616927	3.57015
MTND2P32	-2.06495	-0.584706	-4.92026	7.69945e-06	0.000624066	3.52733
HAO2-IT1	-2.34453	-3.13548	-4.91919	7.72904e-06	0.000624066	3.57128
ERMARD	-0.948852	4.2434	-4.91897	7.73528e-06	0.000624066	3.29554
RIMBP2	-3.60858	4.75922	-4.91685	7.79406e-06	0.000626841	3.2301
ATP2B3	-2.99982	-0.0230687	-4.91629	7.80973e-06	0.000626841	3.46761
HMGB3P32	-2.71032	1.12078	-4.91278	7.90855e-06	0.000633149	3.38923
TMCC3	-1.13822	5.29188	-4.91028	7.9799e-06	0.000637232	3.22459
MTND1P6	-2.01489	-0.150246	-4.90452	8.14597e-06	0.000647224	3.45614
EGFL6	-2.96488	-0.568994	-4.90451	8.14639e-06	0.000647224	3.45629
DENND2A	-1.49894	4.45916	-4.90062	8.26073e-06	0.000654648	3.20765
TLL1	-1.96176	4.77644	-4.89902	8.30796e-06	0.000655243	3.18762
TGM5	-4.64488	1.49488	-4.89847	8.3243e-06	0.000655243	3.28536
EPHA5-AS1	-3.60999	0.555071	-4.89825	8.33104e-06	0.000655243	3.35027
MMP17	-2.27801	2.40693	-4.87917	8.91919e-06	0.000699743	3.21979
RP11-117L5.1	-3.57312	2.51096	-4.87198	9.15137e-06	0.000716163	3.15743
RP5-1178H5.2	-2.31628	-2.25173	-4.86806	9.2803e-06	0.000724442	3.3946
MPPED1	-2.41544	-2.63479	-4.8635	9.43274e-06	0.000733912	3.38378
TMEM132E	-2.36183	4.73014	-4.86303	9.4485e-06	0.000733912	3.05807
RP11-445O3.2	-2.24569	-3.52514	-4.84757	9.98433e-06	0.000773612	3.33418
KCNC1	-1.16932	2.43449	-4.84656	1.00204e-05	0.000774492	3.13443
VCAM1	-2.3646	7.29392	-4.84131	1.02096e-05	0.000787172	2.93178
JARID2	-0.9988	5.40004	-4.83499	1.04425e-05	0.000803148	2.96177
AC019185.2	-1.86526	-3.45925	-4.82713	1.07387e-05	0.000823907	3.26653
CTD-2001J20.1	-2.64716	-1.88862	-4.82141	1.09596e-05	0.000838799	3.22753
HABP4	-1.06805	5.0962	-4.81932	1.10416e-05	0.000843016	2.91571
AC010890.1	-1.76526	-2.00257	-4.81769	1.11056e-05	0.000844278	3.22866
RP3-366N23.4	-2.21958	-2.49025	-4.81753	1.11121e-05	0.000844278	3.23122
KCNK1	1.84353	2.85034	4.81401	1.1252e-05	0.000851145	3.11892
SMAD9	-1.18693	5.38365	-4.81389	1.12569e-05	0.000851145	2.8868
BNC2	1.50098	5.2679	4.80988	1.14184e-05	0.000861281	2.94443
SLC37A1	1.42088	3.97163	4.8034	1.16846e-05	0.000879241	2.9944
TSPAN18	-1.53493	5.86883	-4.80242	1.17255e-05	0.000880197	2.83165
AC091729.8	-2.16513	-1.2875	-4.80078	1.17941e-05	0.000882621	3.15226
NKX1-2	-2.21069	-3.34401	-4.8003	1.18141e-05	0.000882621	3.17981
LRCH2	1.91622	2.57526	4.7985	1.18902e-05	0.000886185	3.08574
AC004947.2	-2.4457	-1.21682	-4.79562	1.20122e-05	0.000893152	3.12621
CHST13	-2.20912	2.84563	-4.79185	1.21744e-05	0.00090307	2.89227
SLITRK5	-2.64492	2.98917	-4.78521	1.24647e-05	0.000921405	2.85503
RP4-704D23.1	-1.87466	0.899697	-4.78485	1.24805e-05	0.000921405	2.99977
RP1-159G19.1	-2.46173	-3.49215	-4.77947	1.27213e-05	0.000936787	3.1118
HAO2	-3.62707	2.30846	-4.77886	1.27487e-05	0.000936787	2.85094
RP11-330C7.3	-1.22938	1.36207	-4.7699	1.31605e-05	0.000964785	2.94151
MGAT5	-1.09313	6.85552	-4.75834	1.37107e-05	0.00100277	2.6655
CNNM3	-0.749001	5.86206	-4.75458	1.38946e-05	0.00101385	2.67642
TRPA1	-1.37322	3.45469	-4.74685	1.42804e-05	0.00103958	2.73085
RP4-809F4.1	-1.24888	-0.31222	-4.74438	1.44055e-05	0.00104626	2.94447
SYS1-DBNDD2	-2.2792	-2.2126	-4.73748	1.47616e-05	0.00106963	2.96166
TNK2-AS1	-1.27522	1.1553	-4.73586	1.48461e-05	0.00107328	2.83204
CSTF1	-0.794046	4.23909	-4.73379	1.49554e-05	0.0010769	2.66165
RTN4RL2	-1.95368	3.70335	-4.73361	1.49651e-05	0.0010769	2.66082
AC004754.3	-2.20549	-0.617864	-4.72986	1.51649e-05	0.00108878	2.88638
TEPP	-2.27012	-0.491846	-4.72848	1.52388e-05	0.00109158	2.87424
RP11-27M9.1	-1.96733	-3.50869	-4.72392	1.54862e-05	0.00110677	2.93087
C10orf128	-1.63685	4.19346	-4.71986	1.571e-05	0.0011202	2.59949
KRTAP10-1	-2.16324	-3.19357	-4.71847	1.57875e-05	0.00112317	2.91258
DTNB	-0.593236	4.14224	-4.71683	1.58791e-05	0.00112626	2.6114
RABGAP1L	-0.946107	6.34236	-4.71641	1.59029e-05	0.00112626	2.53517
RP11-11N9.4	-2.22532	1.47741	-4.71145	1.61837e-05	0.00114357	2.70483
FTOP1	-1.4893	1.89812	-4.70811	1.63755e-05	0.00115319	2.68996
HHEX	-1.52679	2.72891	-4.7078	1.63936e-05	0.00115319	2.63864
JAKMIP1	-2.15589	-0.373539	-4.70596	1.65e-05	0.00115774	2.79463
BCAN	-1.95983	0.688009	-4.70541	1.65322e-05	0.00115774	2.74391
RABGAP1L-IT1	-1.22324	-0.352681	-4.70323	1.66602e-05	0.00116409	2.81109
RP11-97F8.1	-2.1018	-2.71172	-4.69451	1.718e-05	0.00119749	2.83094
THEMIS3P	-2.91666	-2.28701	-4.69394	1.72147e-05	0.00119749	2.81045
RP11-172H24.4	-1.81594	0.172273	-4.69302	1.72705e-05	0.00119844	2.73528
GCKR	-2.85166	-0.789945	-4.69246	1.73049e-05	0.00119844	2.75585
WIPI2	-0.717281	6.58788	-4.69063	1.74168e-05	0.00120159	2.44376
USP6NL	-0.529543	5.36188	-4.6901	1.74491e-05	0.00120159	2.47508
RP11-449P15.2	-1.09907	6.40084	-4.68984	1.74655e-05	0.00120159	2.43899
TNP1	-1.93641	-3.65472	-4.68647	1.7674e-05	0.00121326	2.8096
LPAR1	1.41623	3.93834	4.68518	1.77542e-05	0.0012161	2.59745
ZNF185	-1.73229	3.87726	-4.67829	1.81905e-05	0.00124327	2.47247
DR1	-0.891649	6.50322	-4.67425	1.84508e-05	0.00125831	2.38713
CTD-2194A8.2	-2.5331	0.8156	-4.6733	1.85127e-05	0.00125979	2.5973
PPP2R5D	-0.82436	4.78784	-4.671	1.86633e-05	0.00126728	2.4278
IKBKE	-1.2038	3.64944	-4.66869	1.88157e-05	0.00127486	2.46472
IL20RA	-2.23664	1.38145	-4.66649	1.89616e-05	0.00128198	2.55437
ACTR3B	-0.885935	3.53121	-4.66303	1.91937e-05	0.00129487	2.45732
NRP2	-1.45775	6.74834	-4.66015	1.93891e-05	0.00130524	2.32841
COL24A1	-2.71919	2.59484	-4.65583	1.96862e-05	0.0013224	2.43311
RNU1-70P	-2.00951	-3.19463	-4.64933	2.01408e-05	0.00135003	2.68931
DOCK5	1.0322	5.55825	4.64771	2.02553e-05	0.00135481	2.36463
GDNF-AS1	-2.45912	2.24742	-4.64698	2.03077e-05	0.00135542	2.42953
RP11-50C13.2	-1.81324	0.710136	-4.64138	2.07105e-05	0.00137936	2.53108
SLC14A2	-1.79663	0.240287	-4.62874	2.165e-05	0.00143627	2.51312
RP11-657O9.1	-1.85892	0.468443	-4.62865	2.16566e-05	0.00143627	2.50236
RBP4	-3.3112	4.3261	-4.62409	2.20059e-05	0.00145634	2.24515
SLC7A11-AS1	-2.03066	0.0301216	-4.61644	2.26039e-05	0.00149157	2.4799
RAB19	-1.7839	0.970448	-4.61606	2.26335e-05	0.00149157	2.43165
FBXO32	1.60883	6.53454	4.61178	2.29754e-05	0.00151092	2.22274
FAM78B	1.18649	2.10738	4.6082	2.32653e-05	0.00152678	2.44643
C16orf89	-2.20627	3.64709	-4.5971	2.41866e-05	0.00158265	2.19958
ST8SIA2	-2.38732	-1.52305	-4.59673	2.42178e-05	0.00158265	2.4799
FAM151B	-0.996254	1.66358	-4.59446	2.44108e-05	0.00159001	2.34581
AC011298.2	-1.98244	-2.77486	-4.59422	2.44319e-05	0.00159001	2.50797
LINGO1-AS1	-2.74776	-1.81572	-4.59231	2.45955e-05	0.00159733	2.46411
GLP1R	-2.23777	0.152027	-4.58805	2.4964e-05	0.00161791	2.37186
MAML2	-0.707602	6.99255	-4.58605	2.51392e-05	0.0016259	2.07999
AP000462.1	-1.35296	0.680602	-4.57853	2.58083e-05	0.00166573	2.33749
AC124944.3	-2.31357	-2.06981	-4.57039	2.65526e-05	0.0017094	2.40605
SLC19A1	-1.24464	5.82375	-4.56994	2.65941e-05	0.0017094	2.04538
STAT6	0.831317	7.16296	4.56342	2.72061e-05	0.00174515	2.02458
LINC00887	-2.06757	2.46333	-4.56274	2.72706e-05	0.00174571	2.13979
CNDP1	-2.89614	0.321947	-4.56205	2.73361e-05	0.00174633	2.25045
PVRL1	-1.17445	4.77045	-4.55515	2.80019e-05	0.00178522	2.02771
TBX1	-2.03424	1.40325	-4.55205	2.83058e-05	0.00180093	2.17266
LINC01267	-2.66312	-1.64039	-4.54711	2.87972e-05	0.00182847	2.31603
DKKL1P1	-2.62337	-3.39154	-4.53313	3.02334e-05	0.00191578	2.31336
STXBP6	-1.7693	1.91583	-4.53138	3.0418e-05	0.00192358	2.08298
AC104297.1	-1.97145	-2.84969	-4.5266	3.09272e-05	0.00195184	2.29269
RP11-586D19.1	-2.28237	-2.1961	-4.52303	3.13131e-05	0.00197222	2.26132
AC073109.2	1.77247	2.32032	4.52209	3.14159e-05	0.00197472	2.17061
RP11-447H19.3	-1.71188	-1.02521	-4.51717	3.1958e-05	0.00200166	2.21578
SIX4	1.35436	2.0692	4.51704	3.19723e-05	0.00200166	2.14686
SYT9	-1.31436	2.7786	-4.51634	3.20503e-05	0.00200253	1.99292
SOHLH1	-2.52152	-2.89574	-4.51531	3.21642e-05	0.00200565	2.25008
GRIK4	-2.70001	0.669196	-4.51388	3.23253e-05	0.00201169	2.07813
AF067845.1	-2.93949	-1.51768	-4.50846	3.29389e-05	0.0020458	2.17658
SNRPCP17	-2.9122	-2.23514	-4.50738	3.30622e-05	0.00204599	2.18888
POU3F1	-2.25267	-0.339993	-4.50729	3.30726e-05	0.00204599	2.13783
PVT1	-1.16562	4.35943	-4.50617	3.32022e-05	0.00204996	1.87645
ACOXL	-1.78002	0.783898	-4.50459	3.3384e-05	0.00205713	2.07142
SLIT1	-2.28114	1.33296	-4.50218	3.36644e-05	0.00207033	2.0089
ANTXRL	-2.98143	-1.11496	-4.50122	3.37769e-05	0.00207317	2.13537
AC005518.2	-2.22508	-3.19809	-4.49765	3.41978e-05	0.0020949	2.20174
AP000439.3	-1.91265	-2.87009	-4.49663	3.43189e-05	0.00209821	2.19762
RP13-39P12.2	-1.1255	0.874292	-4.48799	3.53615e-05	0.00215682	2.03999
CTD-2290C23.2	-2.02753	-1.53793	-4.48756	3.54152e-05	0.00215682	2.13172
FAM151A	-2.32041	3.2628	-4.48608	3.55972e-05	0.00216369	1.84486
GAPDHP29	-2.29964	0.382777	-4.48531	3.56921e-05	0.00216525	2.01801
RNU4-25P	-1.57925	-0.87289	-4.48368	3.58946e-05	0.00217333	2.10164
LRRC3	-1.42982	2.82238	-4.47574	3.68947e-05	0.00222957	1.85479
MYOZ3	-1.70344	1.41123	-4.47444	3.70609e-05	0.00223529	1.93787
PROC	-1.8706	2.15863	-4.47324	3.72149e-05	0.00224027	1.87794
FAM173B	-0.816717	3.98068	-4.47201	3.73738e-05	0.00224551	1.79622
RPL5P5	-1.37767	-1.18161	-4.47118	3.74817e-05	0.00224768	2.08032
EEPD1	-1.27296	4.24828	-4.46888	3.77799e-05	0.00226123	1.76556
RP5-983L19.2	-2.25737	-3.04391	-4.4681	3.78821e-05	0.00226302	2.1044
FLRT1	-1.29298	3.73138	-4.46731	3.79863e-05	0.00226492	1.77964
SPSB4	-2.43639	0.519299	-4.46627	3.81229e-05	0.00226874	1.94465
TGFBRAP1	-0.660986	5.62129	-4.46484	3.8312e-05	0.00227567	1.71134
RP5-1092A11.5	-2.66598	0.149885	-4.46252	3.86211e-05	0.00228969	1.94923
ABCG8	-1.41165	0.62875	-4.45763	3.92795e-05	0.00232432	1.93368
ACOT12	-2.12385	1.04715	-4.45591	3.95134e-05	0.00233067	1.88578
RP11-480A16.1	-1.27695	5.42922	-4.45574	3.95356e-05	0.00233067	1.67587
TSPEAR-AS2	-2.17474	0.311627	-4.4508	4.02161e-05	0.00236633	1.90992
BRINP2	-2.21753	2.91485	-4.45026	4.0292e-05	0.00236634	1.74474
HEY2	1.36423	2.96612	4.44785	4.06287e-05	0.00238165	1.87542
KRTAP10-7	-1.80346	-3.59524	-4.44457	4.10909e-05	0.00240424	2.03836
FBXO10	-0.729619	4.81024	-4.43201	4.29097e-05	0.00250598	1.6284
CYP1D1P	-2.07347	-1.70044	-4.42996	4.32145e-05	0.00251908	1.94977
ZNF488	-1.79702	0.413113	-4.42908	4.33453e-05	0.00252201	1.8516
SAMD5	-1.16214	5.37991	-4.42531	4.39117e-05	0.00254695	1.57475
NEBL-AS1	-1.9566	-2.1395	-4.42515	4.39368e-05	0.00254695	1.95298
SWT1	-0.998833	3.73651	-4.42116	4.45447e-05	0.00257742	1.63889
UGT8	-1.47556	4.43294	-4.41987	4.47426e-05	0.00258409	1.58809
DOK5	2.54949	2.10232	4.41579	4.53757e-05	0.00261583	1.86779
VWA5B1	-2.51881	1.5265	-4.41496	4.55054e-05	0.00261849	1.69556
HMX1	-2.00299	-2.98687	-4.41359	4.57201e-05	0.00262601	1.93425
CPEB3	0.719176	4.80703	4.41042	4.62227e-05	0.00265002	1.60615
RP11-21A7A.4	-1.68115	-0.609912	-4.40478	4.71274e-05	0.00269695	1.83271
RP11-567J20.2	-1.57651	-1.40119	-4.40071	4.77918e-05	0.00272997	1.85778
RP11-179H18.5	-1.77529	-3.55416	-4.3978	4.82714e-05	0.00275235	1.89133
RP11-402G3.6	-2.10302	-3.44729	-4.39701	4.84027e-05	0.00275482	1.88705
ASIP	-2.32044	0.169376	-4.39219	4.92105e-05	0.00279571	1.73112
AC034187.2	-1.81685	-3.254	-4.38804	4.99176e-05	0.00283074	1.85859
TRPM4	1.1802	5.31832	4.38707	5.00841e-05	0.00283505	1.51347
SLCO1A2	-2.80842	-0.339203	-4.38602	5.02648e-05	0.00284014	1.72559
GPR114	-1.88448	4.36456	-4.38374	5.06594e-05	0.00285728	1.46234
LINC00244	-1.65528	-1.72328	-4.38138	5.10719e-05	0.00287537	1.80544
LINC01043	-1.65904	-3.80576	-4.38014	5.12887e-05	0.00288239	1.83734
RANP9	-1.77281	-3.42091	-4.37839	5.15984e-05	0.0028946	1.82971
CTD-2589H19.6	-1.049	0.708168	-4.3767	5.1898e-05	0.00290619	1.68728
LIPC	-2.17236	4.25997	-4.37241	5.26667e-05	0.00294397	1.42552
CMIP	-0.875223	7.50329	-4.37147	5.28377e-05	0.00294638	1.35552
RP11-1109M24.5	-2.68904	-3.3699	-4.37113	5.2898e-05	0.00294638	1.79792
FAM69C	-2.25057	-1.15397	-4.37016	5.30742e-05	0.00295094	1.73428
RUFY4	-1.76442	-0.341059	-4.36196	5.45867e-05	0.00302966	1.67688
RP11-389J22.1	-2.46437	-2.81442	-4.36048	5.48636e-05	0.00303665	1.75484
RP11-120I21.2	-2.51593	-2.95701	-4.36026	5.49066e-05	0.00303665	1.75772
LINC00698	-2.90623	-2.84157	-4.35837	5.52619e-05	0.00305091	1.743
RP11-384P7.7	-1.61062	-0.360597	-4.35302	5.62825e-05	0.00310178	1.65349
RUNDC3A	2.26078	0.956343	4.34756	5.73436e-05	0.00315269	1.69148
AC012501.2	-2.04084	-2.47347	-4.34724	5.74078e-05	0.00315269	1.71235
FABP3	2.25272	3.68264	4.34382	5.80821e-05	0.00318414	1.5282
AGT	-2.01031	4.79252	-4.34229	5.83878e-05	0.0031953	1.31106
RALYL	-2.67	1.55795	-4.34095	5.86562e-05	0.00320439	1.4518
CYP2C9	-2.59105	1.3302	-4.33938	5.89698e-05	0.00321591	1.46289
FAM86B1	-1.43002	4.08106	-4.33738	5.93759e-05	0.00323243	1.32286
2021-09-03	-3.09225	3.66403	-4.33435	5.99939e-05	0.00325531	1.30903
SLC16A13	1.21798	2.10513	4.33401	6.00626e-05	0.00325531	1.55323
DNAH2	-2.33385	1.23567	-4.33379	6.01083e-05	0.00325531	1.46138
HAUS6P2	-2.82695	-3.05787	-4.32971	6.09505e-05	0.00329522	1.65692
RP4-529N6.1	-2.37697	-2.18817	-4.32813	6.128e-05	0.00330733	1.63646
RP11-115P21.1	-1.21962	-0.44897	-4.327	6.15169e-05	0.0033144	1.58854
LRP4	-1.29209	4.24128	-4.3234	6.22773e-05	0.0033496	1.28073
RP11-92B11.3	-1.50944	-1.09024	-4.31796	6.34436e-05	0.00340647	1.57961
RP11-116O18.1	-2.12292	-1.38063	-4.31396	6.43155e-05	0.00344738	1.56869
AL121578.7	-2.03055	-2.93989	-4.31128	6.49062e-05	0.00347309	1.61001
CTD-2377D24.4	-2.92565	-2.63048	-4.30818	6.55948e-05	0.00350395	1.57161
AC018634.9	-1.86558	-2.34335	-4.30554	6.61871e-05	0.00352957	1.57972
RP1-92C4.2	-1.59317	-3.98969	-4.3039	6.65574e-05	0.00354328	1.60096
TCEB3C	2.26595	4.28936	4.30268	6.68346e-05	0.00355199	1.35907
LYRM4	-0.599105	4.08515	-4.29374	6.88993e-05	0.00365552	1.20491
LINC00426	-1.83214	1.17872	-4.29115	6.95103e-05	0.00367188	1.35065
RP11-400D2.2	-1.79156	-3.84012	-4.29107	6.95286e-05	0.00367188	1.55998
ODC1	-0.925092	5.93762	-4.29094	6.95597e-05	0.00367188	1.12412
ZNF536	-2.48298	0.153449	-4.29005	6.97698e-05	0.00367678	1.39039
MAP1B	1.21865	7.72998	4.28907	7.00039e-05	0.00367804	1.11044
IRX2	-2.22162	3.05351	-4.28896	7.00288e-05	0.00367804	1.20502
OR4F13P	-2.47386	-1.07657	-4.28322	7.14084e-05	0.00374422	1.44545
CA11	1.56389	2.44323	4.27999	7.21969e-05	0.00377499	1.37458
OPRL1	-1.05456	1.65988	-4.27983	7.22365e-05	0.00377499	1.31325
ALOX12P2	1.51189	2.60384	4.27676	7.29945e-05	0.00380824	1.34273
C5orf38	-2.08266	0.957802	-4.2718	7.4232e-05	0.00385582	1.28998
EPHA5	-3.93095	3.11394	-4.27147	7.43176e-05	0.00385582	1.11634
STAB1	1.44677	7.71394	4.2714	7.43334e-05	0.00385582	1.05748
PEMT	-1.14499	3.0262	-4.27114	7.43991e-05	0.00385582	1.18784
RP11-151A6.4	-1.89683	3.07505	-4.26982	7.47348e-05	0.00386681	1.14599
RP11-70D24.1	-1.89593	-1.11135	-4.26844	7.50834e-05	0.00387844	1.41519
ADAP2	0.889777	4.8847	4.26693	7.54693e-05	0.00389031	1.12987
NPPC	-1.97137	-3.06187	-4.26657	7.55616e-05	0.00389031	1.4757
PPM1H	-1.0619	6.58506	-4.26564	7.58018e-05	0.00389626	1.02566
FAM20C	-1.21486	6.38594	-4.26143	7.68904e-05	0.00394574	1.01235
MYB	-1.45774	-0.549444	-4.25742	7.79434e-05	0.00399323	1.35996
TTC38	-0.976672	5.58753	-4.254	7.88524e-05	0.00402682	1.01427
UROC1	-1.81205	-2.59005	-4.25399	7.88564e-05	0.00402682	1.42712
RP11-351I21.11	-1.47036	2.31731	-4.24739	8.06376e-05	0.00411107	1.13646
RP11-38M8.1	-1.74411	-0.115224	-4.24689	8.07751e-05	0.00411139	1.29722
PRELID2	-0.894493	2.16438	-4.2463	8.09359e-05	0.00411289	1.17548
KATNAL2	1.31988	3.37714	4.24262	8.19518e-05	0.00415776	1.17989
NOS1	-3.33305	3.42504	-4.23735	8.34245e-05	0.00422511	1.00379
MAG	-2.41745	-0.1703	-4.23691	8.35492e-05	0.00422511	1.24824
WSCD1	-1.16036	4.70308	-4.2354	8.39756e-05	0.00423489	0.978946
AC006145.4	1.52966	0.504575	4.23521	8.40316e-05	0.00423489	1.33174
TSPY26P	-0.902039	3.86288	-4.2348	8.41486e-05	0.00423489	1.01885
ONECUT1	-2.0223	-0.517022	-4.23383	8.44239e-05	0.00424193	1.26897
SEPW1	0.670253	5.74549	4.23082	8.52878e-05	0.00427847	0.967759
ILDR2	1.87022	4.26543	4.22668	8.64881e-05	0.00433117	1.09011
TMEM75	-1.23019	3.14782	-4.22625	8.6615e-05	0.00433117	1.02898
RGS22	-1.64002	0.0563168	-4.22502	8.69742e-05	0.00434219	1.2194
RP11-62C7.2	-2.10655	-2.6906	-4.221	8.81638e-05	0.00439199	1.32193
COTL1	-0.853552	6.7049	-4.22062	8.82791e-05	0.00439199	0.879356
PPM1L	1.02311	5.19431	4.22016	8.84164e-05	0.00439199	0.965378
ELSPBP1	-2.85546	-0.911495	-4.21977	8.85328e-05	0.00439199	1.22864
CTB-26E19.1	-1.63669	-0.400862	-4.21821	8.89991e-05	0.00440813	1.22599
U91328.2	-1.62857	-2.67858	-4.21209	9.08577e-05	0.00449308	1.30291
TAF4B	-0.796286	3.43511	-4.21029	9.14098e-05	0.00451325	0.971685
GDNF	-2.44165	2.39263	-4.20906	9.17904e-05	0.00451719	0.975626
RP11-159H10.4	-1.66124	-3.30174	-4.20849	9.1968e-05	0.00451719	1.30186
RP11-357H14.17	2.34937	1.19734	4.20828	9.20314e-05	0.00451719	1.24917
SGOL1P1	-1.86417	-3.03914	-4.20817	9.20667e-05	0.00451719	1.29479
SMIM3	-0.980031	3.88346	-4.20692	9.24543e-05	0.0045291	0.934678
E2F3	0.897985	4.14706	4.2045	9.32128e-05	0.00455912	0.974051
SLC25A35	0.852363	3.22125	4.20383	9.34221e-05	0.00456097	1.0432
RP11-38L15.8	-1.91046	-1.93371	-4.20345	9.35419e-05	0.00456097	1.24593
CALM1P2	-1.97257	-3.03723	-4.2023	9.39074e-05	0.00457167	1.27645
RPL21P109	-1.73552	-0.926003	-4.20065	9.44309e-05	0.00459002	1.19798
AXL	0.937396	5.78006	4.19949	9.47987e-05	0.00460075	0.873899
AC068057.1	-1.64543	-3.61202	-4.19853	9.51068e-05	0.00460856	1.27426
RP11-347E10.1	-1.83176	-3.03084	-4.19658	9.57327e-05	0.00463172	1.26008
AC098826.5	-1.91416	-2.97894	-4.19345	9.67491e-05	0.00467367	1.24789
OR1N2	-1.76822	-3.12842	-4.1925	9.7058e-05	0.00468137	1.24996
RP11-261P13.5	-1.93551	-2.07266	-4.19014	9.78318e-05	0.00471143	1.20685
RP11-844P9.2	-2.02799	-2.58592	-4.18863	9.83301e-05	0.00472815	1.22133
EML2	0.787906	4.64262	4.18637	9.90803e-05	0.00475692	0.884867
IQCJ	-1.79542	-1.06517	-4.18215	0.000100498	0.00481762	1.14462
RP11-408O19.5	-1.33439	-0.857685	-4.1813	0.000100787	0.0048222	1.14504
BCO1	-1.71899	3.28551	-4.18096	0.000100902	0.0048222	0.862871
BCLAF1P1	-1.70984	-1.19775	-4.17428	0.000103192	0.00492411	1.12459
RP11-434E6.4	1.74781	1.12767	4.17291	0.00010367	0.00493493	1.11579
LRRFIP1	0.597865	6.9175	4.17272	0.000103734	0.00493493	0.742975
OR4F28P	-2.23667	-1.55422	-4.17164	0.000104111	0.00494533	1.12408
THSD7A	1.40488	6.25713	4.16965	0.000104811	0.00497106	0.772976
DLGAP2-AS1	-2.0851	-2.82286	-4.16819	0.000105324	0.00498781	1.16252
SMOC1	-1.8326	2.43816	-4.16722	0.00010567	0.00499666	0.855483
RP11-680F8.1	-1.77772	2.57727	-4.16369	0.000106928	0.00504852	0.839444
RARG	1.07178	4.28308	4.16296	0.00010719	0.00505325	0.845399
DPP6	2.38841	4.89087	4.16041	0.000108113	0.00508071	0.86312
RUNDC3A-AS1	2.33363	-0.743964	4.16015	0.000108205	0.00508071	1.15158
AC011625.1	-1.95174	-1.94203	-4.16	0.000108259	0.00508071	1.10961
RP11-468I15.1	-1.88944	-3.24224	-4.15937	0.000108491	0.00508399	1.14885
RP11-9N12.2	-2.06669	-1.49055	-4.15808	0.00010896	0.00509834	1.082
RN7SL443P	-1.80855	-2.90145	-4.15536	0.000109961	0.00513746	1.13012
HS6ST1	-1.27728	6.97811	-4.15066	0.000111706	0.00519811	0.643138
SIGLEC15	-1.07189	2.1666	-4.15063	0.000111716	0.00519811	0.858684
RP11-136O12.2	-1.68664	-0.229466	-4.15024	0.000111863	0.00519811	1.00019
LONRF2	1.30611	4.99089	4.15008	0.000111923	0.00519811	0.763023
MAP1LC3C	-1.61993	-0.853207	-4.14516	0.000113782	0.00527663	1.02448
AC108025.2	-1.53862	-3.85276	-4.13847	0.000116362	0.00538214	1.09323
SACS-AS1	-1.43503	-0.239418	-4.13825	0.000116446	0.00538214	0.971395
PPFIA4	-1.86332	5.10615	-4.13793	0.000116573	0.00538214	0.639789
LRAT	-1.93557	1.30033	-4.13397	0.000118127	0.00544586	0.832609
TNFAIP2	1.24763	7.56448	4.13312	0.000118464	0.00545306	0.609333
MKRN5P	1.26281	2.2249	4.13269	0.000118632	0.00545306	0.904805
RP11-363E6.4	-1.61652	-1.98081	-4.13222	0.000118819	0.00545367	1.03391
RP11-360O19.5	-1.13661	0.600086	-4.13139	0.000119153	0.00546095	0.906646
PXYLP1	-0.815639	4.21214	-4.12934	0.00011997	0.00549036	0.668868
EEF1A2	-4.11918	5.22551	-4.12718	0.000120842	0.00552222	0.576871
RTFDC1	-0.955133	5.51839	-4.12536	0.000121577	0.0055477	0.605154
SLC45A2	-2.90283	3.11504	-4.12099	0.000123365	0.00562009	0.651497
NEFL	4.5588	4.19733	4.12061	0.000123522	0.00562009	0.889156
RP11-408B11.2	-1.9087	-3.57006	-4.11779	0.000124694	0.0056642	1.02626
RP11-132A1.4	-1.47117	-0.544927	-4.1174	0.000124854	0.0056642	0.926385
MTND5P1	-1.6319	-1.4812	-4.11202	0.000127116	0.00575331	0.95
PELI1	0.589064	4.79568	4.11183	0.000127198	0.00575331	0.63054
BMP6	-1.40746	3.71752	-4.11143	0.000127369	0.00575331	0.61908
RARRES2P3	-1.80926	-3.3329	-4.1089	0.000128449	0.00579372	0.997306
ZNF34	-0.513966	2.35393	-4.10791	0.000128873	0.00580447	0.733978
SMAD3	-0.682537	6.68188	-4.10622	0.000129601	0.00582886	0.513524
RP11-84O12.3	-1.90458	-2.42854	-4.10309	0.000130962	0.00588162	0.953278
RP11-408P14.1	-1.03262	1.882	-4.10042	0.000132134	0.00592578	0.724191
YIPF7	-1.80568	-2.60355	-4.09969	0.000132457	0.00593174	0.949562
RP11-742D12.2	1.97232	0.135468	4.09781	0.000133289	0.00596049	0.939066
ANKRD33B-AS1	-1.63389	-0.943757	-4.09611	0.000134043	0.00598567	0.874301
HSD3B2	-1.83856	-1.46473	-4.09304	0.000135422	0.00603864	0.88223
RN7SL50P	-2.23691	-3.01193	-4.09159	0.000136079	0.00605931	0.930184
AP000695.4	-1.83188	0.46451	-4.08841	0.000137525	0.00611498	0.75015
CNTN3	-1.56466	5.46371	-4.08683	0.000138253	0.00613865	0.472915
FMNL3	0.836754	7.07479	4.08383	0.000139639	0.00618922	0.457032
RP11-68L18.2	-1.88444	-3.09803	-4.08319	0.000139935	0.00618922	0.912826
RP11-528M18.2	-2.05701	0.430738	-4.08309	0.000139986	0.00618922	0.73269
COL19A1	-1.66986	1.6688	-4.07925	0.000141785	0.0062578	0.647614
RMST	-2.72882	4.11409	-4.07893	0.000141937	0.0062578	0.476872
C8G	-1.50021	-0.880647	-4.07842	0.000142177	0.00625959	0.822532
RP11-640N11.2	-1.98833	-1.23507	-4.07606	0.000143297	0.00630002	0.816229
CXADR	2.06152	3.40356	4.07488	0.000143857	0.00631283	0.68294
NMNAT3	-0.698594	4.34221	-4.0746	0.000143991	0.00631283	0.488694
LINC00298	-2.1323	-2.08964	-4.07418	0.000144195	0.00631294	0.845645
RAB27A	-1.60878	4.68711	-4.0708	0.000145823	0.00637337	0.444625
EXOC3-AS1	-1.11413	2.00699	-4.07047	0.000145983	0.00637337	0.607253
AP001046.5	-1.68442	0.381899	-4.06807	0.000147149	0.00641531	0.703651
RP11-52B19.1	-1.95763	-1.64544	-4.06544	0.000148443	0.00646273	0.80604
TIGD3	-1.78625	-1.34488	-4.06064	0.000150826	0.00655739	0.777717
ASB9	-1.4708	2.4797	-4.05985	0.000151222	0.00656546	0.529924
LRRC75A	-0.721397	3.60265	-4.057	0.000152657	0.00661859	0.470932
RBMXL3	1.86643	-0.346642	4.05444	0.000153963	0.00666597	0.818851
C18orf63	-1.90896	-2.5499	-4.05347	0.000154456	0.00667654	0.806033
ACMSD	-2.09271	3.64726	-4.05313	0.000154633	0.00667654	0.424806
CTD-2377D24.6	1.68008	1.11141	4.05077	0.000155845	0.00671956	0.735339
KMO	-1.61359	2.55261	-4.04937	0.00015657	0.00674154	0.487844
KRBA1	-1.04394	4.56518	-4.04867	0.000156934	0.00674794	0.389189
RP11-119D9.1	-1.60278	2.63298	-4.04799	0.000157291	0.00675052	0.471857
GRM4	-2.23992	-1.04011	-4.04773	0.000157425	0.00675052	0.713183
RP11-595O22.1	-2.46344	1.82089	-4.04648	0.000158079	0.0067669	0.502273
DEXI	-1.07406	6.71349	-4.04617	0.000158239	0.0067669	0.31708
TUBA8	-1.72715	2.31511	-4.04504	0.000158834	0.00678305	0.493631
RP11-345P4.10	-1.70287	-3.70678	-4.04089	0.00016103	0.00686746	0.796578
RP11-391L3.3	-0.730052	4.72394	-4.03381	0.000164853	0.00702071	0.342972
RP4-682E18.1	-2.09705	-3.01589	-4.0334	0.000165072	0.00702071	0.757362
IGF2BP1	-2.01007	2.079	-4.03155	0.000166089	0.00705441	0.449346
UPK3A	-2.36774	-2.01991	-4.03088	0.000166457	0.00706044	0.708539
SCCPDH	-1.05147	5.1185	-4.0304	0.000166722	0.0070621	0.310493
PYROXD2	-0.938433	3.92425	-4.02901	0.000167487	0.00708492	0.363925
SRC	-0.940073	6.03934	-4.02791	0.000168101	0.00710132	0.279598
B3GNT5	0.937261	4.43221	4.02707	0.000168564	0.00711127	0.393668
FARP1	-0.717269	9.13998	-4.02481	0.000169831	0.00715506	0.217212
MYLK4	-1.0726	2.06926	-4.02244	0.000171165	0.00720158	0.465964
SUCNR1	-2.2697	4.2389	-4.01949	0.000172841	0.00726236	0.289866
TEKT4	-1.96616	-2.06036	-4.01795	0.000173721	0.00728954	0.679177
PNMA2	1.57301	3.38449	4.01672	0.000174432	0.00729956	0.477393
NAGK	-0.53342	6.6389	-4.01651	0.000174553	0.00729956	0.233731
RP11-396M11.1	-2.23928	-2.63202	-4.01606	0.000174809	0.00729956	0.688094
ALDH1A3	-1.88036	5.24572	-4.01592	0.000174893	0.00729956	0.248448
STOX2	-0.715676	5.69725	-4.01431	0.000175825	0.00732567	0.250205
RP11-369C8.1	-2.89762	1.91119	-4.01376	0.000176147	0.00732567	0.37488
NSUN4	-0.583233	5.13409	-4.01333	0.000176395	0.00732567	0.265582
WDPCP	-0.538819	4.5334	-4.01323	0.000176455	0.00732567	0.288798
MFSD6	0.733472	4.91182	4.0123	0.000176996	0.00733224	0.31206
ABCB9	-1.59255	4.72574	-4.01185	0.00017726	0.00733224	0.257942
NOL8P1	-1.52561	-3.78041	-4.01175	0.000177316	0.00733224	0.711398
DLGAP2	-2.23511	2.00128	-4.01093	0.000177794	0.00734234	0.380549
AC005538.3	-2.51931	-0.929354	-4.00747	0.000179836	0.00741686	0.57693
IRX3	1.8309	3.80688	4.00646	0.00018044	0.00743198	0.434033
POMC	-1.81251	-0.657336	-4.00539	0.000181075	0.00744836	0.56907
LINC01304	-1.70575	-3.67585	-4.00391	0.00018196	0.00747492	0.685681
PTDSS1	-0.756475	5.11667	-4.00271	0.000182686	0.00749492	0.234171
SLCO5A1	-1.22588	1.28051	-4.00192	0.000183158	0.00750165	0.452454
AC007381.3	-1.83662	-1.60247	-4.00164	0.000183329	0.00750165	0.610205
RP11-509P12.1	-1.91284	-1.08875	-4.00028	0.000184151	0.00752543	0.577851
RP11-320M2.1	-0.830713	1.06233	-3.99942	0.000184678	0.00753713	0.477495
RP1-266L20.9	-0.82417	1.4075	-3.99557	0.000187032	0.00762326	0.432076
AC067940.1	-1.27089	-1.42579	-3.99287	0.000188702	0.00766719	0.595114
RAB11FIP1P1	0.890634	4.73813	3.99274	0.000188782	0.00766719	0.27325
NDUFAF4P4	-1.18474	-0.394485	-3.99264	0.000188845	0.00766719	0.540065
PABPC1P4	-1.30259	1.41771	-3.99215	0.000189149	0.00766959	0.409338
CTD-2517O10.6	-1.10361	0.474359	-3.98382	0.00019441	0.00787272	0.45683
THBS1	-1.2933	9.87649	-3.98318	0.000194822	0.0078792	0.0786051
RP11-301G19.2	-1.80588	-3.05624	-3.98105	0.000196189	0.00792424	0.606195
C10orf90	-2.70133	-0.643938	-3.9798	0.000196999	0.00794671	0.463705
LCN1	-1.41968	-3.99329	-3.97845	0.000197875	0.00796353	0.614517
DEFB115	-1.55785	-3.93025	-3.97837	0.000197924	0.00796353	0.612613
TCEAL6	-2.24164	-2.7805	-3.97512	0.00020005	0.00803873	0.57145
GPR75	1.00085	2.65739	3.97309	0.000201392	0.00807613	0.366256
MLNR	-1.9855	-1.19081	-3.97293	0.000201497	0.00807613	0.496514
MTSS1	-0.579866	6.61431	-3.97188	0.000202194	0.0080915	0.0938817
MYH15	-1.29388	-0.298152	-3.97157	0.000202397	0.0080915	0.464363
CRIP2	1.21836	5.73316	3.97041	0.000203171	0.00811206	0.158657
TP73	-1.68643	3.50911	-3.96653	0.000205773	0.00820549	0.171517
PEPD	-0.970279	6.17019	-3.96522	0.000206659	0.00823033	0.0797378
RP11-68L18.1	-1.10557	0.222905	-3.9627	0.000208377	0.00828821	0.410177
C1orf115	-1.38698	5.50755	-3.96193	0.000208908	0.00828869	0.0804042
RP11-361D14.2	-1.68309	-0.9942	-3.96191	0.000208919	0.00828869	0.462962
CNTNAP2	-2.04132	1.03032	-3.95722	0.00021216	0.00840565	0.301105
SLC18B1	0.618623	3.80281	3.95687	0.000212404	0.00840565	0.207133
HPS1	-0.755405	6.10655	-3.95621	0.000212858	0.00841301	0.0559106
AC006019.4	2.34921	3.72694	3.95542	0.000213413	0.00842428	0.300471
C4orf46	-0.996922	2.62697	-3.9542	0.000214267	0.00844735	0.21706
IL12A	-1.56139	-2.14411	-3.95206	0.000215775	0.00849611	0.49481
MYO5C	0.946745	4.89391	3.95085	0.000216632	0.00851915	0.136925
CLIP4	-0.782451	6.10499	-3.94503	0.000220805	0.00867233	0.0175807
SLC7A11	-1.82346	2.65963	-3.94431	0.000221322	0.00868177	0.145585
CRACR2A	-0.906302	3.14425	-3.94242	0.000222697	0.00872477	0.146394
MYO1D	0.990155	6.98091	3.93736	0.000226417	0.00885404	0.00302077
HAGLR	1.48245	3.59744	3.93716	0.000226562	0.00885404	0.210623
AC007557.3	-1.72829	-3.39063	-3.93644	0.000227096	0.00886382	0.480541
ZNF275	-0.787721	5.8057	-3.93592	0.000227487	0.00886802	0.000392069
CNRIP1	1.06999	3.13191	3.93483	0.0002283	0.00888864	0.215917
LINC01229	-1.76774	-1.25599	-3.93426	0.000228721	0.008894	0.392016
SPSB1	1.094	5.99345	3.93216	0.0002303	0.00894427	0.021282
CTD-2206N4.4	1.1481	1.16686	3.93024	0.000231749	0.00898132	0.34107
CTA-315H11.2	-2.03336	1.22928	-3.93014	0.000231828	0.00898132	0.183863
RP11-26L20.4	-1.62504	-0.896419	-3.92947	0.000232332	0.00898974	0.363221
CTPS1	-1.04622	5.85263	-3.92803	0.000233432	0.00902114	-0.0303335
RP11-260E18.1	-1.25088	0.194427	-3.92535	0.000235484	0.00908923	0.287978
KCNMB4	1.52383	1.8223	3.92473	0.00023596	0.00909638	0.298613
PITPNM2	0.793913	5.50764	3.92356	0.000236864	0.00911998	0.0124276
NR1I2	-1.15758	-0.323584	-3.92283	0.000237432	0.00913063	0.323654
KB-1552D7.2	-2.08277	1.7521	-3.92245	0.000237726	0.00913074	0.136491
CA2	-1.90359	5.68681	-3.9218	0.00023823	0.00913887	-0.0545349
FREM2-AS1	-1.75077	-2.09102	-3.92096	0.000238881	0.00915262	0.392747
CREB3L1	2.0259	5.2502	3.91932	0.000240166	0.00919061	0.0547151
FBP1	-1.64944	4.74463	-3.91688	0.000242085	0.00925273	-0.0360783
LRRC16B	-1.07571	2.56108	-3.91496	0.00024361	0.00929966	0.0902858
GNAL	-0.796428	4.46954	-3.91451	0.000243962	0.00930177	-0.0192349
GARNL3	-0.664178	4.55495	-3.91075	0.000246972	0.00940508	-0.0304002
RP11-398C13.2	-1.97206	-2.17241	-3.90953	0.000247961	0.00943126	0.35627
MC5R	-2.01546	-3.44929	-3.90738	0.000249705	0.00948607	0.392292
GCNT2	-0.831842	5.341	-3.90599	0.000250834	0.00951741	-0.0817538
FZD5	-0.712267	5.16913	-3.90321	0.00025312	0.00958649	-0.0809639
TNIP3	-2.36264	1.37014	-3.90303	0.000253267	0.00958649	0.0927276
MEFV	1.41596	0.676969	3.90246	0.000253738	0.00959272	0.299831
RP11-301G19.1	-2.08017	-2.61104	-3.9019	0.000254206	0.00959879	0.348562
RP11-158L12.6	-1.67284	-3.35287	-3.89997	0.000255809	0.0096477	0.372702
LINC00635	-1.78356	-2.86751	-3.89754	0.000257842	0.00970318	0.353094
KRT17	-2.31616	2.47164	-3.89747	0.0002579	0.00970318	-0.00816621
C2	1.66854	5.28795	3.89633	0.000258852	0.00972729	-0.0356406
NSDHL	-0.74978	2.57581	-3.89065	0.000263685	0.00989704	0.0349533
RP11-423C15.3	-1.51647	-2.5951	-3.89003	0.000264219	0.00990519	0.327025
TRIM9	1.42587	2.27096	3.8889	0.000265193	0.00992984	0.150456
ARHGEF28	-0.835982	7.25322	-3.88747	0.000266426	0.00996251	-0.184954
LINC01186	-1.72085	-1.76725	-3.88715	0.000266702	0.00996251	0.27928
HNRNPA1P57	-2.38222	-0.562693	-3.88583	0.000267846	0.0099933	0.177281
TRIM14	0.862612	5.4836	3.88541	0.000268212	0.00999345	-0.105177
LINC00963	0.699259	6.07737	3.8851	0.000268488	0.00999345	-0.139402
LOXL1-AS1	-0.756721	2.72647	-3.8835	0.000269882	0.0100334	-0.00770355
CYB561A3	-0.919805	6.00559	-3.88161	0.000271552	0.0100835	-0.178184
ZNF532	0.662815	6.70447	3.87875	0.000274082	0.0101598	-0.176052
GS1-24F4.2	-1.61997	-1.45659	-3.87828	0.000274505	0.0101598	0.23778
TEX41	-1.61816	4.46467	-3.87819	0.000274579	0.0101598	-0.148748
PLA2G15	-1.16617	5.20493	-3.87678	0.000275842	0.0101944	-0.168498
ORAOV1	-0.632901	4.84621	-3.87482	0.000277602	0.0102379	-0.154469
RPL35AP31	-1.53989	0.0525991	-3.87474	0.000277673	0.0102379	0.13662
AC096670.3	-1.94418	-0.755681	-3.87437	0.000278014	0.0102384	0.175323
GBA3	-2.39815	4.00322	-3.87386	0.000278471	0.0102432	-0.158257
ATL1	0.961488	2.07258	3.87183	0.000280311	0.0102893	0.0865429
FAM117B	-0.57777	5.03	-3.87163	0.000280495	0.0102893	-0.167676
SLC7A9	-1.82273	1.93377	-3.87106	0.000281013	0.0102893	-0.0279826
SNX2	-0.798334	5.62333	-3.87103	0.000281039	0.0102893	-0.195945
AC097374.2	-1.88989	-2.53358	-3.86479	0.000286786	0.0104874	0.239599
KRT8P35	-2.3858	-3.02352	-3.86367	0.000287831	0.0105134	0.243564
MAP4K5	0.588389	5.25942	3.86277	0.00028867	0.0105317	-0.172667
FANCC	-0.838608	6.08708	-3.86219	0.000289218	0.0105394	-0.236644
TNKS1BP1	0.896162	6.7524	3.86172	0.000289655	0.0105431	-0.224893
HNRNPLP2	-0.828095	2.23809	-3.86054	0.000290765	0.0105712	-0.0345821
AMMECR1	-0.649865	4.68438	-3.85981	0.000291451	0.0105839	-0.192221
ATP8A2	-1.70274	1.87816	-3.85712	0.000294005	0.0106642	-0.0573493
RBM46	-1.79819	-2.58258	-3.85604	0.000295032	0.0106891	0.216386
LRRN2	1.42355	4.16494	3.85414	0.000296857	0.0107428	-0.106437
ZNF415	0.728949	2.8213	3.852	0.000298914	0.0108047	-0.0313475
KRTAP10-8	-1.8517	-3.22154	-3.85134	0.000299562	0.0108157	0.223578
NEAT1	0.972219	14.0654	3.8502	0.00030067	0.0108373	-0.335106
GYPC	-0.671978	5.20314	-3.84948	0.000301365	0.0108373	-0.245861
RP11-345M22.2	-1.38649	0.703554	-3.84942	0.000301423	0.0108373	0.0185129
HAGH	-0.58464	4.98133	-3.8493	0.000301547	0.0108373	-0.235567
FTCD-AS1	-1.82837	-0.678233	-3.8441	0.000306655	0.0110083	0.0826213
VPS4A	-0.674746	6.82619	-3.84373	0.000307024	0.0110089	-0.311572
PAPD7	-0.510398	5.36386	-3.83993	0.000310816	0.0111144	-0.279406
BTG3	1.6513	2.4028	3.83961	0.00031114	0.0111144	0.00272828
RP11-5N11.5	-1.72507	-2.12056	-3.83948	0.000311274	0.0111144	0.151617
AC007128.1	-1.86043	-3.67641	-3.83914	0.00031162	0.0111144	0.197271
RP11-1C1.4	-2.8023	0.0437711	-3.83902	0.00031174	0.0111144	-0.017809
RHBDF1P1	-1.92266	-1.04131	-3.83837	0.000312394	0.011125	0.0868218
PHYHIPL	-1.81885	4.73366	-3.8351	0.00031571	0.0112303	-0.295239
RN7SKP257	-1.79321	-3.88482	-3.83284	0.000318024	0.0112954	0.181214
GPR155	-0.810162	4.71084	-3.83261	0.000318262	0.0112954	-0.278868
POM121L4P	-1.52274	-3.8518	-3.82916	0.000321823	0.0114088	0.173087
CREBL2	-0.677184	6.31478	-3.82694	0.000324139	0.011478	-0.349916
RP11-484D2.2	-0.904561	-0.262837	-3.82509	0.00032608	0.0115238	0.0322538
PPIP5K1	0.545778	5.22802	3.825	0.000326169	0.0115238	-0.289209
AC024937.6	-1.22875	2.27304	-3.82319	0.000328079	0.0115782	-0.181155
NREP	-0.931538	5.84899	-3.82266	0.00032864	0.0115849	-0.351882
ABO	-1.56412	5.93464	-3.81716	0.00033452	0.0117789	-0.380131
AC007557.2	-1.59841	-3.86271	-3.81563	0.000336172	0.0118238	0.133139
DNASE2	1.01798	3.97885	3.81498	0.000336882	0.0118355	-0.214967
GPR27	1.30305	2.36193	3.80905	0.000343381	0.0120421	-0.10749
CTA-250D10.19	-1.74212	-3.02766	-3.80862	0.000343852	0.0120421	0.0954927
PKLR	-2.35453	2.11043	-3.80856	0.000343918	0.0120421	-0.252067
ASIC4	-1.61438	-0.599522	-3.80611	0.000346646	0.0121176	-0.0311061
KIAA1244	-1.33851	5.38561	-3.80592	0.000346849	0.0121176	-0.396067
DIAPH2	1.02708	4.53528	3.80415	0.000348838	0.0121734	-0.287943
AC007362.3	-1.34177	0.343872	-3.80381	0.000349222	0.0121734	-0.0938252
GRM2	1.15178	0.34176	3.80316	0.00034995	0.0121852	0.0106159
KAT2B	-0.557066	5.25077	-3.80268	0.000350488	0.0121904	-0.389376
AC018641.7	-1.53366	-3.84788	-3.79989	0.000353646	0.0122865	0.0882075
CSRP2BP	-0.502668	3.87786	-3.79671	0.000357284	0.0123992	-0.336722
AC006547.13	-1.05869	3.48441	-3.79439	0.00035996	0.0124782	-0.340037
RP11-367J11.3	-1.03727	0.522662	-3.79394	0.000360472	0.0124821	-0.128431
SLC5A8	-2.70839	3.43028	-3.79351	0.000360979	0.0124859	-0.381287
RP11-486L19.2	-1.79298	-3.34229	-3.78894	0.000366314	0.0126564	0.0452221
RP11-254A24.2	-1.63048	-1.66946	-3.78717	0.000368396	0.0127058	-0.0210399
MAP2	1.62274	4.12777	3.78672	0.000368931	0.0127058	-0.280562
UCP1	-1.50346	-2.76544	-3.78642	0.000369293	0.0127058	0.028439
MLXIPL	-1.785	4.55399	-3.78612	0.000369643	0.0127058	-0.438447
RP11-374F3.5	-1.56886	0.600356	-3.78601	0.000369771	0.0127058	-0.17313
SLC41A1	-0.677738	5.85656	-3.78536	0.000370543	0.012713	-0.461855
DKFZP434A062	-1.5715	-1.8649	-3.78515	0.000370793	0.012713	-0.0151235
FAM86C1	-0.593166	3.00272	-3.78479	0.000371221	0.0127137	-0.323201
CD79B	-1.50116	1.22613	-3.78331	0.000372988	0.0127437	-0.231021
COL23A1	-1.43978	2.78109	-3.78319	0.000373143	0.0127437	-0.351645
RP11-5N11.2	-1.85725	-2.59293	-3.78304	0.000373318	0.0127437	0.00167934
SLC23A2	-0.870883	6.73012	-3.78216	0.00037437	0.0127657	-0.495988
MRVI1-AS1	-1.33757	-1.09405	-3.77914	0.000378019	0.0128761	-0.0668325
GRID1-AS1	-1.92044	-0.587141	-3.77684	0.000380812	0.012956	-0.126141
DUSP6	0.705722	5.48862	3.77653	0.000381192	0.012956	-0.44473
ZNF189	-0.748478	5.19336	-3.77495	0.000383124	0.0130064	-0.473323
HPDL	-1.43528	0.560004	-3.77463	0.000383524	0.0130064	-0.193489
DLG4	1.21286	4.10106	3.7743	0.000383923	0.0130064	-0.342899
TTLL4	-0.652525	5.20859	-3.77235	0.000386329	0.0130738	-0.47864
RP6-24A23.8	-1.51821	-3.75106	-3.77129	0.000387646	0.013102	0.00397786
ERI3	-0.655027	4.94313	-3.77101	0.000388001	0.013102	-0.475687
RN7SL832P	-1.2884	-1.06541	-3.76831	0.000391366	0.0131935	-0.101102
CDPF1	-0.753533	2.65567	-3.76784	0.000391961	0.0131935	-0.343795
RP1-102G20.5	-1.46852	-1.62775	-3.76783	0.000391974	0.0131935	-0.0749682
SPATS2	0.498631	4.3234	3.76734	0.000392579	0.0131997	-0.414857
RP5-854E16.2	-1.63122	-0.917724	-3.76666	0.000393436	0.0132143	-0.123143
TSPEAR-AS1	-1.76459	-0.698433	-3.76556	0.000394827	0.0132468	-0.145898
RP11-141J13.5	-1.42773	-1.74844	-3.76405	0.000396742	0.0132894	-0.0774189
CTD-2595P9.4	-1.17732	-0.0704222	-3.76389	0.000396945	0.0132894	-0.178506
C11orf70	1.44093	-0.212943	3.76332	0.000397662	0.0132897	-0.0649455
CTD-2123J17.2	-1.961	-3.04478	-3.76321	0.000397804	0.0132897	-0.0397255
RP11-44F14.8	-1.49633	-0.78973	-3.76049	0.000401282	0.0133886	-0.146497
RP11-208C17.4	-1.8798	-3.29059	-3.76023	0.000401618	0.0133886	-0.039353
TMEM18	-0.454484	4.44919	-3.75961	0.000402413	0.0134008	-0.47904
NQO2	-0.824599	5.83664	-3.75876	0.000403511	0.0134231	-0.547388
RP11-275E15.3	-1.72764	-3.00923	-3.75842	0.000403954	0.0134235	-0.0491181
FNIP2	1.07336	8.64532	3.75734	0.000405343	0.013425	-0.585324
RP11-45A12.2	-1.58852	-3.31913	-3.7569	0.000405925	0.013425	-0.0448079
ANKRD30BL	-2.49246	1.31235	-3.75653	0.000406406	0.013425	-0.349953
SRPX	-1.80507	2.17715	-3.75631	0.000406691	0.013425	-0.389578
ANK2	-1.15945	8.09019	-3.7563	0.000406693	0.013425	-0.603691
TIMP2	0.812825	8.78376	3.75626	0.000406752	0.013425	-0.595656
SSX4	-1.56487	-3.91591	-3.75607	0.000407	0.013425	-0.0378552
RP11-42F12.1	-1.86848	-1.45866	-3.75473	0.000408747	0.0134684	-0.138678
CXCL1	-2.19334	3.32767	-3.7542	0.000409433	0.0134768	-0.485796
CSF1R	1.05345	6.22012	3.75144	0.000413073	0.0135824	-0.540696
MAFF	1.56496	6.1028	3.75102	0.000413626	0.0135863	-0.525806
ZNF98	2.33179	0.33237	3.75067	0.000414078	0.0135869	-0.098433
WDR5	-0.595644	4.81161	-3.75016	0.000414757	0.0135926	-0.530305
SPECC1	0.922532	5.83386	3.74989	0.000415121	0.0135926	-0.53292
ZBTB7C	1.33995	2.44508	3.74757	0.000418206	0.0136793	-0.285767
GLB1L2	-0.980466	4.4932	-3.74569	0.000420728	0.0137474	-0.533705
RP11-93H12.4	-2.11319	-0.357375	-3.74414	0.000422807	0.0137868	-0.251862
KBTBD7	-0.723834	4.16349	-3.74394	0.000423077	0.0137868	-0.522747
CACNB3	1.04801	3.80874	3.74381	0.000423253	0.0137868	-0.427532
C3orf52	1.62238	2.93712	3.74214	0.000425521	0.0138462	-0.330137
KLHL34	-1.98684	-0.266124	-3.73947	0.000429164	0.0139427	-0.260775
SFRP1	-1.83306	6.01745	-3.73931	0.000429376	0.0139427	-0.623796
HHATL	6.2274	5.09895	3.73821	0.00043088	0.0139662	-0.246992
MTND1P21	-1.58013	-2.71764	-3.73813	0.000430992	0.0139662	-0.116046
TMEM150C	-1.17092	4.74406	-3.73717	0.00043232	0.0139947	-0.582065
PTTG2	-1.59179	-0.915516	-3.73601	0.000433915	0.0140289	-0.213635
AP000997.3	-1.67071	-0.26525	-3.73576	0.000434271	0.0140289	-0.263697
SSX4B	-1.93708	-3.84747	-3.7342	0.000436437	0.0140843	-0.105103
RP11-445N18.5	-1.5491	-3.70746	-3.73087	0.000441089	0.0142198	-0.113398
COL4A5	1.30512	4.81463	3.72838	0.000444596	0.0143181	-0.521063
WBP1LP5	-1.78464	-3.04951	-3.72765	0.000445629	0.0143366	-0.138936
FAM218A	-0.910385	0.876864	-3.72553	0.000448653	0.0144082	-0.351522
EPHB1	-1.81851	4.85983	-3.72545	0.000448776	0.0144082	-0.633174
TK1	-1.19021	4.70014	-3.72497	0.000449455	0.0144153	-0.618153
RP5-1048B16.1	2.09802	0.938375	3.72464	0.00044993	0.0144157	-0.215339
RPL17P22	-1.91405	-2.84287	-3.72267	0.000452752	0.0144913	-0.164455
AC007563.5	-1.50136	-3.80912	-3.72185	0.000453947	0.0145147	-0.137363
FSIP1	-1.12865	0.72345	-3.72096	0.00045523	0.0145409	-0.355164
LRRC28	-0.610812	4.47325	-3.7203	0.000456184	0.0145565	-0.610844
EPHB4	0.944749	5.49058	3.71882	0.000458333	0.0146102	-0.61126
RP5-1063M23.2	-1.35229	1.40838	-3.7185	0.0004588	0.0146102	-0.433949
GPR52	-0.899144	2.14996	-3.71723	0.000460668	0.0146548	-0.463124
RPS2P4	-1.45045	-0.996969	-3.71533	0.000463448	0.0147282	-0.26281
CTA-228A9.3	1.37878	3.04405	3.71369	0.000465885	0.0147907	-0.446843
EIF4E1B	-1.95919	-2.19777	-3.71205	0.000468313	0.0148527	-0.222219
SLFNL1-AS1	-1.12288	4.61567	-3.70942	0.000472242	0.0149621	-0.660464
SERPINB5	-1.6515	-3.22543	-3.70747	0.000475173	0.0150398	-0.190549
RP11-274H2.5	1.90252	1.62791	3.70626	0.00047701	0.0150827	-0.328044
FCRLB	-1.07342	1.73425	-3.70558	0.000478047	0.0151002	-0.472345
LINC00605	-1.75123	-1.45721	-3.70417	0.000480183	0.0151502	-0.28063
ABLIM2	-1.42959	4.06515	-3.70364	0.000480992	0.0151502	-0.656618
PARD3	-0.712524	6.24872	-3.70358	0.000481081	0.0151502	-0.721851
PCAT7	-1.45828	1.44267	-3.70215	0.00048327	0.0152038	-0.489989
RP11-416N2.4	-0.855925	2.14943	-3.70104	0.000484983	0.0152298	-0.513482
TBXAS1	0.864018	3.872	3.70098	0.000485069	0.0152298	-0.567482
CCSER1	-1.17848	4.57717	-3.69966	0.000487113	0.0152787	-0.687433
LRRC52	-2.19008	-1.20776	-3.69723	0.00049088	0.0153769	-0.329616
PTPRU	-1.20237	4.19912	-3.697	0.000491229	0.0153769	-0.672607
SYNGAP1	0.9536	5.92879	3.69628	0.000492358	0.0153884	-0.694862
RP4-545C24.1	-0.691059	6.10702	-3.69614	0.000492578	0.0153884	-0.740261
PANX1	-0.656802	4.0472	-3.6947	0.000494833	0.0154434	-0.664945
BLOC1S5	-0.812113	4.59277	-3.69422	0.000495587	0.0154515	-0.698877
C7orf72	-1.76884	-3.36691	-3.69336	0.000496936	0.0154782	-0.228449
LCMT1-AS2	-0.818175	4.41928	-3.69302	0.000497477	0.0154796	-0.690315
SLC27A3	0.883086	4.20545	3.69061	0.000501292	0.0155829	-0.621128
WNT7A	-1.88611	-0.873824	-3.68803	0.000505397	0.0156949	-0.365106
CTC-774J1.1	-1.55639	-0.464332	-3.68637	0.000508075	0.015755	-0.388296
NSMF	-0.984771	5.8263	-3.68607	0.000508548	0.015755	-0.768434
DNAH12	-1.44766	0.0310793	-3.68589	0.000508844	0.015755	-0.427948
CTD-2044J15.1	-1.03396	-0.370149	-3.68393	0.000512009	0.0158374	-0.381287
MAT1A	-2.70305	2.83244	-3.68241	0.000514473	0.0158979	-0.682384
RP11-343J3.5	-1.47895	-3.45451	-3.68179	0.000515497	0.0159138	-0.256709
DBH-AS1	-1.31305	2.83211	-3.68005	0.00051833	0.0159855	-0.649836
TMEM5-AS1	-1.58463	-2.44309	-3.67928	0.000519594	0.0160087	-0.29637
PTGDS	3.26038	7.05836	3.67881	0.000520381	0.0160172	-0.723977
AC046143.6	-1.88728	-1.16753	-3.67797	0.000521767	0.0160299	-0.378211
KLHDC2	-0.635621	5.92282	-3.67793	0.000521819	0.0160299	-0.789711
RP11-5N11.7	-1.75169	-2.3663	-3.67636	0.00052443	0.0160944	-0.314291
CACNB1	0.935152	3.06427	3.67546	0.000525926	0.0161244	-0.578037
GALNT9	-1.48558	0.563251	-3.67456	0.000527425	0.0161546	-0.490786
FBN1	1.44844	6.91967	3.67347	0.000529235	0.0161942	-0.789674
WDR41	-0.67133	5.02119	-3.67274	0.000530458	0.0162157	-0.77277
GPRC5C	1.13409	5.57076	3.67221	0.000531355	0.0162273	-0.749455
SGCE	0.809211	5.21864	3.66804	0.000538393	0.0164262	-0.755218
MTHFD2P1	-1.76284	0.641647	-3.66699	0.000540184	0.0164648	-0.54156
WFIKKN2	-1.82028	0.549956	-3.6647	0.000544113	0.0165592	-0.544153
CMSS1	-0.580287	2.9414	-3.66457	0.000544337	0.0165592	-0.678419
CTD-2588J6.1	-1.54007	-1.9235	-3.66381	0.000545636	0.0165826	-0.363198
RP11-848P1.2	0.628595	3.01845	3.66324	0.000546628	0.0165966	-0.629337
AC137932.4	-0.55033	2.99584	-3.66277	0.00054744	0.0166051	-0.688094
FAM83E	-1.77114	-1.0894	-3.66229	0.000548259	0.0166139	-0.42537
OPN3	-0.823282	3.35462	-3.66062	0.000551162	0.0166857	-0.719479
RPS26P47	-1.35387	-0.862256	-3.65947	0.000553158	0.01673	-0.438648
MAP3K12	0.604743	5.68047	3.65864	0.000554616	0.0167579	-0.809579
CTD-2561J22.5	1.05934	2.11497	3.65689	0.000557689	0.0168345	-0.555978
ACTN2	-1.50573	1.34592	-3.65571	0.000559761	0.0168642	-0.616614
RP11-780O24.2	-1.73408	-2.43389	-3.65542	0.00056027	0.0168642	-0.376221
LRRK1	0.831528	5.4459	3.65541	0.000560289	0.0168642	-0.794427
RP11-430C7.5	1.36166	1.69966	3.65465	0.000561641	0.0168817	-0.507529
RP11-953B20.1	-1.95779	-3.60951	-3.65447	0.000561951	0.0168817	-0.337654
EPHA8	-1.79607	-3.20971	-3.65364	0.00056343	0.0169099	-0.347159
SHISA8	-1.8141	-1.98515	-3.65238	0.000565669	0.0169609	-0.401167
RP4-594A5.1	-1.653	-3.43992	-3.65198	0.00056639	0.0169662	-0.34434
RP1-97G4.1	-1.75357	-1.87054	-3.65086	0.000568393	0.01701	-0.41342
LSM3P5	-1.46828	-3.05101	-3.64889	0.000571938	0.0170997	-0.358488
PLA2G4D	-1.52152	-3.6871	-3.64815	0.000573257	0.0171169	-0.348913
C1orf54	0.781925	1.71034	3.64781	0.000573887	0.0171169	-0.554484
CTD-2033D24.2	-1.35216	-1.58984	-3.64766	0.000574154	0.0171169	-0.423642
CTD-2373H9.3	0.912534	3.89776	3.64439	0.000580099	0.0172777	-0.737208
AP001046.6	-1.77636	-2.88882	-3.64292	0.00058278	0.017341	-0.38757
CLDN14	-2.04062	3.1774	-3.64257	0.00058342	0.0173436	-0.809442
C1orf147	-0.967542	1.56664	-3.64152	0.000585363	0.0173848	-0.653027
MGLL	0.915708	6.55413	3.64091	0.000586479	0.0174015	-0.884336
AC002429.5	-1.15934	2.31114	-3.64018	0.000587837	0.0174219	-0.724986
RPL32P26	-1.27172	-1.24219	-3.63978	0.000588579	0.0174219	-0.462343
RP11-820K3.2	-1.03411	0.119587	-3.63938	0.00058932	0.0174219	-0.555733
BRSK1	1.64718	2.48777	3.63934	0.000589394	0.0174219	-0.597371
RP11-138J23.1	-1.55534	-3.53244	-3.6388	0.000590394	0.0174313	-0.3787
RP11-151A6.6	-1.65765	2.00194	-3.63857	0.000590826	0.0174313	-0.719954
KLHL4	-1.89372	2.37874	-3.63754	0.00059273	0.017471	-0.773842
UNC79	1.7086	1.6028	3.63492	0.000597638	0.0175991	-0.539079
LILRB2	1.3244	3.16344	3.63121	0.000604656	0.0177821	-0.686383
AC007349.4	-1.88689	-1.99771	-3.63104	0.000604986	0.0177821	-0.468106
SLC2A2	-2.27662	2.18182	-3.62993	0.000607095	0.0178273	-0.783974
RP11-307O13.1	-1.51252	-2.9602	-3.62873	0.000609386	0.0178778	-0.419638
RPL21P9	-1.54426	-3.54538	-3.62816	0.000610476	0.017893	-0.408653
FOXK1	-0.732936	7.91973	-3.62611	0.000614417	0.0179917	-0.989341
C4A	1.58018	7.18697	3.62518	0.000616217	0.0180108	-0.934655
RP11-430H10.1	-1.47425	-2.39888	-3.62518	0.000616222	0.0180108	-0.450032
ANTXR1	1.06787	6.76876	3.62479	0.000616971	0.0180159	-0.937075
ST3GAL1	-0.64844	6.3628	-3.62341	0.000619661	0.0180776	-0.963215
OR4F15	-2.1098	-0.794202	-3.62295	0.000620541	0.0180804	-0.571807
RP11-185J20.1	-2.22139	-1.37499	-3.62276	0.000620914	0.0180804	-0.53404
RP11-439E19.10	-1.01516	3.21261	-3.62023	0.000625872	0.0182079	-0.838318
SLC9A7P1	1.17145	1.71741	3.61918	0.000627935	0.0182509	-0.621405
RPL17P1	-1.95216	-1.54509	-3.61883	0.000628626	0.0182541	-0.526864
TMEM87B	0.558459	4.74292	3.61571	0.000634807	0.0184165	-0.889395
ACE2	-2.60665	5.7115	-3.61533	0.000635556	0.0184211	-0.995784
MCTP2	1.01811	4.89073	3.61496	0.000636292	0.0184254	-0.886934
SLC44A2	0.794883	6.40501	3.61429	0.000637649	0.0184393	-0.963181
DACH1	-1.88024	5.13839	-3.61413	0.00063795	0.0184393	-0.977474
DLL1	2.31961	5.16755	3.61166	0.000642922	0.0185554	-0.845414
RP11-785G17.1	-1.53752	0.738554	-3.61145	0.000643347	0.0185554	-0.697009
LINC01484	-1.54333	-0.449975	-3.61125	0.000643746	0.0185554	-0.606973
HOXB3	0.942593	5.6971	3.61046	0.000645342	0.0185843	-0.93523
EXPH5	-1.23306	5.85654	-3.61006	0.00064615	0.0185905	-0.99753
LINC01126	-0.79837	1.82428	-3.60879	0.00064873	0.0186476	-0.762449
ABI3	0.884396	3.60685	3.60698	0.000652408	0.0187361	-0.82421
LRRN4CL	-2.19121	2.0159	-3.60624	0.000653925	0.0187624	-0.854072
RIPK4	-1.17186	4.69949	-3.60589	0.000654644	0.0187659	-0.967397
AP000230.1	-1.57726	-0.906853	-3.60499	0.000656486	0.0187919	-0.593788
ISM1	-1.46786	2.01733	-3.60486	0.000656753	0.0187919	-0.809255
RP11-453O5.1	-1.72351	-3.02727	-3.60198	0.000662706	0.0189413	-0.498298
RP11-761N21.1	-2.29893	-2.24633	-3.60175	0.000663183	0.0189413	-0.560573
LCE1A	-2.48472	-3.10791	-3.60075	0.000665259	0.0189806	-0.516601
CPN1	-2.06129	-0.596664	-3.60045	0.000665894	0.0189806	-0.654323
HOGA1	-1.1082	5.9375	-3.59999	0.000666847	0.0189806	-1.02864
CLIP2	0.847151	6.08538	3.59982	0.000667197	0.0189806	-0.992729
ENDOV	-0.569281	4.5516	-3.59963	0.000667592	0.0189806	-0.9719
SNX8	-1.05907	6.03086	-3.59816	0.00067067	0.0190508	-1.0343
UNC5D	-2.37775	4.7148	-3.59631	0.000674568	0.0191442	-1.02072
LINC01422	0.988661	2.85296	3.59552	0.000676237	0.0191741	-0.791027
LINC01485	-1.98337	-1.45515	-3.59482	0.000677724	0.0191989	-0.605483
C22orf29	-0.688056	5.17735	-3.593	0.000681597	0.0192809	-1.01052
CTB-43E15.2	-1.6991	-1.19899	-3.59288	0.00068185	0.0192809	-0.614354
MFHAS1	0.595993	6.35541	3.58975	0.00068855	0.0194528	-1.039
FAM149A	-1.09047	4.72344	-3.58883	0.000690533	0.0194912	-1.02426
PDE7A	-0.643467	6.50428	-3.58825	0.000691783	0.0195089	-1.06988
FOXC1	-0.987776	5.78217	-3.5864	0.000695787	0.0195905	-1.06291
EID2B	-0.636171	1.71992	-3.58634	0.000695929	0.0195905	-0.812463
RP11-834C11.11	0.962482	1.08833	3.58317	0.00070284	0.0197673	-0.691083
SRCIN1	-1.93058	3.49664	-3.58068	0.000708321	0.0198884	-1.00842
SHROOM2P1	-1.86271	-3.17129	-3.58064	0.000708417	0.0198884	-0.555044
COG8	-1.02222	6.61749	-3.57981	0.000710247	0.0199219	-1.10462
GRID2	-1.97149	-1.37985	-3.57765	0.000715049	0.02003	-0.658783
RP11-767C1.1	-2.20247	-3.20841	-3.5775	0.000715381	0.02003	-0.577169
SMC1B	-1.18143	-1.06578	-3.57679	0.000716973	0.0200567	-0.649464
KB-176G8.1	-1.79129	0.228525	-3.5735	0.000724365	0.0202454	-0.77625
NLRP3	1.0933	2.84795	3.57291	0.000725708	0.0202648	-0.853921
RP11-84H6.1	-2.64634	-0.169416	-3.57069	0.000730734	0.020387	-0.787141
RP11-391L3.4	-0.8346	3.73052	-3.56964	0.000733125	0.0204355	-1.01859
CYBRD1	1.12342	6.56231	3.56884	0.000734965	0.0204634	-1.09201
PECR	-0.910465	3.89625	-3.56863	0.000735435	0.0204634	-1.0312
F8A1	-0.757008	4.64402	-3.56625	0.000740903	0.0205972	-1.08137
LIMCH1	0.960043	5.8233	3.56572	0.000742144	0.0206034	-1.07954
RP11-1134I14.8	-1.18912	0.420187	-3.56559	0.000742442	0.0206034	-0.788764
GAL3ST4	0.999818	3.26539	3.56512	0.00074353	0.0206153	-0.911958
BHMT	-2.44517	6.83173	-3.5636	0.000747047	0.0206906	-1.16946
CYP26C1	-1.37114	0.158832	-3.56338	0.000747568	0.0206906	-0.78244
PAXIP1-AS1	-0.743024	3.127	-3.56252	0.000749571	0.0207183	-1.00202
FTL	1.05663	10.6939	3.56238	0.000749891	0.0207183	-1.1944
SCD5	1.38276	4.7325	3.56065	0.000753941	0.0207953	-1.01651
GRID1	-2.07065	3.87865	-3.56062	0.000754007	0.0207953	-1.08902
LINC01562	-1.53401	-1.92006	-3.55943	0.000756794	0.0208538	-0.669792
TANC2	0.66665	6.30602	3.55882	0.000758242	0.0208753	-1.12542
ATP10D	0.64386	5.88903	3.55759	0.000761145	0.0209369	-1.1125
AJAP1	-1.3336	5.53215	-3.55541	0.000766328	0.0210609	-1.15077
CX3CL1	-0.972519	5.9756	-3.5522	0.000774012	0.0212534	-1.16649
CTD-3051D23.1	-1.07098	0.628465	-3.5518	0.000774982	0.0212614	-0.842832
CD163L1	1.56538	3.42266	3.55117	0.000776481	0.0212667	-0.927644
OSBPL6	-1.67348	3.43968	-3.55115	0.000776533	0.0212667	-1.07929
SNX5	-0.543276	6.36333	-3.54949	0.000780547	0.0213579	-1.17881
RP5-952N6.1	-1.89623	-0.0550328	-3.54845	0.000783084	0.021391	-0.833316
RP11-403B2.10	-2.28836	-1.70753	-3.54801	0.000784149	0.021391	-0.73045
HAAO	-0.683075	4.56514	-3.54793	0.000784337	0.021391	-1.12508
RP11-626G3.1	-1.5477	0.780312	-3.54787	0.000784488	0.021391	-0.904199
ZDHHC23	0.638805	4.98164	3.54686	0.000786967	0.0214399	-1.10161
RNF43	-0.962424	4.24801	-3.5465	0.000787827	0.0214446	-1.12249
SCN5A	-1.48606	0.398757	-3.54611	0.000788781	0.021452	-0.855498
GS1-594A7.5	-1.61455	-1.55676	-3.5452	0.000791021	0.0214942	-0.728551
TLE1	0.989128	5.22912	3.54394	0.000794113	0.0215595	-1.10368
RP5-875H18.4	-1.29614	-1.21493	-3.54234	0.000798071	0.0216482	-0.743979
RP11-566K19.5	-1.42158	-0.465574	-3.54187	0.000799241	0.0216612	-0.802195
TMEM233	1.83171	1.85759	3.53907	0.000806201	0.0218122	-0.833628
SUMO3	-0.686568	5.46872	-3.53907	0.000806208	0.0218122	-1.18403
RAPGEF2	-0.4719	6.69951	-3.53827	0.000808212	0.0218394	-1.22009
TPST2	0.755629	4.67407	3.53811	0.00080861	0.0218394	-1.09887
AMPD2	-0.726353	5.4351	-3.53716	0.000811004	0.0218852	-1.18883
KRT89P	-1.65954	-3.58514	-3.53628	0.000813227	0.0219263	-0.666713
SNORA47	-1.47637	2.31932	-3.53527	0.000815755	0.0219756	-1.04651
LRRN1	-1.33231	4.327	-3.53246	0.000822893	0.0221374	-1.17403
GALNT10	0.490809	5.78172	3.53235	0.000823178	0.0221374	-1.18948
FABP5P2	-1.14187	-1.47798	-3.53163	0.000825016	0.0221678	-0.752659
RP11-406H23.5	1.08251	-0.496788	3.53053	0.00082784	0.0222246	-0.728417
DHRS4-AS1	-1.02257	4.60118	-3.5282	0.000833842	0.0223666	-1.18804
CTD-2545H1.2	-1.49677	0.0362825	-3.52745	0.00083576	0.0223988	-0.885438
C10orf35	-0.76745	1.75008	-3.52647	0.000838307	0.0224478	-0.98469
CDR2L	1.28897	4.07833	3.52568	0.000840361	0.0224836	-1.06384
RAB3D	0.87574	4.72814	3.52266	0.000848264	0.0226757	-1.14654
DDR1	1.22582	6.70878	3.52151	0.000851286	0.022737	-1.24254
HSBP1L1	-0.854725	4.26456	-3.52108	0.000852413	0.0227473	-1.19171
METTL8	0.748588	5.22286	3.52081	0.000853124	0.0227473	-1.19252
RHBDL2	1.19228	2.21881	3.51862	0.000858923	0.0228824	-0.957805
RP11-156P1.2	-0.677776	3.13018	-3.51699	0.000863264	0.0229785	-1.13229
AC011284.3	-1.38878	0.826429	-3.51562	0.000866908	0.0230559	-0.973455
OR4F14P	-1.74611	-1.16059	-3.51529	0.000867811	0.0230604	-0.84199
OR5M11	-1.52344	-3.45698	-3.51463	0.000869585	0.0230879	-0.72753
NDRG4	2.66903	5.33322	3.51277	0.000874581	0.0232009	-1.13247
RP1-140K8.5	2.48656	3.48156	3.51234	0.000875748	0.0232122	-0.999827
PCDHAC1	1.33839	2.06794	3.51112	0.000879059	0.0232802	-0.952336
BNIP3	-0.645953	5.68985	-3.51051	0.000880715	0.0233043	-1.27422
KIF6	-0.934099	0.907476	-3.50968	0.000882962	0.0233441	-0.983444
RP11-173M11.2	-1.06074	1.23472	-3.50769	0.000888402	0.0234681	-1.0113
BRPF3	-0.514286	6.25668	-3.50652	0.000891631	0.0235335	-1.30204
OR1J4	-1.74452	-2.89989	-3.5054	0.000894711	0.0235841	-0.773897
C12orf75	1.29045	4.10009	3.50528	0.000895056	0.0235841	-1.13613
TRPC3	2.09665	0.712488	3.50499	0.000895849	0.0235852	-0.83047
TNN	-1.3583	-0.0993908	-3.50419	0.00089805	0.0236232	-0.940076
CNTLN	-0.611503	4.96278	-3.50354	0.000899867	0.0236512	-1.26425
ZNF385D	-1.07255	3.55667	-3.50172	0.000904942	0.0237478	-1.2214
RP11-546K22.1	-1.54096	-1.36107	-3.5012	0.000906375	0.0237478	-0.861001
CTB-113P19.5	-1.14942	-1.55625	-3.50119	0.000906401	0.0237478	-0.8339
TTLL3	0.732514	6.722	3.50113	0.000906577	0.0237478	-1.30819
GSTT2B	1.11219	0.758751	3.49967	0.000910684	0.0238354	-0.897533
RP11-428J1.5	-0.888473	0.39653	-3.49772	0.000916173	0.023959	-0.969507
ANXA1	1.30104	5.41111	3.49728	0.000917396	0.0239653	-1.2467
VASH1	0.899775	6.29611	3.49709	0.000917944	0.0239653	-1.30209
RASEF	1.38827	4.09385	3.49303	0.000929484	0.0242464	-1.16141
FKBP10	1.61852	6.10402	3.49165	0.000933445	0.0243294	-1.28573
SLC16A9	-1.9774	5.51847	-3.48854	0.000942425	0.024543	-1.35459
RP11-332J15.3	-1.44208	-1.51387	-3.48775	0.000944717	0.0245823	-0.887635
MYOM2	-1.14093	2.77268	-3.48705	0.000946763	0.0246151	-1.19833
ITPR2	0.563679	7.73034	3.48548	0.000951346	0.0247137	-1.37974
RP11-405A12.2	-1.28266	-1.50349	-3.48248	0.000960167	0.0249053	-0.894484
PLXDC1	1.18786	5.05025	3.48243	0.000960313	0.0249053	-1.27371
POTEB3	-1.68496	-3.42321	-3.48122	0.000963904	0.0249777	-0.822662
RP1-317E23.6	-1.68944	-2.62753	-3.48059	0.000965772	0.0250054	-0.85145
SYT7	-1.39447	2.17453	-3.47915	0.00097004	0.0250952	-1.1962
ZNF74	-0.654492	4.02763	-3.47812	0.000973119	0.025154	-1.29502
CRIM1	-1.02922	8.3955	-3.4777	0.000974382	0.0251659	-1.43326
TMCC1	0.388817	5.10405	3.47728	0.000975645	0.0251777	-1.32261
ZNF853	-0.982333	3.16755	-3.47527	0.000981682	0.0253127	-1.26316
FMO5	0.72123	3.54417	3.47477	0.000983189	0.025315	-1.20201
RN7SKP248	-1.43109	-2.77453	-3.47471	0.000983388	0.025315	-0.855341
LPO	-1.4944	-2.35508	-3.47404	0.000985409	0.0253286	-0.880706
ZBTB20-AS2	-2.03458	-0.619456	-3.47399	0.000985536	0.0253286	-1.00638
RP13-204A15.5	1.04209	1.09698	3.47318	0.000988008	0.0253713	-1.00188
KRTAP10-6	-1.56381	-3.5637	-3.47083	0.000995157	0.0255339	-0.846582
RP11-453M23.1	-2.98928	-2.24556	-3.46964	0.000998808	0.0256066	-0.95235
TMEM212	-1.48981	-3.33241	-3.46771	0.00100475	0.0257379	-0.859842
TRIM32	-0.700575	4.90176	-3.46688	0.00100729	0.0257623	-1.3734
EHD2	0.933188	5.94829	3.46686	0.00100735	0.0257623	-1.37056
BCAT1	-1.37947	4.54861	-3.46514	0.00101268	0.0258774	-1.37791
SH3PXD2A-AS1	-1.17863	0.463378	-3.4613	0.00102468	0.0261628	-1.09955
AQP7	-1.13887	4.11712	-3.46077	0.00102634	0.0261839	-1.36678
ACVRL1	0.878982	4.71112	3.46004	0.00102866	0.0262216	-1.32897
RIN3	0.855895	5.44788	3.4592	0.00103131	0.0262677	-1.37494
ATP6V1C2	-1.09824	3.37211	-3.45861	0.00103315	0.0262782	-1.32639
TMEM173	0.854294	4.97253	3.45853	0.0010334	0.0262782	-1.34824
CADM1	-1.14996	5.20723	-3.45809	0.00103481	0.0262927	-1.41638
BRINP1	1.80591	1.22546	3.45594	0.00104166	0.0264454	-1.02112
MERTK	0.560464	4.94689	3.45511	0.00104429	0.0264829	-1.37249
RP11-245G13.1	-1.48092	-3.35768	-3.45494	0.00104483	0.0264829	-0.893678
RPL30P7	-1.52995	-3.4555	-3.45308	0.00105082	0.0266132	-0.897805
HOXD8	1.44655	3.96519	3.45196	0.00105443	0.0266828	-1.2702
RP11-195B3.1	-1.76134	-3.1913	-3.45023	0.00106002	0.0268027	-0.914842
STAT2	0.573322	6.91433	3.44851	0.00106561	0.0268985	-1.46329
RAB31	1.03177	5.29896	3.44851	0.00106562	0.0268985	-1.39166
ANKRD33B	-1.28104	6.73459	-3.44827	0.00106639	0.0268985	-1.49221
KLHDC7A	-1.83984	5.26437	-3.44694	0.00107073	0.0269863	-1.46538
SCEL	-2.55975	1.09233	-3.44512	0.00107672	0.0271155	-1.24677
C5orf47	-1.49302	-1.69162	-3.44359	0.00108175	0.0272202	-0.996027
MAEL	1.69903	-0.796781	3.44304	0.00108357	0.0272443	-0.943562
IGF2	-1.85875	7.37154	-3.44264	0.00108492	0.0272562	-1.52524
AC104088.1	-1.49243	-3.86355	-3.44106	0.00109016	0.0273479	-0.922243
CCDC150	-1.09105	2.39585	-3.44098	0.00109043	0.0273479	-1.30658
RP11-334J6.6	-1.11653	-1.6352	-3.44075	0.00109119	0.0273479	-0.994913
PA2G4P2	-1.28837	-1.7331	-3.43891	0.00109734	0.02748	-1.00931
LINC00609	-1.37017	-3.71683	-3.43801	0.00110036	0.0275061	-0.931706
C15orf27	-1.03368	3.0728	-3.43783	0.00110097	0.0275061	-1.36933
IRX5	2.59623	2.69263	3.43775	0.00110125	0.0275061	-1.13226
HIST2H2BB	-1.47005	0.530765	-3.43755	0.00110189	0.0275061	-1.17659
PNMA6A	-1.37938	4.21752	-3.43642	0.00110571	0.0275267	-1.45183
TCEB3B	1.3282	2.13163	3.43629	0.00110616	0.0275267	-1.16631
RNU1-106P	-1.41489	-1.79926	-3.43609	0.00110683	0.0275267	-1.0134
CD97	0.954331	5.61099	3.43595	0.00110729	0.0275267	-1.4453
AC073343.13	-1.36402	-2.02218	-3.43522	0.00110979	0.0275267	-0.996295
PGPEP1L	-1.74685	-1.06783	-3.43522	0.00110979	0.0275267	-1.06909
RP11-296P7.4	-1.04618	-1.09512	-3.43503	0.00111043	0.0275267	-1.04474
AL050303.12	-1.30304	-3.98896	-3.43491	0.00111084	0.0275267	-0.934175
CCDC109B	0.86839	2.448	3.4348	0.00111119	0.0275267	-1.22132
HAGLROS	1.35467	-0.0772296	3.43471	0.00111151	0.0275267	-1.00925
RP11-351E7.2	-1.37697	-3.91352	-3.43221	0.00112001	0.0277151	-0.943601
FAM196B	1.38787	4.55783	3.43069	0.00112522	0.0278222	-1.37929
RP11-556I14.2	-1.5716	-3.61957	-3.42872	0.001132	0.0279548	-0.961897
USP25	-0.459916	5.92073	-3.42861	0.00113238	0.0279548	-1.51516
RP5-968D22.1	-1.57864	-2.88863	-3.42542	0.00114346	0.0281894	-0.988974
RP3-393E18.2	1.53199	1.14133	3.42536	0.00114368	0.0281894	-1.10732
CD209	1.51735	3.07151	3.42423	0.00114761	0.0282641	-1.27672
EML5	-1.18343	4.02395	-3.42309	0.00115159	0.0283397	-1.47151
OSBP2	-1.12251	4.46843	-3.42221	0.00115471	0.0283941	-1.49072
PPIAP19	-0.983073	0.432748	-3.42032	0.00116136	0.0285196	-1.19461
ZSCAN1	-1.31285	1.03601	-3.42024	0.00116163	0.0285196	-1.26095
FRMD3	-0.883602	4.64896	-3.4192	0.00116531	0.0285876	-1.50103
RP11-368J21.3	1.57055	-0.137612	3.41843	0.00116805	0.0286207	-1.04506
FADS2	0.986572	4.67743	3.41831	0.00116849	0.0286207	-1.44315
SMG1P3	0.801608	7.89153	3.41628	0.00117572	0.0287754	-1.57919
GPR61	-1.78491	1.18095	-3.41601	0.00117669	0.0287765	-1.30693
AP004782.1	-1.82745	-1.92016	-3.41442	0.00118241	0.0288938	-1.08068
RP11-724N1.1	-1.39183	-1.28951	-3.41251	0.00118929	0.0290193	-1.10863
RP11-286N22.14	-0.935796	1.10655	-3.41248	0.0011894	0.0290193	-1.28985
RP11-390P24.1	0.693469	1.49187	3.41169	0.00119225	0.0290662	-1.2204
TMEM106C	-0.802835	4.51395	-3.40626	0.00121213	0.0295279	-1.52604
TRIM22	0.90742	5.93766	3.40504	0.0012166	0.0296137	-1.54205
RP11-624L4.1	-1.88248	2.20557	-3.40297	0.00122428	0.0297644	-1.43214
KIAA1549	-0.726515	5.71985	-3.40286	0.00122469	0.0297644	-1.58715
CDCA2	-1.63453	0.887976	-3.40237	0.00122652	0.0297857	-1.30872
XKR5	-1.04713	-1.50242	-3.39996	0.00123554	0.0299815	-1.1133
OSBPL3	0.82756	5.20964	3.39955	0.00123708	0.0299955	-1.52583
SPCS2P3	-1.69201	-2.3835	-3.39895	0.00123933	0.030004	-1.09246
ANO9	2.01973	5.49201	3.39895	0.00123934	0.030004	-1.50286
BCAT2	1.51078	6.10078	3.39847	0.00124113	0.030024	-1.55403
SPACA4	-1.37214	-3.27169	-3.39763	0.0012443	0.0300774	-1.05005
ZNF425	-0.729858	1.53404	-3.39694	0.00124692	0.0301175	-1.34738
LINC01128	-0.626532	4.25618	-3.3955	0.00125237	0.0302259	-1.54129
C1QA	1.40304	5.30954	3.39489	0.00125469	0.0302586	-1.52073
HIPK2	-0.584117	8.56546	-3.39381	0.00125879	0.0303341	-1.67139
AC016995.3	-1.04589	-0.117895	-3.39289	0.00126233	0.0303959	-1.2282
RP11-757F18.5	1.5998	1.13661	3.39121	0.00126877	0.0305275	-1.20117
AP001065.7	-1.61387	-2.46581	-3.39064	0.00127096	0.0305567	-1.11079
RP11-1084J3.1	-1.88232	0.653811	-3.39037	0.00127199	0.0305581	-1.33348
GSTO2	1.26581	3.50903	3.38904	0.00127715	0.0306585	-1.42259
CTD-3076M17.1	-2.40531	3.00229	-3.38823	0.00128027	0.0307098	-1.54435
RP11-255M6.1	-1.52652	0.618963	-3.38613	0.00128847	0.0308202	-1.33108
LINC00535	-1.07757	-0.751559	-3.38611	0.00128854	0.0308202	-1.20251
GNA12	-0.535191	6.10463	-3.38585	0.00128955	0.0308202	-1.64322
SLC45A4	-0.725593	6.46701	-3.38576	0.00128988	0.0308202	-1.6556
WI2-2118C23.2	-1.53573	-3.38699	-3.38551	0.00129087	0.0308202	-1.08347
AC140725.8	-1.88415	-2.42232	-3.38538	0.00129136	0.0308202	-1.13501
CTD-2004A9.1	-2.16278	-1.91949	-3.38528	0.00129177	0.0308202	-1.17721
CDC42P6	-0.985037	1.79471	-3.38466	0.0012942	0.0308547	-1.40783
SNORD68	-1.70569	-2.39573	-3.38357	0.00129849	0.0309335	-1.13549
ABCG5	-1.32623	-0.782765	-3.38112	0.00130816	0.0310856	-1.22634
CHST10	-0.635071	3.6071	-3.38102	0.00130855	0.0310856	-1.54712
HDAC4	-0.63482	6.1432	-3.38093	0.0013089	0.0310856	-1.65931
LRRC43	-1.1255	1.03477	-3.38079	0.00130945	0.0310856	-1.3584
MIOS	-0.605626	4.80858	-3.38056	0.00131036	0.0310856	-1.60932
BCL2L1	-0.598364	7.13297	-3.38044	0.00131083	0.0310856	-1.68435
TLR6	0.942857	3.28245	3.3801	0.0013122	0.0310946	-1.44573
PLB1	0.943949	1.67937	3.37856	0.0013183	0.0312154	-1.31581
ATP2B1	0.640006	5.66124	3.37593	0.00132887	0.0314419	-1.6273
SLC17A8	-1.5598	-2.27505	-3.37546	0.00133074	0.0314624	-1.15483
CHST2	1.0435	4.01311	3.37513	0.00133206	0.0314698	-1.51098
DNAJA1P2	-1.72918	-2.55268	-3.37453	0.0013345	0.0315018	-1.14986
ANKFN1	-2.12247	-0.897794	-3.3743	0.00133543	0.0315018	-1.26774
RP11-490M8.1	-1.25024	-0.906301	-3.3738	0.00133742	0.0315251	-1.23456
RP11-219A15.4	-1.42894	-4.01881	-3.37351	0.00133863	0.0315297	-1.10205
TUBB8P2	-1.04187	-1.51144	-3.37018	0.00135216	0.0318137	-1.19285
SGPP2	1.18769	5.28902	3.36999	0.00135294	0.0318137	-1.60854
HMGB3	-0.856192	3.8496	-3.36978	0.00135379	0.0318137	-1.59847
SULT4A1	-1.82277	0.789471	-3.36954	0.00135475	0.0318137	-1.40034
AC006019.3	2.06323	3.6954	3.36815	0.00136046	0.031924	-1.45039
LINC00337	-1.42308	-2.57754	-3.36774	0.00136217	0.0319401	-1.15782
ANKS6	-0.647061	5.55752	-3.36737	0.00136368	0.0319515	-1.67914
RP11-5N11.3	-1.76843	-2.36639	-3.36679	0.00136606	0.0319833	-1.18474
OR52A1	-1.56557	-3.18918	-3.36597	0.00136947	0.0320392	-1.14231
RP11-44F14.10	-1.56297	-2.2625	-3.36259	0.00138349	0.0323432	-1.18961
PCDHA10	1.45105	3.89937	3.36158	0.0013877	0.0324174	-1.52325
TUBGCP2	-0.478443	6.07128	-3.36004	0.00139417	0.0325287	-1.71306
RP11-114G22.1	-1.40118	-2.38944	-3.3596	0.00139604	0.0325287	-1.18551
ASIC1	-0.722825	1.22954	-3.35932	0.00139722	0.0325287	-1.41597
ATP8B4	0.67965	4.22742	3.35929	0.00139733	0.0325287	-1.59541
EPM2A	-0.524727	4.74912	-3.35914	0.00139797	0.0325287	-1.66996
DCTD	-0.491068	5.56861	-3.35873	0.0013997	0.0325287	-1.70029
SLCO4A1-AS1	-1.73308	0.167703	-3.35872	0.00139974	0.0325287	-1.3845
AC005534.6	-1.34456	-1.50279	-3.35715	0.0014064	0.0326591	-1.24353
SLC12A6	-0.559693	6.25451	-3.35684	0.0014077	0.0326651	-1.73134
RP11-391L3.5	-0.706911	2.4494	-3.35649	0.00140919	0.0326754	-1.52475
FZD4	-0.796485	7.04964	-3.35505	0.00141533	0.0327091	-1.75621
PLCL1	-1.09953	5.58724	-3.35496	0.00141572	0.0327091	-1.72569
STAT5A	0.553162	4.92485	3.3547	0.00141683	0.0327091	-1.65552
KIAA1731NL	1.02391	3.2533	3.35462	0.00141714	0.0327091	-1.5106
SLC7A7	1.15917	4.17036	3.35452	0.00141758	0.0327091	-1.57758
ANKDD1A	0.670064	2.96428	3.35439	0.00141814	0.0327091	-1.49938
RP11-536I6.2	-1.73823	-2.30655	-3.35435	0.00141832	0.0327091	-1.21594
CHRNA2	-1.58607	-1.78257	-3.35419	0.001419	0.0327091	-1.24547
AC008132.13	-1.63007	-1.46516	-3.35341	0.00142233	0.0327617	-1.27263
LINGO1-AS2	-1.79853	-3.03764	-3.35286	0.00142469	0.0327921	-1.188
CNN2	0.929295	5.82074	3.35224	0.00142733	0.0328286	-1.69058
MTTP	-2.1741	0.846668	-3.3504	0.0014353	0.0329857	-1.47635
LINC00345	-1.29187	-1.26376	-3.35017	0.00143627	0.0329857	-1.27103
AC010883.5	-1.13142	-1.54147	-3.34775	0.00144678	0.0332028	-1.25942
ANKRD26P2	-1.86997	-3.01803	-3.34721	0.00144913	0.0332324	-1.20654
AC004988.1	-1.53238	3.26523	-3.34559	0.00145621	0.0333703	-1.66371
PFN4	-0.863897	-0.633576	-3.34502	0.00145872	0.0334034	-1.3145
CTD-2299E8.1	-1.74355	-3.04243	-3.34405	0.001463	0.0334767	-1.21094
DGKG	-1.11108	3.3433	-3.34293	0.00146792	0.033565	-1.64759
SEMA6D	1.4741	4.93074	3.34256	0.00146955	0.0335777	-1.64468
CTA-253N17.1	-1.08462	-0.730368	-3.34185	0.00147271	0.0336253	-1.32767
SLC25A48	-1.85513	1.56589	-3.34111	0.00147599	0.0336637	-1.55482
CTD-2267D19.3	0.991466	2.20114	3.34098	0.00147655	0.0336637	-1.4569
RP11-363E6.3	-1.55646	-2.19421	-3.3387	0.0014867	0.0338386	-1.25954
AC099668.5	-1.27469	-0.522983	-3.33853	0.00148746	0.0338386	-1.37087
AC026904.1	-1.73065	0.206979	-3.33853	0.00148747	0.0338386	-1.44688
ANKRD26P3	-2.897	-0.359462	-3.33829	0.00148854	0.0338386	-1.44422
KRTAP10-3	-1.71667	-3.19803	-3.33768	0.00149126	0.0338543	-1.22077
ITPR3	-1.10971	6.07757	-3.33765	0.00149139	0.0338543	-1.7865
HOXC11	1.60936	0.276476	3.33677	0.00149535	0.0339195	-1.29127
VWDE	2.09087	0.798012	3.33639	0.00149707	0.0339218	-1.30932
KRTAP10-2	-1.80984	-3.15473	-3.3361	0.00149837	0.0339218	-1.23044
GNRHR2P1	-1.69081	-3.5825	-3.33603	0.0014987	0.0339218	-1.21468
GS1-166A23.2	-1.48106	-1.25708	-3.33343	0.00151045	0.0341626	-1.32981
SUGCT	-1.35761	3.84179	-3.33319	0.00151152	0.0341626	-1.71314
RP1-80N2.3	-1.01899	0.996631	-3.33083	0.00152228	0.0343808	-1.49692
AC133785.1	-1.64168	-2.98934	-3.32864	0.00153233	0.034583	-1.25051
RP6-24A23.7	-1.46901	-2.42503	-3.32795	0.00153551	0.0346298	-1.2735
SPRY4	0.863306	5.53356	3.32499	0.00154918	0.0349129	-1.75665
NHSL1	0.786519	5.74116	3.32469	0.00155056	0.034916	-1.77141
RP11-403B2.3	-2.1721	-0.663081	-3.32448	0.00155155	0.034916	-1.41906
EDIL3	1.75835	4.99348	3.32363	0.00155551	0.03498	-1.69409
GGT7	0.746263	4.50984	3.3223	0.00156174	0.0350949	-1.70276
THPO	-1.52241	1.01595	-3.32199	0.0015632	0.0351026	-1.54013
CYP2C8	-1.3729	0.564114	-3.32096	0.00156804	0.0351858	-1.49753
SELV	-1.59829	-2.78963	-3.31906	0.00157697	0.035361	-1.28362
TRAV30	-1.79332	-1.85937	-3.31831	0.00158051	0.0353928	-1.34139
TBC1D1	-0.567214	6.99942	-3.31811	0.00158147	0.0353928	-1.85599
SSTR2	-0.926641	3.47751	-3.31804	0.00158178	0.0353928	-1.73509
HMCN1	1.28555	5.44548	3.31603	0.00159137	0.0355819	-1.75968
RP3-395M20.7	1.78818	2.07926	3.31449	0.00159872	0.0357208	-1.47624
IRX1	-2.21698	3.43692	-3.31374	0.00160228	0.0357748	-1.77339
MUC7	-1.93863	-3.12768	-3.31288	0.00160642	0.0358417	-1.29666
ARHGAP27	0.920694	6.08344	3.3124	0.00160876	0.0358682	-1.81419
SLC19A2	-0.928337	6.4874	-3.31147	0.00161324	0.035916	-1.86876
PNLIPRP3	-3.12093	1.21462	-3.31129	0.00161411	0.035916	-1.65246
RP11-78J21.4	-1.46733	-0.84558	-3.31124	0.00161434	0.035916	-1.41267
SLC25A16	-0.706036	6.54751	-3.3106	0.00161741	0.0359587	-1.87264
RP11-1C1.6	-2.2279	-1.80619	-3.30944	0.00162308	0.0360447	-1.39109
BDKRB2	1.21937	3.86408	3.30933	0.00162358	0.0360447	-1.67569
ALMS1P	-1.0865	1.73424	-3.30761	0.00163197	0.0362053	-1.61811
SEZ6L2	2.06	3.53394	3.30716	0.00163418	0.0362286	-1.6012
UAP1L1	1.09258	6.2432	3.30635	0.00163813	0.0362905	-1.83448
AC008697.1	1.22398	-0.014958	3.30564	0.0016416	0.0363264	-1.37571
PCDH12	0.963705	4.6716	3.30531	0.00164322	0.0363264	-1.75769
RP11-356B19.11	-0.890087	0.671356	-3.30531	0.00164323	0.0363264	-1.53142
MLLT11	0.650242	4.01028	3.30491	0.00164521	0.0363443	-1.72173
ZNF682	0.567937	2.5346	3.30398	0.00164977	0.0364193	-1.62096
DBH	-1.29534	2.10728	-3.30367	0.00165133	0.0364281	-1.67502
IGFBP1	-1.83708	-0.0394011	-3.29932	0.0016729	0.036878	-1.5307
PKNOX1	-0.447666	4.45554	-3.29755	0.00168178	0.0370477	-1.82319
STK32A	2.05242	1.83057	3.29725	0.00168329	0.0370549	-1.49562
SDK1	-1.15284	5.79769	-3.29673	0.00168587	0.0370856	-1.896
EAF2	-0.960892	1.67074	-3.29362	0.00170161	0.0374055	-1.64662
TMEM27	-2.33583	4.58128	-3.29308	0.00170437	0.0374399	-1.88094
RP11-28B23.1	-1.53537	-1.74593	-3.29279	0.00170585	0.0374461	-1.41238
NKD2	-1.47926	3.34482	-3.29232	0.00170822	0.0374719	-1.8066
C16orf70	-0.395984	4.65927	-3.29184	0.00171069	0.0374936	-1.85039
ASIC3	-0.917185	2.03113	-3.29164	0.00171167	0.0374936	-1.68331
ADAT2	-0.748657	3.77653	-3.29141	0.00171287	0.0374936	-1.80723
AP000462.3	-1.07209	-1.33513	-3.29119	0.001714	0.0374936	-1.42379
COLQ	0.798992	2.72192	3.29071	0.00171646	0.0375211	-1.6497
ZNF365	1.4818	1.55159	3.28716	0.00173472	0.0378938	-1.53149
FAM107B	-0.970033	6.10801	-3.28681	0.00173653	0.0378962	-1.92961
RPH3A	-1.59906	-2.43189	-3.28667	0.00173725	0.0378962	-1.39009
RP11-5N11.1	-1.41783	-1.89965	-3.28575	0.00174202	0.0379738	-1.41609
ANO7	-0.872192	3.1527	-3.28539	0.00174387	0.0379877	-1.78318
NPM1P35	-1.39427	-3.58114	-3.28492	0.00174635	0.0379953	-1.3464
GDA	2.7004	6.21524	3.28476	0.00174714	0.0379953	-1.83661
SIAH2	-0.482936	4.21166	-3.28462	0.0017479	0.0379953	-1.85353
APOH	-1.83674	-1.95544	-3.28439	0.00174907	0.0379953	-1.4312
RP11-5C23.2	-0.671789	0.535104	-3.28384	0.00175194	0.0380312	-1.56681
RP11-25D3.1	-1.54558	-2.20408	-3.28283	0.00175722	0.0381194	-1.41857
ZNF511	-0.541566	3.04255	-3.28257	0.00175861	0.0381232	-1.77239
RP5-834N19.1	-1.45562	-2.54005	-3.28217	0.0017607	0.0381419	-1.38996
P2RY13	1.12649	2.55399	3.28152	0.00176412	0.0381897	-1.64707
RP11-5N11.6	-1.49607	-1.8323	-3.28104	0.00176661	0.0382171	-1.43644
LINC01116	1.15927	1.4476	3.28035	0.00177023	0.0382481	-1.56214
MTUS2-AS1	-1.69059	-2.73941	-3.28031	0.00177048	0.0382481	-1.3908
PYCARD	1.53976	2.56886	3.27941	0.00177521	0.0383112	-1.62886
C21orf91	1.25057	4.68808	3.27929	0.00177585	0.0383112	-1.81797
WIPF3	-0.839213	4.09518	-3.27855	0.00177979	0.0383697	-1.86664
RP11-373E16.3	-1.61701	-2.28256	-3.27777	0.00178391	0.038432	-1.42353
C19orf81	-1.61026	-0.763508	-3.27575	0.00179468	0.0386375	-1.5263
RP11-143N13.2	-1.78465	-2.04651	-3.2752	0.00179758	0.0386732	-1.44903
TEAD2	0.766556	4.23136	3.27329	0.00180784	0.0388672	-1.8281
RP11-218E20.3	1.67101	0.672694	3.27231	0.00181311	0.038954	-1.49291
PNMA1	0.666589	5.74367	3.27181	0.00181581	0.0389852	-1.92277
KAT7	-0.375311	6.41985	-3.2709	0.00182073	0.039064	-1.97171
SLC30A3	-1.39408	-0.905668	-3.27007	0.00182522	0.0391334	-1.52133
RNU2-11P	-1.28572	-3.3924	-3.2693	0.00182941	0.0391965	-1.39054
WI2-1896O14.1	-1.99533	-2.6649	-3.26862	0.00183311	0.0392488	-1.4375
SMPDL3B	-1.72629	3.26707	-3.26817	0.00183556	0.0392745	-1.87375
EID3	0.756957	2.61981	3.26724	0.00184062	0.0393559	-1.71348
KRT8P12	0.650791	2.20206	3.26701	0.00184188	0.039356	-1.67999
LINC00616	-1.64729	-3.70677	-3.26625	0.00184603	0.0394177	-1.39725
SLC6A15	-2.91213	3.91	-3.26543	0.00185057	0.0394878	-1.94115
CKMT1B	1.90188	0.311087	3.26228	0.00186795	0.0398313	-1.48129
ARL4C	1.08473	5.63954	3.26181	0.00187056	0.0398599	-1.93161
IGDCC4	1.65817	4.17753	3.2606	0.00187727	0.0399757	-1.81095
NOVA1	0.815384	4.55836	3.25945	0.00188371	0.0400554	-1.88754
PSMG3-AS1	-0.669901	3.88696	-3.25941	0.00188394	0.0400554	-1.90162
RP11-531A21.3	-1.32991	-1.96376	-3.25903	0.00188605	0.0400554	-1.47847
C4B	1.39898	6.81984	3.25901	0.00188613	0.0400554	-1.97668
RP11-332J15.2	-1.43453	-3.2782	-3.25819	0.00189074	0.0401041	-1.42417
CTC-321K16.1	-1.62677	-1.18352	-3.25815	0.00189099	0.0401041	-1.54488
EDDM3CP	-0.988321	-0.735086	-3.25736	0.0018954	0.0401704	-1.55442
KRT8P50	1.17954	0.23055	3.25644	0.00190056	0.0402421	-1.52168
FTLP14	2.16148	-0.762891	3.2563	0.00190135	0.0402421	-1.44094
PPAPDC1A	-1.19271	0.719644	-3.25423	0.00191309	0.0404632	-1.68503
AL356289.1	-1.17442	0.323664	-3.25323	0.00191877	0.0405375	-1.6586
ITGB1BP2	1.13819	0.0296698	3.25315	0.0019192	0.0405375	-1.52318
LPCAT4	0.948106	3.9324	3.25169	0.00192751	0.0406856	-1.85263
CTD-3118D7.1	-1.38522	1.45692	-3.25092	0.00193193	0.0407246	-1.76739
C1RL	0.768041	5.2352	3.25092	0.00193195	0.0407246	-1.95349
RP11-378A12.1	-1.43405	-1.67989	-3.25021	0.00193598	0.0407819	-1.52561
RAD51D	-0.407625	5.00782	-3.24984	0.0019381	0.0407991	-1.98506
TFR2	-2.20191	1.11221	-3.24952	0.00193998	0.0408112	-1.78378
RP11-989F5.4	-1.35589	-2.9727	-3.24896	0.00194319	0.0408514	-1.45689
LINC01341	-0.991102	2.30934	-3.24814	0.00194792	0.0409234	-1.82589
FAM184B	-1.41407	-0.452708	-3.24741	0.00195211	0.0409839	-1.62922
C4B-AS1	1.29874	1.88122	3.24663	0.0019566	0.0410231	-1.67888
C4A-AS1	1.29874	1.88122	3.24663	0.0019566	0.0410231	-1.67888
RP11-425L10.1	-0.610945	2.81429	-3.24505	0.00196577	0.0411751	-1.86343
DCLK1	1.50833	4.16524	3.24493	0.00196648	0.0411751	-1.84879
AC009336.19	1.29836	3.43297	3.24418	0.00197085	0.0412389	-1.80594
PIAS3	0.401388	4.94927	3.24015	0.00199448	0.0417056	-1.98085
2021-09-04	0.865545	4.49624	3.23866	0.00200329	0.0418551	-1.94267
BPHL	-0.652279	4.68659	-3.23849	0.0020043	0.0418551	-2.00168
BEST3	-1.65214	-0.614765	-3.23774	0.00200878	0.0419205	-1.65206
CPT1B	0.948418	4.02669	3.23534	0.00202304	0.0421901	-1.90934
PLA2G12AP2	-1.42985	-3.46105	-3.23344	0.00203445	0.0423997	-1.48475
MME-AS1	-1.68926	-0.919364	-3.23234	0.00204107	0.0424978	-1.63833
FABP5P4	-1.60648	-3.14994	-3.23221	0.00204187	0.0424978	-1.50147
SH3PXD2A	-0.576733	7.5143	-3.23165	0.00204524	0.0425397	-2.10762
MYO19	0.541885	5.6843	3.22995	0.00205549	0.0427245	-2.03817
FBF1	0.795704	3.69529	3.22747	0.0020706	0.042968	-1.90904
RP11-538I12.2	-1.88331	-3.0926	-3.22724	0.00207204	0.042968	-1.5266
AC002366.3	0.867375	0.705243	3.22717	0.00207242	0.042968	-1.65902
CTC-261N6.1	-1.55268	-3.53287	-3.2271	0.00207285	0.042968	-1.50182
IL10RB	-0.663078	3.99769	-3.2269	0.00207407	0.042968	-2.00293
SYNE4	1.41147	1.14279	3.22628	0.00207792	0.0430192	-1.66585
KLF13	0.611094	6.79572	3.22317	0.00209704	0.0433864	-2.09626
LPCAT2	1.06627	3.70753	3.22265	0.00210027	0.0434245	-1.91168
MAN1A1	-0.789137	7.10996	-3.2217	0.00210617	0.0435177	-2.13041
CTC-321K16.4	-1.77847	0.309165	-3.22013	0.00211588	0.0436896	-1.77313
PTPLA	1.08	2.08247	3.21983	0.00211775	0.0436994	-1.77446
PDCL3P3	-1.46208	-3.84849	-3.21926	0.00212134	0.0437194	-1.51385
ZNF366	0.994978	3.12138	3.21923	0.00212152	0.0437194	-1.86581
RP11-274H2.3	1.65509	-0.288616	3.21759	0.00213182	0.0438669	-1.57222
RNF114	-0.415602	5.96699	-3.21743	0.00213281	0.0438669	-2.10386
ZNF467	0.998683	3.95721	3.21727	0.00213381	0.0438669	-1.94804
TMEM246-AS1	-1.60766	-1.1351	-3.21717	0.00213444	0.0438669	-1.66131
INHBA-AS1	-1.34017	-1.28655	-3.21697	0.00213568	0.0438669	-1.637
MPP3	0.835746	2.13518	3.21551	0.00214491	0.0440011	-1.80574
GPER1	-1.00437	4.16114	-3.21528	0.00214638	0.0440011	-2.05222
TTC39C	0.647043	4.09105	3.21523	0.00214665	0.0440011	-1.98607
SSR4P1	-0.727245	1.02887	-3.21505	0.00214784	0.0440011	-1.79432
KLHL23	-0.96484	3.67759	-3.2128	0.00216211	0.0442645	-2.02457
DAPK2	1.04252	3.18453	3.21209	0.00216659	0.0443273	-1.89502
IFITM10	1.4183	4.2967	3.21098	0.00217369	0.0444435	-1.97047
FAM166B	-1.14895	-0.37838	-3.21075	0.00217518	0.044445	-1.7119
ZP1	-1.51385	-2.73544	-3.21029	0.00217812	0.0444576	-1.57175
PLCD4	1.12249	3.45554	3.21021	0.00217864	0.0444576	-1.91228
LINC01296	1.86869	4.45709	3.20853	0.00218941	0.0446483	-1.97002
RB1CC1	-0.5218	6.4865	-3.20763	0.00219518	0.044736	-2.14932
RP11-96C23.14	-1.6155	-0.954751	-3.20742	0.00219657	0.044736	-1.69643
CNNM1	-1.18951	2.79695	-3.20657	0.00220203	0.0448181	-1.98515
PSMG1	-0.811655	3.74949	-3.20587	0.00220662	0.0448824	-2.04768
ERMAP	0.495695	4.38256	3.20465	0.00221453	0.0450139	-2.03765
ACSL4	0.989478	5.88473	3.20387	0.00221961	0.045047	-2.09732
RP11-556I13.2	-1.11903	-1.7426	-3.20375	0.00222039	0.045047	-1.63219
CCDC127	-0.519508	4.48485	-3.20359	0.00222146	0.045047	-2.08331
RP11-229P13.2	-0.805832	0.189903	-3.20352	0.00222191	0.045047	-1.7744
AC079466.1	1.98847	-0.999781	3.20307	0.00222479	0.0450762	-1.5771
PIN1P1	-1.28694	-3.39034	-3.20278	0.00222671	0.0450858	-1.56549
SMIM13	-0.488669	3.78924	-3.20246	0.00222883	0.0450997	-2.04487
HEPACAM	-1.57147	-1.72868	-3.20082	0.00223956	0.0452874	-1.65405
GPR37	2.61916	1.76939	3.19919	0.00225034	0.045476	-1.71992
AHCY	-0.845285	5.74343	-3.19819	0.00225693	0.0455798	-2.15719
PCDHAC2	1.05321	1.60955	3.19733	0.00226262	0.0456653	-1.80003
RP1-131F15.2	0.983473	1.02702	3.19664	0.00226723	0.0457288	-1.75849
TMEM38A	0.840816	2.14866	3.19569	0.00227352	0.0458262	-1.85339
HNRNPCP7	0.975039	0.620751	3.19547	0.002275	0.0458265	-1.7317
RP11-534L20.5	-1.05733	-1.86528	-3.19465	0.00228053	0.0459083	-1.64655
MID1IP1	-0.567662	4.95149	-3.19408	0.00228433	0.0459553	-2.1348
CTD-2184D3.1	-1.58187	-1.41157	-3.19326	0.00228979	0.0460356	-1.70404
RAP1GAP2	1.14521	4.90523	3.19289	0.00229227	0.0460558	-2.07377
LRPAP1	-0.657556	7.07938	-3.1919	0.002299	0.0461613	-2.20927
CTC-261N6.3	-1.45704	-3.63681	-3.19114	0.00230409	0.0462339	-1.59188
STARD4-AS1	-0.673238	4.86481	-3.18882	0.00231982	0.0465198	-2.14954
HERC2P3	0.715049	4.70282	3.18719	0.00233095	0.046713	-2.0933
GCSAM	0.955716	1.44217	3.18597	0.00233927	0.0468498	-1.82233
LINC01502	-1.6312	-3.37193	-3.18528	0.00234399	0.0469114	-1.61706
FOXRED2	-0.811876	5.47882	-3.18498	0.00234606	0.0469114	-2.18572
TOX	1.24873	2.64307	3.18487	0.00234684	0.0469114	-1.90417
CTD-2587M2.1	0.978116	2.23345	3.18374	0.00235457	0.0470066	-1.89264
SLC7A6OS	-0.425471	4.70086	-3.18374	0.00235461	0.0470066	-2.15236
LRRC25	0.929774	2.96752	3.18347	0.00235649	0.0470141	-1.95385
DDX10	-0.549502	4.58384	-3.18218	0.00236539	0.0471617	-2.14456
LGMN	1.28775	7.09903	3.18139	0.00237086	0.0472407	-2.20337
GOLGA8EP	-1.67531	-2.95432	-3.18029	0.0023785	0.0473624	-1.64448
PDZD2	-0.894903	5.56336	-3.18007	0.00238	0.0473624	-2.20488
RP4-550H1.4	-1.29096	-1.26569	-3.17982	0.00238174	0.0473671	-1.73422
CTD-2199O4.3	-2.56711	-0.934585	-3.17886	0.00238845	0.0474703	-1.80467
BMP7	-1.5429	3.53989	-3.17787	0.00239537	0.0475776	-2.13732
TRIM2	-0.886294	6.59729	-3.17681	0.0024028	0.0476949	-2.24009
RCAN3	1.0126	4.21788	3.176	0.00240855	0.0477786	-2.07839
FAM225B	2.56259	-0.254554	3.1737	0.0024248	0.0480706	-1.66861
C12orf49	-1.06728	7.82337	-3.17311	0.00242894	0.0481222	-2.27932
RN7SL369P	-1.46095	-3.54991	-3.17061	0.00244679	0.0484451	-1.64823
RP3-344J20.1	-1.34411	-3.8573	-3.16914	0.0024573	0.0485996	-1.64262
CXCL14	-1.86354	6.35391	-3.16908	0.00245769	0.0485996	-2.26892
PSMA6P4	-1.31392	-3.8929	-3.16873	0.00246027	0.0486197	-1.64285
PITPNM3	-0.907387	3.22146	-3.16716	0.0024715	0.0487989	-2.12632
RP11-362F19.3	-1.18676	-0.478125	-3.16691	0.00247331	0.0487989	-1.82759
PERM1	-2.32349	3.17617	-3.16676	0.0024744	0.0487989	-2.165
DENND5B	-0.495712	5.76182	-3.1666	0.00247557	0.0487989	-2.23837
C1QC	1.25959	5.79432	3.16464	0.00248977	0.049032	-2.19504
JMJD8	-0.568408	5.51378	-3.16454	0.00249052	0.049032	-2.23975
ITPRIPL2	0.48699	6.722	3.16398	0.00249457	0.0490807	-2.25703
AP000462.2	-1.11861	0.176944	-3.16359	0.00249739	0.0491055	-1.88421
RP11-32B5.8	-2.47915	0.871325	-3.16252	0.00250521	0.0492283	-2.00058
RPL5P7	-1.26013	-3.76519	-3.1618	0.00251052	0.0493017	-1.66298
CILP	2.16163	2.21011	3.16121	0.00251482	0.04934	-1.87758
FGD2	1.00684	5.08298	3.1611	0.00251562	0.04934	-2.17928
B3GAT2	-0.827487	2.33386	-3.15986	0.00252472	0.0494873	-2.06747
AHDC1	0.788379	6.382	3.15858	0.00253421	0.0496422	-2.24869
KCNQ5-AS1	-1.62222	-2.26865	-3.15827	0.00253643	0.0496547	-1.74215
TUBG2	0.570956	4.30163	3.15733	0.00254342	0.049746	-2.14882
AGAP7P	-1.70228	-0.879299	-3.15722	0.00254427	0.049746	-1.83984
RN7SKP124	-1.3587	-2.13502	-3.15665	0.00254848	0.0497837	-1.74748
RP11-5N11.4	-1.48332	-1.78863	-3.15653	0.00254938	0.0497837	-1.76826
AC016712.2	-1.27026	-1.84267	-3.15589	0.00255414	0.0498155	-1.75459
RRN3P3	0.586082	4.81913	3.15588	0.00255419	0.0498155	-2.20007
DMGDH	-1.35097	5.50146	-3.15549	0.00255706	0.0498404	-2.27627
AVP	-1.62658	-3.11542	-3.15402	0.00256807	0.049997	-1.70607
PACSIN1	-1.40871	2.1965	-3.15387	0.0025692	0.049997	-2.09034
CXADRP2	-2.06215	-1.89558	-3.15371	0.00257041	0.049997	-1.79104
HIST1H2AC	-0.67977	5.8218	-3.15356	0.00257148	0.049997	-2.27832
CCT7P1	-1.07364	-0.230654	-3.15286	0.00257677	0.0500687	-1.87337
ADORA1	-1.24596	3.28203	-3.15066	0.00259329	0.0503585	-2.18104
ATP7B	-0.615927	4.88852	-3.15035	0.00259563	0.0503725	-2.25158
GIMAP8	0.913325	4.19361	3.14968	0.00260071	0.0504316	-2.14629
FAM96A	0.735187	4.51717	3.14944	0.00260257	0.0504316	-2.17908
PTCSC3	-1.76272	-2.45353	-3.14931	0.0026035	0.0504316	-1.75815
RP11-570L14.1	-0.88427	-0.241651	-3.14848	0.00260984	0.0504995	-1.87904
RP11-121M22.1	-1.03535	-0.032823	-3.14823	0.0026117	0.0504995	-1.90363
RP11-515E23.1	-1.16723	-4.03629	-3.14821	0.00261185	0.0504995	-1.691
RP5-903G2.2	-1.29536	-2.48336	-3.14732	0.00261861	0.0505655	-1.74371
CTD-3064M3.4	-1.52476	-0.81142	-3.14722	0.00261938	0.0505655	-1.86917
RP11-476M19.2	-1.37317	-3.09385	-3.14713	0.00262011	0.0505655	-1.71816
RP4-539M6.19	-1.60698	-3.44259	-3.14552	0.00263236	0.0507707	-1.71732
RP11-554A11.7	-1.25897	-0.688879	-3.14526	0.00263437	0.050778	-1.86853
NDUFAF6	-0.476559	3.10311	-3.14485	0.00263755	0.0508035	-2.14448
DYNC1I1	-1.11067	2.45225	-3.14467	0.00263893	0.0508035	-2.12099
AP000695.6	-1.53435	0.560188	-3.14418	0.00264269	0.0508394	-1.98129
RP11-749H17.2	-1.31095	-3.59249	-3.144	0.00264404	0.0508394	-1.71288
AC005682.6	-1.20449	-1.77514	-3.14369	0.00264645	0.0508544	-1.7908
CARD14	-1.68391	4.28155	-3.14337	0.00264885	0.0508693	-2.26775
ZNF385B	-1.43497	4.89518	-3.14309	0.00265102	0.0508797	-2.28575
NTSR2	-3.0303	2.39278	-3.14287	0.00265276	0.050882	-2.19595
CTD-2619J13.8	0.941514	1.32467	3.1426	0.00265483	0.0508906	-1.92645
LRP1	0.89194	9.01767	3.14232	0.00265698	0.0509005	-2.35862
SPAG5	-1.17914	3.9624	-3.14011	0.00267411	0.0511591	-2.25027
RP11-349J5.2	-1.50303	-2.70649	-3.14003	0.00267474	0.0511591	-1.75751
RP11-130L8.2	-1.18768	-2.07706	-3.13995	0.00267538	0.0511591	-1.7804
FTX	0.589515	8.22766	3.13865	0.00268545	0.0513204	-2.35956
AGBL3	-0.892335	2.21619	-3.13657	0.00270171	0.0515995	-2.12654
KCTD16	-1.46022	2.19887	-3.13586	0.00270731	0.051675	-2.14186
KIAA0408	1.41157	2.44839	3.13524	0.00271217	0.0517362	-2.02734
ATP8B1	0.645984	4.7368	3.13432	0.00271947	0.0518437	-2.24407
PSAPL1	-1.7548	1.53495	-3.13402	0.00272178	0.0518563	-2.10462
AC009237.11	-0.99863	-0.982117	-3.13309	0.00272914	0.0519649	-1.86469
PTCHD2	-1.56413	-0.539486	-3.13079	0.00274747	0.0522082	-1.9302
RP11-75C9.2	-1.264	-3.93924	-3.13065	0.00274859	0.0522082	-1.73972
UBE2CP3	-0.767183	2.38984	-3.13059	0.00274901	0.0522082	-2.14
MTMR9LP	1.14892	3.77818	3.13043	0.00275033	0.0522082	-2.15553
AC131097.4	-1.38975	-2.21836	-3.13039	0.00275059	0.0522082	-1.80573
LRRC7	-1.06658	1.4068	-3.13023	0.00275193	0.0522082	-2.07167
C15orf56	-1.1867	-0.465667	-3.12991	0.00275445	0.0522245	-1.91891
PDE10A	1.20197	4.26908	3.12959	0.00275701	0.0522413	-2.19451
CCDC27	-1.30859	-3.03297	-3.12838	0.00276671	0.0523934	-1.767
CTD-2507G9.1	-1.34646	-1.65924	-3.12741	0.00277452	0.0525096	-1.84766
SPRED1	0.551712	5.68145	3.12689	0.00277869	0.0525567	-2.318
PHOSPHO1	0.993637	2.25801	3.12639	0.00278271	0.052601	-2.04258
SERTAD3	0.480321	3.69832	3.12591	0.00278654	0.0526416	-2.19395
LEF1	1.25865	2.80356	3.12567	0.00278854	0.0526475	-2.08326
C14orf132	1.19992	5.41601	3.12484	0.00279521	0.0527417	-2.27919
GPR6	-1.39463	-3.45755	-3.12447	0.00279823	0.0527429	-1.76705
SOGA3	1.45189	3.133	3.12442	0.00279865	0.0527429	-2.09698
NAT8	-2.37036	5.20141	-3.12393	0.00280258	0.0527854	-2.36901
SLC7A5P2	1.84322	4.1843	3.12307	0.00280958	0.0528775	-2.17948
MME	-1.75253	5.72535	-3.12292	0.00281085	0.0528775	-2.38013
B3GNT8	0.847579	1.58048	3.12261	0.00281331	0.052892	-2.00841
BCRP2	-0.929876	1.2175	-3.12238	0.0028152	0.0528956	-2.07587
CYP21A2	1.56801	0.575248	3.12191	0.00281905	0.0529307	-1.88884
SHE	0.932328	4.40154	3.12143	0.00282298	0.0529307	-2.23703
RAB21	-0.521015	6.65298	-3.12118	0.00282501	0.0529307	-2.38894
IFI27L2	0.975391	2.67847	3.12113	0.00282545	0.0529307	-2.09048
SLIT2-IT1	-1.04721	-1.22838	-3.12112	0.00282552	0.0529307	-1.8794
CACNA1A	0.953861	1.90388	3.12067	0.0028292	0.0529679	-2.033
RRAS	0.858036	3.69956	3.12031	0.00283211	0.0529908	-2.18457
TMEM30B	1.29898	3.15121	3.11981	0.00283622	0.053036	-2.11597
PCOLCE	1.36628	4.27377	3.11937	0.00283985	0.0530562	-2.2167
METTL21A	-0.841805	5.26708	-3.11927	0.00284069	0.0530562	-2.36169
C4orf29	-0.517317	4.86978	-3.11854	0.00284667	0.0531361	-2.3406
CCDC167	-0.736999	1.35577	-3.1179	0.00285195	0.0532029	-2.08159
CRIP3	1.26367	0.483959	3.11763	0.00285417	0.0532127	-1.90586
RNF220	-0.37542	5.44848	-3.1174	0.00285611	0.0532171	-2.35755
NECAB1	-1.16499	3.14284	-3.11635	0.00286476	0.0532815	-2.25974
RP11-46C24.7	-0.639622	2.2264	-3.11628	0.00286534	0.0532815	-2.16823
RTN1	1.03342	2.88654	3.11618	0.00286618	0.0532815	-2.12693
FNTAL1	-1.49048	-3.22579	-3.11616	0.00286637	0.0532815	-1.79635
CTSH	0.960426	6.46306	3.11553	0.00287161	0.0533471	-2.36654
GPR78	-1.67523	1.5983	-3.11429	0.00288192	0.053507	-2.168
RP11-134G8.5	0.838505	2.28614	3.11308	0.00289196	0.0536615	-2.10126
OR2A42	-0.791901	4.20786	-3.1124	0.00289772	0.0537196	-2.33211
RP11-122F24.1	1.3112	-0.139437	3.1123	0.00289852	0.0537196	-1.87744
MS4A4E	1.13546	2.63083	3.112	0.00290099	0.0537198	-2.11839
CCNT2-AS1	-0.989434	-0.335714	-3.11154	0.00290488	0.0537198	-1.97684
RP11-700A24.1	-0.581073	2.15825	-3.11146	0.00290554	0.0537198	-2.1591
KRTAP12-2	-1.49562	-3.31766	-3.11145	0.00290567	0.0537198	-1.80673
HIVEP3	0.672451	5.10808	3.11128	0.00290712	0.0537198	-2.326
INPP1	0.554031	3.68184	3.11024	0.00291585	0.0538346	-2.23786
RSPH1	1.36499	0.27833	3.11005	0.00291744	0.0538346	-1.906
BHMT2	-1.09176	7.40896	-3.10992	0.00291848	0.0538346	-2.44183
ASB5	-1.43031	-2.07024	-3.10866	0.0029292	0.0540005	-1.86958
SNORA1	-1.5051	-2.27762	-3.1073	0.00294066	0.0541799	-1.86933
TTLL7	0.959051	3.68672	3.10644	0.00294801	0.0542832	-2.2349
P2RY12	1.36787	0.22609	3.10622	0.00294991	0.0542864	-1.91413
MOB3C	0.412446	4.78802	3.10575	0.00295392	0.0543282	-2.33312
MCAT	-0.618171	3.53762	-3.10507	0.00295972	0.0544006	-2.30098
RP11-358L22.3	-0.833516	0.0532382	-3.10488	0.00296133	0.0544006	-2.0242
RP11-132A1.3	-1.22412	-3.77418	-3.10402	0.0029687	0.054504	-1.81024
BCO2	0.874743	2.72457	3.10312	0.00297638	0.0546129	-2.16141
RPL5P14	-1.40477	-0.456906	-3.10277	0.00297941	0.0546366	-2.00999
LBX2-AS1	-0.770934	3.92561	-3.10187	0.00298711	0.0547414	-2.33953
PTAFR	0.891752	3.73544	3.1017	0.00298863	0.0547414	-2.25266
RP5-1142A6.7	-1.32902	-1.50918	-3.10127	0.00299232	0.0547769	-1.92385
HIST2H3PS2	-1.58869	-0.693014	-3.10083	0.00299616	0.0547852	-2.00279
CTSS	1.23756	5.20276	3.10081	0.00299627	0.0547852	-2.3311
SOX1	-1.17877	-3.96188	-3.09965	0.00300634	0.054929	-1.81666
CYP1B1	1.26605	6.13339	3.0995	0.00300765	0.054929	-2.38339
RGL1	-0.703997	6.02933	-3.09865	0.003015	0.0550312	-2.43049
RP11-230C9.2	-0.86777	0.686845	-3.09824	0.00301859	0.0550646	-2.09902
CD164L2	-1.84635	-2.62195	-3.09722	0.00302747	0.0551944	-1.88395
REPS2	-1.08597	4.69164	-3.09385	0.00305699	0.0557001	-2.40913
TNP2	-1.52664	-3.13352	-3.09343	0.00306073	0.055735	-1.85851
RP5-1059L7.1	1.04269	0.822445	3.09321	0.00306268	0.055735	-2.01135
RP11-204K16.1	-0.743133	-0.216516	-3.09303	0.00306424	0.055735	-2.01885
PDCD4	0.82706	6.71289	3.0926	0.00306808	0.0557724	-2.4362
RP11-38L15.3	-0.858942	0.525178	-3.09197	0.00307362	0.0558118	-2.09205
MIOX	2.17759	4.92154	3.09187	0.00307447	0.0558118	-2.29173
FAM49A	-1.21062	3.8544	-3.09175	0.00307559	0.0558118	-2.36894
EPHA6	-2.27326	0.992211	-3.09141	0.00307859	0.0558337	-2.21194
FYN	0.987874	5.44213	3.09065	0.00308529	0.0559228	-2.39391
APOBEC3C	0.889206	4.52526	3.09018	0.00308947	0.0559663	-2.32933
CMTM4	0.642192	6.44834	3.08953	0.00309527	0.0560188	-2.44386
CAMKV	-1.27925	-3.64107	-3.08945	0.00309595	0.0560188	-1.85092
CCL28	-1.16884	2.68896	-3.08779	0.00311082	0.0562554	-2.29513
RP11-527H14.1	-1.54885	-1.64521	-3.08707	0.00311729	0.0563399	-1.96142
AC132217.4	-2.18087	-1.47017	-3.0864	0.00312329	0.0564156	-2.00085
RNLS	-0.788842	3.76379	-3.08586	0.00312812	0.0564703	-2.36381
SERPINF1	1.37303	4.63319	3.08552	0.00313117	0.0564928	-2.3325
CFH	1.35143	5.45686	3.08481	0.00313759	0.0565761	-2.38687
WHAMML1	-0.499718	3.93691	-3.08365	0.00314807	0.0567154	-2.38168
HTATIP2	0.928206	3.87781	3.08355	0.00314895	0.0567154	-2.31014
TH	-1.57186	-2.26171	-3.0831	0.00315304	0.0567566	-1.92934
RIC3	1.02792	3.9376	3.08263	0.00315733	0.0568011	-2.29698
TNFRSF1B	0.890592	5.36062	3.08124	0.00316998	0.0569959	-2.41406
HIST3H2A	-1.19539	2.53079	-3.08054	0.00317638	0.0570504	-2.30221
RP4-669L17.1	-1.44078	-1.85266	-3.08051	0.00317666	0.0570504	-1.95567
COBL	-1.09996	5.93236	-3.07953	0.00318561	0.0571784	-2.48814
CD300A	1.02201	2.45607	3.07895	0.00319093	0.0572411	-2.18407
RP11-548B3.3	-1.50763	-3.65681	-3.07749	0.00320426	0.0574473	-1.88521
MS4A7	1.06075	5.07415	3.07689	0.00320981	0.0574991	-2.40155
LINC00642	-1.50478	-2.43989	-3.07673	0.00321133	0.0574991	-1.93619
CACNA1B	-2.04475	-0.34756	-3.07658	0.00321266	0.0574991	-2.10902
GPR39	1.07582	1.44514	3.07638	0.00321452	0.0574995	-2.09875
RP11-438D8.2	-1.2818	-3.31826	-3.07588	0.00321914	0.0575493	-1.8938
RP11-669E14.6	-1.21526	-3.91926	-3.07523	0.00322516	0.057624	-1.88017
TLR5	0.823968	3.56749	3.07397	0.00323681	0.0577991	-2.30343
TMEM240	-0.936117	1.64456	-3.07332	0.00324292	0.0578752	-2.25117
ACSF2	0.879095	4.80096	3.07209	0.00325435	0.0580461	-2.4042
RARB	-0.695532	4.19916	-3.07064	0.00326792	0.0582549	-2.43655
RP1-137F1.3	-1.1754	-3.94287	-3.07025	0.00327159	0.0582872	-1.89171
SLC35F2	0.948775	3.02825	3.06919	0.00328152	0.0584105	-2.26061
LINC01134	-0.835758	1.26692	-3.06893	0.00328397	0.0584105	-2.20811
RP11-104C4.2	-1.27441	-3.94427	-3.06876	0.00328555	0.0584105	-1.89662
HOOK2	0.948431	4.75002	3.06872	0.00328597	0.0584105	-2.40543
NTN4	-1.07958	5.82441	-3.06808	0.00329198	0.0584702	-2.51498
AIM1	0.69177	5.82179	3.06797	0.00329307	0.0584702	-2.47228
SMIM1	-1.22128	1.86824	-3.06771	0.0032955	0.0584801	-2.29153
SMLR1	-1.00635	0.715221	-3.06663	0.00330568	0.0586275	-2.17664
APOC2	-1.51967	0.494999	-3.06638	0.00330806	0.0586366	-2.18961
KCTD1	0.726699	5.12568	3.06568	0.00331468	0.0587207	-2.45924
CX3CR1	1.08855	3.69323	3.06509	0.00332034	0.0587876	-2.32959
RP11-6O2.4	-1.67344	1.49785	-3.0641	0.0033298	0.0589218	-2.28405
AC108142.1	-1.43051	2.02581	-3.06382	0.00333246	0.0589356	-2.33749
MIR600HG	-0.559594	4.62393	-3.06335	0.00333693	0.0589547	-2.47454
HMGB3P8	-2.17015	-0.79929	-3.06331	0.00333731	0.0589547	-2.11333
TRERF1	0.696843	4.86665	3.06234	0.00334662	0.0590858	-2.43463
IMMP1LP1	1.30568	-1.04263	3.06209	0.00334895	0.0590937	-1.95117
USP18	-0.679365	2.37068	-3.06169	0.00335282	0.0591237	-2.31242
ADPRHL1	-0.994948	2.38283	-3.06152	0.00335443	0.0591237	-2.33882
CTRL	-0.852719	1.4143	-3.06093	0.00336012	0.0591907	-2.25627
OR4F5	-1.67002	-2.32034	-3.06071	0.00336229	0.0591957	-1.99066
SPINT1	1.3542	5.36411	3.05904	0.00337841	0.0594459	-2.45293
COL6A3	1.38006	7.53005	3.05788	0.00338957	0.059604	-2.54652
ATXN7L2	0.772347	3.78281	3.05771	0.0033912	0.059604	-2.36984
TP53BP1	0.380011	6.93658	3.05742	0.00339408	0.0596142	-2.5498
RP11-51J9.6	-1.04944	-1.21006	-3.05726	0.00339559	0.0596142	-2.0461
BATF2	0.812625	1.83664	3.05586	0.00340922	0.0597816	-2.20423
STAMBPL1	-0.600264	3.98516	-3.05581	0.00340974	0.0597816	-2.45603
RYR1	1.84305	5.05418	3.05569	0.00341086	0.0597816	-2.4252
CCDC110	1.18277	0.577175	3.05534	0.00341427	0.0598079	-2.07923
NONO	0.574745	6.9021	3.05462	0.00342137	0.0598989	-2.55094
SLC9B2	-0.794231	3.29103	-3.05357	0.00343164	0.0600065	-2.41525
RP11-632K20.7	-0.553913	3.94256	-3.05355	0.00343183	0.0600065	-2.45674
SLC8B1	0.584953	5.04488	3.05323	0.00343501	0.0600065	-2.48321
DLG2	0.846514	3.09979	3.05321	0.00343519	0.0600065	-2.32315
RP11-834C11.6	-0.987338	-1.07341	-3.05236	0.0034435	0.0601126	-2.06762
OTOGL	-1.27985	1.66541	-3.0522	0.0034451	0.0601126	-2.30823
EGLN2	0.549479	6.19787	3.04931	0.00347369	0.0605603	-2.54228
IPO8	-0.502492	5.74947	-3.04902	0.0034765	0.0605603	-2.55143
C11orf63	1.01583	2.77073	3.04902	0.00347656	0.0605603	-2.28797
BANF1P4	-1.25973	-2.11921	-3.0481	0.00348573	0.0606862	-2.01362
KRT8P4	1.3862	-0.0343376	3.04699	0.00349678	0.0607965	-2.04541
NPIPB4	0.604601	6.87535	3.04651	0.00350158	0.0607965	-2.57113
CMKLR1	0.902487	4.58016	3.04627	0.00350397	0.0607965	-2.45603
RAB39B	1.34193	0.817117	3.04627	0.00350401	0.0607965	-2.11342
USP17L15	-1.12303	0.603673	-3.04626	0.00350404	0.0607965	-2.23481
C5orf45	0.51307	6.23343	3.04626	0.00350409	0.0607965	-2.55573
PDZD8	-0.455844	6.8169	-3.0461	0.00350566	0.0607965	-2.59067
RP11-513G11.2	-1.48779	-0.224381	-3.04526	0.00351412	0.0608822	-2.17599
SDC2	-0.816805	6.18393	-3.04512	0.00351548	0.0608822	-2.58136
FAM189A1	-1.48213	3.61878	-3.04503	0.00351644	0.0608822	-2.49038
SSC5D	1.22667	3.90968	3.04348	0.00353198	0.0611175	-2.39633
PGAM1P4	-1.0236	-1.56573	-3.04225	0.00354441	0.0612987	-2.05598
RBFOX1	-1.98073	0.126059	-3.04188	0.00354819	0.0613085	-2.23186
ADH6	-1.50797	2.57152	-3.04163	0.00355072	0.0613085	-2.43094
PPAP2C	1.60069	2.32393	3.04161	0.00355085	0.0613085	-2.24548
ITGA9	0.838186	5.25641	3.04107	0.00355632	0.0613691	-2.51494
RP11-509E10.1	-1.81089	-2.87025	-3.04064	0.00356066	0.0614101	-2.0128
RP4-598P13.1	-1.13306	1.97629	-3.0391	0.00357637	0.0616131	-2.36526
RP11-197K3.1	-0.917855	2.31375	-3.0391	0.00357637	0.0616131	-2.38417
HOXA3	-0.829673	5.26718	-3.03824	0.00358518	0.061731	-2.57116
CTC-457E21.1	1.88208	-0.244155	3.03773	0.00359035	0.0617859	-2.03265
ADAMTS10	0.959787	4.92465	3.03708	0.00359705	0.0618673	-2.50319
RP11-609D21.3	1.66759	2.02909	3.03627	0.00360534	0.0619758	-2.2262
FGF13	1.10988	3.05701	3.03577	0.0036105	0.0620036	-2.34162
RP11-629O1.2	-0.933846	-1.10648	-3.03573	0.00361092	0.0620036	-2.10459
RNA5SP290	-1.30135	-3.79608	-3.0344	0.00362457	0.0621837	-1.98719
RPS3AP15	-1.37613	-2.71001	-3.03433	0.00362538	0.0621837	-2.02062
RCN3	0.926214	3.97574	3.03346	0.00363435	0.0623034	-2.44998
RP11-334A14.2	-1.17341	-0.502229	-3.03307	0.00363839	0.0623293	-2.17087
ATIC	-0.628315	5.05187	-3.03293	0.00363984	0.0623293	-2.56854
MYO7B	-1.73176	7.25687	-3.03093	0.0036606	0.0626463	-2.65517
THRSP	-1.41162	-0.428271	-3.03076	0.00366236	0.0626463	-2.19032
CTD-2017F17.2	0.704659	1.0324	3.03002	0.0036701	0.0627173	-2.20949
SDPR	-0.957563	5.29269	-3.02998	0.00367052	0.0627173	-2.59829
C3orf30	-1.3761	-2.11589	-3.02951	0.00367545	0.0627628	-2.06648
GPSM3	0.837552	3.55321	3.02934	0.00367719	0.0627628	-2.41635
HERC2P9	0.447297	5.44331	3.02878	0.00368311	0.0628297	-2.56773
GPX8	1.04505	3.51893	3.02674	0.00370447	0.0631595	-2.41024
RP11-120E13.1	-1.59176	-3.17928	-3.02646	0.0037075	0.0631768	-2.02962
WI2-87327B8.2	-1.78544	-0.374082	-3.02624	0.00370975	0.0631808	-2.23
DKK3	1.17277	5.55439	3.02528	0.00371993	0.0633197	-2.55165
PCDHA13	1.49724	1.4155	3.0237	0.00373671	0.0634752	-2.21187
TWSG1	0.818482	4.81348	3.02354	0.00373834	0.0634752	-2.53348
CCDC149	-0.388552	4.4427	-3.02354	0.00373842	0.0634752	-2.56332
NDUFA9P1	0.751661	1.05086	3.02353	0.0037385	0.0634752	-2.22333
NPIPB5	0.676272	7.31913	3.02332	0.00374068	0.0634752	-2.64484
HOXD9	0.970055	3.79515	3.02327	0.00374123	0.0634752	-2.44897
HNRNPA1P61	-1.27348	-1.98685	-3.02267	0.00374767	0.06355	-2.09265
P2RY6	0.899215	2.70174	3.02244	0.00375013	0.0635573	-2.36007
RP11-33A14.3	-1.50958	-1.94599	-3.0216	0.00375905	0.063674	-2.107
PFDN1	-0.436699	4.89559	-3.0206	0.00376979	0.0638214	-2.5942
PINX1	-0.546654	2.46446	-3.02009	0.00377516	0.0638558	-2.4237
NLGN4X	1.33702	1.95363	3.02003	0.0037759	0.0638558	-2.27825
FAM207BP	-1.40121	-2.06632	-3.01956	0.00378087	0.0638828	-2.1002
C1QB	1.24555	5.61484	3.0195	0.00378158	0.0638828	-2.57615
KLK1	3.48463	2.01223	3.01843	0.00379307	0.0640424	-2.16101
FRMD5	1.2752	1.77866	3.01748	0.00380328	0.0641801	-2.27146
RP11-541H12.1	-1.51875	-3.42508	-3.01711	0.00380727	0.0642128	-2.04293
MYO15B	0.771163	7.83193	3.01653	0.00381355	0.064284	-2.6738
PRKD1	0.574293	4.61038	3.01598	0.00381949	0.0643496	-2.55687
RP11-658F2.3	0.887503	1.3262	3.01447	0.0038359	0.0645575	-2.26414
CORO7-PAM16	-1.84945	-3.32406	-3.01437	0.00383702	0.0645575	-2.05874
DUXAP10	1.85943	2.7765	3.01428	0.00383802	0.0645575	-2.34573
SH3RF3	-1.21863	5.92127	-3.01404	0.00384066	0.0645671	-2.6619
NIPA1	-0.622947	4.98665	-3.01333	0.00384836	0.0646545	-2.62008
ADK	-0.588529	3.85862	-3.01318	0.00384998	0.0646545	-2.55268
RP11-382A20.6	-1.64709	-1.31827	-3.01254	0.00385695	0.0647368	-2.18106
LNP1	-1.03934	1.90505	-3.0123	0.00385964	0.0647472	-2.43226
AFMID	-0.947195	6.48174	-3.01172	0.00386603	0.0648198	-2.68349
CUEDC1	0.691576	5.51601	3.00946	0.00389081	0.0652003	-2.61955
KCTD17	0.890706	2.93158	3.0088	0.00389809	0.0652872	-2.41182
AC011343.1	-1.48987	-0.403932	-3.00795	0.00390758	0.0654113	-2.25844
RP13-392I16.1	-1.9684	-0.692909	-3.00705	0.00391753	0.0655131	-2.25596
GLT8D2	1.08856	2.02823	3.00702	0.00391785	0.0655131	-2.33227
RP11-274A11.4	-0.655113	3.15471	-3.0068	0.00392024	0.0655181	-2.52318
ACSM2B	-2.3291	7.26553	-3.00648	0.00392385	0.0655434	-2.72484
RP1-102E24.6	-1.34098	-2.62995	-3.00402	0.00395133	0.0659671	-2.10537
SERPING1	0.864219	6.68098	3.00364	0.00395551	0.0660018	-2.67174
SFMBT2	0.636858	5.11771	3.00304	0.00396232	0.0660802	-2.60761
RP11-78J21.6	-1.31982	-1.25538	-3.00253	0.00396799	0.0661394	-2.19285
TMEM26	0.902528	2.30699	3.00138	0.00398096	0.0663005	-2.38015
KCNK6	0.905361	3.66095	3.00122	0.00398276	0.0663005	-2.51229
ABCC6	-1.28848	4.70601	-3.00111	0.003984	0.0663005	-2.65714
CDSN	-2.51229	-2.77949	-3.00052	0.00399062	0.0663754	-2.14884
RPL39L	-0.96785	0.0439792	-3.00017	0.0039946	0.0663829	-2.29445
MYO1E	0.521108	6.81303	2.99986	0.00399811	0.0663829	-2.69112
MAZ	-0.681797	6.789	-2.99975	0.00399931	0.0663829	-2.71506
BMPR1B	-1.10748	3.25926	-2.99973	0.00399956	0.0663829	-2.57444
RP11-37B2.1	0.51682	4.92874	2.99944	0.00400281	0.0664016	-2.62369
ABCC5	0.458573	7.09102	2.999	0.00400786	0.0664446	-2.70459
AC007559.1	-1.46205	-2.87713	-2.99884	0.00400964	0.0664446	-2.10666
LINC00475	-1.29611	1.78773	-2.99835	0.00401526	0.0665024	-2.46516
RP5-850O15.3	-1.46833	-2.78108	-2.99756	0.0040242	0.0666153	-2.11625
ACSM6	-1.04335	0.232759	-2.99599	0.00404216	0.0668772	-2.31667
PLCXD1	-0.734193	2.98419	-2.99472	0.00405667	0.0670819	-2.56118
VMA21	-0.849459	5.53751	-2.99437	0.00406063	0.0671118	-2.69568
C2orf72	-1.38672	1.38534	-2.99394	0.00406565	0.0671593	-2.45027
LINC01558	-1.65435	1.69686	-2.99372	0.00406811	0.0671645	-2.5093
RIMKLB	0.602045	6.51911	2.99327	0.00407327	0.0672143	-2.70188
PAH	-2.71545	6.69594	-2.99061	0.004104	0.0676858	-2.75933
FAM86JP	-0.783989	0.785023	-2.99023	0.00410839	0.0677225	-2.36828
PDCD6	-0.580575	6.49035	-2.98965	0.00411518	0.0677987	-2.73215
OLFML3	1.06119	3.74968	2.9893	0.00411925	0.0678295	-2.52299
MSRB3	0.912694	5.07132	2.98903	0.00412237	0.0678295	-2.63815
MYO1F	0.854788	5.05443	2.98865	0.00412685	0.0678295	-2.63186
ATL3	0.846633	6.21678	2.98828	0.00413114	0.0678295	-2.68944
TPM4	0.937631	7.34566	2.98825	0.00413151	0.0678295	-2.7312
NAP1L5	-0.576012	3.35286	-2.98819	0.00413221	0.0678295	-2.58961
PCDHA4	1.30593	1.69112	2.98819	0.00413222	0.0678295	-2.34055
PALLD	0.838787	7.08036	2.98536	0.00416532	0.0683246	-2.73296
LAIR1	0.822132	4.54094	2.98508	0.00416861	0.0683246	-2.62456
BMP2KL	0.918677	2.46284	2.98505	0.00416893	0.0683246	-2.4426
TMEM140	-0.627818	5.68954	-2.98458	0.00417445	0.0683794	-2.72397
GPR161	0.651926	3.98414	2.98318	0.00419102	0.0686148	-2.58841
KIAA0226	0.376062	5.90799	2.98222	0.00420244	0.0687658	-2.71368
ACSM5P1	-1.85306	-0.737554	-2.98198	0.0042052	0.068775	-2.33172
PAK3	1.05965	1.26122	2.98156	0.00421023	0.0688214	-2.32882
ZNF319	-0.672361	4.5567	-2.98122	0.00421429	0.0688517	-2.68211
RP11-8L18.3	-0.829175	0.509543	-2.98073	0.00422006	0.0688904	-2.37966
CHL1	1.52272	4.21086	2.98065	0.00422106	0.0688904	-2.56419
RP11-55J15.2	-1.10928	-1.39035	-2.98031	0.00422514	0.0688914	-2.23316
RP4-635A23.3	-0.956865	-0.567134	-2.9801	0.00422754	0.0688914	-2.29131
FAM90A12P	-1.65751	-1.3491	-2.98008	0.00422778	0.0688914	-2.26051
COMMD9	-0.482741	4.74765	-2.9799	0.00422992	0.0688914	-2.69133
SHC1	0.54536	6.69828	2.97855	0.00424615	0.0691198	-2.74454
PRMT1P1	0.989953	1.40996	2.97779	0.00425525	0.0691965	-2.36118
RP11-509E10.3	-1.93699	-2.13657	-2.97778	0.00425529	0.0691965	-2.22183
MANSC1	0.697374	3.17271	2.97636	0.00427234	0.0694101	-2.54563
GGTLC2	-1.51212	-1.1012	-2.97632	0.00427286	0.0694101	-2.28399
RGS18	1.15494	0.812404	2.97577	0.00427951	0.0694821	-2.31025
ARHGEF17	0.567777	7.81499	2.97517	0.00428675	0.0695636	-2.78248
ADIG	-1.63372	-3.062	-2.97418	0.00429865	0.0696934	-2.16656
THUMPD3P1	-1.0683	-0.239564	-2.97414	0.0042992	0.0696934	-2.34061
PRPH2	0.817157	1.50111	2.97386	0.00430256	0.0697117	-2.38463
FBXO21	-0.581568	5.87768	-2.97359	0.00430585	0.0697289	-2.75274
RP5-1159O4.1	-0.749047	2.00111	-2.97316	0.00431112	0.0697588	-2.52466
KIF7	1.08981	3.40759	2.97307	0.00431215	0.0697588	-2.53311
CYP2W1	-0.878143	0.725661	-2.97257	0.00431818	0.0698202	-2.41492
PAX9	-1.24521	-1.8983	-2.97171	0.00432863	0.0699531	-2.22514
RHBDL3	-1.0339	-0.0486227	-2.97151	0.00433111	0.0699571	-2.35867
ZSCAN2	-0.547541	3.84245	-2.97055	0.0043428	0.0701097	-2.67708
RP13-104F24.2	0.824538	4.42554	2.97011	0.00434821	0.0701608	-2.65106
RASSF8-AS1	-0.610302	4.07216	-2.96963	0.0043541	0.0702196	-2.69387
CAMKK1	-0.984389	4.8661	-2.9689	0.00436307	0.0703282	-2.73757
AC007327.6	-1.32164	-2.71138	-2.96742	0.0043813	0.0705857	-2.18854
ARHGEF4	-1.64634	3.69687	-2.96611	0.00439736	0.0707923	-2.70628
NRAP	-1.27017	1.13876	-2.96601	0.00439865	0.0707923	-2.48319
RP11-231I13.2	-1.76828	-3.05953	-2.96468	0.0044151	0.0710204	-2.19126
KLK4	5.41271	3.61801	2.96365	0.00442793	0.0711902	-2.31273
EYA2	1.4176	1.87189	2.96303	0.00443562	0.071252	-2.41665
DDX3P1	1.06443	2.75123	2.96298	0.00443632	0.071252	-2.51101
CLEC1A	1.37049	0.713273	2.9627	0.00443977	0.0712545	-2.32094
CTBP2	-0.331796	6.28891	-2.96258	0.0044413	0.0712545	-2.79241
SACS	-0.642959	6.12332	-2.96242	0.00444331	0.0712545	-2.79505
SLCO3A1	-0.56644	5.74056	-2.96163	0.00445313	0.0713755	-2.78181
RP3-395M20.12	1.12556	2.7779	2.96138	0.00445623	0.0713886	-2.51574
RP11-343C2.7	-1.77307	-1.0129	-2.96043	0.00446813	0.0714989	-2.33774
PTPN9	0.358814	5.40333	2.9603	0.00446986	0.0714989	-2.75293
SCARF1	0.865879	4.89283	2.96029	0.00446997	0.0714989	-2.70198
ALG3P1	-1.22266	-1.15999	-2.95988	0.0044751	0.071523	-2.30619
CTC-261N6.2	-1.64715	-2.75278	-2.95956	0.00447905	0.071523	-2.21701
RP1-225E12.3	-1.38927	-3.29367	-2.9593	0.00448232	0.071523	-2.18734
SLFNL1	-0.987574	4.04151	-2.95917	0.00448401	0.071523	-2.71958
FAM171A2	1.07006	1.68708	2.95915	0.00448431	0.071523	-2.4259
PSMB10	-0.705435	4.35871	-2.95908	0.00448518	0.071523	-2.73542
MAPK11	1.00373	2.78916	2.95883	0.00448825	0.0715354	-2.53
CYP2E1	0.930201	1.315	2.95854	0.00449191	0.0715575	-2.41094
SORD	-0.891306	5.1157	-2.95826	0.00449542	0.0715769	-2.77296
BNIP3P1	-0.718002	0.0283009	-2.95689	0.00451278	0.0718168	-2.38455
MIR497HG	0.945911	2.4226	2.95654	0.00451721	0.0718507	-2.5009
ITGA11	0.987091	5.3306	2.95568	0.00452813	0.0719879	-2.73473
SLC6A1	1.28924	4.30428	2.95326	0.00455898	0.0724079	-2.66406
NCMAP	1.67603	0.396656	2.95314	0.00456049	0.0724079	-2.29964
FTH1	0.827038	10.4053	2.95306	0.00456149	0.0724079	-2.87716
RP11-578F21.6	-0.956825	-0.423137	-2.95107	0.00458702	0.0727094	-2.37617
CTD-2033D15.3	-1.1161	3.05236	-2.95094	0.00458875	0.0727094	-2.69051
TCF7L1	0.765	4.02945	2.95091	0.00458908	0.0727094	-2.6715
CTD-2523D13.1	-1.19503	-2.47874	-2.95086	0.00458978	0.0727094	-2.23829
RP1-169K13.3	1.34255	1.10117	2.95063	0.00459277	0.0727201	-2.38402
RP11-977B10.2	1.21645	-0.984536	2.94783	0.00462891	0.0732551	-2.24274
PSME2	0.469833	4.8772	2.94698	0.00463998	0.0733545	-2.75125
PML	0.5271	6.74687	2.94682	0.00464199	0.0733545	-2.82843
CFAP46	-0.917603	2.55005	-2.9468	0.00464222	0.0733545	-2.64337
CICP27	0.78394	2.78502	2.94622	0.00464981	0.0734374	-2.56799
RP11-164C1.2	-1.23837	-3.79817	-2.94602	0.00465244	0.0734419	-2.20452
DHRSX	-0.482655	3.81071	-2.94438	0.00467388	0.0737431	-2.73746
NBPF3	-0.501109	3.4416	-2.94408	0.00467771	0.0737665	-2.69754
TAS2R38	-1.43585	-3.39209	-2.94367	0.00468307	0.0738138	-2.22387
IGFBP6	1.48115	3.57945	2.94271	0.0046957	0.0739756	-2.60578
CTD-2538A21.1	-1.15673	-3.33164	-2.94132	0.00471407	0.0742276	-2.22742
RP11-539D10.2	-1.40295	-3.5623	-2.94003	0.0047311	0.0744583	-2.22772
RP11-295K3.1	1.00934	6.00574	2.93933	0.00474028	0.0745376	-2.81126
LTBP2	1.18299	6.66862	2.93929	0.0047409	0.0745376	-2.83001
CLSTN1	-0.649895	8.06853	-2.93891	0.00474593	0.0745793	-2.8974
BAHCC1	0.892151	5.72987	2.93785	0.00476006	0.0747298	-2.80439
LRP4-AS1	-1.10636	-1.11377	-2.93783	0.00476029	0.0747298	-2.3579
ELMOD1	-1.33979	0.349165	-2.93693	0.00477227	0.0748805	-2.49738
RPS4XP7	-1.40196	-2.73613	-2.93621	0.00478193	0.0749944	-2.26681
GDF11	0.552776	4.44679	2.93478	0.00480098	0.0752287	-2.75182
MAPK12	0.934778	3.62602	2.93472	0.00480184	0.0752287	-2.6592
SNORA70F	-1.37233	-2.92921	-2.93455	0.00480408	0.0752287	-2.2621
[truncated: 29,304 more rows]

## Sheet: NMF_Cluster_4_DEGenes
GeneSymbol	logFC	AveExpr	t	P.Value	adj.P.Val	B
LINC01310	-5.64584	-1.23396	-8.61223	6.61996e-12	2.07225e-07	16.2003
CECR3	-2.7354	1.15114	-7.7413	1.83842e-10	2.8774e-06	13.3808
CAPN3	-2.43187	5.9052	-6.82386	6.22126e-09	6.49147e-05	10.2879
BCHE	-3.13577	0.0853264	-6.6315	1.2994e-08	9.92538e-05	9.37154
EMR2	-2.57506	4.10076	-6.52798	1.92997e-08	9.92538e-05	9.2021
TRIM16L	-1.66483	3.03968	-6.50779	2.08456e-08	9.92538e-05	9.09921
CNTN6	-5.10707	1.4648	-6.49136	2.21952e-08	9.92538e-05	9.0369
DCHS1	1.60905	6.21302	6.32321	4.21213e-08	0.000164816	8.4594
AKR1B10	-5.32514	1.10409	-6.13814	8.50402e-08	0.000275342	7.77334
PCDH1	2.15228	5.941	6.12923	8.79602e-08	0.000275342	7.75696
SOX13	1.04538	6.14541	5.99513	1.46024e-07	0.000401111	7.28916
NEAT1	-1.45729	14.0654	-5.96103	1.66057e-07	0.000401111	7.16708
FAM8A6P	-4.32772	-0.693759	-5.9602	1.6658e-07	0.000401111	7.03942
CRB3P1	-3.29593	-2.64909	-5.84541	2.56532e-07	0.000540235	6.32454
TTC39A	-1.62865	5.90489	-5.84299	2.58874e-07	0.000540235	6.74819
FAM69B	1.35256	3.72077	5.80575	2.97692e-07	0.000582416	6.5685
MAPK4	3.67549	3.56315	5.73194	3.92452e-07	0.000722643	6.15288
ARAP3	1.37752	4.66127	5.64742	5.38042e-07	0.000902389	6.05026
SEZ6L	-3.32026	0.626007	-5.62906	5.76127e-07	0.000902389	5.95779
PLCB1	1.84002	5.08093	5.60735	6.24636e-07	0.000902389	5.91242
HEXA	-0.863843	7.55268	-5.5948	6.5447e-07	0.000902389	5.86577
TPD52L1	-1.54894	4.09581	-5.58565	6.77126e-07	0.000902389	5.84241
VANGL1	-1.12548	5.09128	-5.58082	6.89396e-07	0.000902389	5.82375
KCNN3	2.41055	3.85613	5.57285	7.10105e-07	0.000902389	5.73477
NOVA2	1.83393	3.53921	5.56887	7.20689e-07	0.000902389	5.72768
FLT4	1.71794	5.14289	5.55435	7.60612e-07	0.000915748	5.72971
ZBED6CL	-1.26398	3.83195	-5.52869	8.36582e-07	0.000969908	5.64387
IRX2	3.7512	3.05351	5.48007	1.00164e-06	0.00111979	5.24563
SLC17A5	-1.43685	4.98334	-5.45831	1.08559e-06	0.00115571	5.39479
ZNF648	-2.55271	-1.68146	-5.45288	1.10761e-06	0.00115571	5.11815
DRAM1	-0.980332	5.21711	-5.39378	1.37746e-06	0.00139092	5.17027
PAIP2B	-2.0322	4.685	-5.36435	1.53512e-06	0.00142339	5.06754
FAM101B	1.55948	3.89586	5.36388	1.53775e-06	0.00142339	5.05577
SLC10A2	-4.58802	2.90391	-5.36242	1.54603e-06	0.00142339	5.06549
LINC01010	-3.48003	0.2801	-5.34912	1.62354e-06	0.00145205	4.9954
SYT7	2.60447	2.17453	5.30164	1.93279e-06	0.00168061	4.66608
SH2D5	-2.28052	-0.407923	-5.27623	2.12135e-06	0.00179472	4.67076
RP1-287H17.1	-4.38865	-0.999217	-5.2434	2.39213e-06	0.00195552	4.60528
GPRC5B	1.1461	5.9063	5.23204	2.4935e-06	0.00195552	4.61575
LINC01567	-2.46872	5.13954	-5.22707	2.53924e-06	0.00195552	4.58845
TKT	-1.16358	6.76594	-5.2247	2.56129e-06	0.00195552	4.57505
TSPYL5	1.56867	4.8634	5.19436	2.8611e-06	0.0021324	4.49356
ABCB6	-1.47983	3.51872	-5.18771	2.93134e-06	0.00213395	4.46825
SNHG16	-1.32515	6.3468	-5.16503	3.18374e-06	0.0022269	4.37115
GATA2	2.0086	3.90186	5.16352	3.20131e-06	0.0022269	4.37245
SETDB2	-0.969196	5.58533	-5.1438	3.43933e-06	0.00234046	4.30486
NQO1	-2.00182	4.00845	-5.137	3.52531e-06	0.00234793	4.28924
AC009403.2	-0.950661	2.25818	-5.12786	3.64434e-06	0.00237664	4.26319
TRIM16	-1.04609	4.14544	-5.07357	4.43707e-06	0.00276917	4.07686
IRX1	4.63614	3.43692	5.06975	4.49893e-06	0.00276917	3.8863
AKR1B10P1	-2.60857	-2.94516	-5.06897	4.51164e-06	0.00276917	3.73156
ZNF518B	1.37284	4.49509	5.05862	4.68366e-06	0.00280093	4.03525
GPR19	-2.51069	-1.80452	-5.05459	4.75241e-06	0.00280093	3.8356
SLIT2	1.82439	6.18577	5.05001	4.83181e-06	0.00280093	3.99668
GUCY2EP	-2.94229	-0.107523	-5.02174	5.35115e-06	0.00304558	3.87952
SLC22A23	0.831816	5.39557	5.01425	5.49768e-06	0.00307311	3.87619
RENBP	-1.57845	4.83412	-5.00698	5.64371e-06	0.00309939	3.84154
SPAG9	-0.77111	7.91422	-4.99396	5.91473e-06	0.00318787	3.779
RP5-1148A21.3	-1.67527	0.759843	-4.98506	6.10715e-06	0.00318787	3.76648
AC009133.12	-1.23473	3.46664	-4.98492	6.11035e-06	0.00318787	3.78293
NOTCH4	1.52075	5.99737	4.97853	6.25245e-06	0.00320853	3.75462
CWC25	-0.722663	4.47743	-4.9652	6.55951e-06	0.00328486	3.70879
RP11-381K20.2	2.41024	0.657468	4.96302	6.61107e-06	0.00328486	3.39702
RP11-149I23.3	-2.03712	-0.0820858	-4.94002	7.18039e-06	0.003512	3.59138
RP11-557H15.3	-3.55488	-2.04004	-4.91429	7.87414e-06	0.00379207	3.44624
RP11-443P15.2	-2.42087	-0.368599	-4.86145	9.51172e-06	0.0044845	3.33524
AGGF1P1	-2.19037	-0.490523	-4.8589	9.59849e-06	0.0044845	3.31429
EFNB2	1.48772	4.95127	4.85077	9.8812e-06	0.00454869	3.33907
MRGPRE	-3.60525	1.68734	-4.8397	1.02789e-05	0.00466317	3.30339
ATP1B2	2.00282	3.66603	4.83252	1.05452e-05	0.00466652	3.27846
CHI3L2	-1.89312	1.8141	-4.83147	1.05844e-05	0.00466652	3.2812
RP11-309L24.4	-2.19941	6.32906	-4.80494	1.16323e-05	0.0050573	3.14477
FRMD1	3.70033	3.72662	4.79477	1.20603e-05	0.00506259	3.11564
MAP7	-1.32453	5.32641	-4.79372	1.21055e-05	0.00506259	3.12015
SLFN13	-1.53194	4.59884	-4.79316	1.21296e-05	0.00506259	3.1249
SLC11A2	-1.04231	6.37004	-4.78743	1.23787e-05	0.00509855	3.09056
CD24P4	-1.71904	3.75075	-4.781	1.26643e-05	0.00510907	3.09419
APCDD1	2.10342	2.95616	4.77953	1.27306e-05	0.00510907	3.0852
CATSPERG	-3.83368	5.61464	-4.76611	1.33513e-05	0.00529032	3.0146
TIMP4	-2.2232	-0.291559	-4.76174	1.35594e-05	0.0053056	3.01687
SLC1A2	1.71992	1.21937	4.75587	1.38443e-05	0.00535023	2.91476
FAM43A	1.66918	3.57477	4.74835	1.42181e-05	0.00540715	3.00731
MDGA2	4.67973	0.190853	4.74599	1.43371e-05	0.00540715	2.54453
LINC00494	-1.59403	2.90396	-4.74238	1.45216e-05	0.00541154	2.97976
B4GALNT3	2.6893	3.05491	4.73411	1.49526e-05	0.0055066	2.92788
VN1R81P	-1.81721	-0.914664	-4.72752	1.53048e-05	0.00557061	2.85815
SYNJ2	1.24392	5.50282	4.72426	1.54823e-05	0.00557061	2.90958
TBC1D1	0.811331	6.99942	4.71406	1.60497e-05	0.00570913	2.85241
RP11-557H15.4	-2.85445	1.37033	-4.70983	1.62914e-05	0.00572998	2.8826
UBE2U	-2.85706	-2.27925	-4.70648	1.6485e-05	0.00573365	2.7403
SP6	1.77399	0.0744721	4.69341	1.72624e-05	0.00586859	2.58034
RP11-273G15.2	2.35235	0.193638	4.69067	1.74299e-05	0.00586859	2.53847
SLC17A2	-2.7279	0.70396	-4.69058	1.74354e-05	0.00586859	2.82153
TNRC6A	-1.15861	7.88412	-4.66347	1.91813e-05	0.00631987	2.66708
UBE2QL1	3.38585	2.84432	4.65238	1.99437e-05	0.00631987	2.63079
HSD11B2	3.39205	5.14325	4.65117	2.00288e-05	0.00631987	2.69527
AF186192.5	2.44823	-1.69783	4.6508	2.00547e-05	0.00631987	2.23811
GATA2-AS1	1.83986	1.97215	4.65072	2.00601e-05	0.00631987	2.64222
RP11-342M1.3	-1.35463	-0.254462	-4.64969	2.01329e-05	0.00631987	2.64041
FAM159A	-1.92199	1.51855	-4.64889	2.01893e-05	0.00631987	2.68779
GJA9	-1.42061	1.95841	-4.62851	2.16862e-05	0.00672121	2.62132
CCM2L	1.59121	2.13814	4.62269	2.21334e-05	0.00679256	2.57243
ZNF714	-1.26931	3.73766	-4.61617	2.26445e-05	0.00688195	2.55551
RP11-164J13.1	-1.45666	4.07713	-4.60169	2.38221e-05	0.00717024	2.50098
PDGFB	1.06736	5.12529	4.58989	2.48252e-05	0.00740098	2.47375
PDZD2	1.34709	5.56336	4.58199	2.55202e-05	0.00753641	2.44353
FNIP2	-1.3229	8.64532	-4.57696	2.59719e-05	0.00758748	2.37774
GLB1L	-1.22429	3.98226	-4.5747	2.61779e-05	0.00758748	2.41655
PAK6	1.88394	1.99927	4.5625	2.7316e-05	0.00784471	2.37152
KCP	-1.96791	7.75063	-4.54726	2.8806e-05	0.0081974	2.28255
MYBPH	2.39352	-2.06527	4.53755	2.97964e-05	0.00840285	1.89811
TP53I11	1.32679	5.55047	4.51695	3.20079e-05	0.00894592	2.23202
RBM20	-1.33084	5.35718	-4.51258	3.2497e-05	0.00900225	2.19285
FAM45A	-0.791317	4.8596	-4.49972	3.39806e-05	0.00925356	2.16259
AKR1B15	-2.83507	-2.15328	-4.49878	3.40914e-05	0.00925356	2.12004
RP11-21L23.4	-2.34538	-0.885496	-4.49053	3.50798e-05	0.00925356	2.1482
UNC79	-1.7133	1.6028	-4.48981	3.51674e-05	0.00925356	2.17906
AP001626.1	-2.22526	3.2886	-4.48763	3.54337e-05	0.00925356	2.13701
DAAM2	1.37726	5.86381	4.48717	3.54911e-05	0.00925356	2.13034
GCAT	-1.6377	2.69105	-4.48469	3.57966e-05	0.00925356	2.14594
C2orf70	-1.54263	0.286856	-4.4841	3.58703e-05	0.00925356	2.15203
SLC4A11	2.45805	2.27691	4.4793	3.64707e-05	0.00925356	2.10747
AFAP1L2	1.62607	4.0995	4.47766	3.6679e-05	0.00925356	2.13848
UNC5C	1.5345	3.60861	4.47274	3.73081e-05	0.00925356	2.12662
PRKAG2	2.29234	7.72917	4.47085	3.7553e-05	0.00925356	2.05967
LRRC10B	2.09029	0.0771191	4.46808	3.79147e-05	0.00925356	1.8964
MYOM3	-2.28352	4.54999	-4.46745	3.79974e-05	0.00925356	2.04999
SNED1	1.10273	5.97064	4.46623	3.81581e-05	0.00925356	2.05771
RPS20P31	1.41465	-0.029916	4.46384	3.84742e-05	0.00925356	1.92967
RTN4RL1	2.38384	2.97945	4.46313	3.85688e-05	0.00925356	2.08588
SPACA1	-3.32798	0.250736	-4.46196	3.87252e-05	0.00925356	2.09353
KIF26A	1.82164	3.30962	4.45483	3.96914e-05	0.00935663	2.07073
[truncated: 31,171 more rows]

## Sheet: NMF_Cluster_5_DEGenes
GeneSymbol	logFC	AveExpr	t	P.Value	adj.P.Val	B
[truncated: 31,303 more rows]

[truncated: 1 more sheets: NMF_Clusters_QuSAGE_Res]
